# Supplementary material for: Psychological intervention improves quality of life in patients with early-stage cancer: a systematic review and meta-analysis of randomized clinical trials
Source: PubMed Central journal article supplement (PMC11162999; doi:10.1038/s41598-024-63431-y), 2024-06-09
Supplement: 41598_2024_63431_MOESM1_ESM.pdf [file 41598_2024_63431_MOESM1_ESM.pdf]

# Supplementary Material

## **Psychological Intervention Improves Quality of Life in Patients with Early-Stage Cancer: a Systematic Review and Meta-analysis of randomized clinical trials**

**TABLE S1. SEARCH KEY**

**SECTION S1. STRUCTURE OF ANALYSIS**

**FIGURE S1. PRISMA FLOW CHART**

**TABLE S2. BASELINE CHARACTERISTICS OF THE INCLUDED STUDIES**

**SECTION S2. STATISTICAL ANALYSIS**

**S2.OVERALL PLOTS**

**Figure.S2.1.T12**

**Figure S2.2.T24**

**Figure S2.3.T48**

**S3. SUBGROUP ANALYSIS OF GLOBAL QOL: PROVIDER**

**Figure S3.1.T0**

**Figure S3.2.T12**

**Figure S3.3.T24**

**Figure S3.4.T48**

**S4.SUBGROUP ANALYSIS OF GLOBAL QOL: ENVIRONMENT**

**Figure S4.1.T0**

**Figure S4.2.T12**

**Figure S4.3.T24**

**Figure S4.4.T48**

## **S5.SUBGROUP ANALYSIS OF GLOBAL QOL: TYPE**

**Figure S5.1.T0**

**Figure S5.2.T12**

**Figure S5.3.T24**

**Figure S5.4.T48**

## **S6. SUBGROUP ANALYSIS OF GLOBAL QOL: CANCER STAGE**

**Figure S6.1.T0**

**Figure S6.2.T12**

**Figure S6.3.T24**

**Figure S6.4.T48**

## **S7. SUBGROUP ANALYSIS OF GLOBAL QOL: CANCER TYPE**

**Figure S7.1.T0**

**Figure S7.2.T12**

**Figure S7.3.T24**

**Figure S7.4.T48**

## **S8.SUBGROUP ANALYSIS OF EMOTIONAL QOL: PROVIDER**

**Figure S8.1.T0**

**Figure S8.2.T12**

**Figure S8.3.T24**

**Figure S8.4.T48**

## **S9.SUBGROUP ANALYSIS OF EMOTIONAL QOL: ENVIRONMENT**

**Figure S9.1.T0**

**Figure S9.2.T12**

**Figure S9.3.T24**

**Figure S9.4.T48**

**S10.SUBGROUP ANALYSIS OF EMOTIONAL QOL: TYPE**

**Figure S10.1.T0**

**Figure S10.2.T12**

**Figure S10.3.T24**

**Figure S10.4.T48**

**S11.SUBGROUP ANALYSIS OF EMOTIONAL QOL: CANCER STAGE**

**Figure S11.1.T0**

**Figure S11.2.T12**

**Figure S11.3.T24**

**Figure S11.4.T48**

**Figure S12.1.T0**

**Figure S12.2.T12**

**Figure S12.3.T24**

**Figure S12.4.T48**

**S13.SUBGROUP ANALYSIS OF SOCIAL QOL: PROVIDER**

**Figure S13.1.T0**

**Figure S13.2.T12**

**Figure S13.3.T24**

**Figure S13.4.T48**

**S14.SUBGROUP ANALYSIS OF SOCIAL QOL: ENVIRONMENT**

**Figure S14.1.T0**

**Figure S14.2.T12**

**Figure S14.3.T24**

**Figure S14.4.T48**

**S15.SUBGROUP ANALYSIS OF SOCIAL QOL: TYPE**

**Figure S15.1.T0**

**Figure S15.2.T12**

**Figure S15.3.T24**

**Figure S15.4.T48**

## **S16.SUBGROUP ANALYSIS OF SOCIAL QOL: CANCER STAGE**

**Figure S16.1.T0**

**Figure S16.2.T12**

**Figure S16.3.T24**

**Figure S16.4.T48**

## **S17.SUBGROUP ANALYSIS OF SOCIAL QOL: CANCER TYPE**

**Figure S17.1.T0**

**Figure S17.2.T12**

**Figure S17.3.T24**

**Figure S17.4.T48**

## **S18. SUBGROUP ANALYSIS OF PHYSICAL QOL: PROVIDER**

**Figure S18.1.T0**

**Figure S18.2.T12**

**Figure S18.3.T24**

**Figure S18.4.T48**

## **S19. SUBGROUP ANALYSIS OF PHYSICAL QOL: ENVIRONMENT**

**Figure S19.1.T0**

**Figure S19.2.T12**

**Figure S19.3.T24**

**Figure S19.4.T48**

## **S20. SUBGROUP ANALYSIS OF PHYSICAL QOL: TYPE**

**Figure S20.1.T0**

**Figure S20.2.T12**

**Figure S20.3.T24**

**Figure S20.4.T48**

## **S21. SUBGROUP ANALYSIS OF PHYSICAL QOL: CANCER STAGE**

**Figure S21.1.T0**

**Figure S21.2.T12**

**Figure S21.3.T24**

**Figure S21.4.T48**

## **S22.SUBGROUP ANALYSIS OF PHYSICAL QOL: CANCER TYPE**

**Figure S22.1.T0**

**Figure S22.2.T12**

**Figure S22.3.T24**

**Figure S22.4.T48**

## **S23. TABLE S.3. RISK OF BIAS ASSESSMENT**

### **S24. PUBLICATION BIAS**

**Figure S24.1.Overall Survival**

**Figure S4.2. Recurrence-free Survival**

#### **S24.3.Global Qol**

Figure S24.3.1.Provider

Figure S24.3.2.Environment

Figure S24.3.3.Type

Figure S24.3.4.Duration of Intervention

Figure S24.3.5.Cancer Stage

Figure S24.3.6.Cancer Type

#### **S24.4.Emotional Qol**

Figure S4.4.1.Provider

Figure S24.4.2.Environment

Figure S24.4.3.Type

Figure S24.4.4.Duration of Intervention

Figure S24.4.5.Cancer Stage

Figure S24.4.6.Cancer Type

#### **S24.5.Social Qol**

Figure S24.5.1.Provider  
Figure S24.5.2.Environment  
Figure S24.5.3.Type  
Figure S24.5.4. Duration of Intervention  
Figure S24.5.5.Cancer Stage  
Figure S24.5.6.Cancer Type

**S24.6. Physical Qol**

Figure S24.6.1. Provider  
Figure S24.6.2. Environment  
Figure S24.6.3.Type  
Figure S24.6.4. Duration of Intervention  
Figure S24.6.5. Cancer Stage  
Figure S24.6.6. Cancer Type

**REFERENCES**

Table S1. Search key

| Search Key                                                                                                                                                                                                                                                                                                                                                                                                                                                                                                                                                                                                                                                                                                                                                    | Database |
|---------------------------------------------------------------------------------------------------------------------------------------------------------------------------------------------------------------------------------------------------------------------------------------------------------------------------------------------------------------------------------------------------------------------------------------------------------------------------------------------------------------------------------------------------------------------------------------------------------------------------------------------------------------------------------------------------------------------------------------------------------------|----------|
| (psychotherapy OR psychotherap* OR<br>"mindfulness" OR "cognitive therapy" OR<br>"cognitive treatment" OR "cognitive intervention"<br>OR CBT OR "behavior therapy" OR "behavioral<br>therapy" OR "behaviour therapy" OR "behavioural<br>therapy" OR "behavior<br>treatment" OR "behavioral treatment" OR<br>"behaviour treatment" OR "behavioural treatment"<br>OR "behavior intervention" OR "behavioral<br>intervention" OR "behaviour intervention" OR<br>"behavioural intervention" OR "psychological<br>intervention" OR<br>"psychosocial intervention" OR "psychological<br>support" or "psychosocial support" OR counselling<br>OR counseling)<br>AND (neoplasm OR cancer)<br>AND (random OR randomised OR randomization<br>OR randomly OR randomness) | Medline  |
|                                                                                                                                                                                                                                                                                                                                                                                                                                                                                                                                                                                                                                                                                                                                                               | Embase   |
|                                                                                                                                                                                                                                                                                                                                                                                                                                                                                                                                                                                                                                                                                                                                                               | Central  |

Table S.1. The Search Key. The search key used to identify all eligible studies

## Section S1. Structure of analysis

At first we were interested in whether psychological interventions have an effect on overall and recurrence free survival. Next we continued our analysis to see if cancer patients' QoL can be improved by psychological interventions. We chose to analyze four quality of life domains that we considered the most relevant for psychological interventions: global, physical, emotional, and social.

Subgroup analysis with subcategories.

A. Firstly, we were interested to see if the provider of the interventions made a difference, so we made a provider subgroup and categorized the data from the articles into three subcategories: 1. psychologist, 2. healthcare professional and 3. nurse.. (The healthcare professional could be any personnel who did not belong to the earlier two subcategories. e.g. research assistant, medical doctor, doctoral student, therapists, or if they were mentioned as a team so we could not be specific.)

B. We were also interested to see if the channel or the environment of the interventions are important factors. So, we made three subcategories for that: 1. face-to-face (taking place in a clinical environment), 2. Telephone (taking place in patients' home), or via 3. Online (taking place in patients' home) as described in the included articles.

C. As next step we assessed whether the type of the intervention had any effect on the quality of life so we made again three subcategories: 1. individual, 2. group or 3. guided self-help. (With the guided self help we are referring to the fact that these materials were specifically made in the studies for these patients to improve their quality of life.)

D. Cancer stage: 1. early (I, II), 2. advanced (III, IV), 3. survivors as they were categorized in the original studies, regardless of cancer type.

E. Cancer type: four subcategories were made for this subgroup: 1. breasts, 2. gynecological, 3. gastrointestinal and 4. prostate. For further categories we did not have enough data.

Additionally we were interested to know whether the duration of the intervention was an important factor to improve QoL. Due to the heterogeneity of the durations, frequencies and occasions we could only make subgroups based on how many minutes per patient were used in the articles.

Lastly we wanted to see the time effect of these interventions based on the predicted follow-up times.



Figure S1. PRISMA flow chart

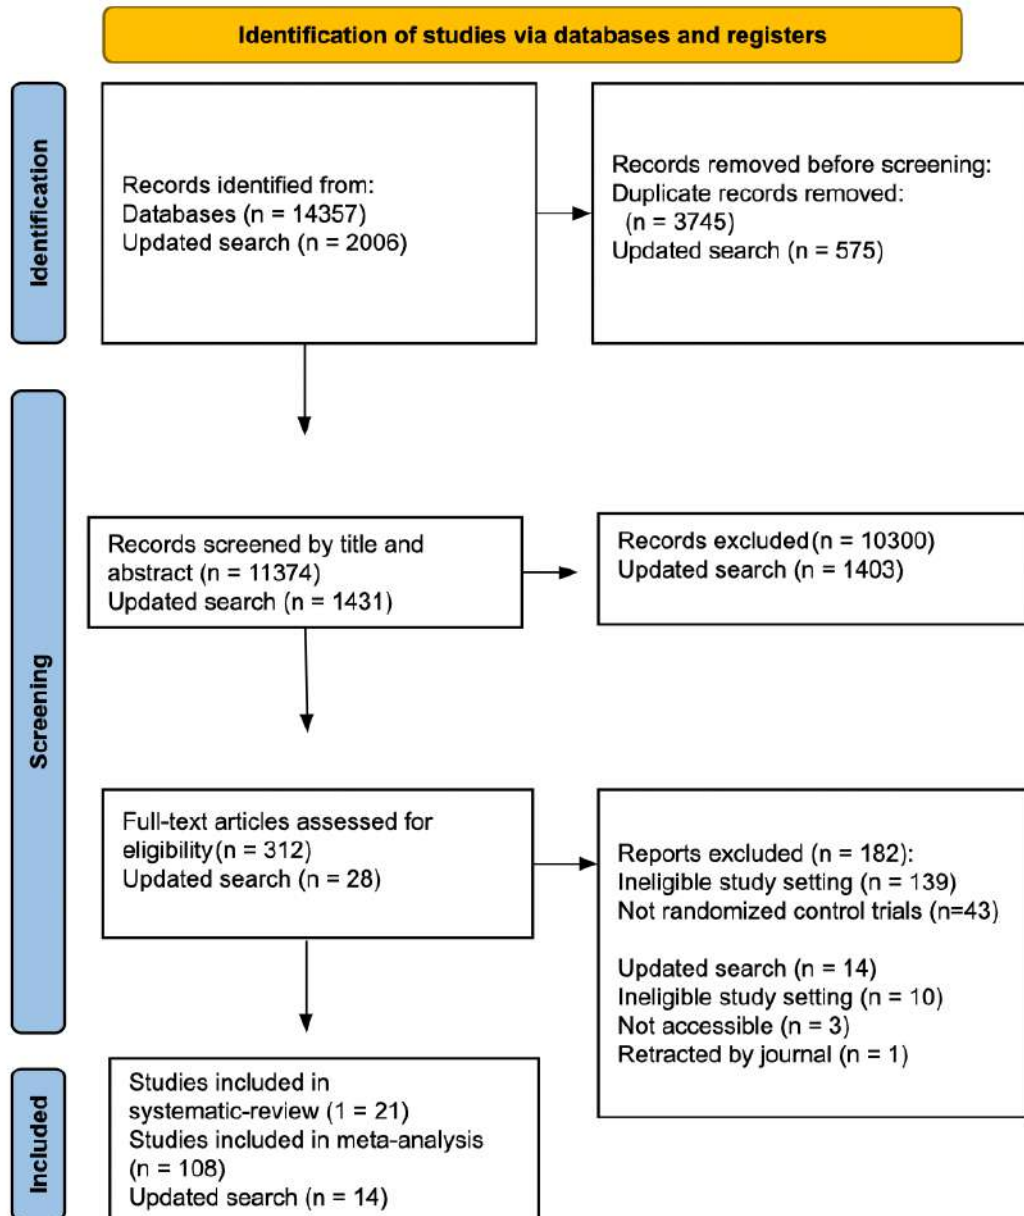

**Figure 1.** PRISMA flow diagram of the screening and selection process. The search was updated during the revision process.

Table S2. Baseline characteristics of the included studies

| Author                                        | Country | Cancer type | Sample size (female% of total) | Sample size (female% of intervention) | Sample size (female% of control) | Intervention name                                                                                | Intervention's duration            | Intervention's provider | Intervention's environment | Intervention type | Outcome | Questionnaire          | Time of the measurement in weeks |
|-----------------------------------------------|---------|-------------|--------------------------------|---------------------------------------|----------------------------------|--------------------------------------------------------------------------------------------------|------------------------------------|-------------------------|----------------------------|-------------------|---------|------------------------|----------------------------------|
| <b>Articles included in the meta-analysis</b> |         |             |                                |                                       |                                  |                                                                                                  |                                    |                         |                            |                   |         |                        |                                  |
| Huri M, et al., 2015 <sup>1</sup>             | Turkey  | prostate    | 34 (0)                         | 19 (0)                                | 15 (0)                           | cognitive behavior therapy based occupational therapy                                            | twice a week, 12 weeks ,60 session | Psy                     | FF                         | G                 | QoL     | EORTC-QLQ-C30 and PR25 | 12                               |
| Giesler, BR, et al., 2005 <sup>2</sup>        | USA     | prostate    | 99 (0)                         | 48 (0)                                | 51 (0)                           | cancer intervention identified and tracked QoL, tailored support and education based on problems | once a month for 24 weeks          | N                       | FF                         | I                 | QoL     | PCQoL, SF-36           | 16,28,48                         |

| Author                               | Country | Cancer type | Sample size (female% of total) | Sample size (female% of intervention) | Sample size (female% of control) | Intervention name                                                                                                                                                         | Intervention's duration                                           | Intervention's provider | Intervention's environment | Intervention type | Outcome | Questionnaire | Time of the measurement in weeks |
|--------------------------------------|---------|-------------|--------------------------------|---------------------------------------|----------------------------------|---------------------------------------------------------------------------------------------------------------------------------------------------------------------------|-------------------------------------------------------------------|-------------------------|----------------------------|-------------------|---------|---------------|----------------------------------|
| Wang, J, et al., 2019 <sup>3</sup>   | China   | liver       | 136 (22)                       | 68 (16)                               | 68 (n/a)                         | comprehensive education and care program                                                                                                                                  | 12 month, weekly different types of intervention                  | N                       | M (FF, T)                  | M (P, G)          | QoL     | EORTC-QLQ-C30 | 48                               |
| Trask, PC, et al. 2003 <sup>4</sup>  | USA     | melanoma    | 48 (71)                        | 25 (68)                               | 23 (74)                          | cognitive-behavioral intervention for distress                                                                                                                            | 3 subsequent 50-minute weekly sessions, over a period of 4 weeks. | HcP                     | FF                         | I                 | QoL     | SF-36         | 8, 24                            |
| Takano, T, et al., 2021 <sup>5</sup> | Japan   | mixed       | 69 (n/a)                       | 31(83)                                | 38 (78)                          | patients received self-help workbooks. investigators including medical oncologists, psychiatrists, and clinical psychologists made the workbook originally for this study | 24 weeks                                                          | SH                      | SH                         | SH                | QoL     | GQOL          | 12                               |
|                                      |         |             |                                |                                       |                                  |                                                                                                                                                                           |                                                                   |                         |                            |                   |         | EORTC QLQ-C30 | 12                               |
|                                      |         |             |                                |                                       |                                  |                                                                                                                                                                           |                                                                   |                         |                            |                   |         | GQOL          | 24                               |
|                                      |         |             |                                |                                       |                                  |                                                                                                                                                                           |                                                                   |                         |                            |                   |         | EORTC QLQ-C30 | 24                               |

| Author                                  | Country | Cancer type | Sample size (female% of total) | Sample size (female% of intervention) | Sample size (female% of control) | Intervention name                                                                                                             | Intervention's duration                                                                                                 | Intervention's provider | Intervention's environment | Intervention type | Outcome | Questionnaire | Time of the measurement in weeks |
|-----------------------------------------|---------|-------------|--------------------------------|---------------------------------------|----------------------------------|-------------------------------------------------------------------------------------------------------------------------------|-------------------------------------------------------------------------------------------------------------------------|-------------------------|----------------------------|-------------------|---------|---------------|----------------------------------|
| McCaughan, E, et al., 2018 <sup>6</sup> | UK      | prostate    | 17 (0)                         | 13 (0)                                | 4 (0)                            | program focused on symptom management, sexual dysfunction, uncertainty management, positive thinking and couple communication | 5 session 2 hours group and 2 session for phone                                                                         | HcP                     | M (FF, T)                  | M (G, P)          | QoL     | FACT-G        | n/a                              |
|                                         |         |             |                                |                                       |                                  |                                                                                                                               |                                                                                                                         |                         |                            |                   |         |               | 4                                |
| Walker, J, et al. 2014 <sup>7</sup>     | UK      | lung        | 142 (65)                       | 68 (65)                               | 74 (65)                          | depression care                                                                                                               | every four weeks for 32 weeks                                                                                           | N                       | FF                         | I                 | QoL     | EORTC-QLQ-C30 | 15                               |
| Zhang, LMM, et al., 2021 <sup>8</sup>   | China   | gastric     | 160 (54)                       | 80 (53)                               | 80 (55)                          | reminiscence therapy                                                                                                          | 60 minutes, twice per month, for 12 consecutive months, patients were given a total of 24 reminiscence therapy sessions | N                       | FF                         | G                 | QoL     | EORTC-QLQ-C30 | 12                               |
|                                         |         |             |                                |                                       |                                  |                                                                                                                               |                                                                                                                         |                         |                            |                   |         |               | 24                               |
|                                         |         |             |                                |                                       |                                  |                                                                                                                               |                                                                                                                         |                         |                            |                   |         |               | 36                               |
|                                         |         |             |                                |                                       |                                  |                                                                                                                               |                                                                                                                         |                         |                            |                   |         |               | 48                               |
| Walker, LG, et al.,1998 <sup>9</sup>    | UK      | breast      | 88 (100)                       | 44 (100)                              | 44 (100)                         | relaxation combined with guided imagery                                                                                       | daily practice based on audio cassette and 40 women received 5 live training                                            | SH                      | SH                         | SH                | QoL     | GQOL          | 15                               |
| Arving, C, et al., 2007 <sup>10</sup>   | Sweden  | breast      | 85 (100)                       | 47 (100)                              | 38 (100)                         | individual psychosocial support                                                                                               | four 3 hours session                                                                                                    | Psy                     | FF                         | I                 | QoL     | EORTC QLQ-C30 | 4                                |
|                                         |         |             |                                |                                       |                                  |                                                                                                                               |                                                                                                                         |                         |                            |                   |         |               | 12                               |

| Author                                     | Country   | Cancer type | Sample size (female% of total) | Sample size (female% of intervention) | Sample size (female% of control) | Intervention name                    | Intervention's duration                                   | Intervention's provider | Intervention's environment | Intervention type | Outcome | Questionnaire | Time of the measurement in weeks |
|--------------------------------------------|-----------|-------------|--------------------------------|---------------------------------------|----------------------------------|--------------------------------------|-----------------------------------------------------------|-------------------------|----------------------------|-------------------|---------|---------------|----------------------------------|
|                                            |           |             |                                |                                       |                                  |                                      |                                                           |                         |                            |                   |         |               | 24                               |
|                                            |           |             |                                |                                       |                                  |                                      |                                                           |                         |                            |                   |         |               | 4                                |
|                                            |           |             |                                |                                       |                                  |                                      |                                                           |                         |                            |                   |         |               | 12                               |
|                                            |           |             |                                |                                       |                                  |                                      |                                                           |                         |                            |                   |         |               | 24                               |
| Liu, T, et al., 2019 <sup>11</sup>         | China     | thyroid     | 102 (n/a)                      | 49 (34)                               | 53 (38)                          | mindfulness-based stress reduction   | 8 session, weekly                                         | Psy                     | FF                         | G                 | QoL     | EORTC-QLQ-C30 | 9                                |
|                                            |           |             |                                |                                       |                                  |                                      |                                                           |                         |                            |                   |         |               | 12                               |
| Lutgendorf, SK, et al., 2010 <sup>12</sup> | USA       | cervical    | 39 (100)                       | 20 (100)                              | 19 (100)                         | relaxation training                  | for 6 weeks, 4 times per week, 20-25 minutes each session | HcP                     | FF                         | G                 | QoL     | FACT          | 4                                |
|                                            |           |             |                                |                                       |                                  |                                      |                                                           |                         |                            |                   |         |               | 6                                |
| Miaskowski, C, et al., 2007 <sup>13</sup>  | USA       | mixed       | 28 (71)                        | 16 (69)                               | 12 (74)                          | psychoeducational intervention       | one academic session                                      | N                       | FF                         | G                 | QoL     | SF-36         | 6                                |
| Lee, YH, et al. 2018 <sup>14</sup>         | Taiwan    | mixed       | 51(89)                         | 25 (92)                               | 26 (85)                          | stress management                    | one time occasion 110 minutes                             | HcP                     | FF                         | I                 | QoL     | FACT-G        | 12                               |
|                                            |           |             |                                |                                       |                                  |                                      |                                                           |                         |                            |                   |         |               | 24                               |
| Hawkes, AL, et al. 2014 <sup>15</sup>      | Australia | colorectal  | 410 (46)                       | 205 (n/a)                             | 205 (n/a)                        | health coaching                      | at least 6 of the 11 session, average length 31,5 min     | HcP                     | T                          | I                 | QOL     | FACT-C        | 24                               |
|                                            |           |             |                                |                                       |                                  |                                      |                                                           |                         |                            |                   |         |               | 48                               |
| Yoo, HJ, et al. 2004 <sup>16</sup>         | Korea     | breast      | 60 (100)                       | 30 (100)                              | 30 (100)                         | guided imagery and muscle relaxation | 6 session                                                 | Psy                     | FF                         | G                 | QoL     | FACT-B        | 12                               |
|                                            |           |             |                                |                                       |                                  |                                      |                                                           |                         |                            |                   |         |               | 24                               |

| Author                                                  | Country   | Cancer type | Sample size (female% of total) | Sample size (female% of intervention) | Sample size (female% of control) | Intervention name                                                     | Intervention's duration                                                             | Intervention's provider | Intervention's environment | Intervention type | Outcome | Questionnaire                               | Time of the measurement in weeks |
|---------------------------------------------------------|-----------|-------------|--------------------------------|---------------------------------------|----------------------------------|-----------------------------------------------------------------------|-------------------------------------------------------------------------------------|-------------------------|----------------------------|-------------------|---------|---------------------------------------------|----------------------------------|
| <b>Klinkhammer-Schalke, M et al., 2012<sup>17</sup></b> | Germany   | breast      | 200 (100)                      | 100 (100)                             | 100 (100)                        | psychotherapy                                                         | n/a                                                                                 | Psy                     | FF                         | I                 | QoL     | EORTC QLQ-C30                               | 12                               |
|                                                         |           |             |                                |                                       |                                  |                                                                       |                                                                                     |                         |                            |                   |         |                                             | 24                               |
|                                                         |           |             |                                |                                       |                                  |                                                                       |                                                                                     |                         |                            |                   |         |                                             | 36                               |
|                                                         |           |             |                                |                                       |                                  |                                                                       |                                                                                     |                         |                            |                   |         |                                             | 48                               |
| <b>Marchioro, G, et al. 1996<sup>18</sup></b>           | Italy     | breast      | 36 (100)                       | 18 (100)                              | 18 (100)                         | cognitive behavioral psychotherapy and family counseling              | during 9 month, weekly 50 minutes session for patients, bimonthly family counseling | Psy                     | FF                         | I                 | QoL     | FLIC                                        | 4                                |
|                                                         |           |             |                                |                                       |                                  |                                                                       |                                                                                     |                         |                            |                   |         |                                             | 12                               |
|                                                         |           |             |                                |                                       |                                  |                                                                       |                                                                                     |                         |                            |                   |         |                                             | 24                               |
|                                                         |           |             |                                |                                       |                                  |                                                                       |                                                                                     |                         |                            |                   |         |                                             | 36                               |
| <b>Walczak, A, et al.,2017<sup>19</sup></b>             | Australia | mixed       | 110 (33)                       | 61 (34)                               | 49 (31)                          | communication support program                                         | one time 45 min session and one time 15 min phone call                              | N                       | M (FF, T)                  | I                 | QoL     | FACT-G                                      | 4                                |
| <b>Petersen, RW, et al.,2002<sup>20</sup></b>           | n/a       | mixed       | 50 (100)                       | 25 (100)                              | 25 (100)                         | progressive muscle relaxation, guided imagery and counseling sessions | one day intervention                                                                | HcP                     | FF                         | I                 | QoL     | GHQ-28                                      | 6                                |
| <b>Vanbutsele, G, et al. 2018<sup>21</sup></b>          | n/a       | mixed       | 186 (n/a)                      | 92 (36)                               | 94 (27)                          | early and systematic integration of palliative care                   | not specified, until death                                                          | HcP                     | FF                         | I                 | QoL     | EORTC QLQ-C30, MQOL Single Item Scale, MQOL | 12                               |
|                                                         |           |             |                                |                                       |                                  |                                                                       |                                                                                     |                         |                            |                   |         |                                             | 18                               |
|                                                         |           |             |                                |                                       |                                  |                                                                       |                                                                                     |                         |                            |                   |         |                                             | 24                               |
|                                                         |           |             |                                |                                       |                                  |                                                                       |                                                                                     |                         |                            |                   |         |                                             | n/a                              |

| Author                                    | Country   | Cancer type | Sample size (female% of total) | Sample size (female% of intervention) | Sample size (female% of control) | Intervention name                                                                                                                    | Intervention's duration                                                                                                                     | Intervention's provider | Intervention's environment | Intervention type | Outcome | Questionnaire | Time of the measurement in weeks |
|-------------------------------------------|-----------|-------------|--------------------------------|---------------------------------------|----------------------------------|--------------------------------------------------------------------------------------------------------------------------------------|---------------------------------------------------------------------------------------------------------------------------------------------|-------------------------|----------------------------|-------------------|---------|---------------|----------------------------------|
| Schofield, P, et al., 2013 <sup>22</sup>  | Australia | lung        | 108 (na)                       | 55 (44)                               | 53 (36)                          | tailored intervention                                                                                                                | two consultation session                                                                                                                    | HcP                     | FF                         | I                 | QoL     | EORTC QLQ-C30 | 8                                |
|                                           |           |             |                                |                                       |                                  |                                                                                                                                      |                                                                                                                                             |                         |                            |                   |         |               | 12                               |
| Qin, X, et al., 2017 <sup>23</sup>        | China     | gastric     | 100 (na)                       | 50 (n/a)                              | 50 ( n/a)                        | active psychological intervention based on routine nursing                                                                           | during hospitalization                                                                                                                      | N                       | FF                         | I                 | QoL     | EORTC QLQ-C30 | n/a                              |
| Zhou, L, et al., 2020 <sup>24</sup>       | China     | ovarian     | 73 (100)                       | 37 (100)                              | 36 (100)                         | at-home cognitive behavioral therapy                                                                                                 | n/a                                                                                                                                         | N                       | M (FF, SH)                 |                   | QoL     | EORTC QLQ-C30 | 12                               |
| Northouse, LL, et al., 2007 <sup>25</sup> | USA       | prostate    | 135 (0)                        | 112 (0)                               | 123 (0)                          | standard care plus a family-based intervention                                                                                       | 4 months: consisted of 3 90-minute home visits and 2x30-minute T sessions spaced 2 weeks apart and delivered between baseline and 4 months. | N                       | M (FF, T)                  | I                 | QoL     | FACT-G, SF-12 | 16                               |
|                                           |           |             |                                |                                       |                                  |                                                                                                                                      |                                                                                                                                             |                         |                            | I                 |         |               | 32                               |
|                                           |           |             |                                |                                       |                                  |                                                                                                                                      |                                                                                                                                             |                         |                            |                   |         |               | 48                               |
| Penedo, FJ, et al., 2020 <sup>26</sup>    | USA       | prostate    | 192 (0)                        | 95 (0)                                | 97 (0)                           | cognitive-behavioral stress management, cognitive-behavioral stress- and self management skills and relaxation                       | 10 weeks 90 min/ session                                                                                                                    | Psy                     | O                          | G                 | QoL     | FACT-G        | 24                               |
|                                           |           |             |                                |                                       |                                  |                                                                                                                                      |                                                                                                                                             |                         |                            |                   |         |               | 48                               |
| Penedo, FJ, et al., 2007 <sup>27</sup>    | USA       | prostate    | 71 (0)                         | 41 (0)                                | 30 (0)                           | cognitive-behavioral stress management - cognitive-behavioral stress- and self management skills and relaxation + half a day seminar | 10x 2 hours/ sessions, once a week                                                                                                          | Psy                     | FF                         | G                 | QoL     | FACT-G        | 12                               |

| Author                                        | Country   | Cancer type | Sample size (female% of total) | Sample size (female% of intervention) | Sample size (female% of control) | Intervention name                                      | Intervention's duration                                                                                                                                                                           | Intervention's provider | Intervention's environment | Intervention type | Outcome | Questionnaire | Time of the measurement in weeks |
|-----------------------------------------------|-----------|-------------|--------------------------------|---------------------------------------|----------------------------------|--------------------------------------------------------|---------------------------------------------------------------------------------------------------------------------------------------------------------------------------------------------------|-------------------------|----------------------------|-------------------|---------|---------------|----------------------------------|
| Rodríguez Vega, B, et al., 2010 <sup>28</sup> | Spain     | mixed       | 72 (81)                        | 39 (87)                               | 33 (73)                          | native therapy                                         | 12x 45 min weekly sessions                                                                                                                                                                        | Psy                     | FF                         | I                 | QoL     | EORTC QLQ-C30 | 12                               |
|                                               |           |             |                                |                                       |                                  |                                                        |                                                                                                                                                                                                   |                         |                            |                   |         |               | 24                               |
| Peoples, AR, et al., 2016 <sup>29</sup>       | USA       | mixed       | 48 (88)                        | 24 (88)                               | 24 (75)                          | cognitive behavior therapy                             | 7 weeks, seven individual weekly CBT-I sessions, with sessions 1, 2, and 4 (30–60 min) conducted in person and sessions 3, 5, 6, and 7 (15–30 min) conducted over the phone                       | Psy                     | M (FF , T)                 | I                 | QoL     | FACT-G        | 7                                |
|                                               |           |             |                                |                                       |                                  |                                                        |                                                                                                                                                                                                   |                         |                            |                   |         |               | 12                               |
| Parker, PA, et al., 2009 <sup>30</sup>        | USA       | prostate    | 75 (0)                         | 39 (0)                                | 36 (0)                           | supportive attention                                   | 2 sessions + 2 booster sessions, 60-90 min each before surgery                                                                                                                                    | Psy                     | FF                         | I                 | QoL     | PCI, SF-36    | 6                                |
|                                               |           |             |                                |                                       |                                  |                                                        |                                                                                                                                                                                                   |                         |                            |                   |         |               | 24                               |
|                                               |           |             |                                |                                       |                                  |                                                        |                                                                                                                                                                                                   |                         |                            |                   |         |               | 48                               |
| Parker, PA, et al., 2009 <sup>30</sup>        | USA       | prostate    | 75 (0)                         | 39 (0)                                | 36 (0)                           | cognitive behavioral stress management                 | 2 sessions + 2 booster sessions, 60-90 min each before surgery                                                                                                                                    | Psy                     | FF                         | I                 | QoL     | PCI, SF-36    | 6                                |
|                                               |           |             |                                |                                       |                                  |                                                        |                                                                                                                                                                                                   |                         |                            |                   |         |               | 24                               |
|                                               |           |             |                                |                                       |                                  |                                                        |                                                                                                                                                                                                   |                         |                            |                   |         |               | 48                               |
| van de Wal, M, et al., 2017 <sup>31</sup>     | Australia | mixed       | 88 (53)                        | 48 (53)                               | 43 (53)                          | cognitive behavior therapy for high fear of recurrence | 12 weeks, five individual 1-hour FF sessions (sessions 1-3, 5, and 8) combined with three 15-minute e-consultations (chat application, no video) with access to a Web site (sessions 4, 6, and 7) | Psy                     | M (O, FF)                  | I                 | QoL     | EORTC QLQ-C30 | 12                               |



| Author                                  | Country | Cancer type    | Sample size (female% of total) | Sample size (female% of intervention) | Sample size (female% of control) | Intervention name                                                                       | Intervention's duration                                                                                                                                                                                                                                                                                                                                                                        | Intervention's provider | Intervention's environment | Intervention type | Outcome | Questionnaire               | Time of the measurement in weeks |
|-----------------------------------------|---------|----------------|--------------------------------|---------------------------------------|----------------------------------|-----------------------------------------------------------------------------------------|------------------------------------------------------------------------------------------------------------------------------------------------------------------------------------------------------------------------------------------------------------------------------------------------------------------------------------------------------------------------------------------------|-------------------------|----------------------------|-------------------|---------|-----------------------------|----------------------------------|
| Serfaty M, et al., 2018 <sup>32</sup>   | US      | mixed          | 42 (74)                        | 20 (70)                               | 22 (77)                          | acceptance and commitment therapy                                                       | 8 sessions for 3 months, 1 hour/ session                                                                                                                                                                                                                                                                                                                                                       | Psy                     | FF                         | I                 | QoL     | FACT-G, EQ-5D-VAS, 5Q-5D-5L | 12                               |
|                                         |         |                |                                |                                       |                                  |                                                                                         |                                                                                                                                                                                                                                                                                                                                                                                                |                         |                            |                   |         |                             | 18                               |
|                                         |         |                |                                |                                       |                                  |                                                                                         |                                                                                                                                                                                                                                                                                                                                                                                                |                         |                            |                   |         |                             | 24                               |
| Sandsund, C, et al., 2017 <sup>33</sup> | UK      | gynaecological | 142 (100)                      | 72 (100)                              | 70 (100)                         | consultation with professional familiar with behavioral change, collaborative care plan | 3 months, number of sessions not specified                                                                                                                                                                                                                                                                                                                                                     | HcP                     | M (FF, T)                  | I                 | QoL     | EORTC QLQ-C30, SF-36        | 12                               |
|                                         |         |                |                                |                                       |                                  |                                                                                         |                                                                                                                                                                                                                                                                                                                                                                                                |                         |                            |                   |         |                             | 24                               |
| Wu, DY, et al., 2016 <sup>34</sup>      | China   | thyroid        | 60 (75)                        | 30 (73)                               | 30 (77)                          | psychological and behavioral intervention -                                             | 1 year, sessions not specified                                                                                                                                                                                                                                                                                                                                                                 | N                       | M (P, O)                   | M (I, G)          | QoI     | EORTC QLQ-C30               | 48                               |
| Rodin, G, et al., 2019 <sup>35</sup>    | USA     | leukemia       | 42 (38)                        | 22 (36)                               | 20 (40)                          | psychotherapeutic intervention                                                          | 8–12 psychotherapeutic sessions, approx. 30–60 min each, delivered over 8 weeks, the first 8 sessions occur once or twice weekly during hospitalization (typically 1 month), adjusted in terms of frequency and duration depending on the patient's ability to participate. The remaining 4 sessions occur weekly or bi-weekly after discharge, in coordination with outpatient clinic visits. | HcP                     | FF                         | I                 | QoL     | FACIT-Sp                    | 4                                |
|                                         |         |                |                                |                                       |                                  |                                                                                         |                                                                                                                                                                                                                                                                                                                                                                                                |                         |                            |                   |         |                             | 8                                |
|                                         |         |                |                                |                                       |                                  |                                                                                         |                                                                                                                                                                                                                                                                                                                                                                                                |                         |                            |                   |         |                             | 12                               |

| Author                                     | Country | Cancer type | Sample size (female% of total) | Sample size (female% of intervention) | Sample size (female% of control) | Intervention name                                                                                                                                                                                                                                               | Intervention's duration                                                                                                      | Intervention's provider | Intervention's environment | Intervention type | Outcome | Questionnaire | Time of the measurement in weeks |
|--------------------------------------------|---------|-------------|--------------------------------|---------------------------------------|----------------------------------|-----------------------------------------------------------------------------------------------------------------------------------------------------------------------------------------------------------------------------------------------------------------|------------------------------------------------------------------------------------------------------------------------------|-------------------------|----------------------------|-------------------|---------|---------------|----------------------------------|
| Zhou, J, et al., 2020 <sup>36</sup>        | China   | leukemia    | 118 (58)                       | 59 (59)                               | 59 (56)                          | ,disease-related health education, catheterization management, psychological counseling                                                                                                                                                                         | not specified - during the hospitalization period                                                                            | N                       | FF                         | I                 | QoL     | SF-36         | n/a                              |
| Thomas, ML, et al., 2012 <sup>37</sup>     | USA     | mixed       | 152 (13)                       | 64 (16)                               | 88 (10)                          | coaching - education (video for managing cancer pain, overcoming attitudinal barriers pamphlet) + motivational interviewing - exploring beliefs about pain, use of analgesics, nonpharmacologic pain management strategies, communication about pain management | 4 x 30 minutes telephone call                                                                                                | N                       | T                          | I                 | QoL     | FACT-G, SF-36 | 12                               |
| Rodríguez, C.F. et al., 2014 <sup>38</sup> | Spain   | lung        | 90 (17)                        | 40 (26)                               | 50 (10)                          | behavior activation                                                                                                                                                                                                                                             | 4 x 60 min sessions                                                                                                          | Psy                     | FF                         | I                 | QoL     | EORTC QLQ-C30 | n/a                              |
| Fann, JR, et al., 2009 <sup>39</sup>       | USA     | mixed       | 215 (60)                       | 112 (63)                              | 103 (58)                         | depression management                                                                                                                                                                                                                                           | 6 to 8 sessions for up to 12 months. the first treatment session lasts one hour, with subsequent sessions lasting 30 minutes | HcP                     | FF                         | I                 | QoL     | 1-10 scale    | 12                               |
|                                            |         |             |                                |                                       |                                  |                                                                                                                                                                                                                                                                 |                                                                                                                              |                         |                            |                   |         |               | 24                               |
|                                            |         |             |                                |                                       |                                  |                                                                                                                                                                                                                                                                 |                                                                                                                              |                         |                            |                   |         |               | 48                               |
|                                            |         |             |                                |                                       |                                  |                                                                                                                                                                                                                                                                 |                                                                                                                              |                         |                            |                   |         |               | 72                               |

| Author                                          | Country | Cancer type | Sample size (female% of total) | Sample size (female% of intervention) | Sample size (female% of control) | Intervention name                          | Intervention's duration                                                                           | Intervention's provider | Intervention's environment | Intervention type | Outcome | Questionnaire   | Time of the measurement in weeks |
|-------------------------------------------------|---------|-------------|--------------------------------|---------------------------------------|----------------------------------|--------------------------------------------|---------------------------------------------------------------------------------------------------|-------------------------|----------------------------|-------------------|---------|-----------------|----------------------------------|
|                                                 |         |             |                                |                                       |                                  |                                            |                                                                                                   |                         |                            |                   |         |                 | 96                               |
| Ohlson-Nevo, EO, et al., 2015 <sup>40</sup>     | Sweden  | mixed       | 80 (37)                        | 44 (42)                               | 36 (32)                          | education and psychological                | once a week for seven weeks, each time 60 minutes of lecture followed by 60 minutes of discussion | N                       | FF                         | G                 | QoL     | SF-36           | 4                                |
|                                                 |         |             |                                |                                       |                                  |                                            |                                                                                                   |                         |                            |                   |         |                 | 24                               |
|                                                 |         |             |                                |                                       |                                  |                                            |                                                                                                   |                         |                            |                   |         |                 | 48                               |
| Antoni, MH, et al., 2006 <sup>41</sup>          | USA     | breast      | 199 (100)                      | 92 (100)                              | 107 (100)                        | cognitive behavior therapy                 | once a week, for 2 hours, for 10 weeks                                                            | Psy                     | FF                         | G                 | QoL     | POSM            | 24                               |
|                                                 |         |             |                                |                                       |                                  |                                            |                                                                                                   |                         |                            |                   |         |                 | 48                               |
| Ashing, KT, et al., 2019 <sup>42</sup>          | USA     | breast      | 40 (100)                       | 20 (100)                              | 20 (100)                         | cognitive-behavioral                       | 30-40 minutes sessions with a booster session 1 month after complication of phone sessions        | HcP                     | T                          | I                 | QoL     | FACT-G          | 16                               |
| Esplen MJ, et al., 2018 <sup>43</sup>           | Canada  | breast      | 194 (100)                      | 131 (100)                             | 63 (100)                         | cognitive behavior therapy                 | once a week for 90 min                                                                            | Psy                     | FF                         | G                 |         | FACT-BC, FACT-G | 8                                |
|                                                 |         |             |                                |                                       |                                  |                                            |                                                                                                   |                         |                            |                   |         |                 | 24                               |
|                                                 |         |             |                                |                                       |                                  |                                            |                                                                                                   |                         |                            |                   | 48      |                 |                                  |
| Burns DS, et al., 2001 <sup>44</sup>            | USA     | mixed       | 8 (100)                        | 4 (100)                               | 4 (100)                          | bonny method of GIM                        | once a week for ten weeks, for one to two hours                                                   | Psy                     | FF                         | I                 | QoL     | QoL-CV          | 10                               |
|                                                 |         |             |                                |                                       |                                  |                                            |                                                                                                   |                         |                            |                   |         |                 | 16                               |
| Dos Santos, M, et al., 2020 <sup>45</sup>       | France  | mixed       | 167 (96)                       | 48 (n/a)                              | 51 (n/a)                         | computer-assisted cognitive rehabilitation | 9 standardized sessions (45-60 minutes) over 3 months                                             | Psy                     | FF                         | I                 | QoL     | FACT-G          | 12                               |
| Gaston-Johansson, F, et al., 2011 <sup>46</sup> | USA     | breast      | 73 (100)                       | 38 (100)                              | 35 (100)                         | comprehensive coping strategy program      | 1.5 hour session with additional 5 follow ups for 20 minutes each time                            | HcP                     | FF                         | I                 | QoL     | QOLI-CV         | 48                               |

| Author                                | Country     | Cancer type | Sample size (female% of total) | Sample size (female% of intervention) | Sample size (female% of control) | Intervention name                                                                                      | Intervention's duration                        | Intervention's provider | Intervention's environment | Intervention type | Outcome | Questionnaire        | Time of the measurement in weeks |
|---------------------------------------|-------------|-------------|--------------------------------|---------------------------------------|----------------------------------|--------------------------------------------------------------------------------------------------------|------------------------------------------------|-------------------------|----------------------------|-------------------|---------|----------------------|----------------------------------|
| Garssen B, et al., 2012 <sup>47</sup> | Netherlands | breast      | 70 (100)                       | 34 (100)                              | 36 (100)                         | stress management training                                                                             | 4 sessions of 45-60 minutes each               | Psy                     | FF                         | I                 | QoL     | EORTC QLQ-C30        | 2                                |
|                                       |             |             |                                |                                       |                                  |                                                                                                        |                                                |                         |                            |                   |         |                      | 5                                |
|                                       |             |             |                                |                                       |                                  |                                                                                                        |                                                |                         |                            |                   |         |                      | 4                                |
|                                       |             |             |                                |                                       |                                  |                                                                                                        |                                                |                         |                            |                   |         |                      | 13                               |
| Hall S, et al., 2011 <sup>48</sup>    | UK          | mixed       | 45 (51)                        | 22 (59)                               | 23 (43)                          | dignity therapy: a brief palliative care Psychotherapy                                                 | not sure (maybe 30-60 minutes) of 1 session    | Psy                     | FF                         | I                 | QoL     | EQ-5D, QoL           | 1                                |
|                                       |             |             |                                |                                       |                                  |                                                                                                        |                                                |                         |                            |                   |         |                      | 4                                |
| Nápoles AM, et al. 2015 <sup>49</sup> | USA         | breast      | 151 (100)                      | 76 (100)                              | 75 (100)                         | cognitive-behavioral stress management program integrating evidence-based and community best practices | eight weekly, 90 minute sessions               | Peer                    | FF                         | I                 | QoL     | FACT-B               | 12                               |
|                                       |             |             |                                |                                       |                                  |                                                                                                        |                                                |                         |                            |                   |         |                      | 24                               |
| Gao Q, et al. 2020 <sup>50</sup>      | China       | gastric     | 80 (22)                        | 40 (18)                               | 40 (28)                          | health education intervention program                                                                  | N/A                                            | N                       | FF                         | I                 | QoL     | EORTC QLQ-STO22      | 4                                |
| Dieng M, et al. 2020 <sup>51</sup>    | Australia   | skin        | 151 (45)                       | 70 (29)                               | 81 (59)                          | psychological intervention designed to reduce fear of cancer recurrence                                | 3 sessions within a 4-week period              | M (SH, Psy)             | M (SH, T)                  | M (I, SH)         | QoL     | AQoL-8D              | 26                               |
|                                       |             |             |                                |                                       |                                  |                                                                                                        |                                                |                         |                            |                   |         |                      | 48                               |
| Karlsen RV et al., 2021 <sup>52</sup> | Denmark     | prostate    | 35 (0)                         | 16 (0)                                | 19 (0)                           | n/a                                                                                                    | up to six one hours couple counseling sessions | HcP                     | FF                         | I                 | QoL     | SF-36 PCS, SF-36 MCS | 32                               |
|                                       |             |             |                                |                                       |                                  |                                                                                                        |                                                |                         |                            |                   |         |                      | 48                               |
|                                       | Netherlands | glioma      | 89 (58)                        | 45 (58)                               | 44 (59)                          | self help course                                                                                       |                                                | HcP                     | O                          | I                 | QoL     |                      | 6                                |

| Author                                       | Country     | Cancer type | Sample size (female% of total) | Sample size (female% of intervention) | Sample size (female% of control) | Intervention name                              | Intervention's duration                                                                                                                                 | Intervention's provider | Intervention's environment | Intervention type | Outcome | Questionnaire        | Time of the measurement in weeks |
|----------------------------------------------|-------------|-------------|--------------------------------|---------------------------------------|----------------------------------|------------------------------------------------|---------------------------------------------------------------------------------------------------------------------------------------------------------|-------------------------|----------------------------|-------------------|---------|----------------------|----------------------------------|
| Boele FW, et al., 2017 <sup>53</sup>         |             |             |                                |                                       |                                  |                                                | 5 weeks online guided self help course with an online support from a coach                                                                              |                         |                            |                   |         | SF-36 PCS, SF-36 MCS | 12                               |
| Braeken APB, et al. 2013 <sup>54</sup>       | Netherlands | mixed       | 280 (n/a)                      | 136 (n/a)                             | 144 (n/a)                        | n/a                                            | during treatment                                                                                                                                        | HcP                     | FF                         | I                 | QoL     | EORTC QLQ-C30        | 12                               |
|                                              |             |             |                                |                                       |                                  |                                                |                                                                                                                                                         |                         |                            |                   |         |                      | 48                               |
| Cheung YL, et al. 2002 <sup>55</sup>         | Hong kong   | colorectal  | 59 (32)                        | 29 (33)                               | 30 (31)                          | progressive muscle relaxation training (PMRT)  | PMRT practice at home for 2-3 times a week for 10 weeks. before starting a teaching sessions face to face, and audiocassette for a routine PMRT session | HcP                     | FF                         | I                 | QoL     | WHO-QOL              | 5                                |
|                                              |             |             |                                |                                       |                                  |                                                |                                                                                                                                                         |                         |                            |                   |         |                      | 10                               |
| Van Der Hout, AVD, et al. 2019 <sup>56</sup> | Netherlands | mixed       | 624 (51)                       | 320 (49)                              | 304 (52)                         | web-based eHealth application Oncokompas       | n/a                                                                                                                                                     | SH                      | SH                         | SH                | QoL     | HRQOL                | 1                                |
|                                              |             |             |                                |                                       |                                  |                                                |                                                                                                                                                         |                         |                            |                   |         |                      | 12                               |
|                                              |             |             |                                |                                       |                                  |                                                |                                                                                                                                                         |                         |                            |                   |         |                      | 24                               |
| Ham, K, et al. 2019 <sup>57</sup>            | South korea | mixed       | 42 (86)                        | 21 (86)                               | 21(86)                           | app-based cognitive behavioral therapy program | 1 session per day for 10 weeks at home, excluding weekends, composed of 48 sessions which takes approximately 10–15 min to complete.                    | SH                      | O                          | I                 | QoL     | SF-36                | 10                               |
| Ding, K, et al. 2020 <sup>58</sup>           | China       | breast      | 74 (100)                       | 34 (100)                              | 40 (100)                         | n/a                                            | 3 to 6 sessions of individual therapy, each lasting 30 minutes                                                                                          | HcP                     | FF                         | I                 | QoL     | FACT-B, FACT-Cog     | 4                                |

| Author                                           | Country   | Cancer type | Sample size (female% of total) | Sample size (female% of intervention) | Sample size (female% of control) | Intervention name                                                        | Intervention's duration                                                                                                                           | Intervention's provider | Intervention's environment | Intervention type | Outcome | Questionnaire              | Time of the measurement in weeks |
|--------------------------------------------------|-----------|-------------|--------------------------------|---------------------------------------|----------------------------------|--------------------------------------------------------------------------|---------------------------------------------------------------------------------------------------------------------------------------------------|-------------------------|----------------------------|-------------------|---------|----------------------------|----------------------------------|
| Fillion, L, et al. 2008 <sup>59</sup>            | Canada    | breast      | 87 (100)                       | 44 (100)                              | 43 (100)                         | psychoeducation and physical activity                                    | 4 weekly group meetings of 2.5 hours ( 1,5 hours psychoeducative and 1 hour walking training) and 1x session(5-15 minutes)                        | N                       | M (FF, T)                  | G                 | QoL     | SF-12                      | 4                                |
|                                                  |           |             |                                |                                       |                                  |                                                                          |                                                                                                                                                   |                         |                            |                   |         |                            | 12                               |
| Gonzalez-Hernandez, E, et al. 2018 <sup>60</sup> | Spain     | breast      | 56 (100)                       | 28 (100)                              | 28 (100)                         | cognitively-based compassion training exercises, and guided meditations. | 8 weeks, weekly 2 hour session                                                                                                                    | Psy                     | FF                         | G                 | QoL     | FACT-B                     | 8                                |
|                                                  |           |             |                                |                                       |                                  |                                                                          |                                                                                                                                                   |                         |                            |                   |         |                            | 24                               |
| Breitbart, W, et al. 2018 <sup>61</sup>          | USA       | mixed       | 168 (75)                       | 94 (74)                               | 74 (75)                          | individual meaning-centered psychotherapy                                | 7                                                                                                                                                 | HcP                     | FF                         | I                 | QoL     | MQOL                       | 4                                |
|                                                  |           |             |                                |                                       |                                  |                                                                          |                                                                                                                                                   |                         |                            |                   |         |                            | 8                                |
|                                                  |           |             |                                |                                       |                                  |                                                                          |                                                                                                                                                   |                         |                            |                   |         |                            | 16                               |
| Breitbart, W, et al. 2018 <sup>61</sup>          | USA       | mixed       | 160 (70)                       | 86 (66)                               | 74 (75)                          | supportive psychotherapy (SP)                                            | 7                                                                                                                                                 | HcP                     | FF                         | G                 | QoL     | MQOL                       | 4                                |
|                                                  |           |             |                                |                                       |                                  |                                                                          |                                                                                                                                                   |                         |                            |                   |         |                            | 8                                |
|                                                  |           |             |                                |                                       |                                  |                                                                          |                                                                                                                                                   |                         |                            |                   |         |                            | 16                               |
| van der Meulen, IC, et al., 2013 <sup>62</sup>   | Germany   | mixed       | 179 (30)                       | 88 (30)                               | 91 (30)                          | problem-focused and patient driven counseling                            | maximum of six counseling sessions of 45–60 min every 2 months over a period of 1 year, starting 6 weeks after the completion of cancer treatment | N                       | FF                         | I                 | QoL     | EORTC QLQ-C30              | 48                               |
| Turner, J, et al., 2016 <sup>63</sup>            | Australia | mixed       | 469 (70)                       | 247 (74)                              | 222 (66)                         | supportive sessions                                                      | four individual sessions, each up to a 30-min duration                                                                                            | HcP                     | M (FF, T)                  | I                 | QoL     | EQ-5D-5L, SCNS-S34, FACT-G | 10                               |
|                                                  |           |             |                                |                                       |                                  |                                                                          |                                                                                                                                                   |                         |                            |                   |         | SCNS-S34                   |                                  |

| Author                                    | Country   | Cancer type   | Sample size (female% of total) | Sample size (female% of intervention) | Sample size (female% of control) | Intervention name                          | Intervention's duration                              | Intervention's provider | Intervention's environment | Intervention type | Outcome | Questionnaire       | Time of the measurement in weeks |
|-------------------------------------------|-----------|---------------|--------------------------------|---------------------------------------|----------------------------------|--------------------------------------------|------------------------------------------------------|-------------------------|----------------------------|-------------------|---------|---------------------|----------------------------------|
|                                           |           |               |                                |                                       |                                  |                                            |                                                      |                         |                            |                   |         | FACT-G              |                                  |
| Reese, JB, et al., 2021 <sup>64</sup>     | USA       | breast        | 144 (100)                      | 73 (100)                              | 71(100)                          | multimedia intervention                    | n/a                                                  | Psy                     | FF                         | I                 | QOL     | FACT-Q              | 8                                |
| Powell, CB, et al., 2008 <sup>65</sup>    | USA       | gynecological | 64 (100)                       | 21 (100)                              | 43 (100)                         | counselling                                | one-time intervention                                | Psy                     | FF                         | I                 | QOL     | FACIT               | 12                               |
| Nikbakhsh, N, et al., 2018 <sup>66</sup>  | Iran      | breast        | 40 (100)                       | 20 (100)                              | 20 (100)                         | supportive therapy                         | weekly for 8 weeks, each 45 min                      | Psy                     | FF                         | G                 | QoL     | WHO-QOL-BREF        | 12                               |
| Fang, P, et al., 2020 <sup>67</sup>       | China     | gastric       | 120 (40)                       | 60 (40)                               | 60 (40)                          | supportive care and humanistic care        | 3x40 min during hospital stay                        | N                       | FF                         | I                 | QOL     | n/a                 | 4                                |
| Mihuta, ME, et al., 2018 <sup>68</sup>    | Australia | mixed         | 65 (100)                       | 32 (100)                              | 33 (100)                         | cognitive behavioral therapy               | 4 session (1 per week)                               | HcP                     | O                          | G                 | QOL     | FACT-Cog, EORTC-QLQ | 4                                |
| McLachlan, SA, et al., 2001 <sup>69</sup> | Australia | mixed         | 450 (41)                       | 296 (n/a)                             | 154 (n/a)                        | consultation                               | average 15 minute session, only one session          | N                       | FF                         | I                 | QOL     | EORTC QLQ-C30       | 24                               |
| Edmonds et al., 1999 <sup>70</sup>        | Canada    | breast        | 66 (100)                       | 30 (100)                              | 36 (100)                         | psychoeducation                            | 2 h per week/35 weeks                                | HcP                     | FF                         | G                 | QOL     | FLIC                | 54                               |
| Li, J, et al., 2019 <sup>71</sup>         | China     | colorectal    | 498 (n/a)                      | 249 (n/a)                             | 249 (n/a)                        | health education, psychological counseling | n/a                                                  | N                       | T                          | I                 | QoL     | QLQ-C30             | 12                               |
| Elyasi, F, et al., 2021 <sup>72</sup>     | Iran      | breast        | 30 (100)                       | 15 (100)                              | 15 (100)                         | CBT or hypnosis                            | 8x one-hour treatment sessions                       | HcP                     | FF                         | I                 | QoL     | EORTC – BR 23       | 24                               |
|                                           |           |               |                                |                                       |                                  | hypnosis only                              |                                                      |                         |                            |                   |         |                     |                                  |
| Ferguson, RJ, et al., 2012 <sup>73</sup>  | USA       | breast        | 40 (100)                       | 19 (100)                              | 21 (100)                         | brief cognitive behavioral therapy         | four biweekly individual office visits 30–50 minutes | HcP                     | FF                         | I                 | QoL     | QOL-CS              | 8                                |

| Author                                         | Country     | Cancer type | Sample size (female% of total) | Sample size (female% of intervention) | Sample size (female% of control) | Intervention name                                                              | Intervention's duration                                                                                                                                                                | Intervention's provider | Intervention's environment | Intervention type | Outcome | Questionnaire         | Time of the measurement in weeks |
|------------------------------------------------|-------------|-------------|--------------------------------|---------------------------------------|----------------------------------|--------------------------------------------------------------------------------|----------------------------------------------------------------------------------------------------------------------------------------------------------------------------------------|-------------------------|----------------------------|-------------------|---------|-----------------------|----------------------------------|
| Willems, R, et al., 2016 <sup>74</sup>         | Netherlands | mixed       | 409 (81)                       | 188 (81)                              | 221 (81)                         | psychosocial support through a website                                         | four components divided over two sessions                                                                                                                                              | SH                      | SH                         | SH                | QoL     | EORTC QLQ-C30         | 24                               |
| Wu, Q, et al., 2021 <sup>75</sup>              | China       | breast      | 86 (100)                       | 43 (100)                              | 43 (100)                         | WeChat, psychological counseling                                               | 3 months                                                                                                                                                                               | N                       | O                          | I                 | QoL     | SF-36                 | 12                               |
| Yun et al., 2017 <sup>76</sup>                 | South Korea | mixed       | 206 (80)                       | 134 (82)                              | 72 (75)                          | health education, leadership, and coaching education, leadership, and coaching | 16 sessions of tele-coaching were conducted: 30 min per week for 12 sessions, 30 min per 2 weeks for 2 sessions, and 30 min per month for 2 sessions were offered for the intervention | HcP                     | T                          | I                 | QoL     | EORTC QLQ-C30         | 48                               |
| Zhao, X, et al., 2021 <sup>77</sup>            | China       | glioma      | 103 (n/a)                      | 52 (n/a)                              | 51 (n/a)                         | cognitive behavioral therapy                                                   | twice a week                                                                                                                                                                           | N                       | FF                         | I                 | QoL     | QLQ-C30               | 12                               |
| Zhao, X, et al., 2015 <sup>78</sup>            | China       | lung        | 124 (n/a)                      | 62 (n/a)                              | 62 (n/a)                         | supportive psychological intervention                                          | n/a                                                                                                                                                                                    | N                       | FF                         | I                 | QoL     | QLQ-C30               | 0,3                              |
| Rosen, KD, et al., 2018 <sup>79</sup>          | USA         | breast      | 112 (100)                      | 57 (100)                              | 55 (100)                         | mindfulness                                                                    | training fully accessible                                                                                                                                                              | SH                      | SH                         | SH                | QoL     | FACT-B                | 5                                |
| Ruiz-Vozmediano, J, et al., 2020 <sup>80</sup> | Spain       | breast      | 63 (100)                       | 31 (100)                              | 32 (100)                         | mindfulness                                                                    | twice-weekly 90-minute session                                                                                                                                                         | Psy                     | FF                         | G                 | QoL     | EORTC QLQ-C30         | 24                               |
| Von Ah, D, et al., 2012 <sup>81</sup>          | USA         | breast      | 89 (100)                       | n/a (100)                             | n/a (100)                        | memory training to improve cognitive functions                                 | 10x1-hour training session, over 6-8 weeks                                                                                                                                             | HcP                     | FF                         | G                 | QoL     | QOL-CS, QOL-CV, SF-36 | 8                                |



| Author                                          | Country   | Cancer type | Sample size (female% of total) | Sample size (female% of intervention) | Sample size (female% of control) | Intervention name                                           | Intervention's duration                                                                                                                                                                                                                                                                       | Intervention's provider | Intervention's environment | Intervention type | Outcome | Questionnaire      | Time of the measurement in weeks |
|-------------------------------------------------|-----------|-------------|--------------------------------|---------------------------------------|----------------------------------|-------------------------------------------------------------|-----------------------------------------------------------------------------------------------------------------------------------------------------------------------------------------------------------------------------------------------------------------------------------------------|-------------------------|----------------------------|-------------------|---------|--------------------|----------------------------------|
|                                                 |           |             |                                |                                       |                                  | speed of processing training to improve cognitive functions |                                                                                                                                                                                                                                                                                               |                         |                            |                   |         |                    |                                  |
| <b>Lengacher, CA, et al., 2009<sup>82</sup></b> | USA       | breast      | 82 (100)                       | 40 (100)                              | 42 (100)                         | mindfulness-based stress reduction                          | weekly 2-hours session                                                                                                                                                                                                                                                                        | Psy                     | FF                         | G                 | QoL     | SF-36              | 6                                |
| <b>Beatty, L. et al. 2015<sup>83</sup></b>      | Australia | mixed       | 60 (95)                        | 30 (90)                               | 30 (100)                         | self-guided Web-based cognitive behavior, cancer coping     | once a week, six weeks                                                                                                                                                                                                                                                                        | HcP                     | O                          | I                 | QoL     | EORTC-QLQ-C30      | 6                                |
|                                                 |           |             |                                |                                       |                                  |                                                             |                                                                                                                                                                                                                                                                                               |                         |                            |                   |         |                    | 13,03                            |
|                                                 |           |             |                                |                                       |                                  |                                                             |                                                                                                                                                                                                                                                                                               |                         |                            |                   |         |                    | 26,07                            |
| <b>Chu, X. et al, 2020<sup>84</sup></b>         | China     | breast      | 84 (100)                       | 42 (100)                              | 42 (100)                         | mindfulness-based cognitive therapy (MBCT)                  | MBCT training for 8 weeks, 2 hours per week homework for each class, which takes 20 to 45 min to complete every day.                                                                                                                                                                          | HcP                     | FF                         | I                 | QoL     | FACT-G             | 8                                |
|                                                 |           |             |                                |                                       |                                  |                                                             |                                                                                                                                                                                                                                                                                               |                         |                            |                   |         |                    | 12                               |
| <b>Berglund, G. et al. 2007<sup>85</sup></b>    | Sweden    | prostate    | 189 (0)                        | 39 (0)                                | 150 (0)                          | "Between Men" programme                                     | seven weekly sessions (60 minutes)                                                                                                                                                                                                                                                            | HcP                     | FF                         | G                 | QoL     | EORTC QLQ-C30      | 48                               |
| <b>Dirksen, S. et al, 2007<sup>86</sup></b>     | USA       | breast      | 72 (100)                       | 34 (100)                              | 38 (100)                         | cognitive behavioral therapy                                | Total Ten weeks; 2-week pre-treatment; a 6-week treatment four times per week; 2-week post-treatment-conducted through individual weekly phone sessions. The first class was approximately 2 hours in length, the remaining three classes were an hour or less, and the phone sessions lasted | N                       | T                          | I                 | QoL     | FACT-G, FACT-B SWB | 10                               |

| Author                                        | Country     | Cancer type | Sample size (female% of total) | Sample size (female% of intervention) | Sample size (female% of control) | Intervention name                          | Intervention's duration                                                                         | Intervention's provider | Intervention's environment | Intervention type | Outcome | Questionnaire  | Time of the measurement in weeks |
|-----------------------------------------------|-------------|-------------|--------------------------------|---------------------------------------|----------------------------------|--------------------------------------------|-------------------------------------------------------------------------------------------------|-------------------------|----------------------------|-------------------|---------|----------------|----------------------------------|
|                                               |             |             |                                |                                       |                                  |                                            | approximately 15 minutes.                                                                       |                         |                            |                   |         |                |                                  |
| Dolbeault, S. et al. 2008 <sup>87</sup>       | France      | breast      | 168 (100)                      | 81 (100)                              | 87 (100)                         | psychoeducational intervention             | once a week (2hrs) for eight weeks                                                              | Psy                     | FF                         | G                 | QoL     | EORTC QLQ-C30  | 1                                |
|                                               |             |             |                                |                                       |                                  |                                            |                                                                                                 |                         |                            |                   |         |                | 4                                |
| Aranda, S. et al 2006 <sup>88</sup>           | Australia   | breast      | 60 (100)                       | 30 (100)                              | 30 (100)                         | psychoeducational intervention             | once a week, 1.5 hours (1 hour meeting and 30 min call)                                         | N                       | M (FF, T)                  | I                 | QoL     | EORTC QLQ-30   | 4                                |
|                                               |             |             |                                |                                       |                                  |                                            |                                                                                                 |                         |                            |                   |         |                | 13                               |
| Baoyindeliger, L.Z. et al. 2020 <sup>89</sup> | China       | esophageal  | 130 (n/a)                      | 65 (34)                               | 65 (30)                          | psychological nursing care intervention    | n/a                                                                                             | N                       | FF                         | I                 | QoL     | SF-36          | 2                                |
| Armes, J. et al. 2007 <sup>90</sup>           | UK          | mixed       | 53 (60)                        | 26 (64)                               | 27 (56)                          | psychoeducational intervention             | 3 occasions 1 hour                                                                              | HcP                     | FF                         | I                 | QoL     | EORTC QLQ- C30 | n/a                              |
|                                               |             |             |                                |                                       |                                  |                                            |                                                                                                 |                         |                            |                   |         |                | 4                                |
|                                               |             |             |                                |                                       |                                  |                                            |                                                                                                 |                         |                            |                   |         |                | 39                               |
| Compen F. et al, 2018 <sup>91</sup>           | Netherlands | mixed       | 155 (86)                       | 77 (43)                               | 78 (43)                          | Mindfulness-based cognitive therapy (MBCT) | eight weekly 2.5-hour group sessions + a 6-hour silent day, and daily home practice assignments | Psy                     | FF                         | G                 | QoL     | SF-12          | 8                                |
|                                               |             |             |                                |                                       |                                  | (eMBCT) individual internet-based MBCT     |                                                                                                 |                         | O                          | I                 |         |                |                                  |
|                                               | Australia   | prostate    | 331 (0)                        | 165 (0)                               | 166 (0)                          | consultations                              |                                                                                                 | N                       | FF                         | G                 | QoL     | EPIC-26        | 7                                |

| Author                                     | Country | Cancer type | Sample size (female% of total) | Sample size (female% of intervention) | Sample size (female% of control) | Intervention name                     | Intervention's duration                                                                                                     | Intervention's provider | Intervention's environment | Intervention type | Outcome | Questionnaire | Time of the measurement in weeks |
|--------------------------------------------|---------|-------------|--------------------------------|---------------------------------------|----------------------------------|---------------------------------------|-----------------------------------------------------------------------------------------------------------------------------|-------------------------|----------------------------|-------------------|---------|---------------|----------------------------------|
| Schofield, P, et al., 2016 <sup>92</sup>   |         |             |                                |                                       |                                  |                                       | beginning of treatment (week 1), mid-treatment (week 4), treatment completion (week 7) and 6-weeks post-treatment (week 13) |                         |                            |                   |         |               | 24                               |
| Hauffman, A, et al., 2020 <sup>93</sup>    | Sweden  | mixed       | 245 (71)                       | 124 (75)                              | 121 (67)                         | psychoeducative lectures              | continuous access for the material                                                                                          | M (HcP, SH)             | SH                         | SH                | QoL     | EORTC QLQ-C30 | 4                                |
|                                            |         |             |                                |                                       |                                  |                                       |                                                                                                                             |                         |                            |                   |         |               | 16                               |
|                                            |         |             |                                |                                       |                                  |                                       |                                                                                                                             |                         |                            |                   |         |               | 28                               |
|                                            |         |             |                                |                                       |                                  |                                       |                                                                                                                             |                         |                            |                   |         |               | 40                               |
| Jelvehzadeh, F, et al., 2022 <sup>94</sup> | Iran    | breast      | 48 (100)                       | 24 (100)                              | 24 (100)                         | n/a                                   | 8 sessions for 8 weeks, each session lasts for 120 min                                                                      | HcP                     | FF                         | G                 | QoL     | MQOL          | 8                                |
|                                            |         |             |                                |                                       |                                  |                                       |                                                                                                                             |                         |                            |                   |         |               | 12                               |
| Qiu, H, et al., 2018 <sup>95</sup>         | China   | breast      | 294 (100)                      | 98 (100)                              | 196 (100)                        | cognitive behavioral therapy          | nine sessions for 12 weeks                                                                                                  | Psy                     | FF                         | I                 | QoL     | FACT-B        | 4                                |
|                                            |         |             |                                |                                       |                                  |                                       |                                                                                                                             |                         |                            |                   |         |               | 12                               |
|                                            |         |             |                                |                                       |                                  |                                       |                                                                                                                             |                         |                            |                   |         |               | 24                               |
|                                            |         |             |                                |                                       |                                  | self-care management                  |                                                                                                                             |                         |                            |                   |         |               | 4                                |
|                                            |         |             |                                |                                       |                                  |                                       |                                                                                                                             |                         |                            |                   |         |               | 12                               |
|                                            |         |             |                                |                                       |                                  |                                       |                                                                                                                             |                         |                            |                   |         |               | 24                               |
| Girgis, A, et al., 2009 <sup>96</sup>      | Wales   | mixed       | 356 (n/a)                      | n/a                                   | n/a                              | supportive care interventions         | baseline and at 3 and 6 months                                                                                              | HcP                     | M (FF, O)                  | I                 | QoL     | EORTC QLQ-C30 | 12                               |
|                                            |         |             |                                |                                       |                                  | general oncologist/practitioner model |                                                                                                                             |                         | M (FF, O)                  |                   |         |               | 24                               |

| Author                                           | Country | Cancer type | Sample size (female% of total) | Sample size (female% of intervention) | Sample size (female% of control) | Intervention name                                                            | Intervention's duration                                                                                                                                                                                                                                                                           | Intervention's provider | Intervention's environment | Intervention type | Outcome | Questionnaire  | Time of the measurement in weeks |
|--------------------------------------------------|---------|-------------|--------------------------------|---------------------------------------|----------------------------------|------------------------------------------------------------------------------|---------------------------------------------------------------------------------------------------------------------------------------------------------------------------------------------------------------------------------------------------------------------------------------------------|-------------------------|----------------------------|-------------------|---------|----------------|----------------------------------|
|                                                  |         |             |                                |                                       |                                  | supportive care interventions<br>telephone caseworker                        |                                                                                                                                                                                                                                                                                                   |                         | T                          |                   |         |                | 12                               |
|                                                  |         |             |                                |                                       |                                  |                                                                              |                                                                                                                                                                                                                                                                                                   |                         | T                          |                   |         |                | 24                               |
| <b>Guan, S, et al., 2019<sup>97</sup></b>        | China   | mixed       | 100 (100)                      | 50 (100)                              | 50 (100)                         | psychological intervention                                                   | 5-year prognostic follow-up were recorded.                                                                                                                                                                                                                                                        | HcP                     | FF                         | I                 | QoL     | EORTC-QLQ-C30  | 8                                |
| <b>Guo, Z, et al., 2013<sup>98</sup></b>         | China   | mixed       | 178 (58)                       | 89 (58)                               | 89 (58)                          | psychoeducation, cognitive-behavioral therapy, supportive-expressive therapy | two 60-min face to face interviews each week                                                                                                                                                                                                                                                      | HcP                     | FF                         | G                 | QoL     | EORTC QLQ-C30  | 2                                |
|                                                  |         |             |                                |                                       |                                  |                                                                              |                                                                                                                                                                                                                                                                                                   |                         |                            |                   | S       | n/a            | n/a                              |
| <b>Heiney, SP, et al., 2003<sup>99</sup></b>     | USA     | breast      | 66 (100)                       | 33 (100)                              | 33 (100)                         | n/a                                                                          | 6 weekly sessions that were 90 minutes long, conference phone call                                                                                                                                                                                                                                | Psy                     | T                          | G                 | QoL     | EORTC QLQ-BR23 | 6                                |
|                                                  |         |             |                                |                                       |                                  |                                                                              |                                                                                                                                                                                                                                                                                                   |                         |                            |                   |         |                | 16                               |
| <b>Henderson, VP, et al., 2013<sup>100</sup></b> | USA     | breast      | 111 (100)                      | 53 (100)                              | 58 (100)                         | mindfulness based stress reduction (MBSR)                                    | (1) an introductory meeting for one group; (2) 8 weekly 2.5- to 3.5-hour sessions in Gs of 25 to 30 women, with an additional 7.5-hour intensive retreat session given in the sixth week; and (3) 3 additional 2-hour sessions at monthly intervals following completion of the MBSR intervention | HcP                     | FF                         | G                 | QoL     | FACT-B         | 16                               |

| Author                                     | Country | Cancer type | Sample size (female% of total) | Sample size (female% of intervention) | Sample size (female% of control) | Intervention name                         | Intervention's duration                                                                                                                                                                                                                                                                                                                                                                                            | Intervention's provider | Intervention's environment | Intervention type | Outcome | Questionnaire                                          | Time of the measurement in weeks |
|--------------------------------------------|---------|-------------|--------------------------------|---------------------------------------|----------------------------------|-------------------------------------------|--------------------------------------------------------------------------------------------------------------------------------------------------------------------------------------------------------------------------------------------------------------------------------------------------------------------------------------------------------------------------------------------------------------------|-------------------------|----------------------------|-------------------|---------|--------------------------------------------------------|----------------------------------|
| Henderson, VP, et al., 2012 <sup>101</sup> | USA     | breast      | 111 (100)                      | 53 (100)                              | 58 (100)                         | Mindfulness based stress reduction (MBSR) | (1) an introductory meeting for an introductory meeting for one group;<br>(2) the 8-week standard MBSR intervention to a heterogeneous G of patients with a variety of medical/psychiatric disorders, seven weekly 2.5 to 3.5-hour sessions and one 7.5 hour intensive silent retreat session in the 6th week;<br>(3) three monthly 2-hour sessions for BRIDGES-only participants following completion of the MBSR | HcP                     | FF                         | G                 | QoL     | FACT-B                                                 | 16                               |
| Hoffman, CJ, et al., 2013 <sup>102</sup>   | UK      | breast      | 229 (100)                      | n/a (100)                             | n/a (100)                        | mindfulness-based stress reduction        | 9 weekly, 2 hours , except the 1st and last classes were 2.25 hours, plus one 6-hour day of mindfulness in week 6. Home practice was delivered by four 45-minute compact discs of formal mindfulness practices and a manual. Participants were asked to practice for 40 to 45 minutes for 6 or 7 d/wk                                                                                                              | HcP                     | M (FF, SH)                 | M (G, SH)         | QoL     | FACT-B<br>FACT PWB<br>FACT SWB<br>FACT EWB<br>FACT FWB | 8; 12                            |

| Author                                    | Country     | Cancer type | Sample size (female% of total) | Sample size (female% of intervention) | Sample size (female% of control) | Intervention name                                                         | Intervention's duration                                                                                                        | Intervention's provider | Intervention's environment | Intervention type | Outcome | Questionnaire                 | Time of the measurement in weeks |
|-------------------------------------------|-------------|-------------|--------------------------------|---------------------------------------|----------------------------------|---------------------------------------------------------------------------|--------------------------------------------------------------------------------------------------------------------------------|-------------------------|----------------------------|-------------------|---------|-------------------------------|----------------------------------|
| Johansson, B, et al., 2008 <sup>103</sup> | Sweden      | mixed       | 481 (58)                       | n/a (n/a)                             | n/a (n/a)                        | individual support                                                        | The median number of contacts was 3 (minimum–maximum: 1–24).                                                                   | Psy                     | M (FF, T)                  | I                 | QoL     | EORTC QLQ C-30                | 12                               |
|                                           |             |             |                                |                                       |                                  |                                                                           |                                                                                                                                |                         |                            |                   |         |                               | 24                               |
|                                           |             |             |                                |                                       |                                  |                                                                           |                                                                                                                                |                         |                            |                   |         |                               | 48                               |
|                                           |             |             |                                |                                       |                                  |                                                                           |                                                                                                                                |                         |                            |                   |         |                               | 96                               |
| Kim, YH, et al., 2017 <sup>104</sup>      | South Korea | breast      | 60 (100)                       | 30 (100)                              | 30 (100)                         | psychological intervention                                                | 6 weeks, as patients visited the clinic every 3 weeks for their chemotherapy, all the data were collected during these visits. | N                       | M (FF, T)                  | I                 | QoL     | EORTC QLQ C-30                | 6                                |
|                                           |             |             |                                |                                       |                                  |                                                                           |                                                                                                                                |                         |                            |                   |         |                               | 9                                |
| Klafke, N, et al., 2019 <sup>105</sup>    | Germany     | breast      | 231 (100)                      | 112 (100)                             | 113 (100)                        | supportive care intervention using complementary and integrative medicine | weekly, maximum time of the intervention was set to 24 weeks                                                                   | N                       | FF                         | I                 | QoL     | EORTC-QLQ-C30                 | 12                               |
|                                           |             |             |                                |                                       |                                  |                                                                           |                                                                                                                                |                         |                            |                   |         |                               | 24                               |
|                                           |             |             |                                |                                       |                                  |                                                                           |                                                                                                                                |                         |                            |                   |         |                               | 48                               |
| Rahmani, S, et al. 2015 <sup>106</sup>    | Iran        | breast      | 24 (100)                       | 12 (100)                              | 12 (100)                         | mindfulness based stress reduction                                        | once a week in a 2-hour session for 8 weeks                                                                                    | Psy                     | FF                         | G                 | QoL     | EORTC QLQ-C30, EORTC QLQ-BR23 | 8                                |
|                                           |             |             |                                |                                       |                                  |                                                                           |                                                                                                                                |                         |                            |                   |         |                               | 16                               |
| Reich, RR, et al. 2016 <sup>107</sup>     | USA         | breast      | 322 (100)                      | 167 (100)                             | 155 (100)                        | mindfulness based stress reduction                                        | six-week, two-hour per week                                                                                                    | Psy                     | FF                         | G                 | QoL     | SF-36                         | 6                                |
|                                           |             |             |                                |                                       |                                  |                                                                           |                                                                                                                                |                         |                            |                   |         |                               | 12                               |
| Savard, J, et al., 2006 <sup>108</sup>    | Canada      | breast      | 37 (100)                       | 21 (100)                              | 16 (100)                         | cognitive therapy                                                         | weekly sessions of 60 to 90 min for 8 weeks plus 3 booster sessions every 3 weeks                                              | Psy                     | FF                         | I                 | QoL     | QLQ-C30                       | 8                                |

| Author                                       | Country     | Cancer type | Sample size (female% of total) | Sample size (female% of intervention) | Sample size (female% of control) | Intervention name                      | Intervention's duration                                                                                                | Intervention's provider | Intervention's environment | Intervention type | Outcome | Questionnaire | Time of the measurement in weeks |
|----------------------------------------------|-------------|-------------|--------------------------------|---------------------------------------|----------------------------------|----------------------------------------|------------------------------------------------------------------------------------------------------------------------|-------------------------|----------------------------|-------------------|---------|---------------|----------------------------------|
| Schellekens, MPJ, et al. 2016 <sup>109</sup> | Canada      | breast      | 139 (100)                      | 69 (100)                              | 70 (100)                         | mindfulness-based cancer recovery      | 8 weekly group sessions of 90 min each plus a 6-h silent retreat between weeks 6 and 7 for a total of 18 contact hours | HcP                     | FF                         | G                 | QoL     | FACT-B        | 8                                |
| van den Berg, SW, et al. 2015 <sup>110</sup> | Netherlands | breast      | 150 (100)                      | 70 (100)                              | 80 (100)                         | cognitive behavioral therapy           | sixteen fully automated weekly modules (16 weeks)                                                                      | SH                      | SH                         | SH                | QoL     | EORTC QLQ-C30 | 4                                |
| Wang, TJ, et al., 2023 <sup>111</sup>        | Taiwan      | colorectal  | 142 (41)                       | 70 (33)                               | 72 (49)                          | self-management support program        | two personal skills training sessions, and 12 follow-up telephone calls                                                | SH                      | M (FF, T)                  | SH                | QoL     | FACT-G        | 8                                |
|                                              |             |             |                                |                                       |                                  |                                        |                                                                                                                        |                         |                            |                   |         |               | 16                               |
|                                              |             |             |                                |                                       |                                  |                                        |                                                                                                                        |                         |                            |                   |         |               | 24                               |
| Xia, S, et al., 2023 <sup>112</sup>          | Ireland     | colorectal  | 160 (n/a)                      | 80 (41)                               | 80 (34)                          | cognitive behavioral stress management | 10 times, weekly 120 minutes                                                                                           | HcP                     | FF                         | G                 | QoL     | EORTC QLQ-C30 | 4                                |
|                                              |             |             |                                |                                       |                                  |                                        |                                                                                                                        |                         |                            |                   |         |               | 12                               |
|                                              |             |             |                                |                                       |                                  |                                        |                                                                                                                        |                         |                            |                   |         |               | 24                               |
| Peng, L, et al., 2022 <sup>113</sup>         | China       | breast      | 57 (100)                       | 28 (100)                              | 29 (100)                         | mindfulness-based stress reduction     | 6 week, weekly 1,5 h plus daily 30 mins                                                                                | Psy                     | FF                         | G                 | QoL     | EORTC QLQ-C30 | 0,1                              |
|                                              |             |             |                                |                                       |                                  |                                        |                                                                                                                        |                         |                            |                   |         |               | 4                                |
| Kissane, DW, et al., 2023 <sup>114</sup>     | Australia   | mixed       | 107 (n/a)                      | 55 (73)                               | 52 (79)                          | meaning and purpose therapy            | six 60 mins session every two weeks                                                                                    | HcP                     | FF                         | I                 | QoL     | MQOL-revised  | 12                               |
|                                              |             |             |                                |                                       |                                  |                                        |                                                                                                                        |                         |                            |                   |         |               | 24                               |

| Author                                     | Country     | Cancer type | Sample size (female% of total) | Sample size (female% of intervention) | Sample size (female% of control) | Intervention name                                                      | Intervention's duration                                             | Intervention's provider | Intervention's environment | Intervention type | Outcome  | Questionnaire   | Time of the measurement in weeks |
|--------------------------------------------|-------------|-------------|--------------------------------|---------------------------------------|----------------------------------|------------------------------------------------------------------------|---------------------------------------------------------------------|-------------------------|----------------------------|-------------------|----------|-----------------|----------------------------------|
| Zaman, ACGNM, et al., 2021 <sup>115</sup>  | Netherlands | mixed       | 88 (na)                        | 42 (36)                               | 46 (33)                          | tailored work-related intervention                                     | 3 times 30 minutes in the beginning, then at 6 month and at 9 month | HcP                     | M (FF, T)                  | I                 | QoL      | SF-12           | 12                               |
| Kim, SH, et al., 2021 <sup>116</sup>       | South Korea | breast      | 94 (100)                       | 47 (100)                              | 47 (100)                         | partnership-based, needs tailored self-management support intervention | 10 session, 15-20 minutes over 7 weeks                              | N                       | T                          | I                 | QoL      | SF-36           | 8                                |
| McCusker, J, et al., 2021 <sup>117</sup>   | Canada      | mixed       | 145 (n/a)                      | 121 (75)                              | 124 (82)                         | Can Direct-depression self-care intervention                           | 15 calls for 15 mins                                                | HcP                     | T                          | I                 | QoL      | SF-12           | 12                               |
|                                            |             |             |                                |                                       |                                  |                                                                        |                                                                     |                         |                            |                   |          |                 | 24                               |
| Lee, JT, et al., 2022 <sup>118</sup>       | Taiwan      | mixed       | 60 (100)                       | 30 (100)                              | 30 (100)                         | mindfulness-based stress management                                    | 12 week, 2 hours weekly                                             | Psy                     | FF                         | G                 | QoL      | FACT-G          | 12                               |
|                                            |             |             |                                |                                       |                                  |                                                                        |                                                                     |                         |                            |                   |          |                 | 24                               |
| Lu, Z, et al., 2021 <sup>119</sup>         | China       | mixed       | 326 (n/a)                      | 214 (30)                              | 114 (32)                         | early supportive care intervention                                     | n/a                                                                 | Psy                     | FF                         | I                 | QoL      | EORTC QLQ-C30   | 9                                |
|                                            |             |             |                                |                                       |                                  |                                                                        |                                                                     |                         |                            |                   | survival | n/a             | n/a                              |
| Kirkegaard, AM, et al. 2023 <sup>120</sup> | Denmark     | breast      | 198 (100)                      | 96 (100)                              | 102 (100)                        | cognitive existential therapy                                          | 2 times 6 hours session, plus eight session 2,5 hours each          | Psy                     | FF                         | G                 | survival | n/a             | n/a                              |
| Cengiz, HO, et al., 2023 <sup>121</sup>    | Turkey      | breast      | 65 (100)                       | 32 (100)                              | 33 (100)                         | mindfulness-based therapy                                              | 8 weeks, weekly, 45-60 mins sessions                                | HcP                     | O                          | G                 | QoL      | FACT-G, FACT-Sp | 8                                |



| Author                                            | Country | Cancer type | Sample size (female% of total) | Sample size (female% of intervention) | Sample size (female% of control) | Intervention name                                                                                  | Intervention's duration                                                                                                         | Intervention's provider | Intervention's environment | Intervention type | Outcome | Questionnaire                 | Time of the measurement in weeks |
|---------------------------------------------------|---------|-------------|--------------------------------|---------------------------------------|----------------------------------|----------------------------------------------------------------------------------------------------|---------------------------------------------------------------------------------------------------------------------------------|-------------------------|----------------------------|-------------------|---------|-------------------------------|----------------------------------|
| Seliniotaki, T, et al., 2021 <sup>122</sup>       | Greece  | breast      | 53 (100)                       | 27 (100)                              | 26 (100)                         | stress management program                                                                          | 8 session weekly, 45 minutes each                                                                                               | Psy                     | FF                         | I                 | QoL     | EORTC QLQ-C30                 | 8                                |
| <b>Articles included in the systematic review</b> |         |             |                                |                                       |                                  |                                                                                                    |                                                                                                                                 |                         |                            |                   |         |                               |                                  |
| Anderson, K. et al, 2006 <sup>123</sup>           | USA     | mixed       | 57 (79)                        | 44 (n/a)                              | 13 (n/a)                         | n/a                                                                                                | practice at least 5 times a week (for each of 2 weeks) for approximately 20 minutes per session.                                | SH                      | SH                         | SH                | QoL     | FACT-G                        | 2,5                              |
|                                                   |         |             |                                |                                       |                                  |                                                                                                    |                                                                                                                                 |                         |                            |                   |         |                               | 8,5                              |
| Björneklett, HG, et al., 2012 <sup>124</sup>      | Sweden  | breast      | 383 (100)                      | n/a (100)                             | n/a (100)                        | psychosocial support intervention                                                                  | 4 months after the end of adjuvant treatment and ran for 7 days, followed by a 4-day follow-up 2 months after the initial visit | HcP                     | FF                         | G                 | QoL     | EORTC QLQ-C30, EORTC QLQ-BR23 | 8                                |
|                                                   |         |             |                                |                                       |                                  |                                                                                                    |                                                                                                                                 |                         |                            |                   |         |                               | 24                               |
|                                                   |         |             |                                |                                       |                                  |                                                                                                    |                                                                                                                                 |                         |                            |                   |         |                               | 48                               |
| Børøsd, E. et al. 2020 <sup>125</sup>             | Norway  | mixed       | 172 (82)                       | n/a (n/a)                             | n/a (n/a)                        | n/a                                                                                                | 10 modules on the app, practice content for at least 30 minutes per day                                                         | SH                      | SH                         | SH                | QoL     | HRQoL (RAND-36)               | 12                               |
| Carbajal-López, E. B. et al. 2020 <sup>126</sup>  | Mexico  | stomach     | 27 (59)                        | 13 (n/a)                              | 14 (n/a)                         | internet-delivered cognitive behavioral stress management intervention and psychoeducation program | once a week for two hours                                                                                                       | HcP                     | O                          | I                 | QoL     | EORTC QLQ-30                  | 5                                |
|                                                   |         |             |                                |                                       |                                  |                                                                                                    |                                                                                                                                 |                         |                            |                   |         |                               | 13                               |

| Author                                 | Country | Cancer type    | Sample size (female% of total) | Sample size (female% of intervention) | Sample size (female% of control) | Intervention name                                                  | Intervention's duration                                                                                                 | Intervention's provider | Intervention's environment | Intervention type | Outcome | Questionnaire                 | Time of the measurement in weeks |
|----------------------------------------|---------|----------------|--------------------------------|---------------------------------------|----------------------------------|--------------------------------------------------------------------|-------------------------------------------------------------------------------------------------------------------------|-------------------------|----------------------------|-------------------|---------|-------------------------------|----------------------------------|
| Rahmani, S, et al. 2014 <sup>127</sup> | Iran    | breast         | 36 (100)                       | n/a (100)                             | n/a (100)                        | mindfulness based stress reduction                                 | once a week in a 2-hour session for 8 weeks                                                                             | Psy                     | FF                         | G                 | QoL     | EORTC QLQ-C30, EORTC QLQ-BR23 | 8                                |
|                                        |         |                |                                |                                       |                                  | metacognition therapy                                              |                                                                                                                         |                         |                            |                   |         |                               | 16                               |
|                                        |         |                |                                |                                       |                                  |                                                                    |                                                                                                                         |                         |                            |                   |         |                               | 8                                |
|                                        |         |                |                                |                                       |                                  |                                                                    |                                                                                                                         |                         |                            |                   |         |                               | 16                               |
| Carlson, L. et al. 2013 <sup>128</sup> | Canada  | breast         | 165 (100)                      | 111 (100)                             | 54 (100)                         | mindfulness-based cancer recovery                                  | 8 weekly group sessions of 90 minutes each plus a 6-hour workshop between weeks 6 and 7 for a total of 18 contact hours | HcP                     | FF                         | G                 | QoL     | FACT-B                        | 8                                |
|                                        |         |                |                                |                                       |                                  | supportive-expressive therapy                                      | 12 weekly sessions of 90 minutes each                                                                                   | Psy                     |                            |                   |         |                               |                                  |
| Ell, K, et al., 2008 <sup>129</sup>    | USA     | mixed          | 472 (100)                      | 242 (100)                             | 230 (100)                        | Alleviating Depression Among Patients With Cancer psychotherapy    | weekly sessions ranging from 6 to 12 weeks                                                                              | HcP                     | T                          | I                 | QOL     | FACT-G                        | 48                               |
| Lapid, MI, et al., 2007 <sup>130</sup> | USA     | geriatric      | 33 (100)                       | 17 (100)                              | 16 (100)                         | psychosocial intervention                                          | in 4 weeks: 8 times 90 minutes session                                                                                  | Psy                     | FF                         | G                 | QoL     | LAPAQ                         | 4                                |
|                                        |         |                |                                |                                       |                                  |                                                                    |                                                                                                                         |                         |                            |                   |         |                               | 8                                |
|                                        |         |                |                                |                                       |                                  |                                                                    |                                                                                                                         |                         |                            |                   |         |                               | 27                               |
| Lu, J, et al., 2017 <sup>131</sup>     | China   | nasopharyngeal | 106 (n/a)                      | 53 (n/a)                              | 53 (n/a)                         | health education and behavior therapy and psychological counseling | n/a                                                                                                                     | N                       | FF                         | I                 | QoL     | EORTC QLQ-C30                 | n/a                              |
|                                        |         |                |                                |                                       |                                  |                                                                    |                                                                                                                         |                         |                            |                   |         |                               | 24                               |
|                                        |         |                |                                |                                       |                                  |                                                                    |                                                                                                                         |                         |                            |                   |         |                               | 48                               |
|                                        |         |                |                                |                                       |                                  |                                                                    |                                                                                                                         |                         |                            |                   |         |                               | 96                               |

| Author                                    | Country     | Cancer type | Sample size (female% of total) | Sample size (female% of intervention) | Sample size (female% of control) | Intervention name                                | Intervention's duration                    | Intervention's provider | Intervention's environment | Intervention type | Outcome | Questionnaire | Time of the measurement in weeks |
|-------------------------------------------|-------------|-------------|--------------------------------|---------------------------------------|----------------------------------|--------------------------------------------------|--------------------------------------------|-------------------------|----------------------------|-------------------|---------|---------------|----------------------------------|
| Murphy, MJ, et al., 2019 <sup>132</sup>   | Australia   | mixed       | 114 (89)                       | 53 (87)                               | 61 (90)                          | cognitive behavioral therapy                     | 8 lessons over 16 weeks                    | HcP                     | O                          | I                 | QoL     | FACT-G        | 16                               |
| Pettiford, J, et al., 2017 <sup>133</sup> | USA         | breast      | 103 (100)                      | 47 (100)                              | 56 (100)                         | bio-psychosocial intervention program            | two occasion 4 hour class                  | HcP                     | FF                         | G                 | QoL     | FACT-B        | 24                               |
|                                           |             |             |                                |                                       |                                  |                                                  |                                            |                         |                            |                   |         |               | 48                               |
|                                           |             |             |                                |                                       |                                  |                                                  |                                            |                         |                            |                   |         |               | 72                               |
|                                           |             |             |                                |                                       |                                  |                                                  |                                            |                         |                            |                   |         |               | 96                               |
| Poort, H, et al., 2020 <sup>134</sup>     | Netherlands | mixed       | 134 (57)                       | n/a (n/a)                             | n/a (n/a)                        | cognitive behavioral therapy for fatigue         | 10 sessions, 1 hour each, over 12 weeks    | Psy                     | FF                         | I                 | QoL     | EORTC QLQ-C30 | 14                               |
| Ramirez, AG, et al., 2019 <sup>135</sup>  | USA         | mixed       | 288 (54)                       | n/a (53)                              | n/a (55)                         | community delivered intervention                 | 3 months, sessions not specified           | HcP                     | M (T, O)                   | I                 | QoL     | FACT-G        | 12                               |
|                                           |             |             |                                |                                       |                                  |                                                  |                                            |                         |                            |                   |         |               | 36                               |
|                                           |             |             |                                |                                       |                                  |                                                  |                                            |                         |                            |                   |         |               | 60                               |
| Rottmann, N, et al., 2012 <sup>136</sup>  | n/a         | mixed       | 452 (n/a)                      | 208 (70)                              | 244 (59)                         | psychosocial rehabilitation course               | 6 day, weekly plus weekly 20 mins sessions | HcP                     | FF                         | G                 | QoL     | EORTC QLQ-C30 | 4,24                             |
| Sharpe, M, et al., 2014 <sup>137</sup>    | UK          | n/a         | 500 (n/a)                      | 253 (90)                              | 247 (90)                         | depression care for people with cancer programme | max 10 session over 4 months               | N                       | FF or T                    | I                 | QoL     | EORTC-QLQ-C30 | 12                               |
|                                           |             |             |                                |                                       |                                  |                                                  |                                            |                         |                            |                   |         |               | 36                               |
|                                           |             |             |                                |                                       |                                  |                                                  |                                            |                         |                            |                   |         |               | 48                               |

| Author                                 | Country     | Cancer type | Sample size (female% of total) | Sample size (female% of intervention) | Sample size (female% of control) | Intervention name                                                                            | Intervention's duration                                                                                             | Intervention's provider | Intervention's environment | Intervention type | Outcome | Questionnaire                                       | Time of the measurement in weeks |
|----------------------------------------|-------------|-------------|--------------------------------|---------------------------------------|----------------------------------|----------------------------------------------------------------------------------------------|---------------------------------------------------------------------------------------------------------------------|-------------------------|----------------------------|-------------------|---------|-----------------------------------------------------|----------------------------------|
| Sohl, SJ, et al., 2017 <sup>138</sup>  | USA         | breast      | 139 (100)                      | 69 (100)                              | 70 (100)                         | expressive writing                                                                           | four, 20-min session, two sessions per week spaced 48 h apart                                                       | SH                      | SH                         | SH                | QoL     | FACT-B                                              | 4                                |
| Van Amstel et al., 2019 <sup>139</sup> | Netherlands | breast      | 194 (100)                      | 96 (100)                              | 98 (100)                         | emotional support, education about cancer                                                    | every 3 months during the follow-up visits in the first year and every 6 months during the second year of follow-up | N                       | FF                         | M (I, T)          | QoL     | EORTC QLQ C-30                                      | 12                               |
|                                        |             |             |                                |                                       |                                  |                                                                                              |                                                                                                                     |                         |                            |                   |         |                                                     | 24                               |
|                                        |             |             |                                |                                       |                                  |                                                                                              |                                                                                                                     |                         |                            |                   |         |                                                     | 36                               |
|                                        |             |             |                                |                                       |                                  |                                                                                              |                                                                                                                     |                         |                            |                   |         |                                                     | 48                               |
|                                        |             |             |                                |                                       |                                  |                                                                                              |                                                                                                                     |                         |                            |                   |         |                                                     | 72                               |
| 96                                     |             |             |                                |                                       |                                  |                                                                                              |                                                                                                                     |                         |                            |                   |         |                                                     |                                  |
| Yanez, B, et al., 2015 <sup>140</sup>  | USA         | prostate    | 74 (0)                         | 37 (0)                                | 37 (0)                           | manualized cognitive behavioral stress management, relaxation + stress management techniques | 10 weeks , 90 min/sessions                                                                                          | HcP                     | O                          | G                 | QoL     | FACT-G                                              | 24                               |
| Wenzel, L, et al., 2015 <sup>141</sup> | USA         | cervical    | 203 (100)                      | 115 (100)                             | 88 (100)                         | psychosocial counseling                                                                      | included five weekly sessions and a 1-month booster.                                                                | HcP                     | T                          | I                 | QoL     | FACT-Cx, FACT-TOI, FACT Additional Concerns, FACT-G | 36                               |
|                                        |             |             |                                |                                       |                                  |                                                                                              |                                                                                                                     |                         |                            |                   |         |                                                     | 16                               |
| Urech, C, et al., 2018 <sup>142</sup>  | Switzerland | mixed       | 129 (85)                       | 65 (82)                               | 64 (88)                          | stress management                                                                            | 8 weeks                                                                                                             | SH                      | SH                         | SH                | QoL     | FACT-G                                              | 8                                |

| Author                                 | Country | Cancer type | Sample size (female% of total) | Sample size (female% of intervention) | Sample size (female% of control) | Intervention name                        | Intervention's duration                                                       | Intervention's provider | Intervention's environment | Intervention type | Outcome | Questionnaire | Time of the measurement in weeks |
|----------------------------------------|---------|-------------|--------------------------------|---------------------------------------|----------------------------------|------------------------------------------|-------------------------------------------------------------------------------|-------------------------|----------------------------|-------------------|---------|---------------|----------------------------------|
| Burns DS, et al., 2001 <sup>44</sup>   | USA     | mixed       | 80 (100)                       | 40 (100)                              | 40 (100)                         | bonny method of guided imagery and music | once a week for ten weeks, for one to two hours                               | Psy                     | FF                         | I                 | QoL     | QoL-CA        | 10                               |
|                                        |         |             |                                |                                       |                                  |                                          |                                                                               |                         |                            |                   |         |               | 16                               |
| Lerman, R, et al., 2012 <sup>143</sup> | UK      | mixed       | 68 (100)                       | 48 (100)                              | 20 (100)                         | mindfulness-based stress reduction       | once a week for 2 hours class and a single 4 hours weekend retreat held twice | Psy                     | FF                         | G                 | QoL     | EORTC QLQ-C30 | 8                                |

**Table 1. Main characteristics of the included studies:** Abbreviations: AQoL-8D, Assessment of Quality of Life; BSI-GSI, Brief Symptom Inventory-Global Severity Index; CBT, Cognitive Behavior Therapy CCV, Cuestionario de Calidad de Vida; EORTC QLQ-BR23, European Organization for Research and Treatment of Cancer Quality of Life Questionnaire-Breast Cancer; EORTC-QLQ-C30, European Organization for Research and Treatment of Cancer Quality of Life Questionnaire C-30; EORTC-QLQ-PR25, European Organization for Research and Treatment of Cancer Quality of Life Questionnaire-Prostate Cancer; EORTC QLQ-STO22, European Organization for Research and Treatment of Cancer Quality of Life Questionnaire-Gastric Cancer; EPIC-26, Expanded Prostate Cancer Index Composite Short-Form; EQ-5D-VA, EuroQol-5D visual analogue scale; EuroQol 5D-5L, EuroQol-5D-5 level; FACIT-Sp, Functional Assessment of Chronic Illness Therapy-Spiritual Well-Being Scale; FACIT, Functional Assessment of Cancer Therapy; FACT-B (Functional Assessment of Cancer Therapy-Breast; FACT-C; Functional Assessment of Cancer Therapy-Colorectal; FACT-Cx, Functional Assessment of Cancer Therapy-Cervix; FACT EWB, Functional Assessment of Cancer Therapy-Emotional Well-being; FACT-F (Functional Assessment of Cancer Therapy-Fatigue; FACT FWB (Functional Assessment of Cancer Therapy-Functional Well-being; FACT-G, Functional Assessment of Cancer Therapy-General; FACT PWB, Functional Assessment of Cancer Therapy-Physical Well-Being; FACT SWB, Functional Assessment of Cancer Therapy- Social Well-Being; FF, Face-to-face; FLIC; Functional Living Index Cancer; G, Group; GHQ-28, General Health Questionnaire; GQOL, Global Quality of Life Scale; HcP(Healthcare Professional; IIEF, International Index of Erectile Function; IPSS, International Prostate Symptom Score; I, Individual; LASA, Spitzer Uniscale and Linear Analogue Self-assessment; MBCT, Mindfulness Based Cognitive Therap; MBSR, Mindfulness Based Stress Reduction; M, Mixed; MQOL, McGill Quality of Life Questionnaire; N, Nurse; O, Online; PCI, Prostate Cancer Index; PCQoL, Prostate Cancer Quality of Life Instrument; POSM, Positive States of Mind; PSQI, Pittsburgh Sleep Quality Index; Psy, Psychologist; QoL-CA, Quality of life Cancer Scale; QOLI-CV, Quality of Life Cancer Version; RAND-36-HRQoL, RAND 36-Item Health Survey- Health-Related Quality of Life; SCNS-S34, Supportive Care Needs Survey; SF-36, Short Form Health Survey; SF-36 MCS, Short Form Health Survey Mental Component Summary; SH, Self-help; T, Telephone; WHO-QOL-BREF, The World Health Organization Quality of Life brief version

## Section S2. Statistical Analysis

### SURVIVAL

We used hazard rate (HR) with 95% confidence interval (CI) for the effect size measure of survival. The hazard ratios with its CI were extracted from each study directly from the written text or using the published survival functions (Kaplan-Meier plots). *Additional data collection was performed, with the GetData Graph digitizer version 2.26.0.20.*

As we anticipated considerable between-study heterogeneity, a random-effects model was used to pool effect sizes.

Inverse variance weighting method was used to calculate the pooled HR using the point estimates for HR and the standard error calculated from the confidence interval (using standard normal approximation on logarithmic scale).

For the outcomes where the study number was at least 5, a Hartung-Knapp adjustment (Knapp and Hartung 2003; IntHout, Ioannidis, and Borm 2014) was used. Below 5 studies, we do not apply the adjustment.

To estimate the heterogeneity variance measure  $\tau^2$  the restricted maximum-likelihood estimator was applied with the Q profile method for confidence interval Veroniki et al. (2016). Additionally, between-study heterogeneity was described by the Higgins&Thompson's  $I^2$  statistics (Higgins and Thompson 2002).

Forest plots were used to graphically summarize the results.

Where applicable we reported the prediction intervals (i.e. the expected range of effects of future studies) of results following the recommendations of IntHout et al. (2016).

Outlier and influence analyses were carried out following the recommendations of Harrer et al. (2021) and Viechtbauer and Cheung (2010). Publication bias was assessed with Egger's test (at significance level 10% as small study number) using the classical Egger's method to calculate the test statistic Sterne et al. (2011). Based on the Cochrane Handbook the following cut-off points are given:

“Thresholds for the interpretation of  $I^2$  can be misleading, since the importance of inconsistency depends on several factors. A rough guide to interpretation is as follows:

0% to 40%: might not be important; 30% to 60%: may represent moderate heterogeneity; 50% to 90%: may represent substantial heterogeneity; 75% to 100%: considerable heterogeneity.”

All statistical analyses were made with R (R Core Team 2021, v4.1.2) using the *meta* (Schwarzer 2022, v5.2.0) and *dmetar* (Cuijpers, Furukawa, and Ebert 2022, v0.0.9000) packages.

### QUALITY OF LIFE:

Due to the differences in the questionnaires, a standardized mean difference (SMD) with 95% confidence interval was used for the effect size measure between intervention and control group. We used Hedges'  $g$  as SMD (Hedges 1981).

To calculate SMD we made the following steps:

I. At first we extracted the mean.

II. Then, we extracted or estimated the SD of change as written below:

1. If SD was given we extracted those values.
2. If the standard error (SE) is given, the SD was calculated by multiplying the SE by the square root of the sample size.
3. If the 95% confidence interval of mean was given, the SE was calculated using the

$$R_{\text{est}} = \frac{\{SD_{\text{baseline}}\}^2 + \{SD_{\text{followup}}\}^2 - \{SD_{\text{change}}\}^2}{2 * SD_{\text{baseline}} * SD_{\text{followup}}}$$

$2 * t_{n-1}$ , where  $Ul$  is the upper limit and  $Ll$  is the lower limit of the confidence interval and  $t$  is the t-value of a corresponding Student t-distribution with  $n-1$  degrees of freedom and 5% (2,5% symmetrical) p-value. Then the SD was calculated as written before.

As we anticipated considerable between-study heterogeneity, a random-effects model was used to pool effect sizes.

As several studies reported the observed values at different times, we added an additional random-effect based on each study.

We used the following assumptions:

- A continuous-time autoregressive structure is assumed for time dependence. Baseline data also included in the T0 time point.

To estimate the correlation structure, we determined the correlation coefficient ( $R_{\text{change}}$ ) of baseline and follow up values based on the extracted or calculated SD of change if the SD for baseline and follow up results was also given, using the following formula:

$$R_{\text{est}} = \frac{SD_{\text{baseline}}^2 + SD_{\text{followup}}^2 - SD_{\text{change}}^2}{2 * SD_{\text{baseline}} * SD_{\text{followup}}}$$

-where  $SDs$  are the standard deviation of the corresponding situation (baseline, after follow up, change).

If there were at least 3 articles, then the mean of the calculated  $R$  values was used as a starting value for estimated correlation coefficient ( $R_{\text{est}}$ ) in the correlation structure. (Otherwise we used the value 0.65 as in the outcomes with calculated  $R$  based on more articles resulting in this value.) In any case we run the final model with different  $R$  values to see its effect. Additionally the final model results were modified with cluster-robust test and

confidence interval estimation adjustment using the club sandwich method with small-sample and Satterthwaite approximation.

- To handle the assumed nonlinearity change in time, the squared value of time is also included in the linear model additionally on time as predictor. (Based on descriptive plots and to keep the model simpler and not more overfitted, no higher order component was used.)
- We included the following pre-identified interested predictor variables: *follow-up time value versus baseline value* (as a categorical variable) and one of the following: *provider type, environment type, intervention type, cancer stage, duration*). We did models with each predictor separately as it is easier to interpret and summarize the data, although confounding effects may occur and additionally there was limited information on *cancer stage* and *duration*.
- Possible interaction with time of interested variables was also checked using the information criterion (as AIC and BIC values). Our preliminary plan was to include the interaction in the final model if the interaction creates a better model based on the AIC and BIC values (if both AIC and BIC decreased by 2) and the parameter(s) of interaction is significant at level 5%. Based on these criterias we found no evidence to keep interactions in the model.

We report the calculated estimates with 95% CI. For categorical predictor variables an anova (Wald type) result is also given. We made predictions based on the model and we summarized it on forest plots with subgroups for easier interpretations. In this plot SMDs are also shown for individual studies and the overall effect we used the predicted value from the model without the grouping variable.

Inverse variance weighting method was used to calculate the pooled SMD.

To estimate the heterogeneity variance measure  $\tau^2$ , restricted maximum-likelihood estimator was applied Veroniki et al. (2016).

Publication bias and small study effect was assessed using funnel plots.

All statistical analyses were made with R (R Core Team 2022, v4.2.1) using the following packages: *metafor* (Viechtbauer 2022, v3.4.0) for model calculations, publication bias and influential assessment, *meta* (Schwarzer 2022, v5.5.0) for forest plots, *ggplot2* (Wickham et al. 2022, v3.3.6) for prediction plots.



## S2.Overall plots

Figure.S2.1.T12

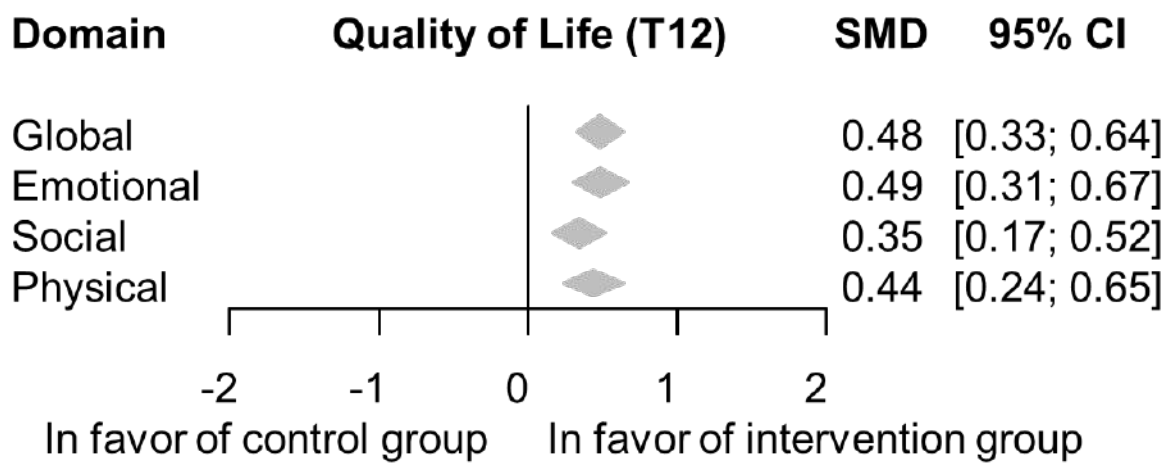

**Figure S.2.1. Psychological interventions improve Quality of Life (QoL).** Forest plot of pooled results representing that psychological interventions have a significant effect on improving global, emotional, social and physical quality of life compared to the control group estimated at 12 weeks (T12). SMD - Standardized mean difference, CI- confidence interval. Forest plots for individual study effects can be found in S4-S22.

Figure S2.2.T24

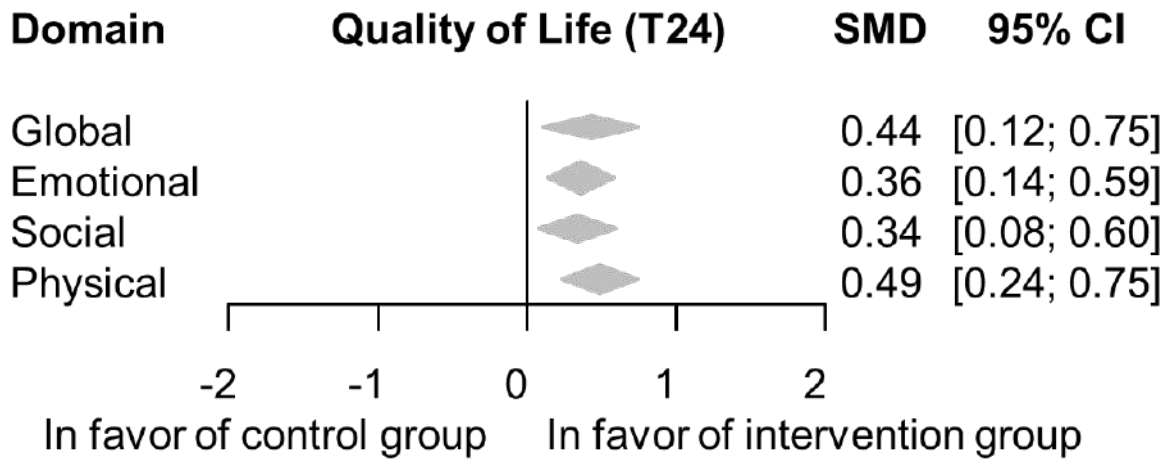

Figure S.2.2. **Psychological interventions improve Quality of Life (QoL)**. Forest plot of pooled results representing that psychological interventions have a significant effect on improving global, emotional, social and physical quality of life compared to the control group estimated at 24 weeks (T24). SMD - Standardized mean difference, CI- confidence interval. Forest plots for individual study effects can be found in S4-S22.

Figure S2.3.T48

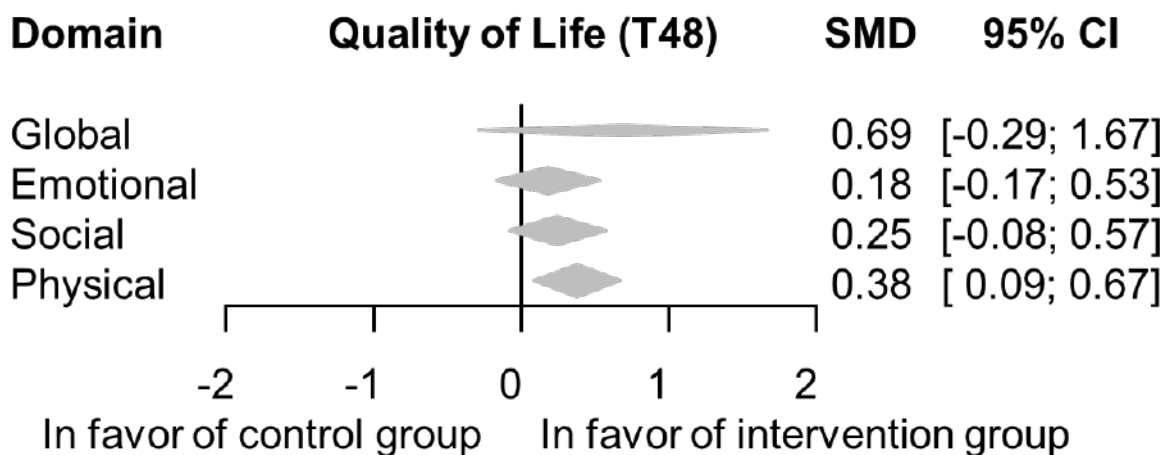

Figure S.2.3. **Psychological interventions improve Quality of Life (QoL)**. Forest plot of pooled results representing that psychological interventions have a significant effect on improving physical quality of life compared to the control group estimated at 48 weeks. SMD - Standardized mean difference, CI- confidence interval. Forest plots for individual study effects can be found in S4-S22

### S3. Subgroup analysis of Global QoL: Provider

Figure S3.1.T0

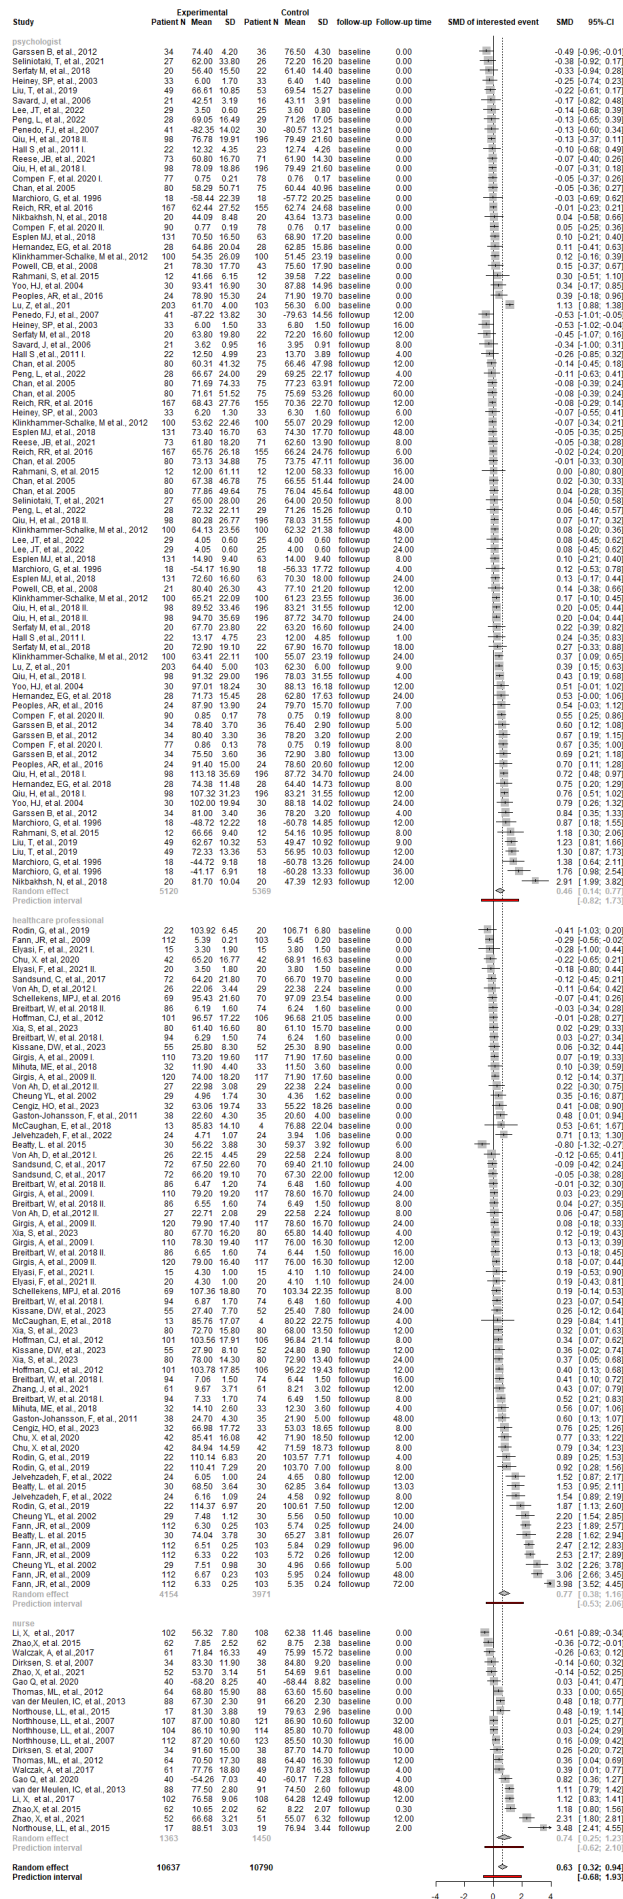

Figure S3.1. Subgroup analysis of the Global QoL. Forest plot represents the difference between the intervention vs. control group in the Global QoL domain with the provider subgroups as predicted at week 0 (post-intervention). SMD - Standardized mean difference, CI - confidence interval.





Figure S3.4.T48

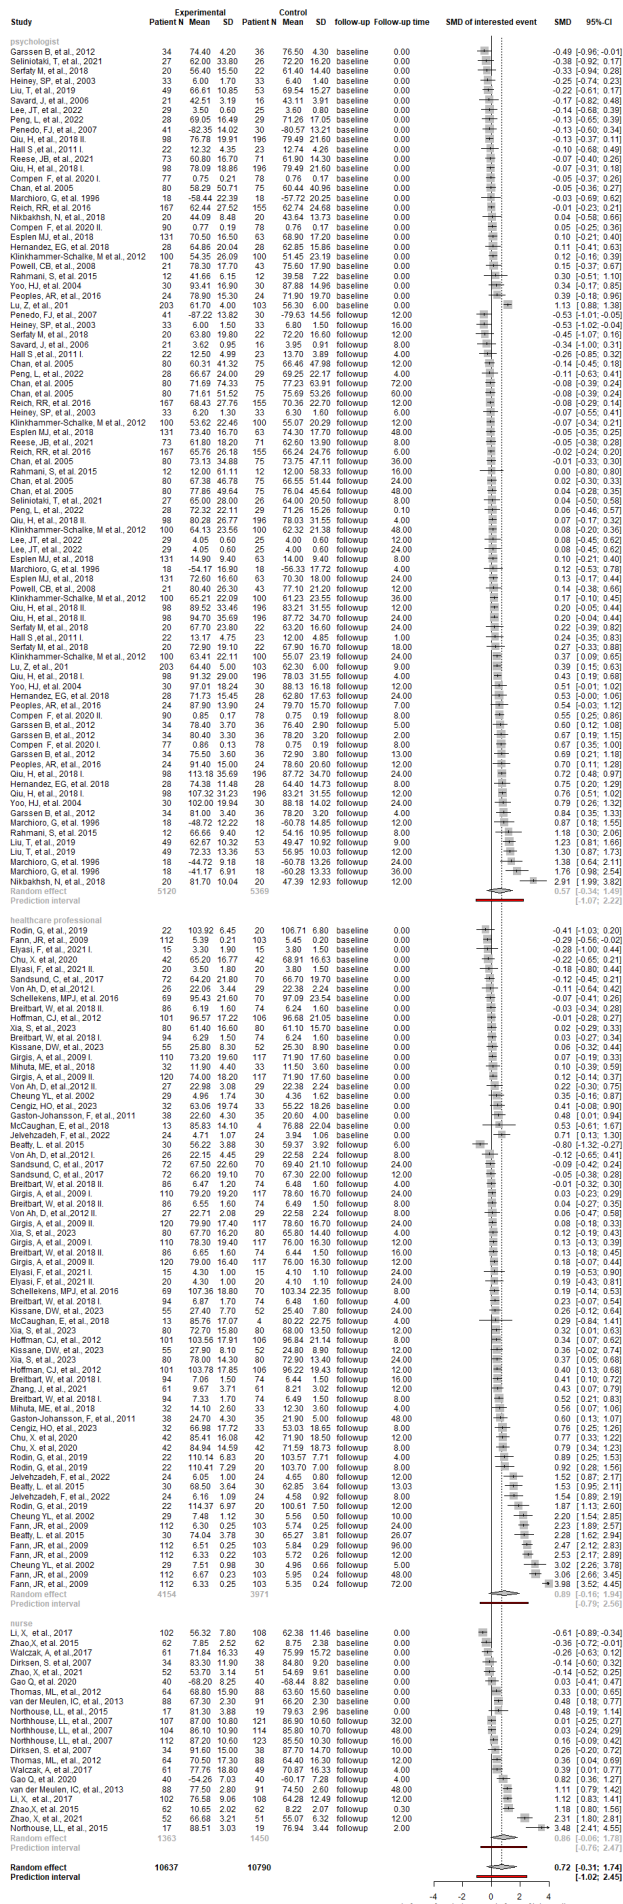

Figure S3.4. Subgroup analysis of the Global QoL. Forest plot represents the difference between the intervention vs. control group in the Global QoL domain with the provider subgroups as predicted at week 48 (post-intervention). SMD = Standardized mean difference, CI = confidence interval

## S4.Subgroup analysis of Global QoL: Environment



**Figure S4.1.T0**

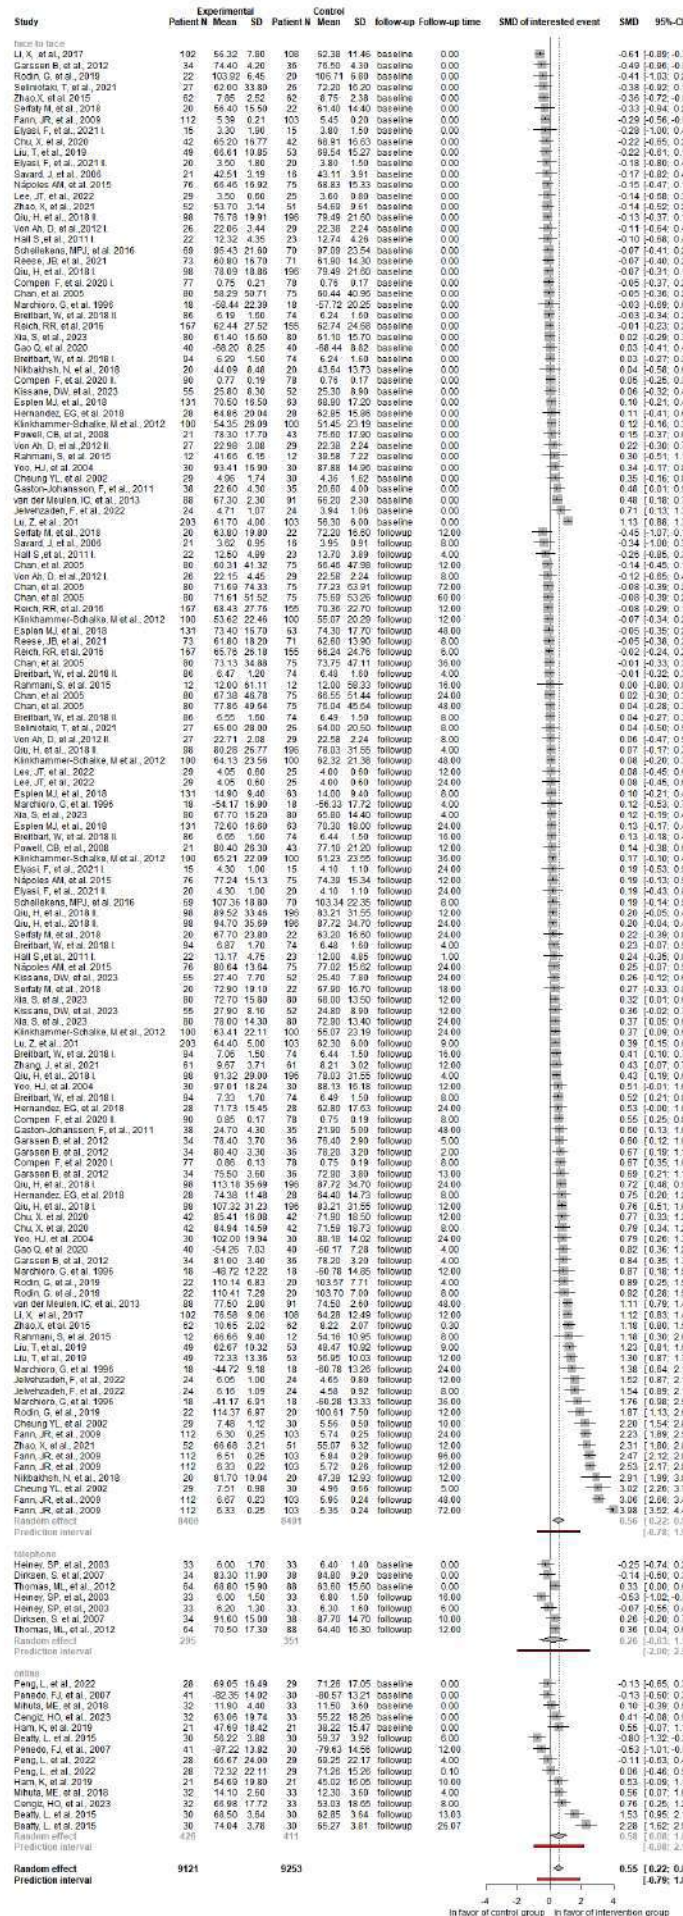

**Figure S4.2.T12**

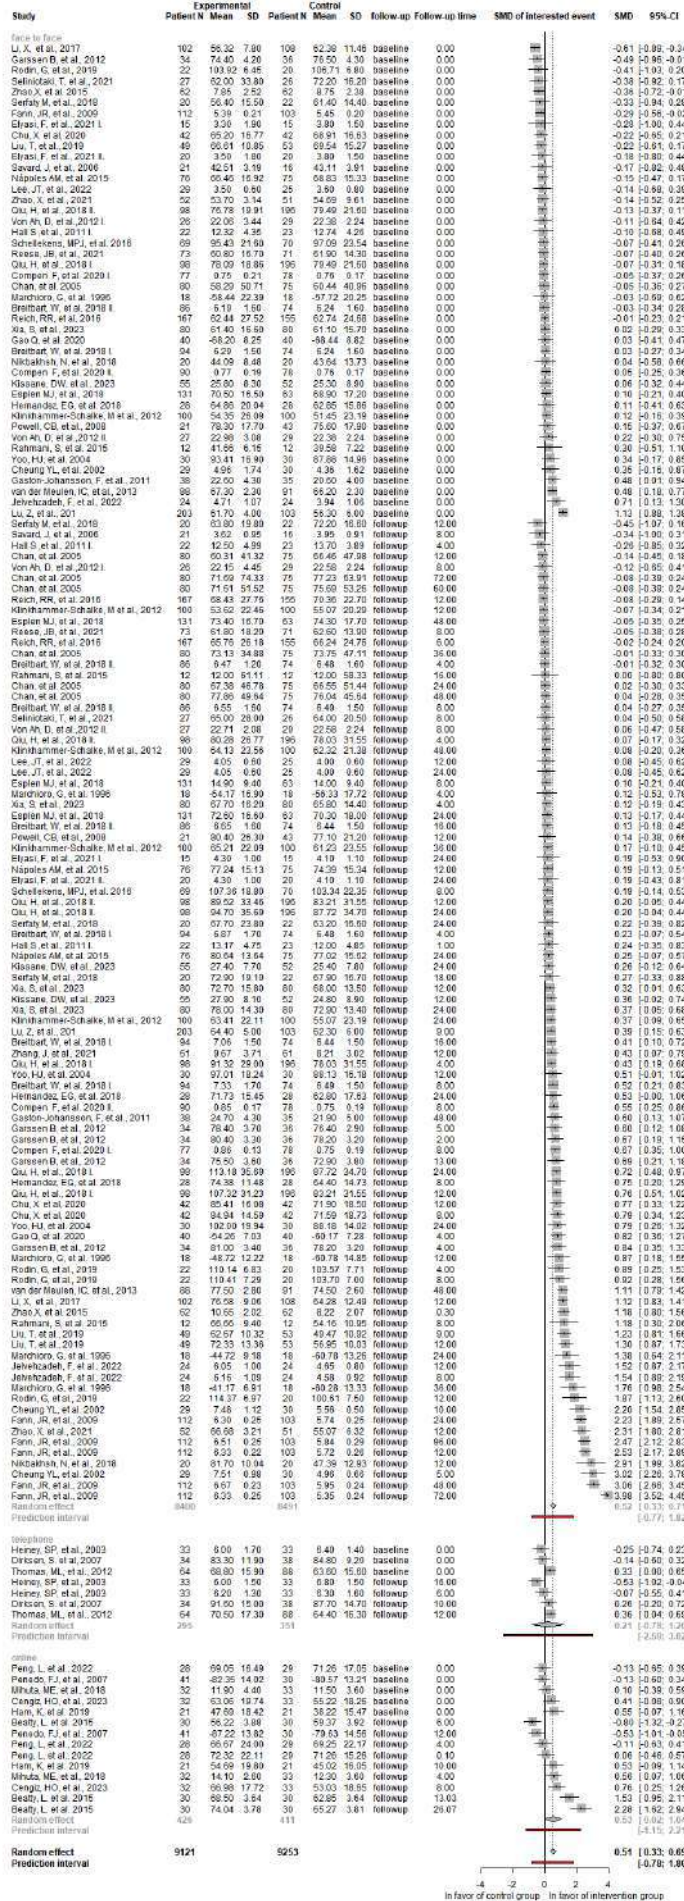

Figure S4.3.T24

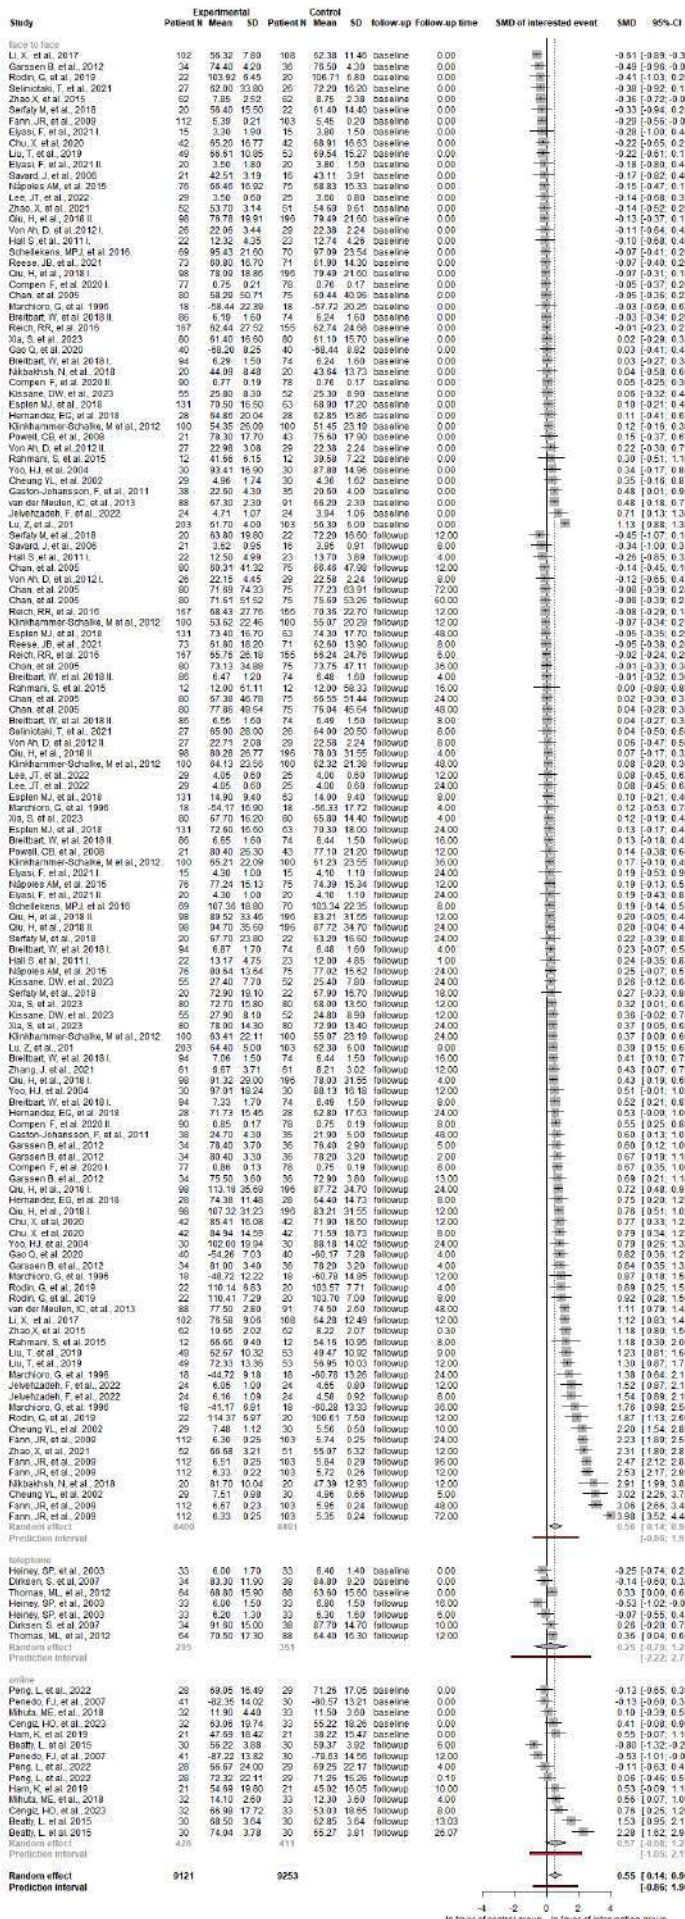



## S5.Subgroup analysis of Global QoL: Type

**Figure S5.1.T0**

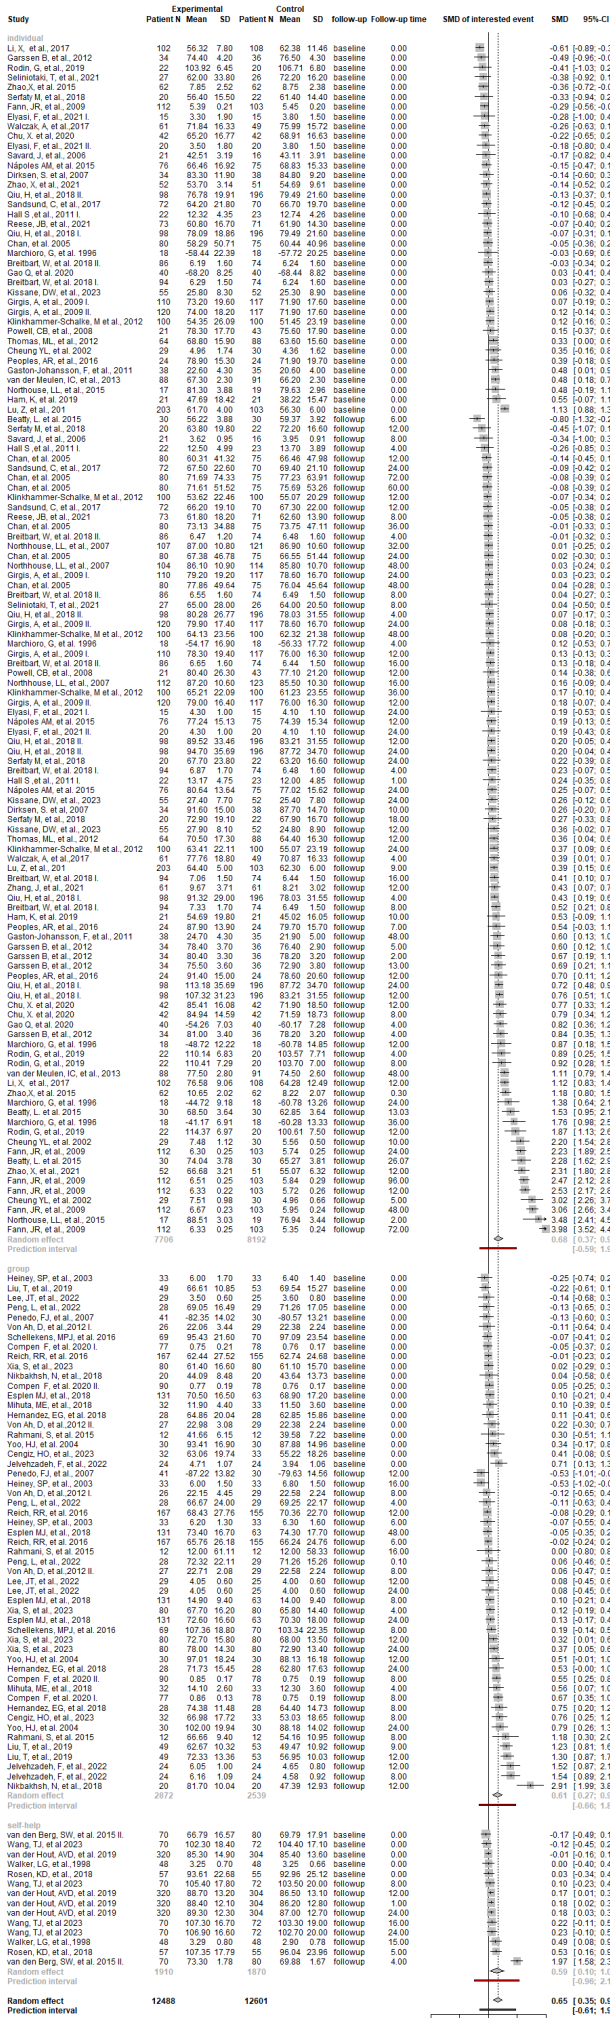

Figure S5.2.I12

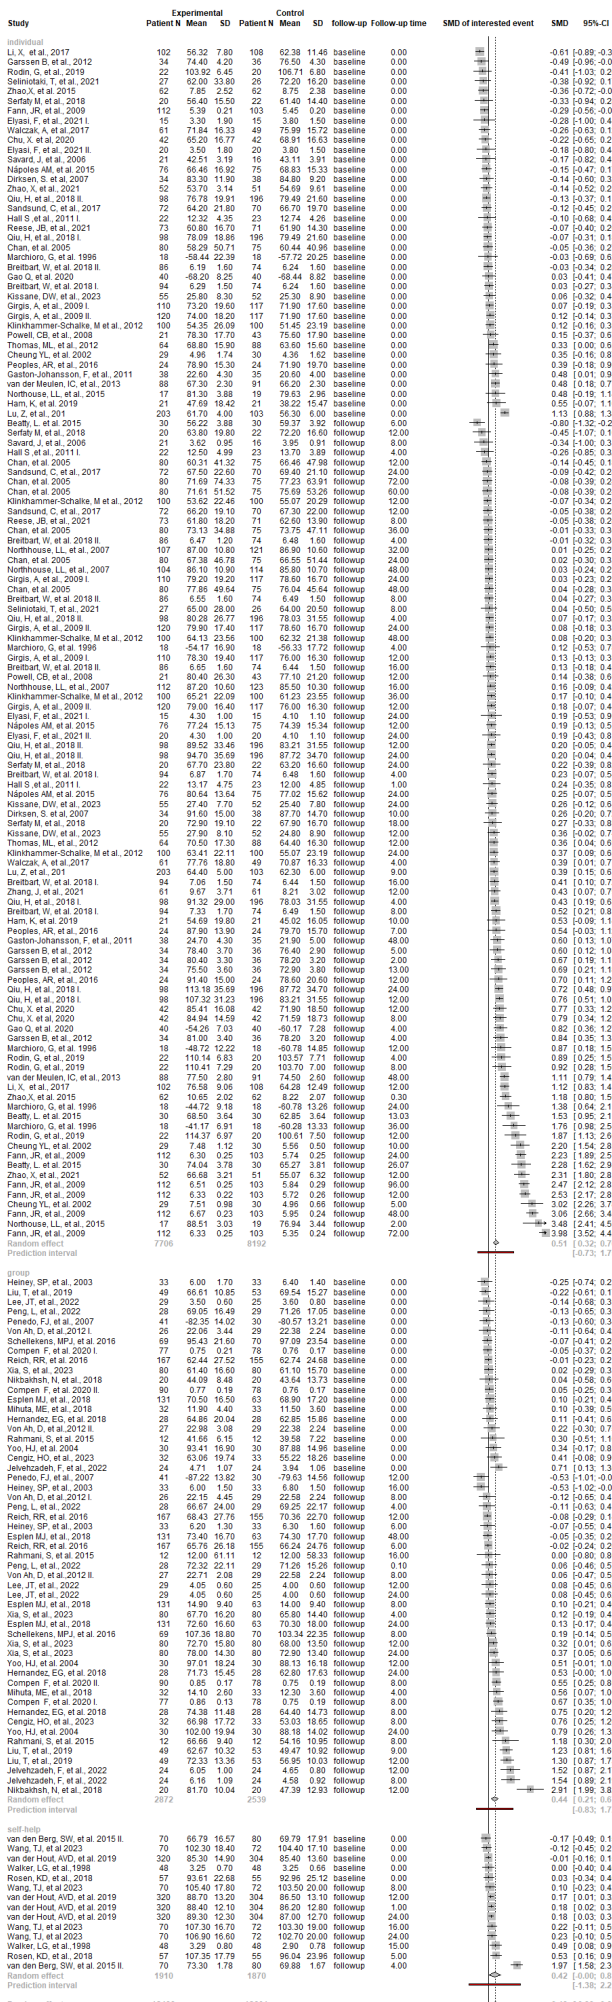

Figure S5.3.T24

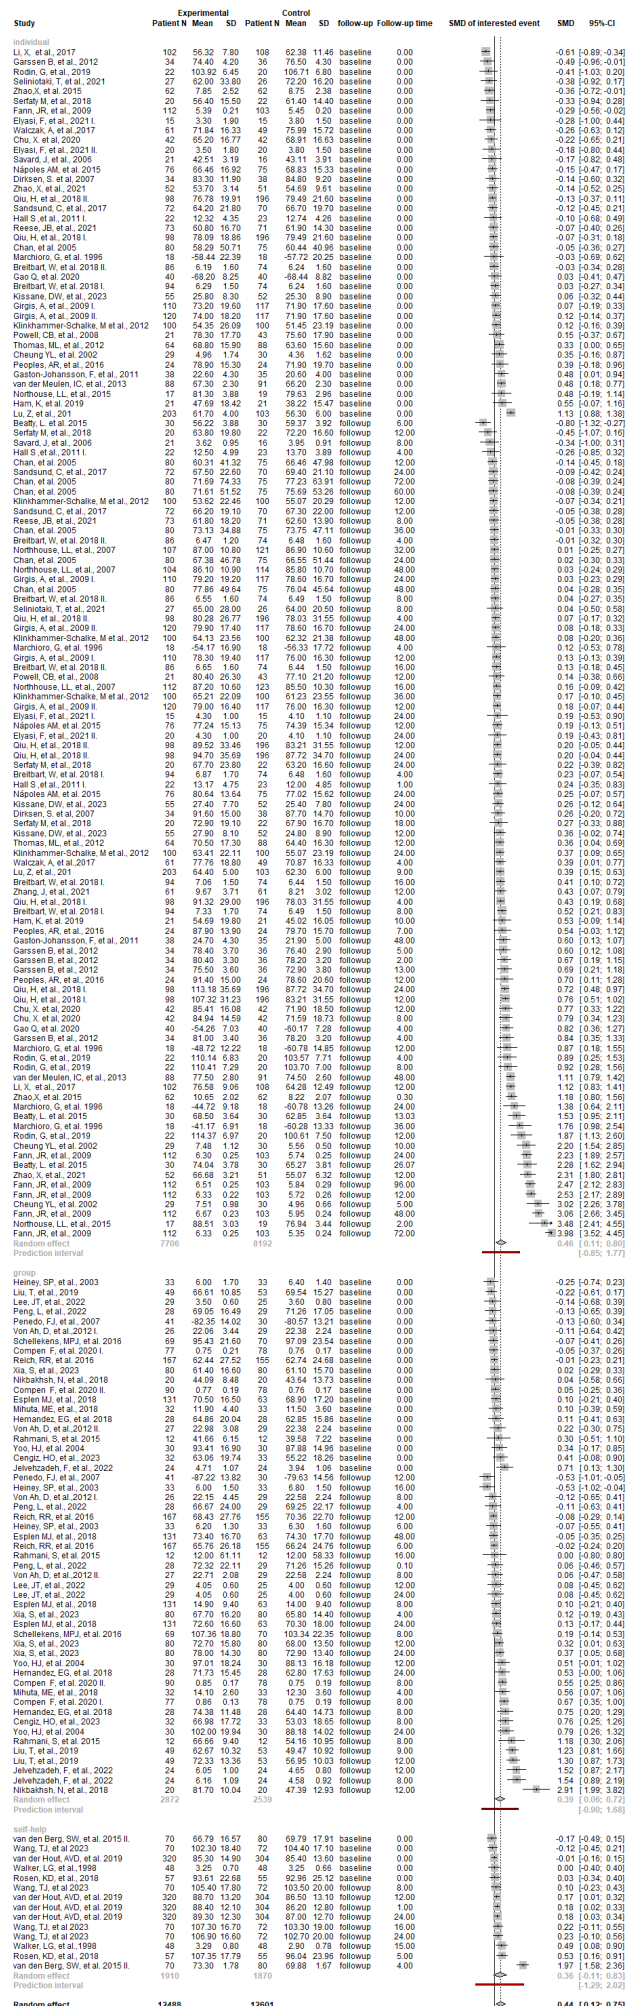



Figure S5.4.T48

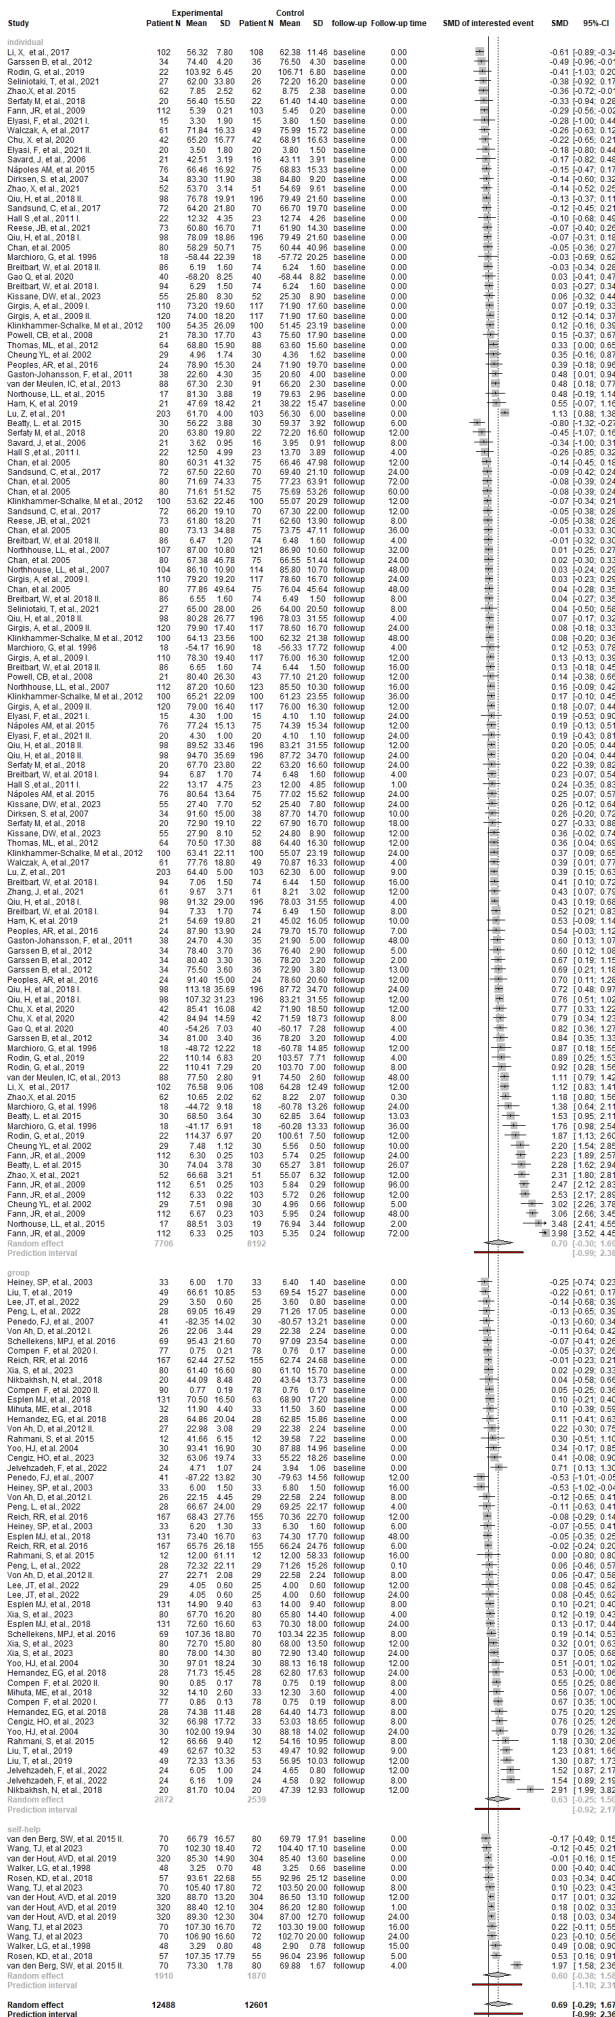

## S6. Subgroup analysis of Global QoL: Cancer Stage

**Figure S6.1.T0**

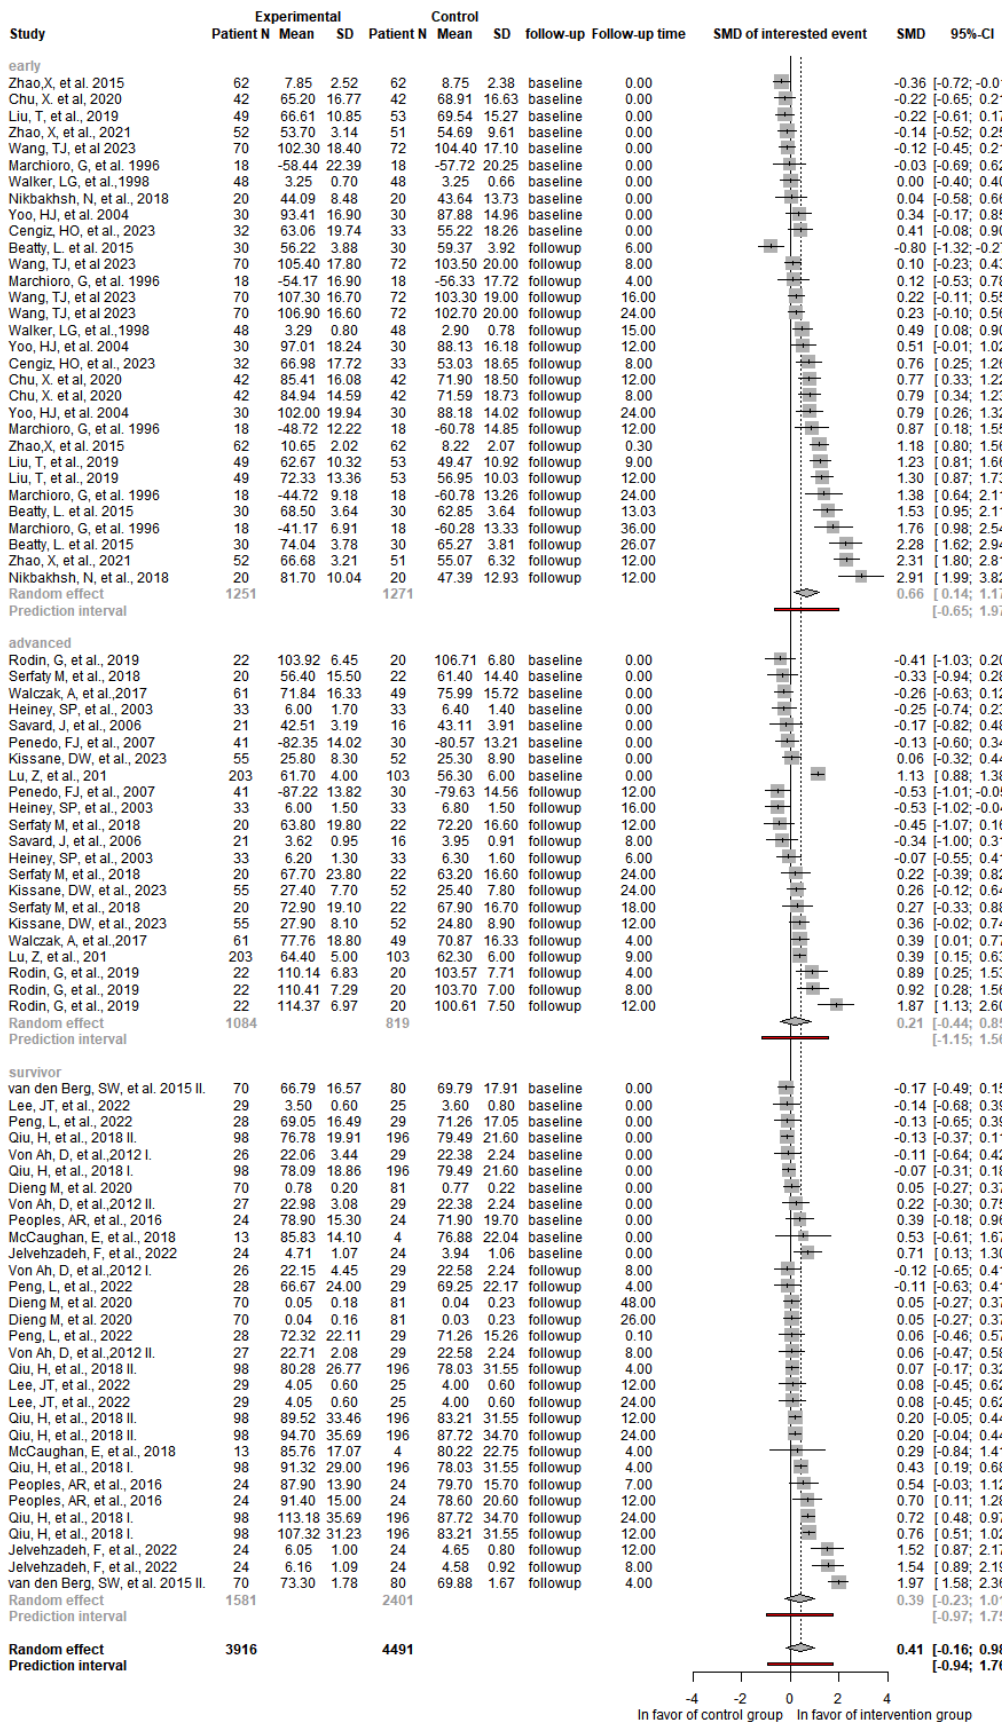

Figure S6.2.T12

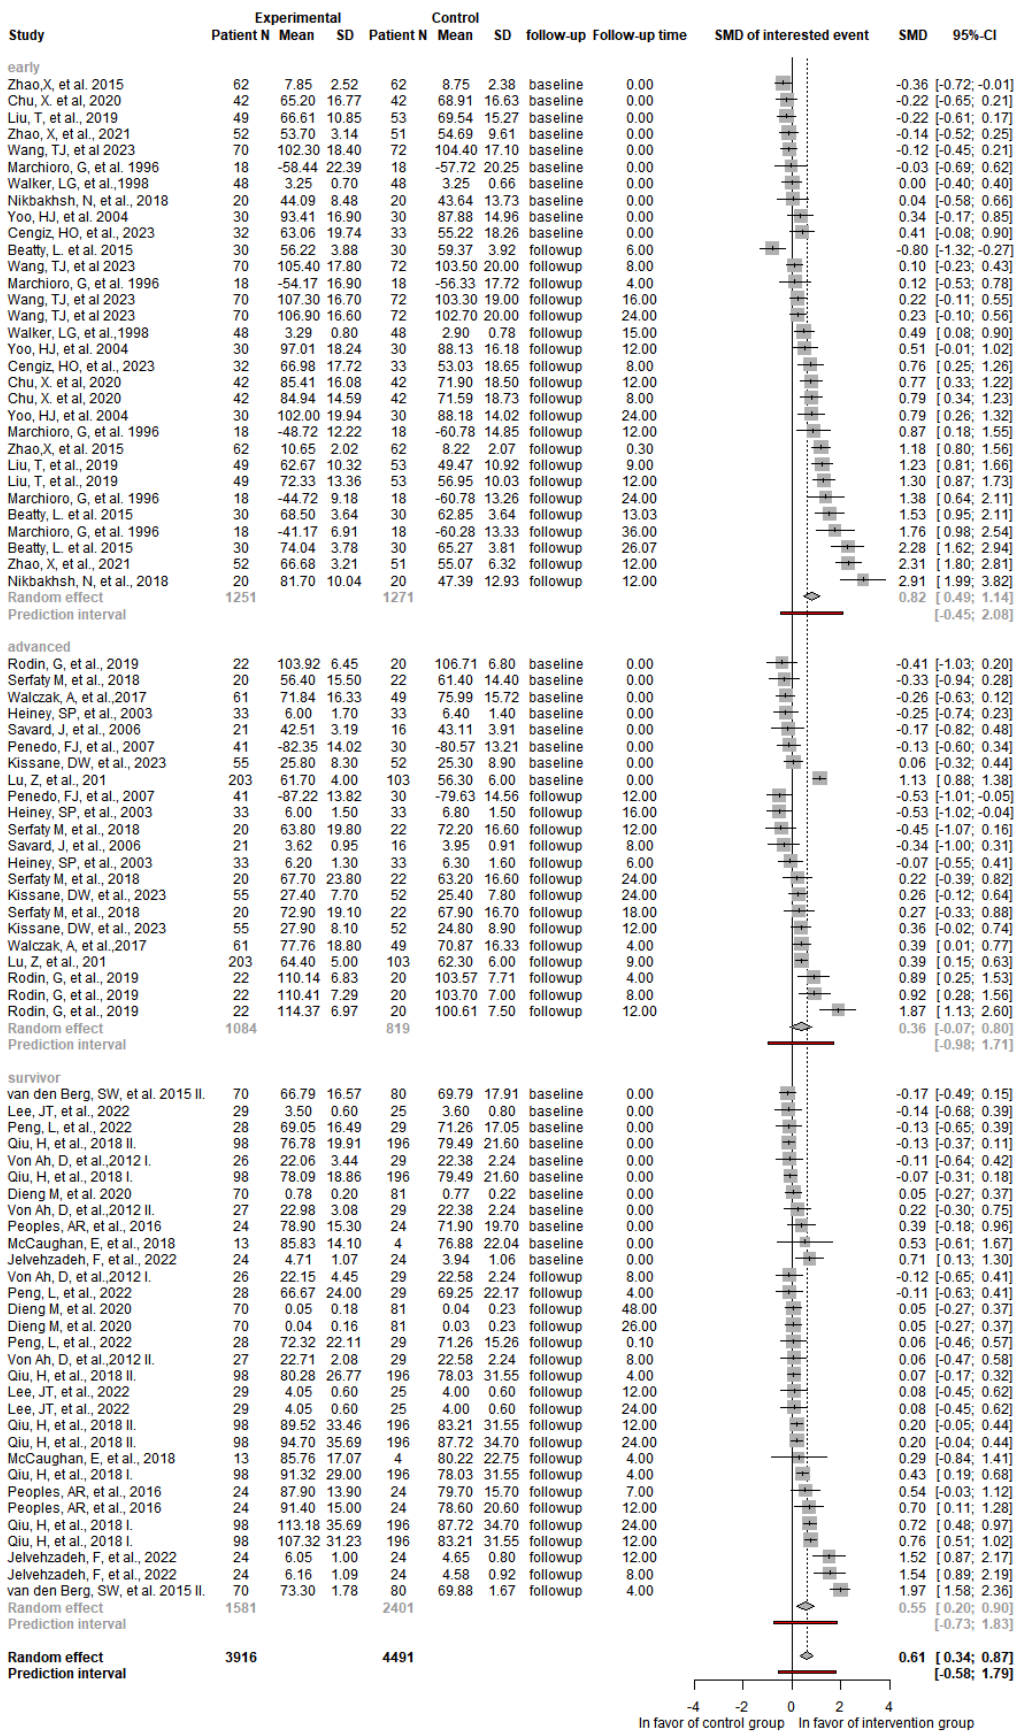

Figure S6.2. Forest plot represents the difference between the intervention vs. control group in the Global QoL domain with the cancer stage subgroups as predicted at week 12 (post-intervention). SMD - Standardized mean difference, CI - confidence interval.

Figure S6.3.T24

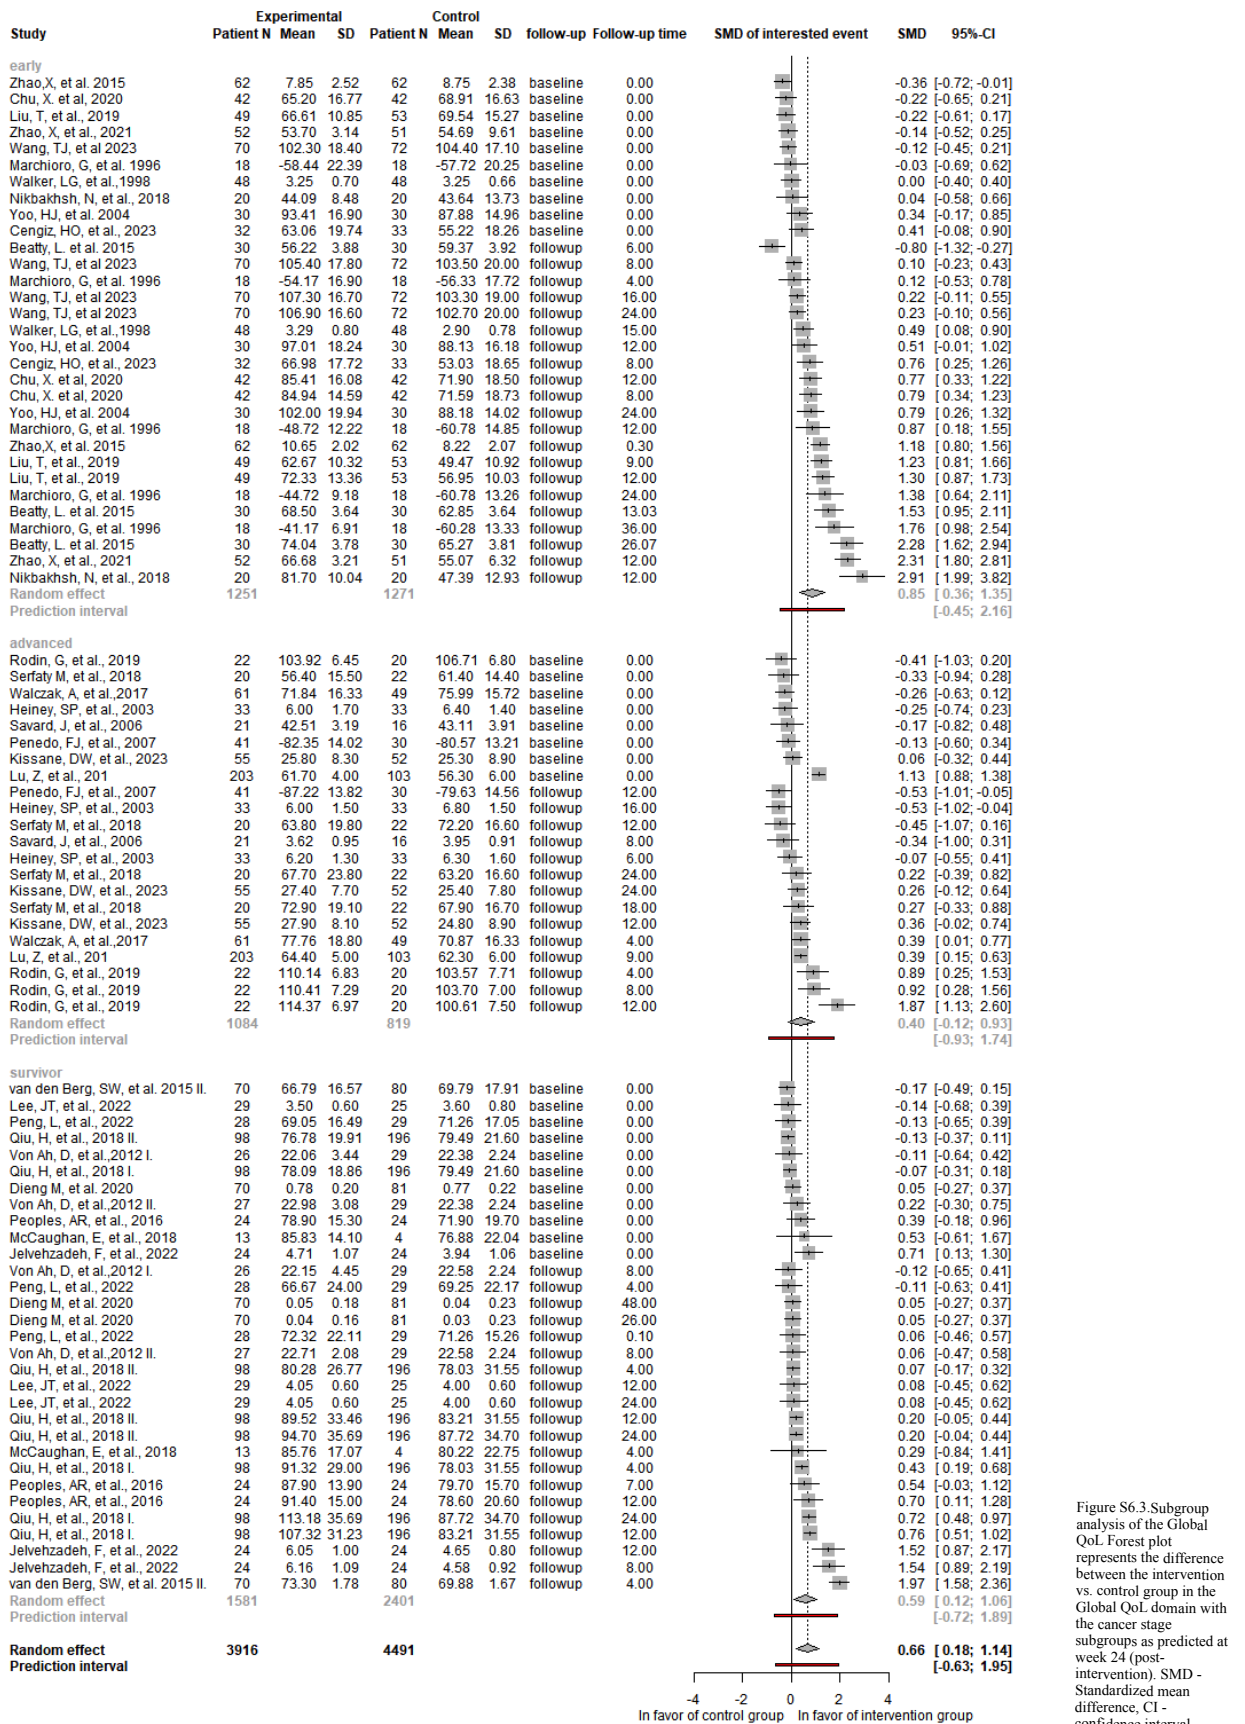

Figure S6.3. Subgroup analysis of the Global QoL. Forest plot represents the difference between the intervention vs. control group in the Global QoL domain with the cancer stage subgroups as predicted at week 24 (post-intervention). SMD - Standardized mean difference, CI - confidence interval.

**Figure S6.4.T48**

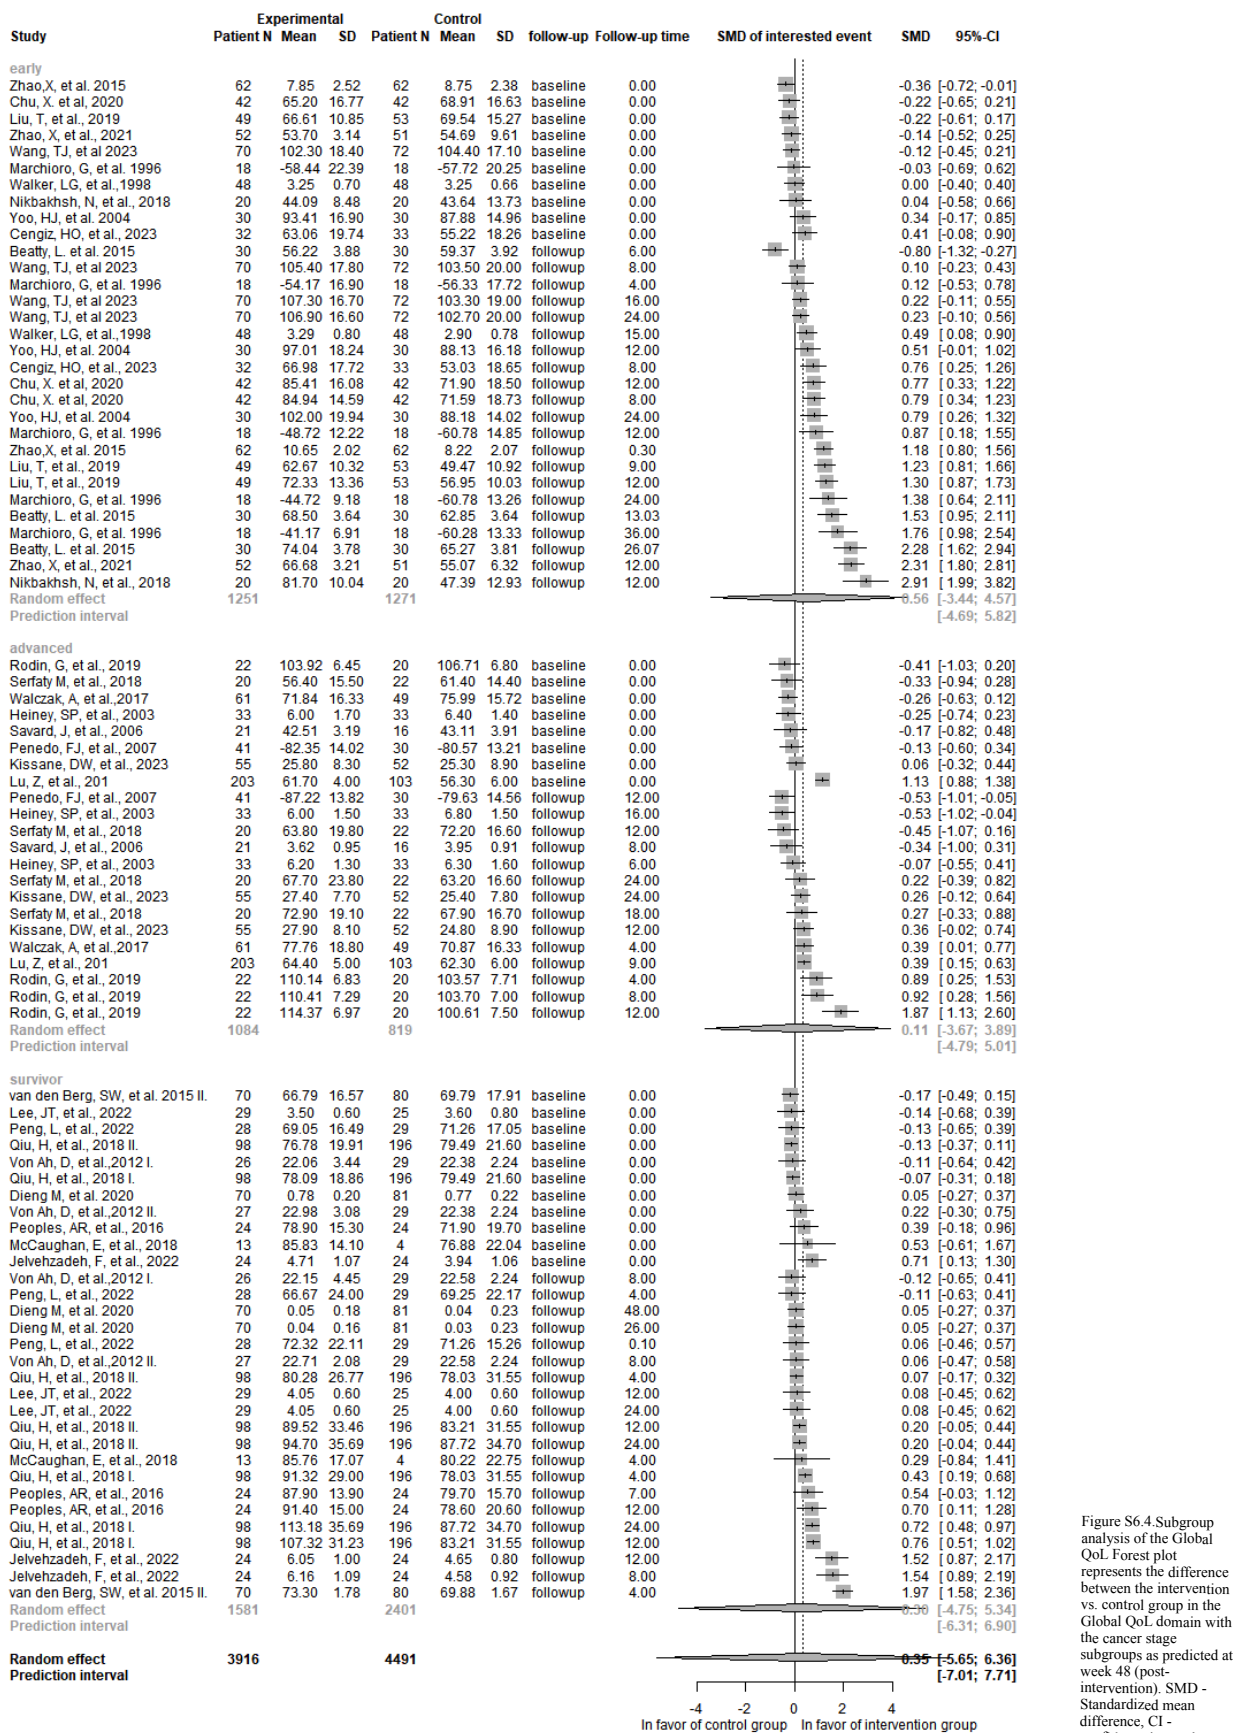

Figure S6.4 Subgroup analysis of the Global QoL. Forest plot represents the difference between the intervention vs. control group in the Global QoL domain with the cancer stage subgroups as predicted at week 48 (post-intervention). SMD - Standardized mean difference, CI - confidence interval.

## S7. Subgroup analysis of Global QoL: Cancer type

Figure S7.1.T0

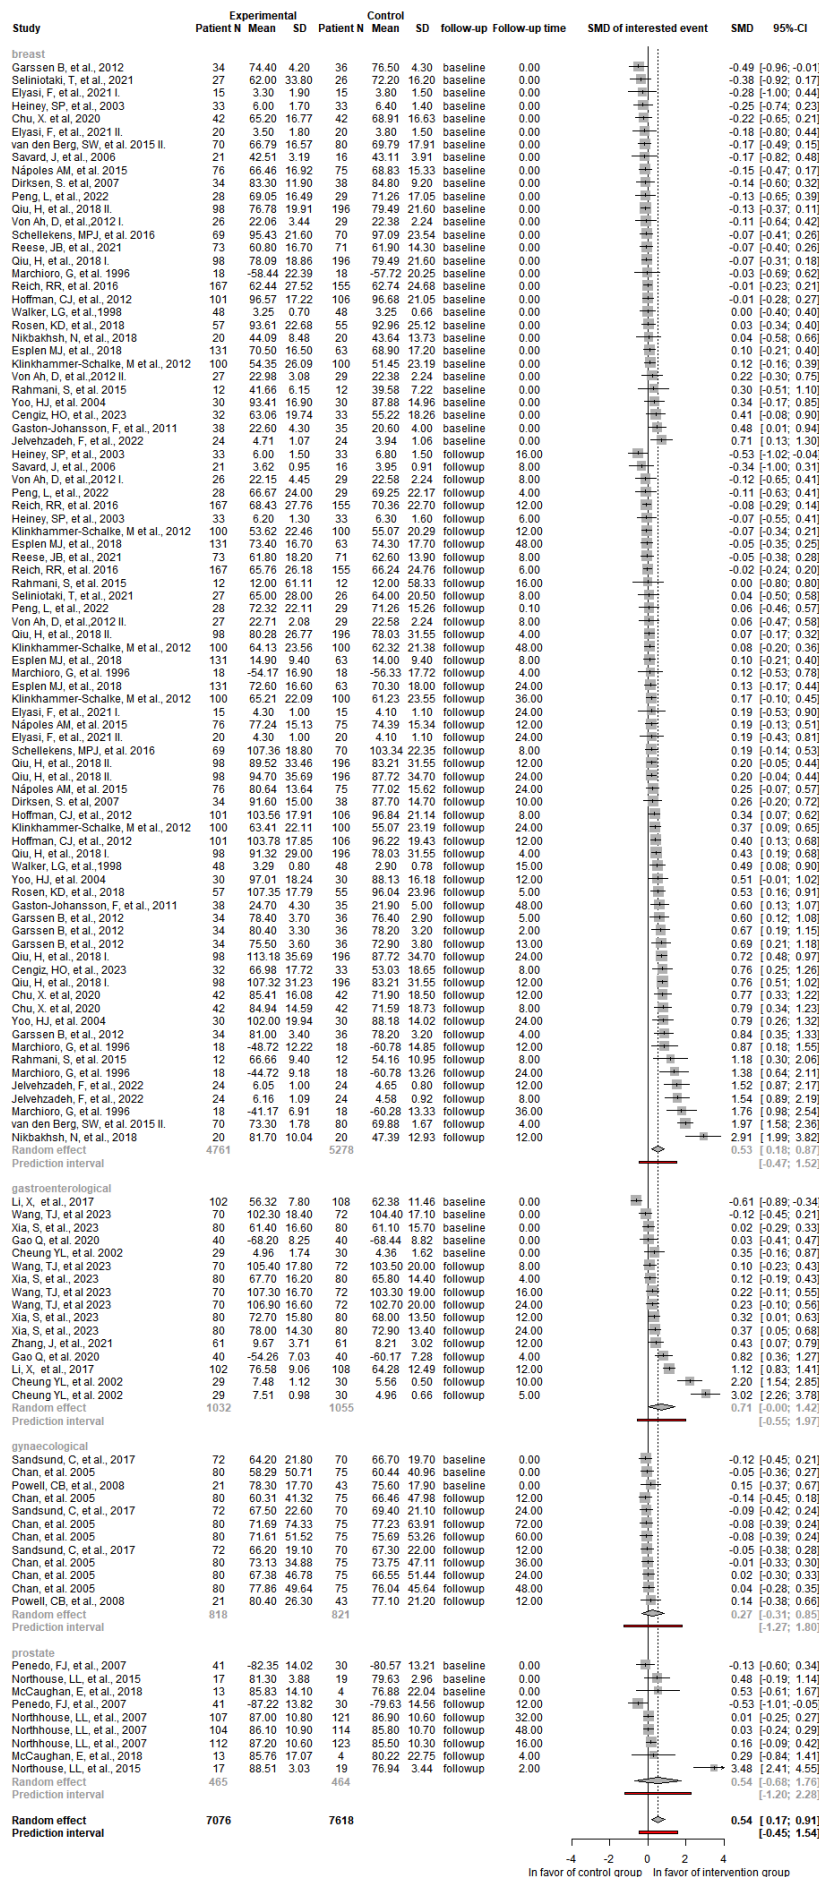



Figure S7.2.T12

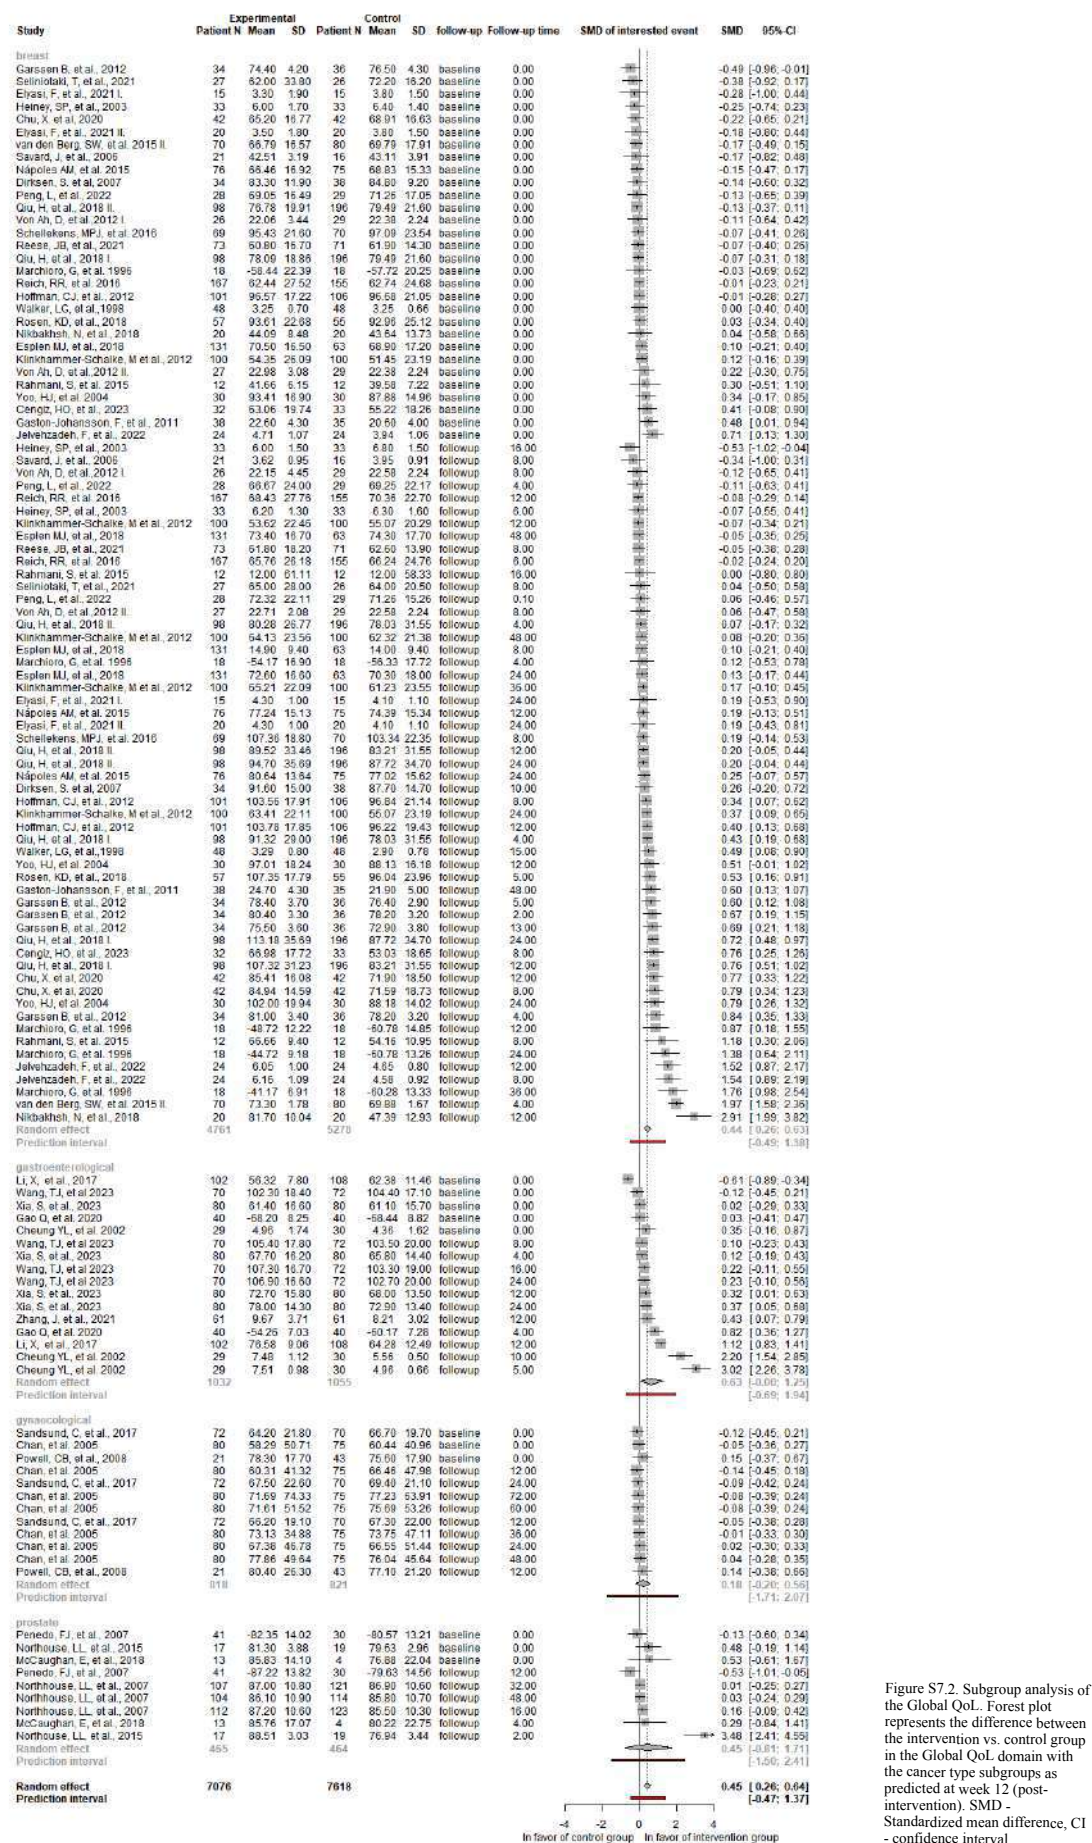

Figure S7.3.T24

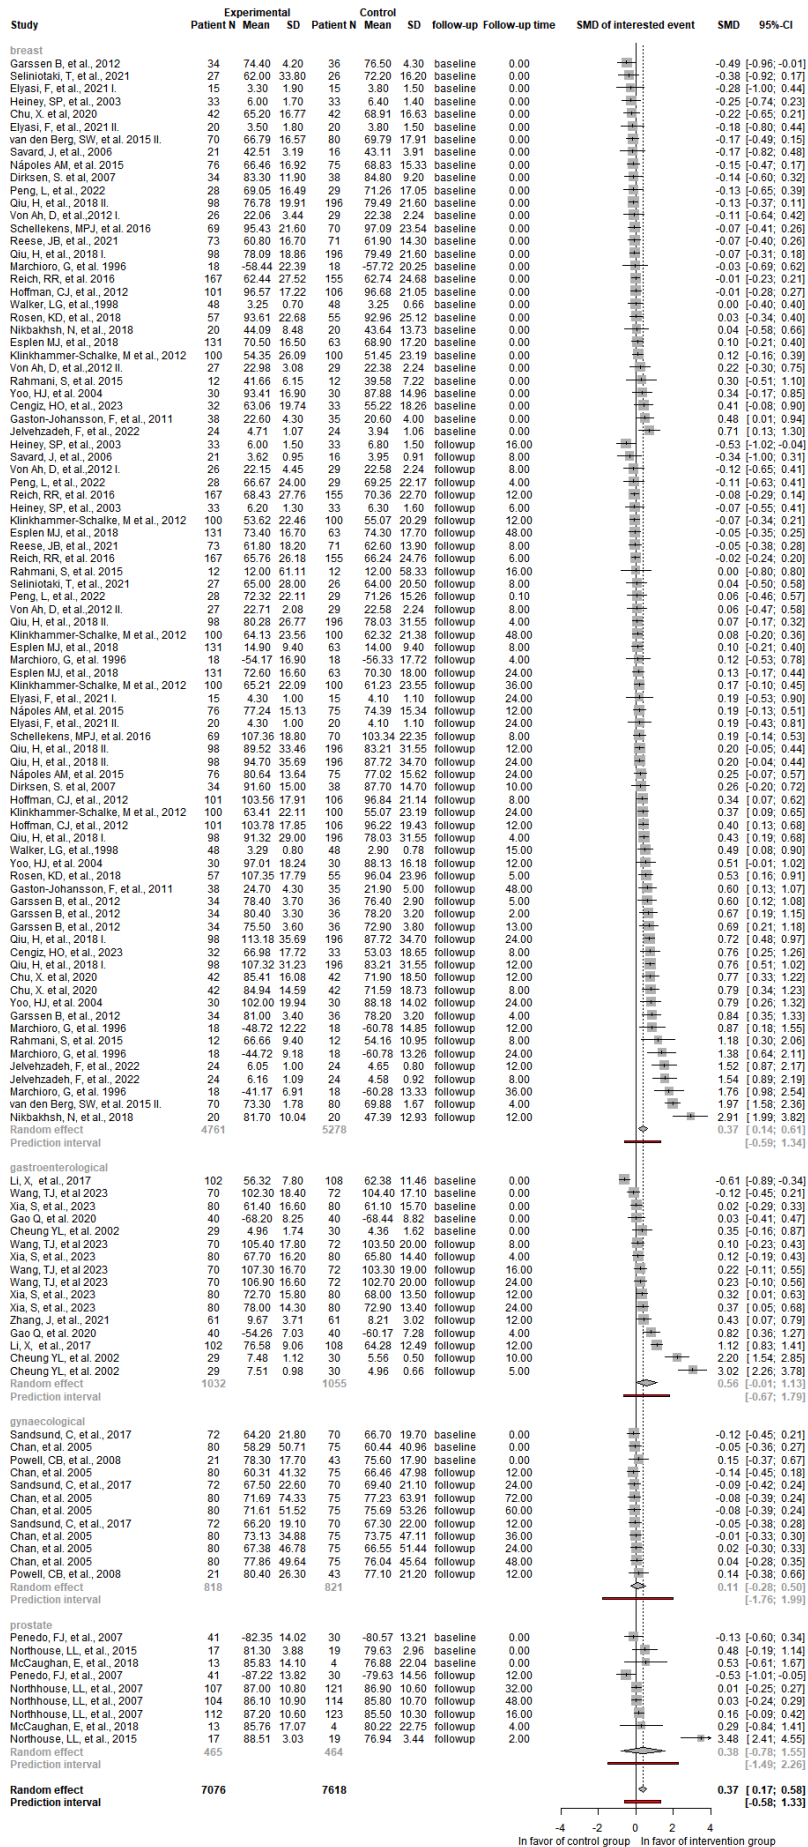

Figure S7.4.T48

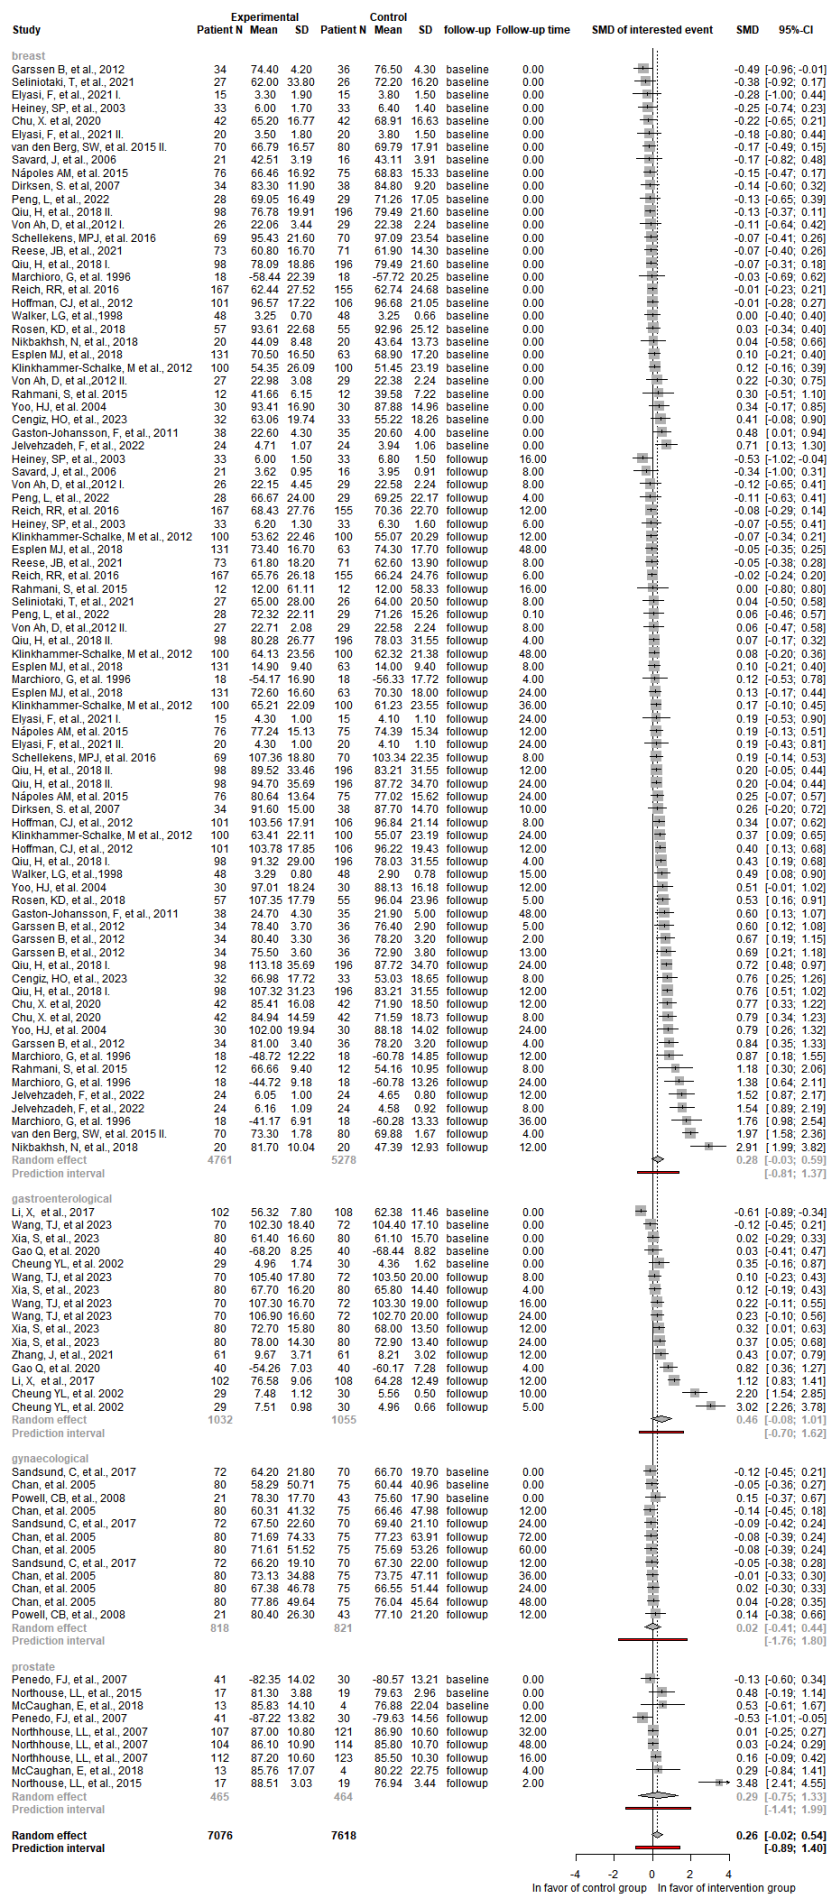

## S8.Subgroup analysis of Emotional QoL: Provider

Figure S8.1.T0

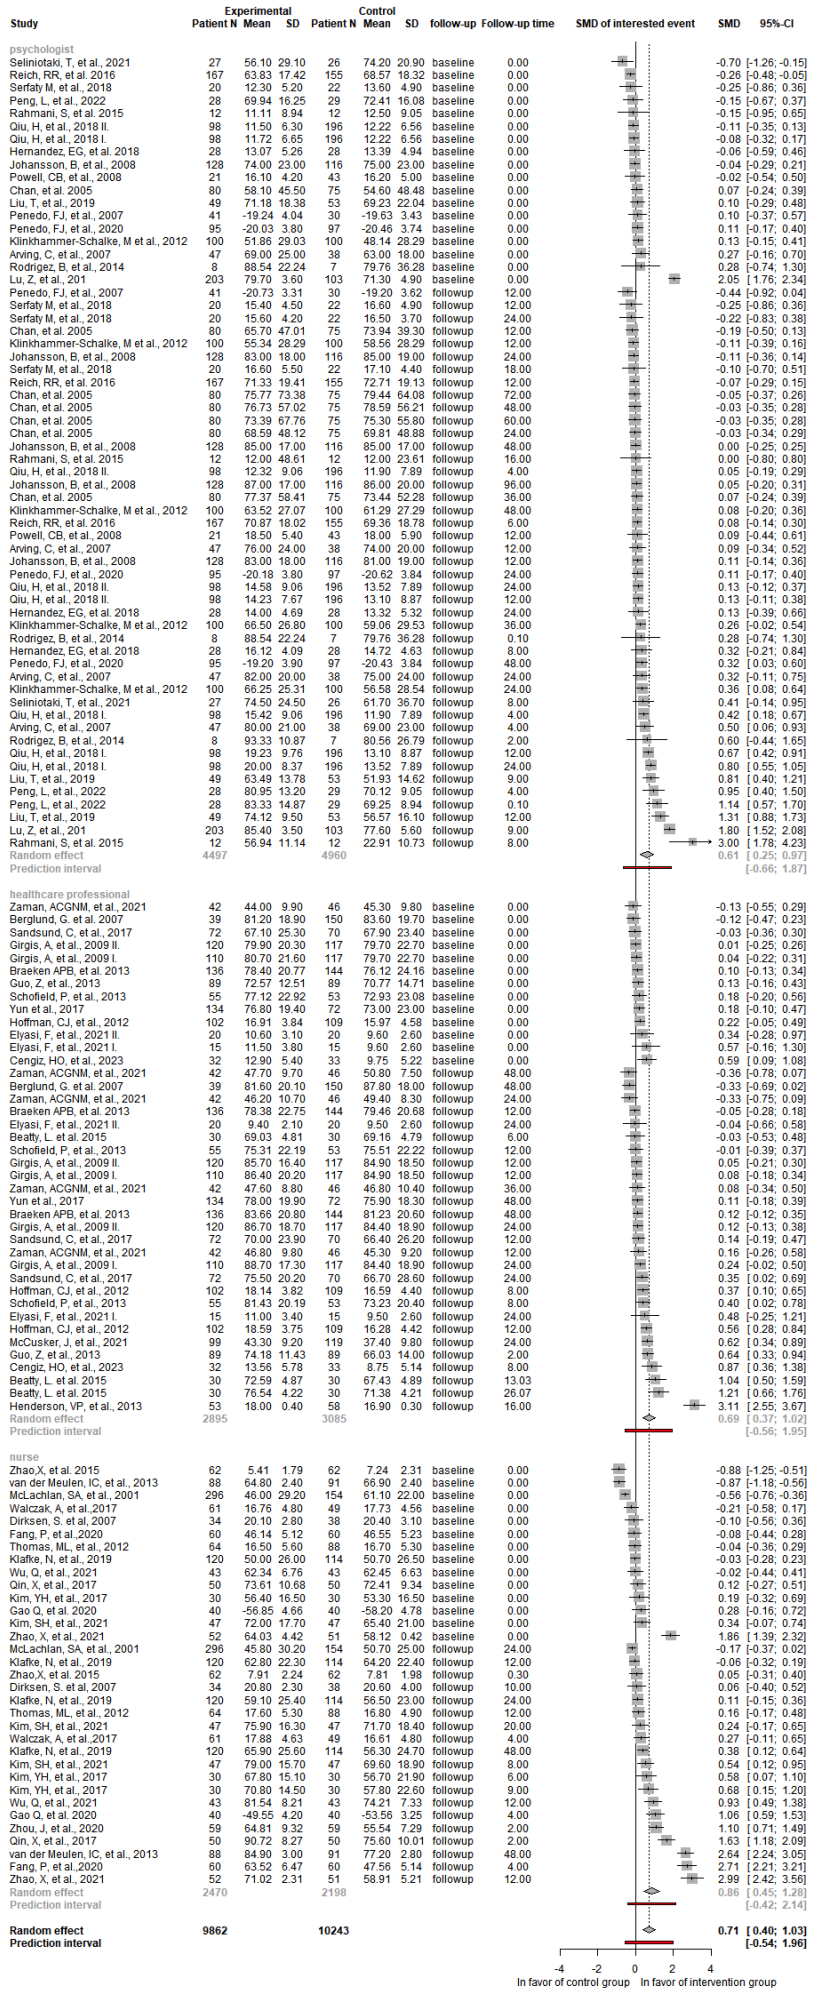

Figure S8.2.T12

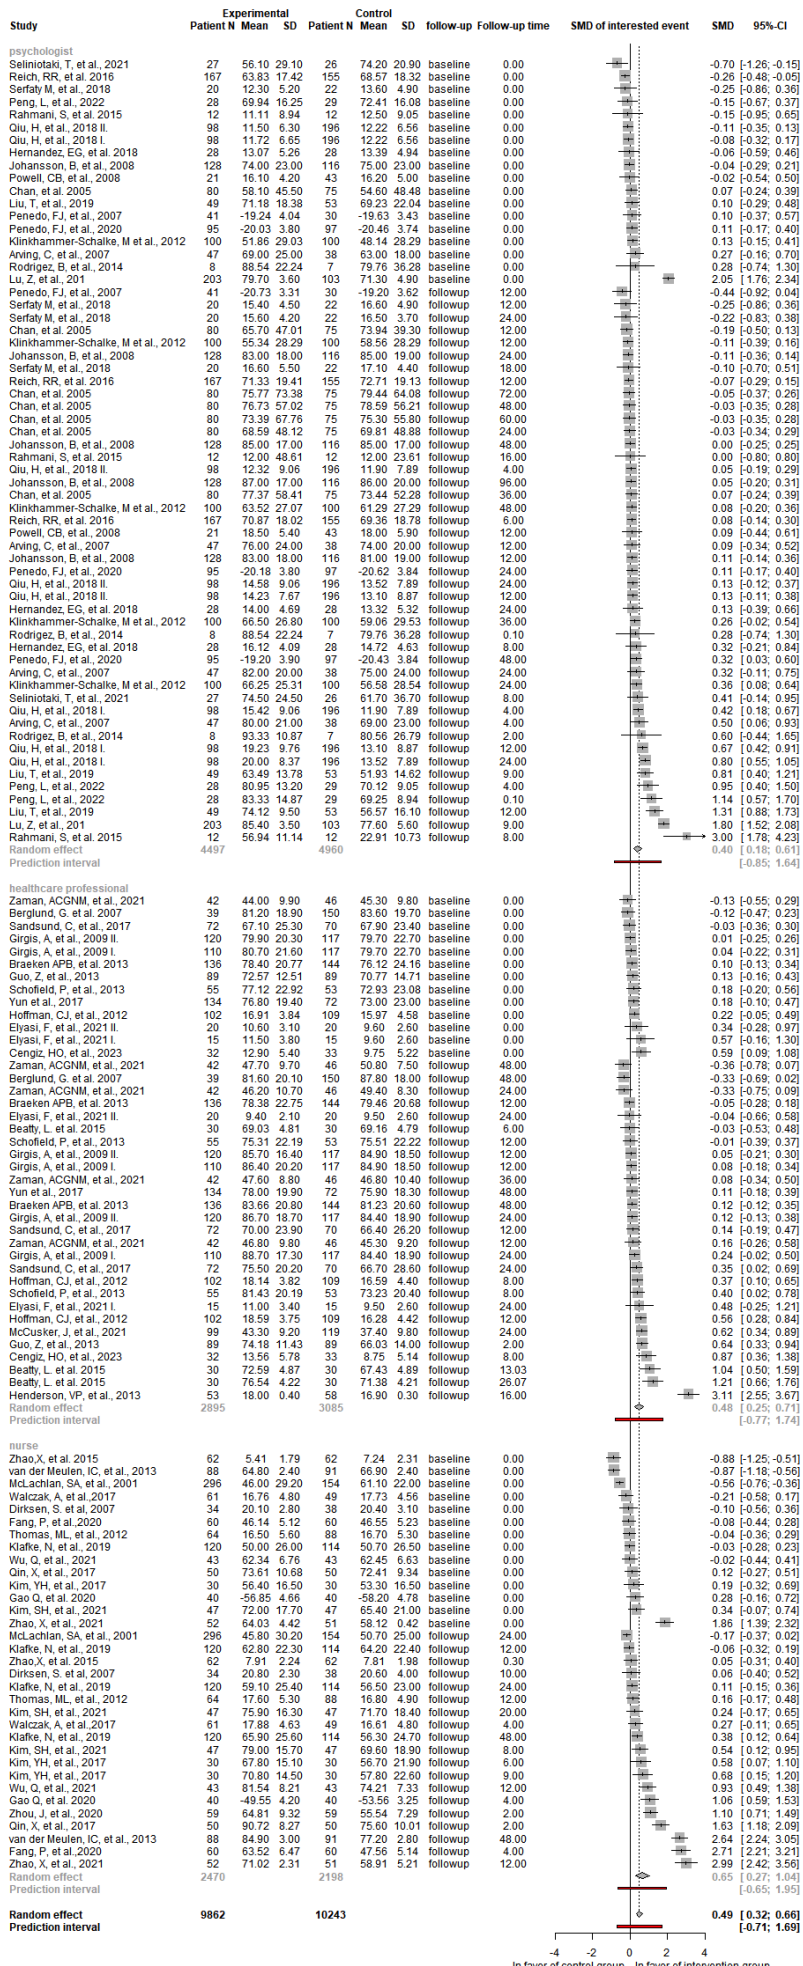

Figure S8.3.T24

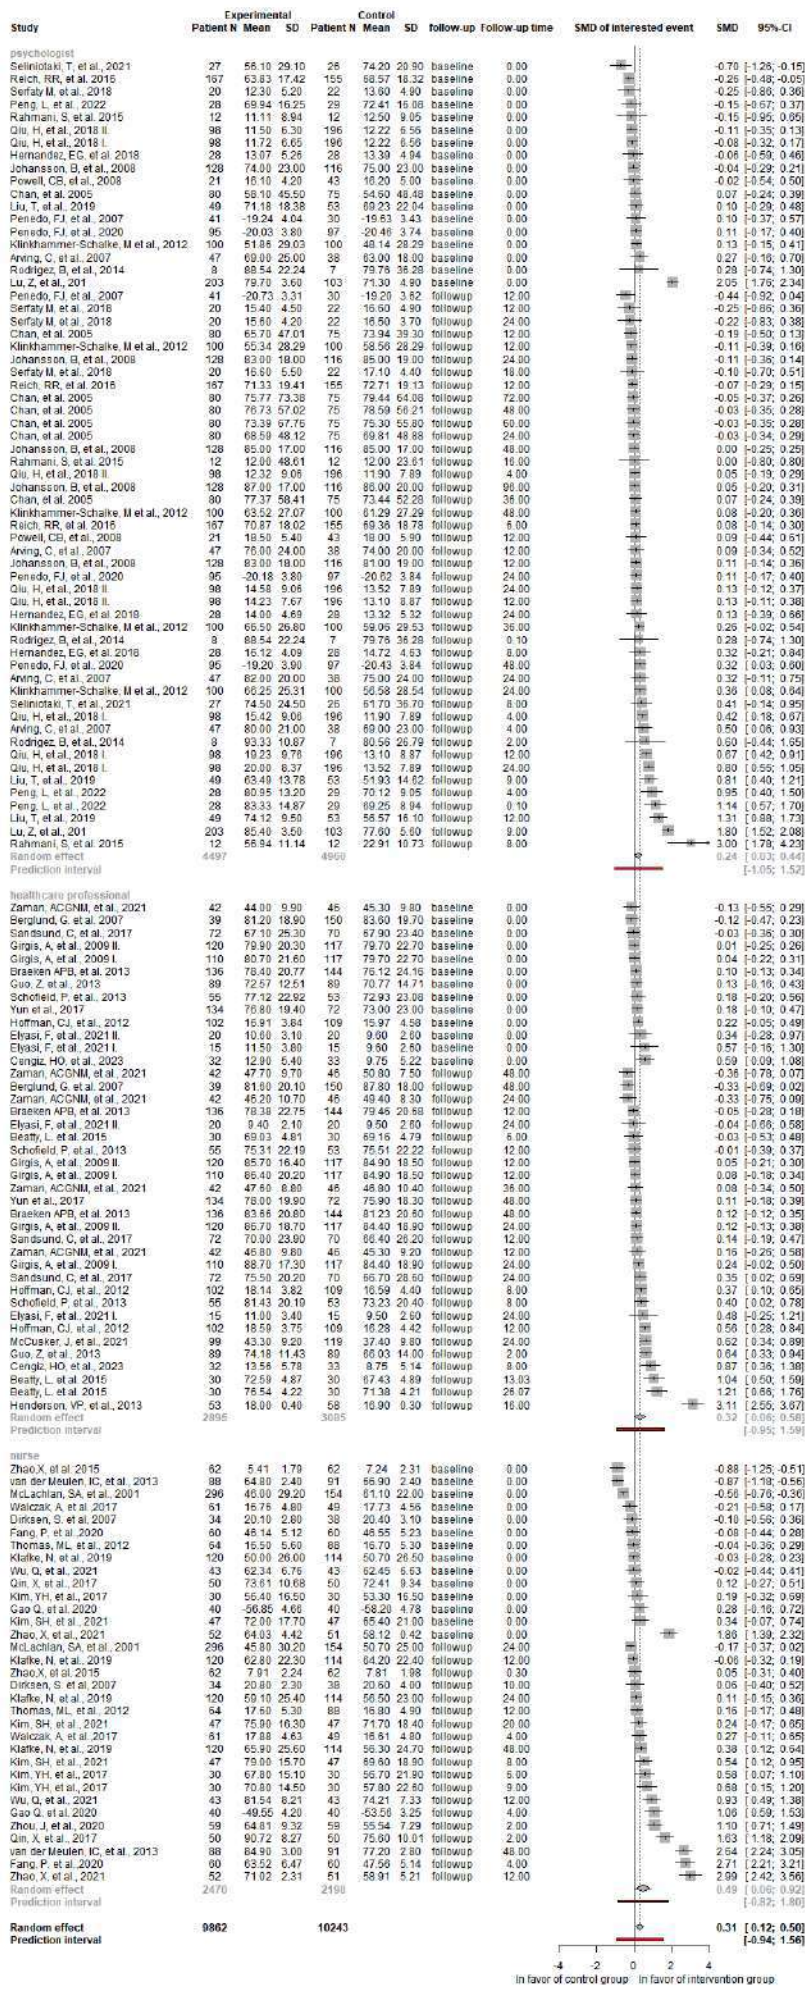

Figure S8.4.T48

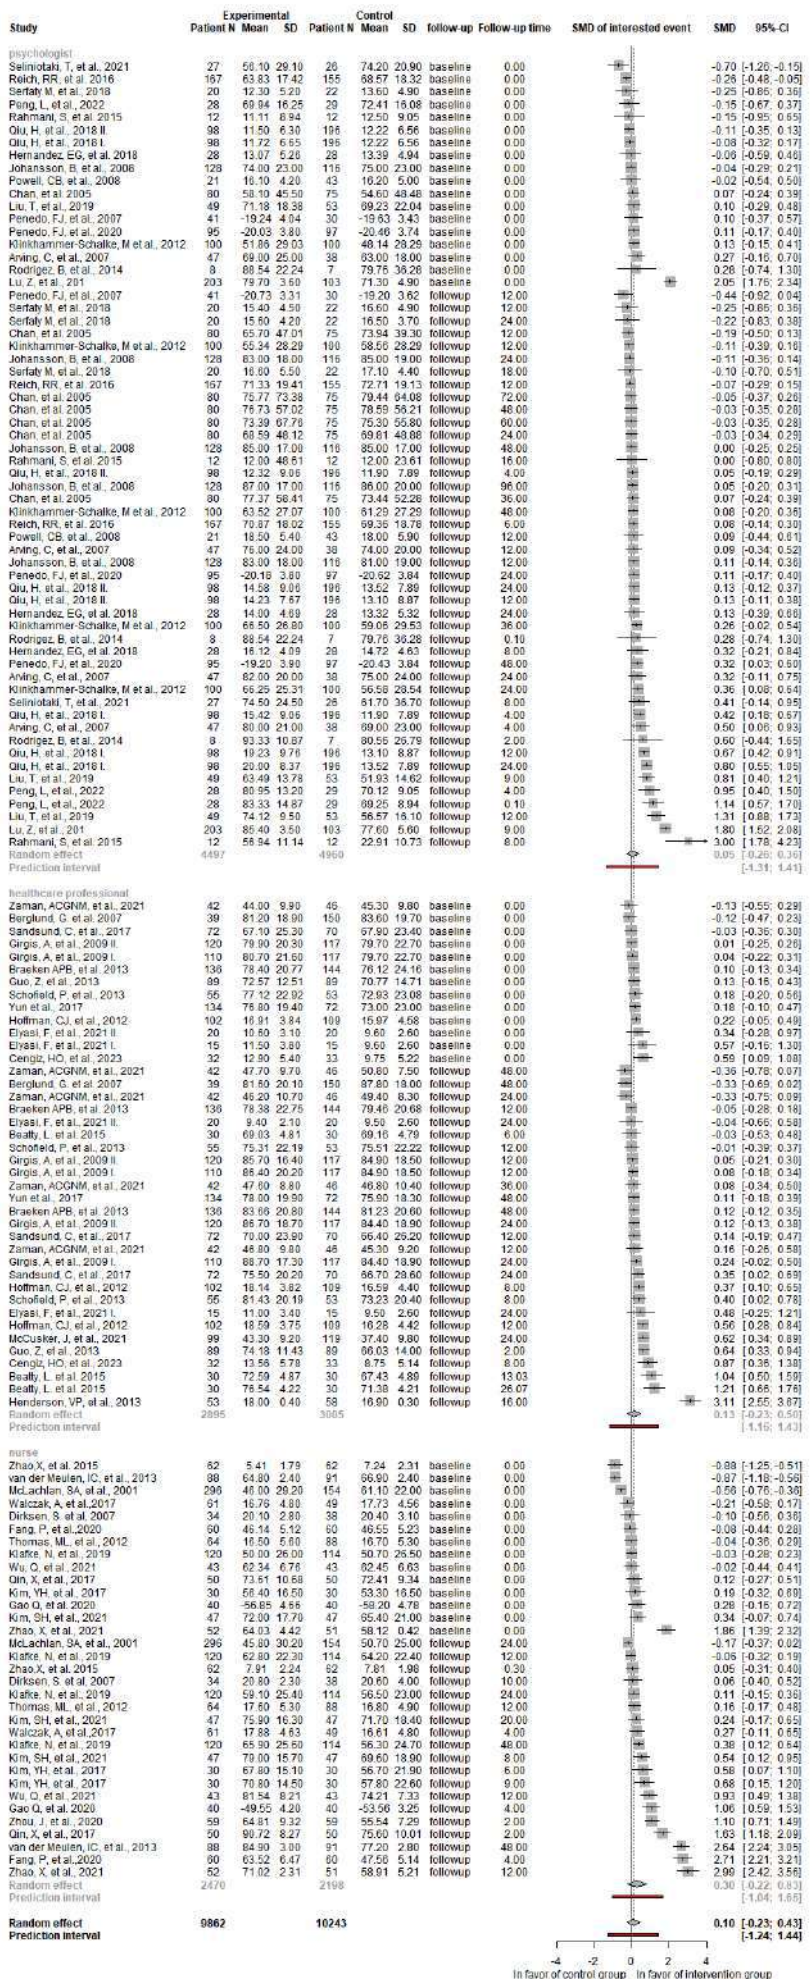



## S9.Subgroup analysis of Emotional QoL: Environment

Figure S9.1.T0

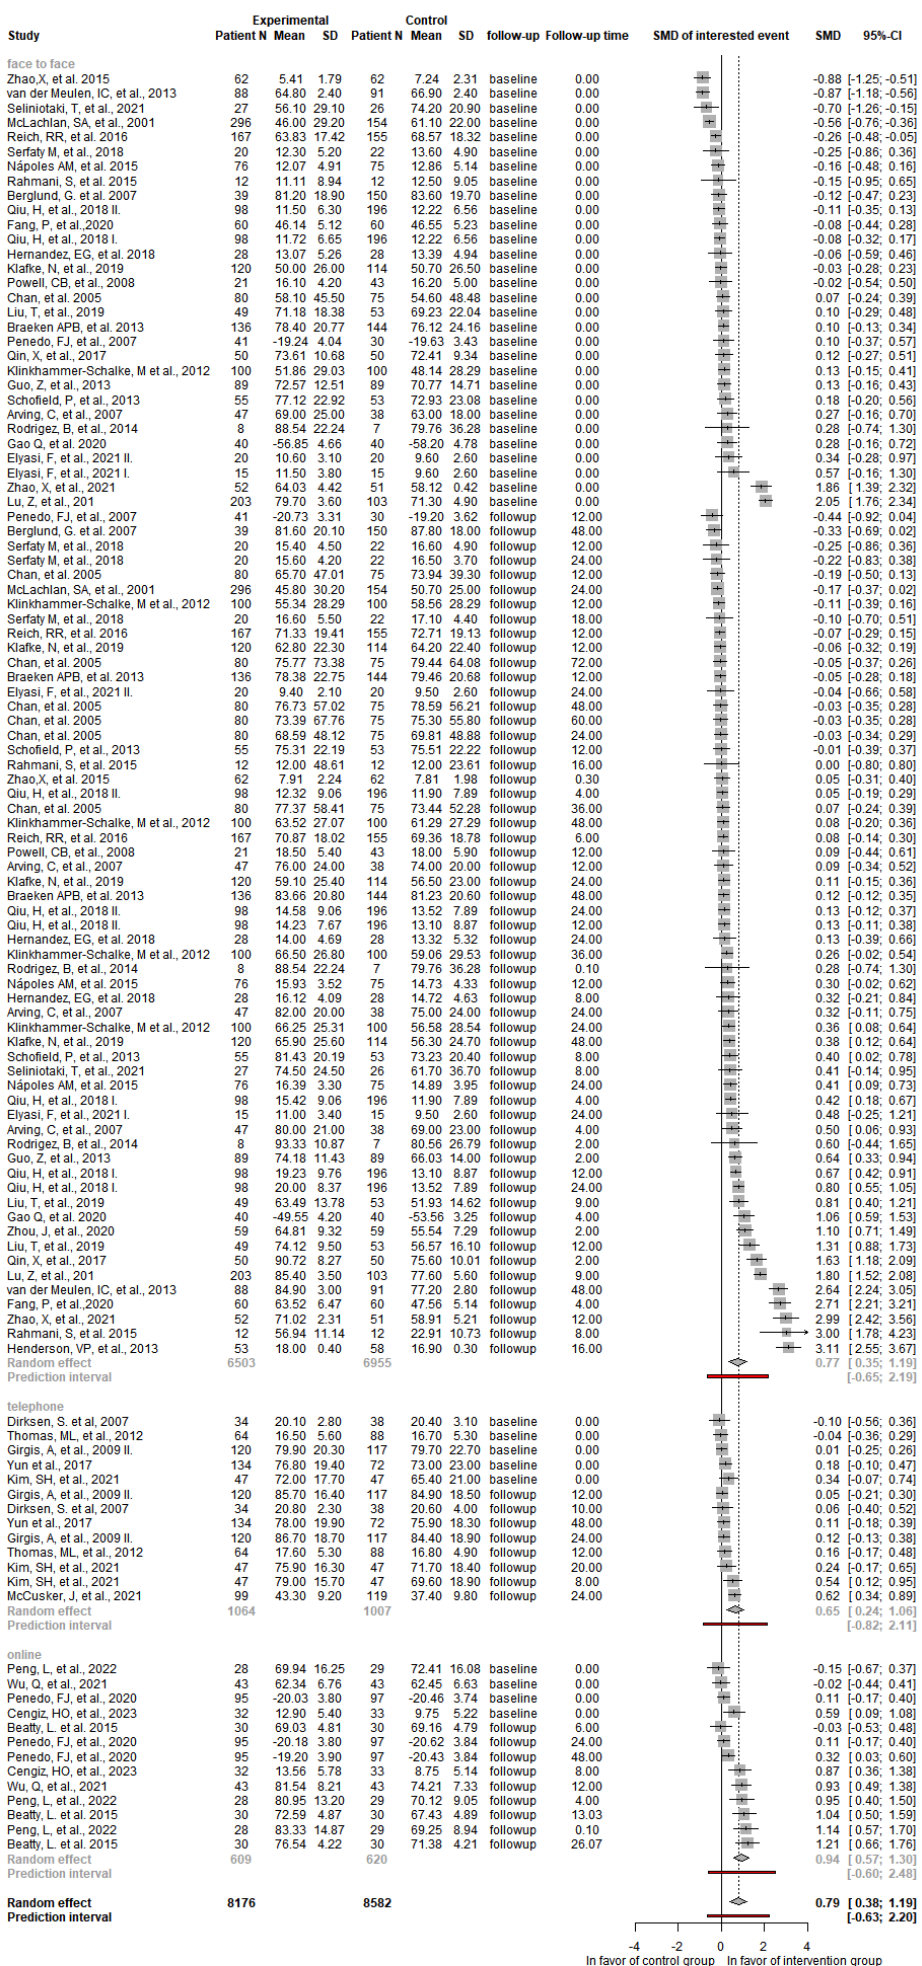

Figure S9.2.T12

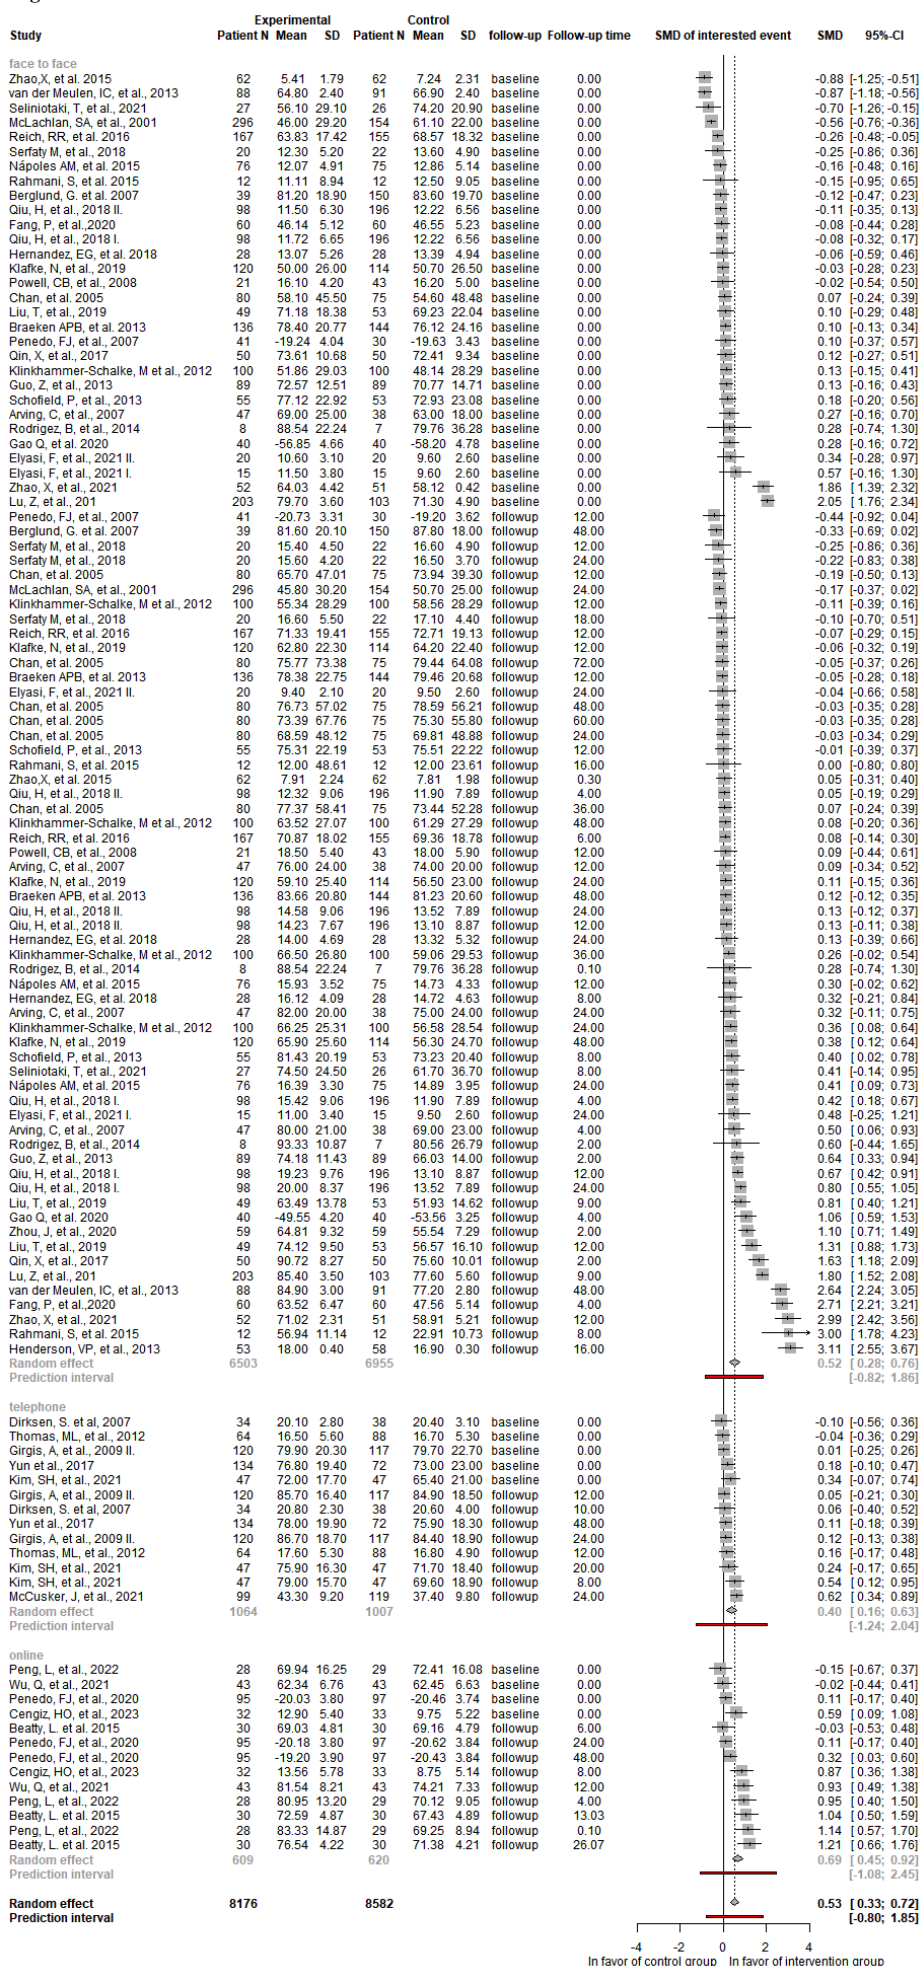

**Figure S9.3.T24**

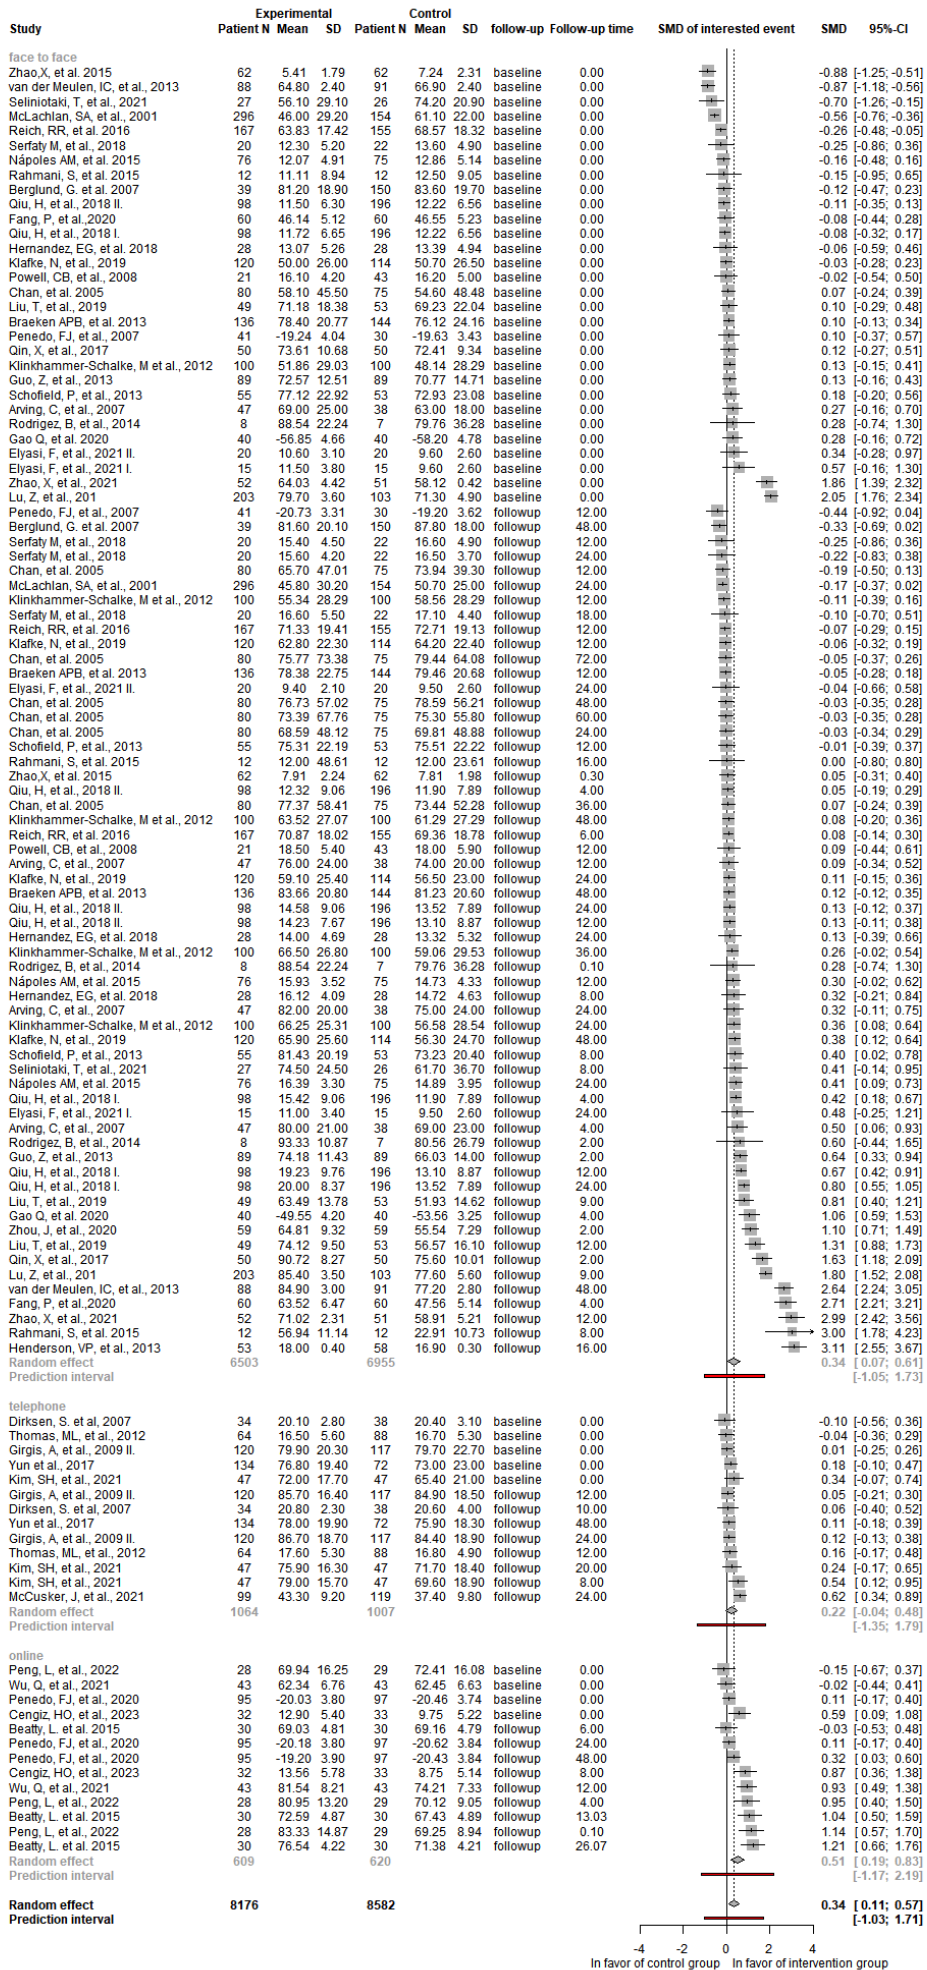

**Figure S9.4.T48**

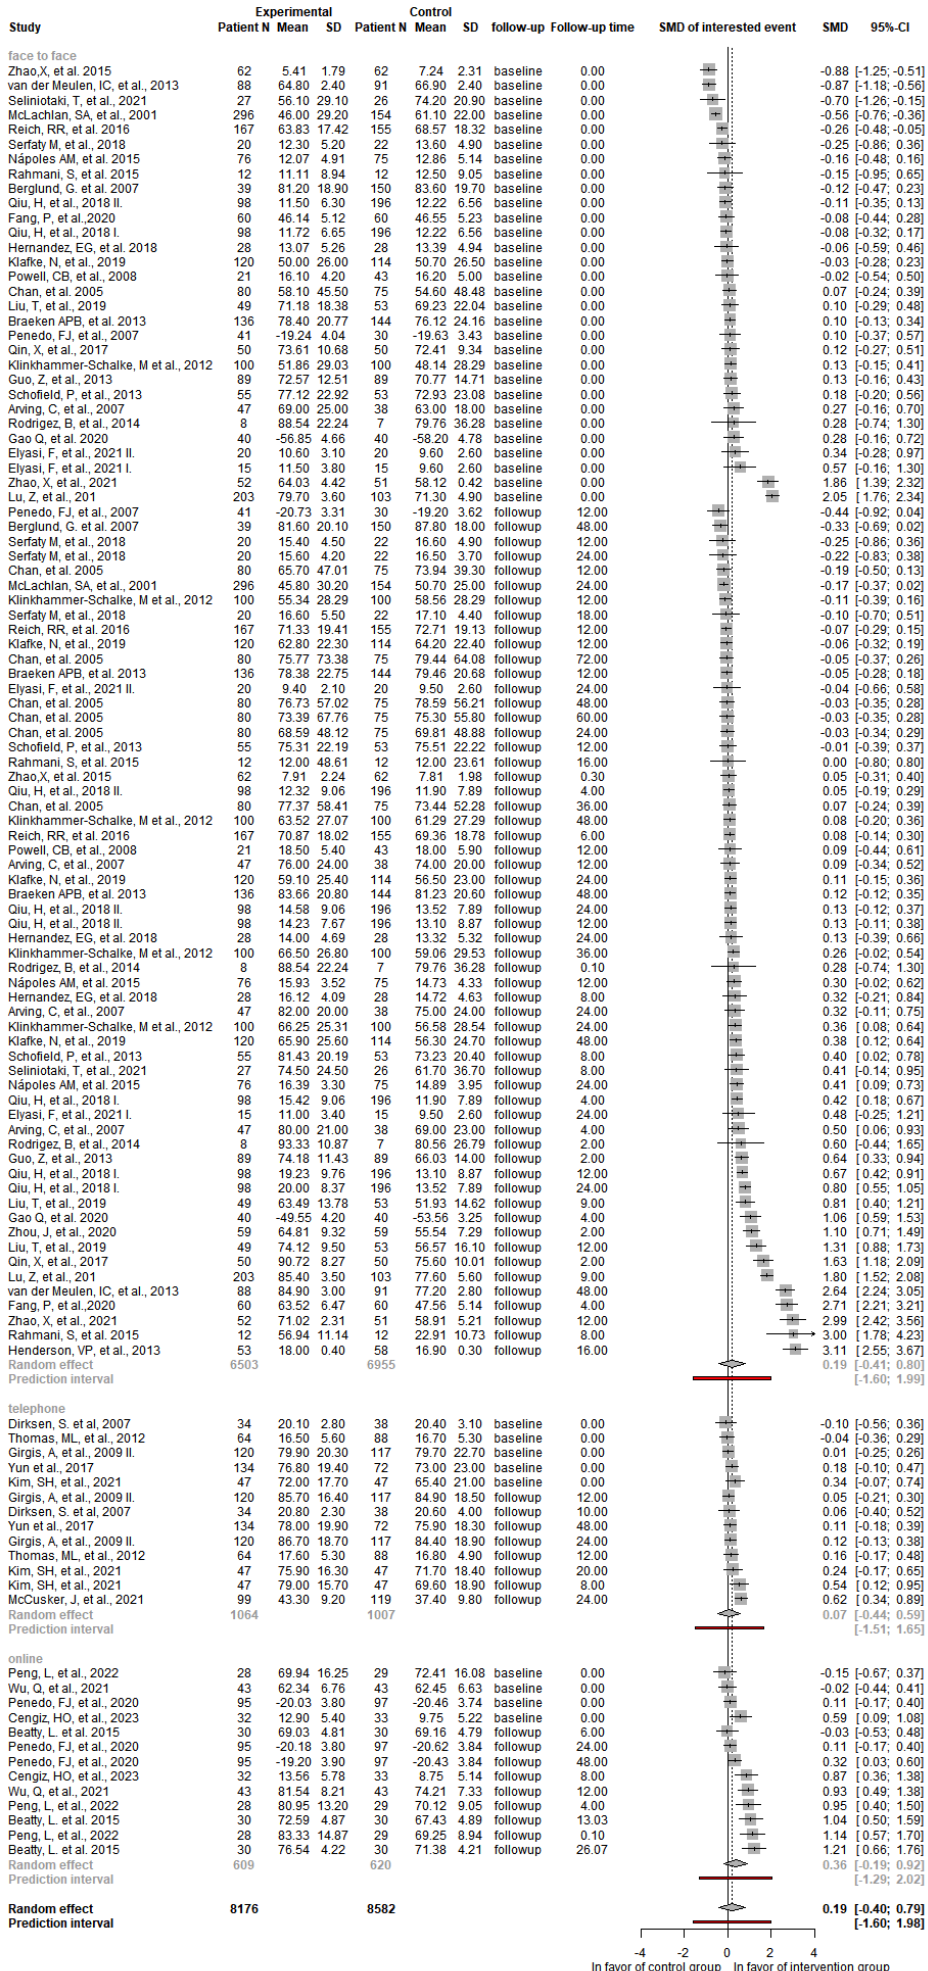

## S10.Subgroup analysis of Emotional QoL: Type

Figure S10.1.T0

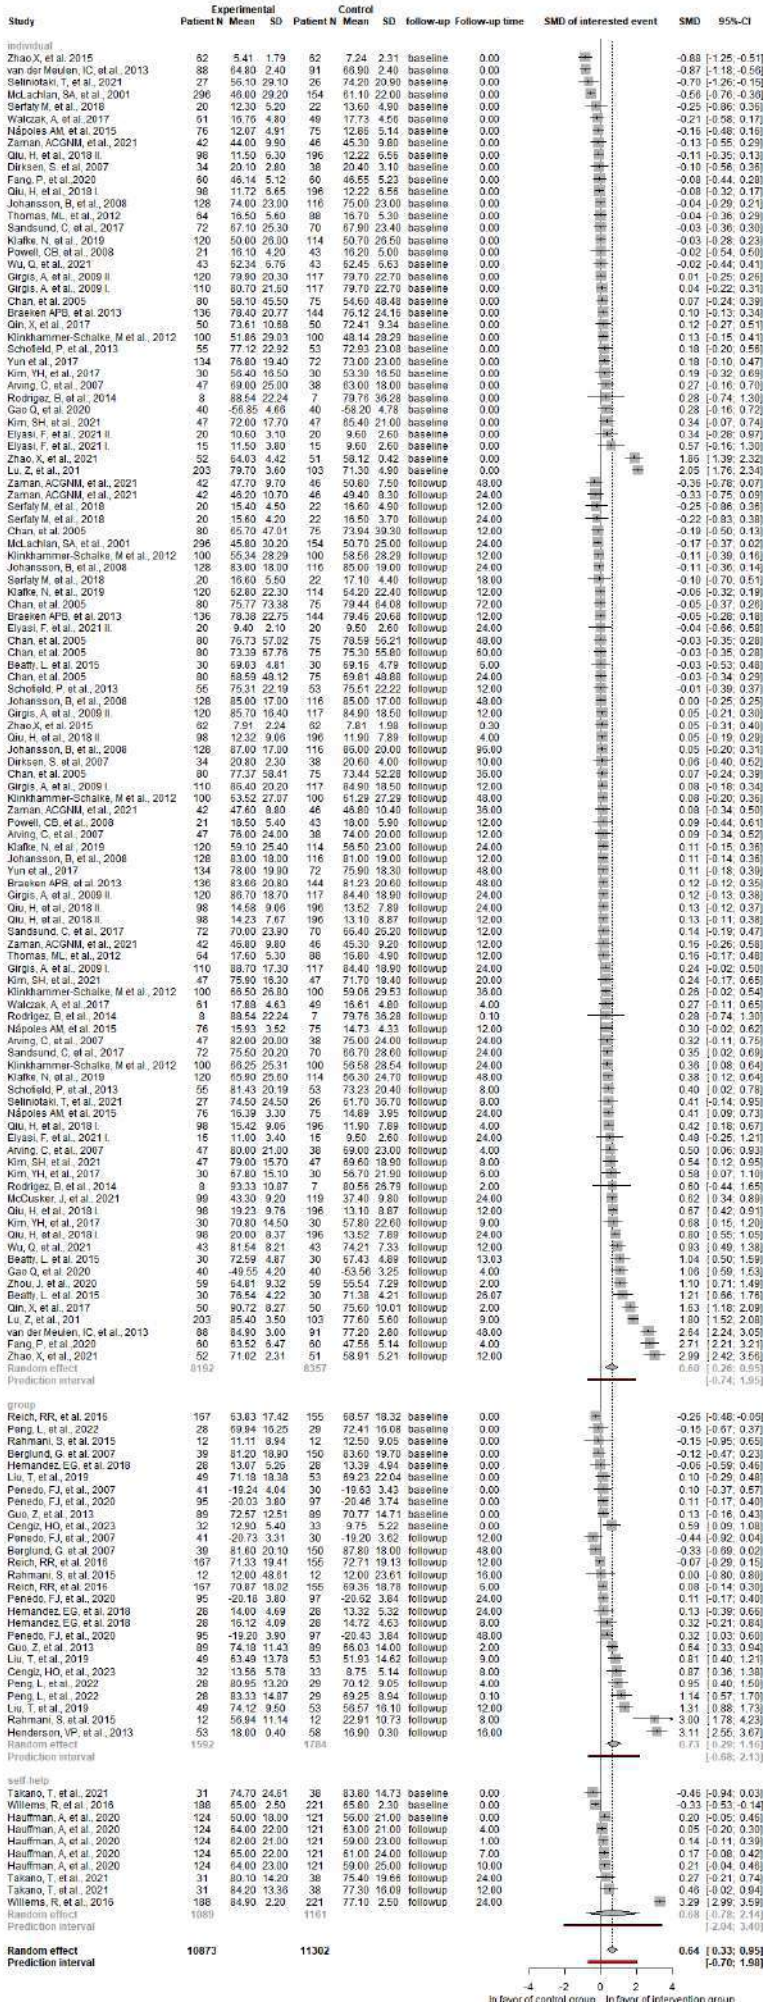

Figure S10.2.T12

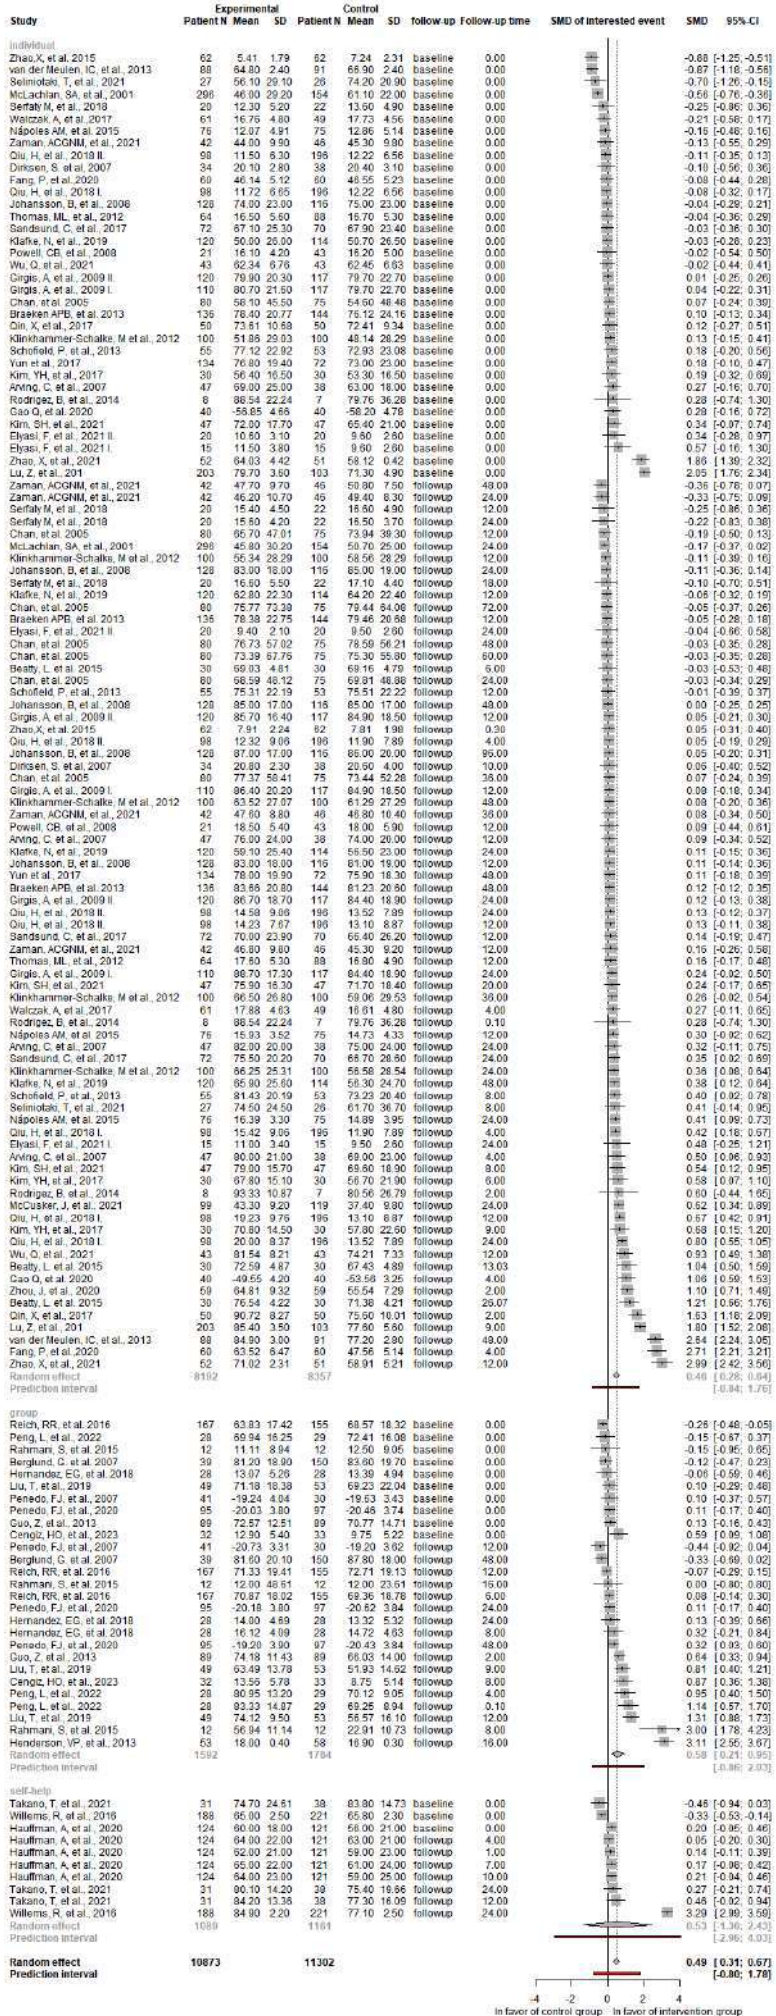



Figure S10.3.T24

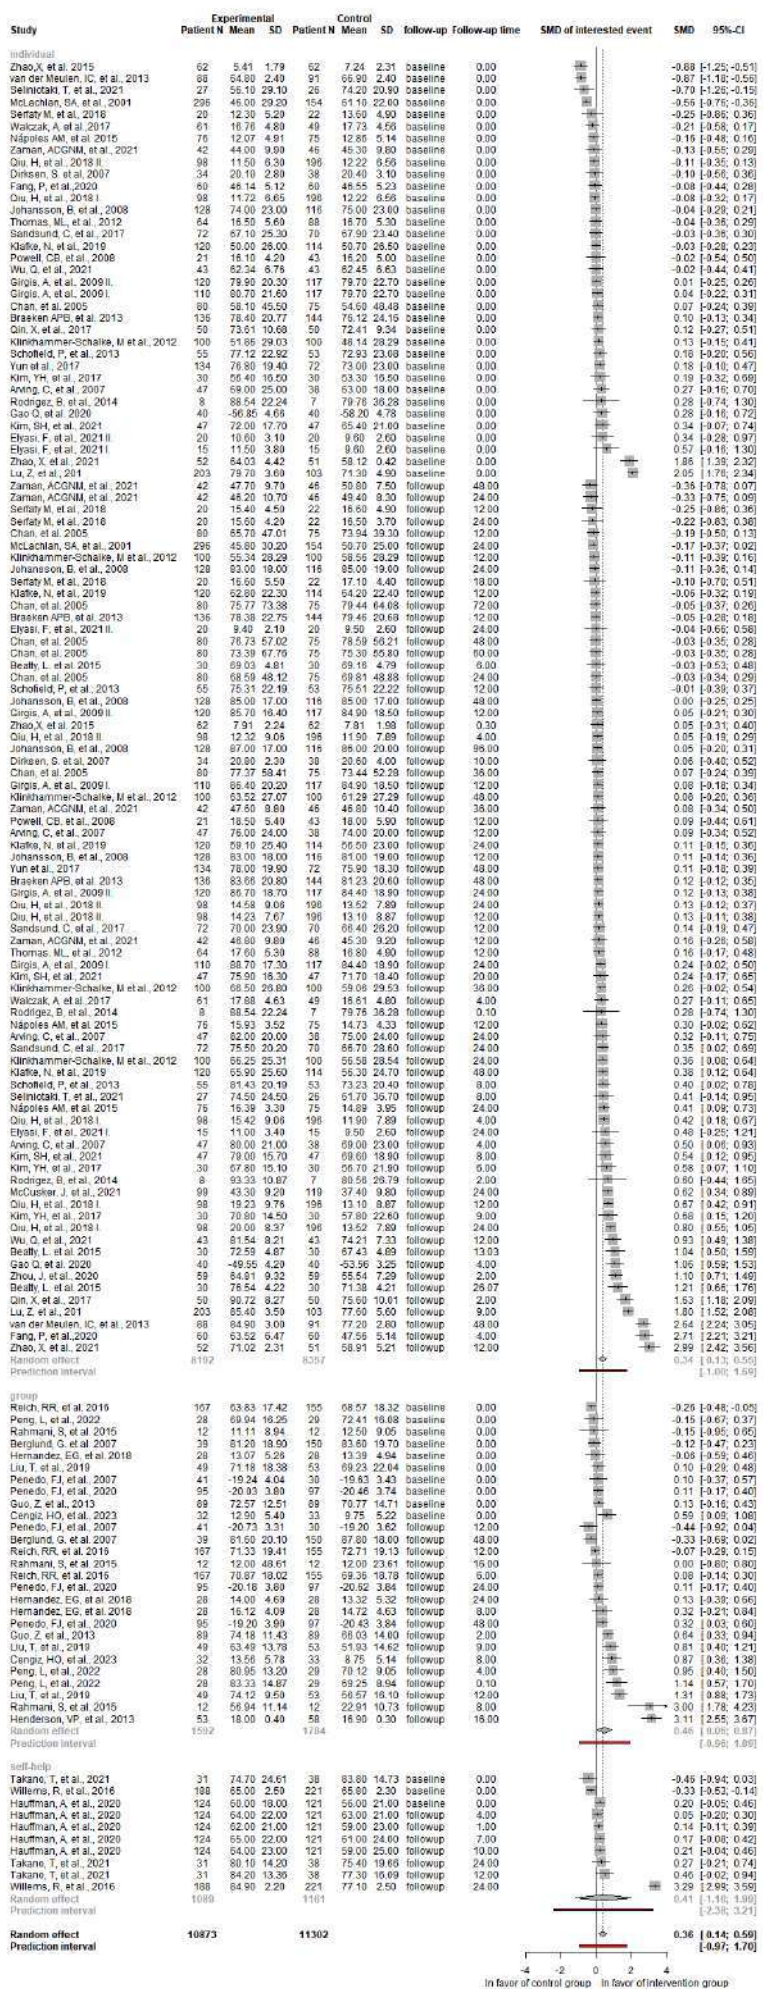



## S11.Subgroup analysis of Emotional QoL: Cancer stage

Figure S11.1.T0

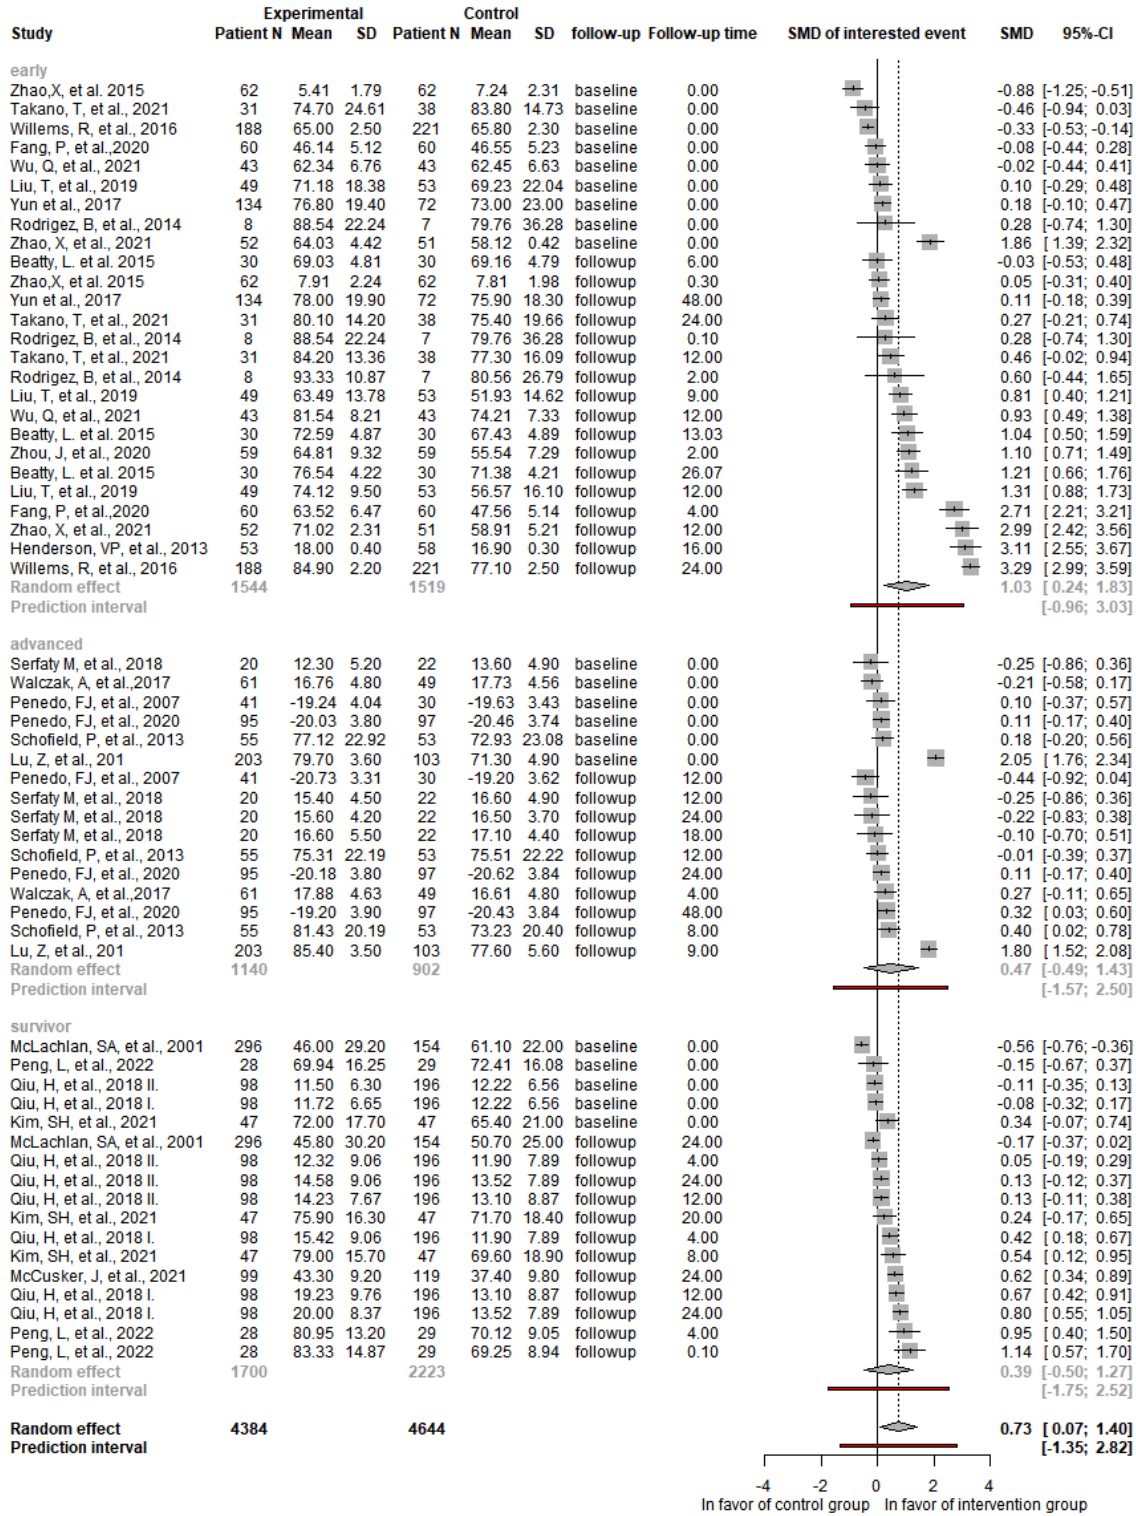

Figure S11.1. Forest plot represents the difference between the intervention vs. control group in the Emotional QoL domain with the cancer stage subgroups as predicted at week 0 (post-intervention). SMD - Standardized mean difference, CI - confidence interval.

Figure S11.2.T12

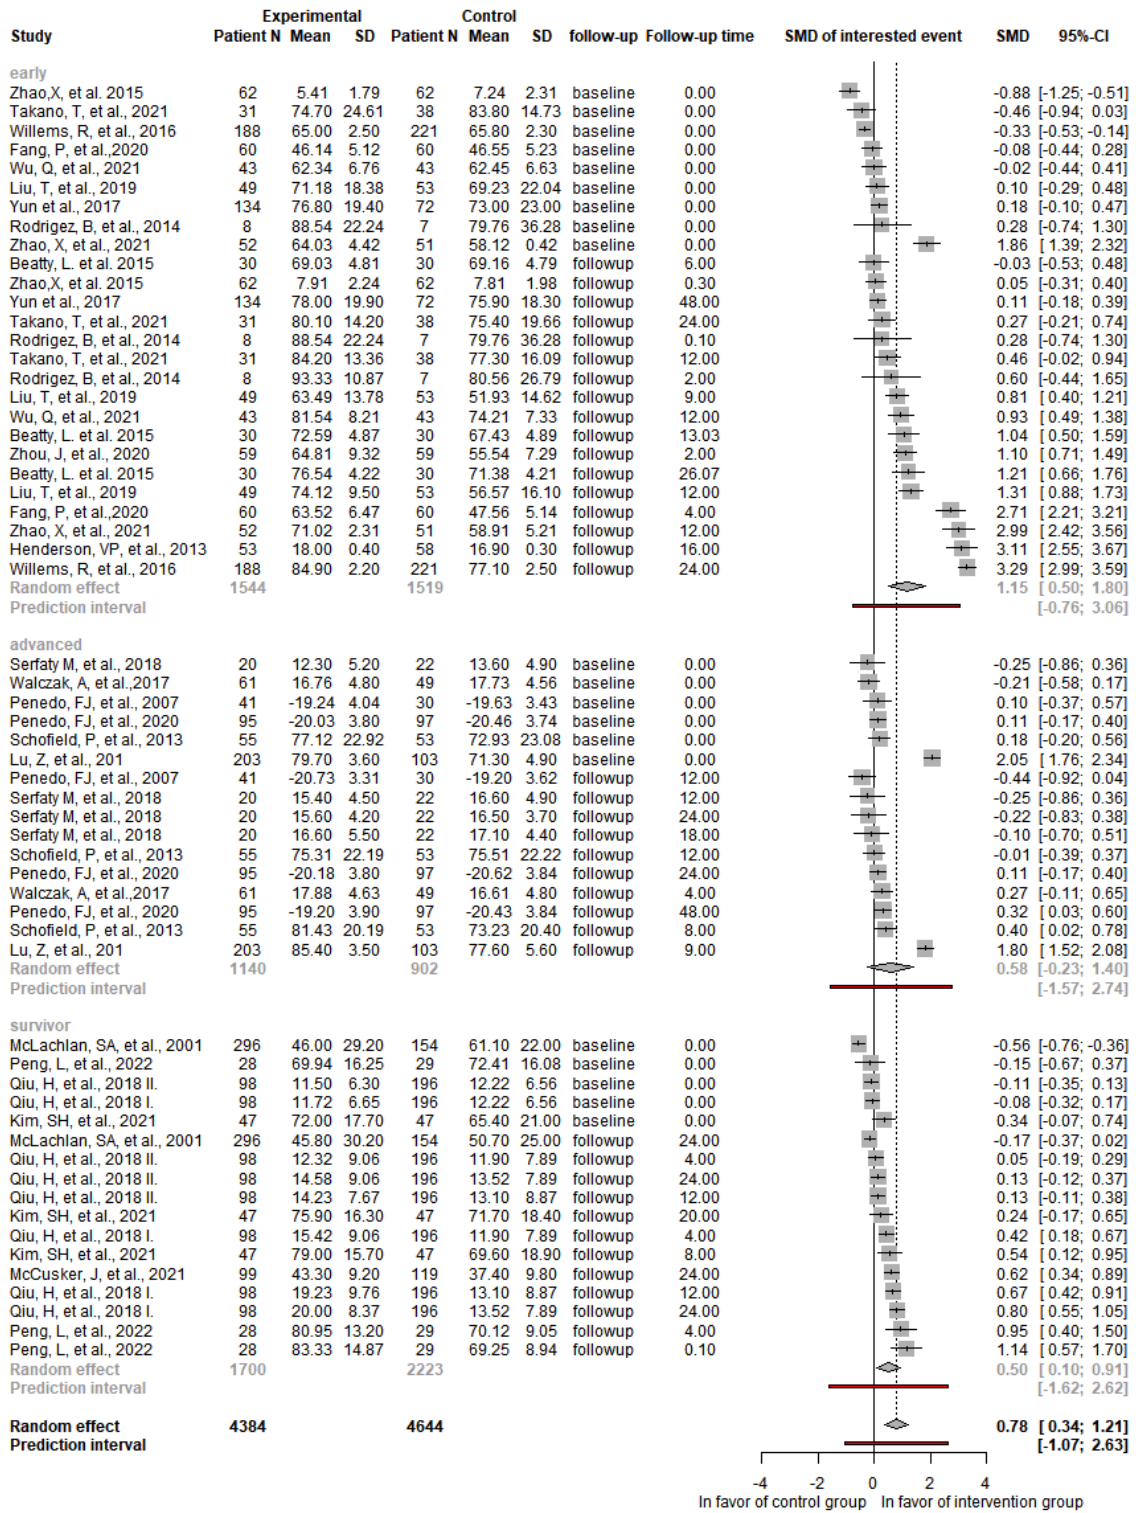

Figure S11.2. Forest plot represents the difference between the intervention vs. control group in the Emotional QoL domain with the cancer stage subgroups as predicted at week 12 (post-intervention). SMD - Standardized mean difference, CI - confidence interval.

**Figure S11.3.T24**

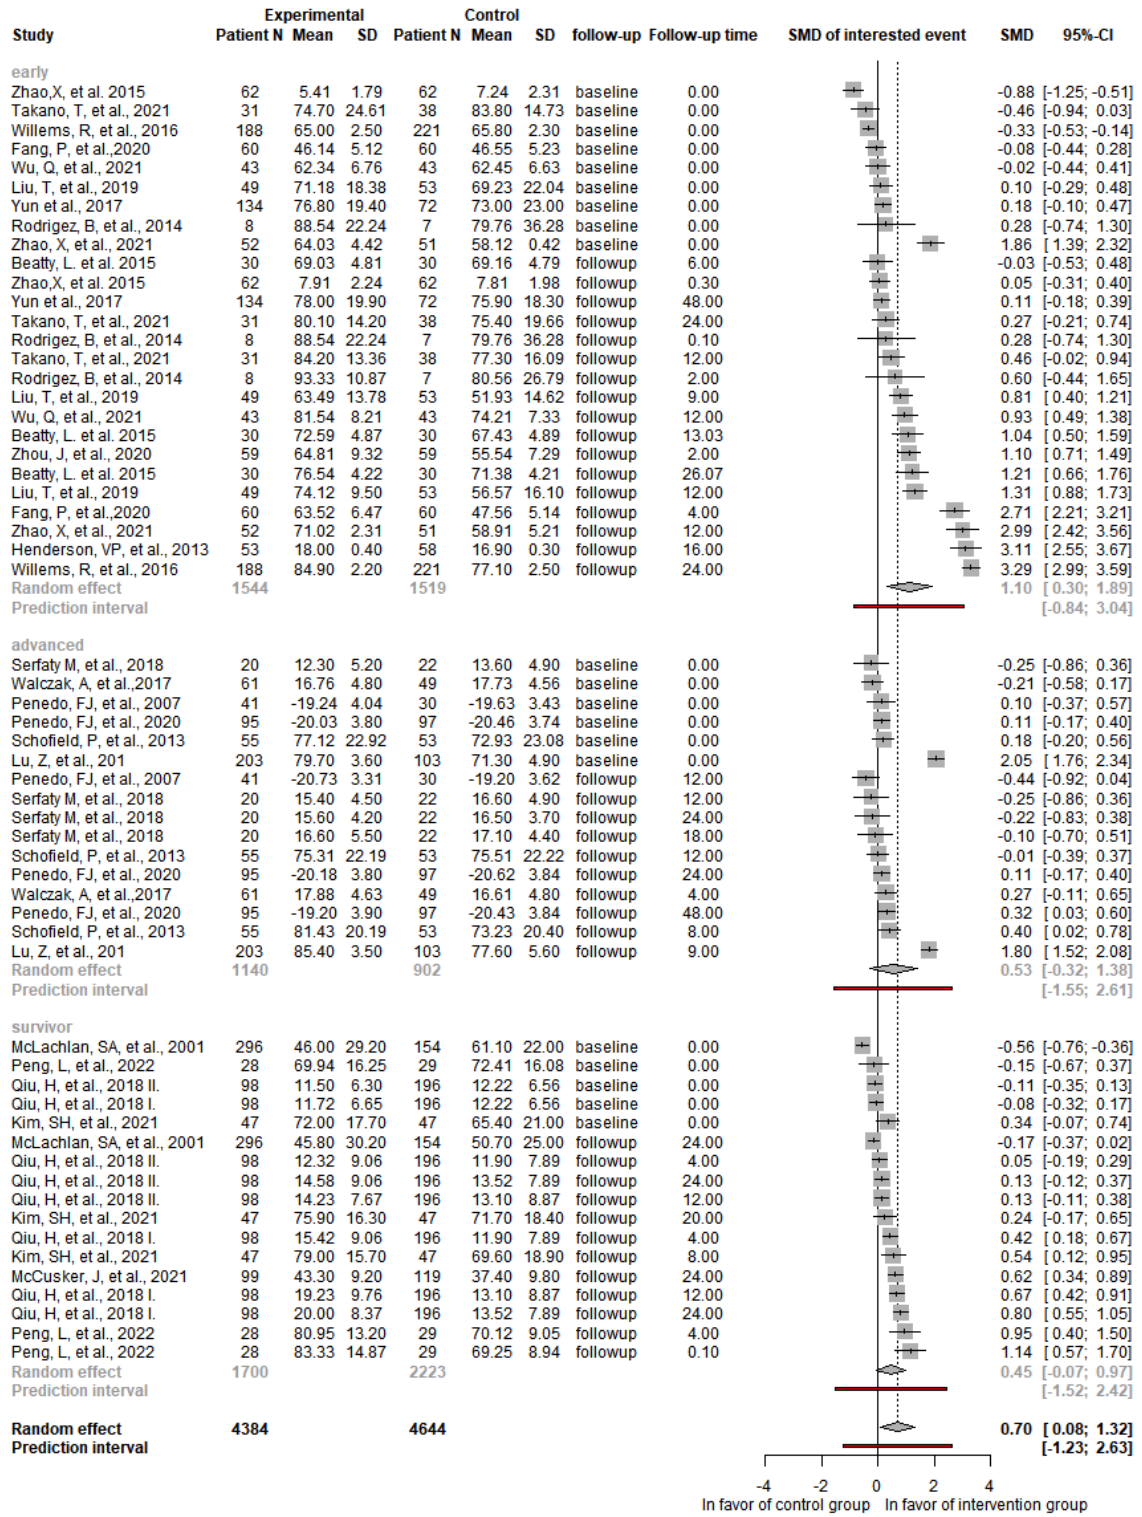

Figure S11.3. Forest plot represents the difference between the intervention vs. control group in the Emotional QoL domain with the cancer stage subgroups as predicted at week 24 (post-intervention). SMD - Standardized mean difference, CI - confidence interval.

Figure S11.4.T48

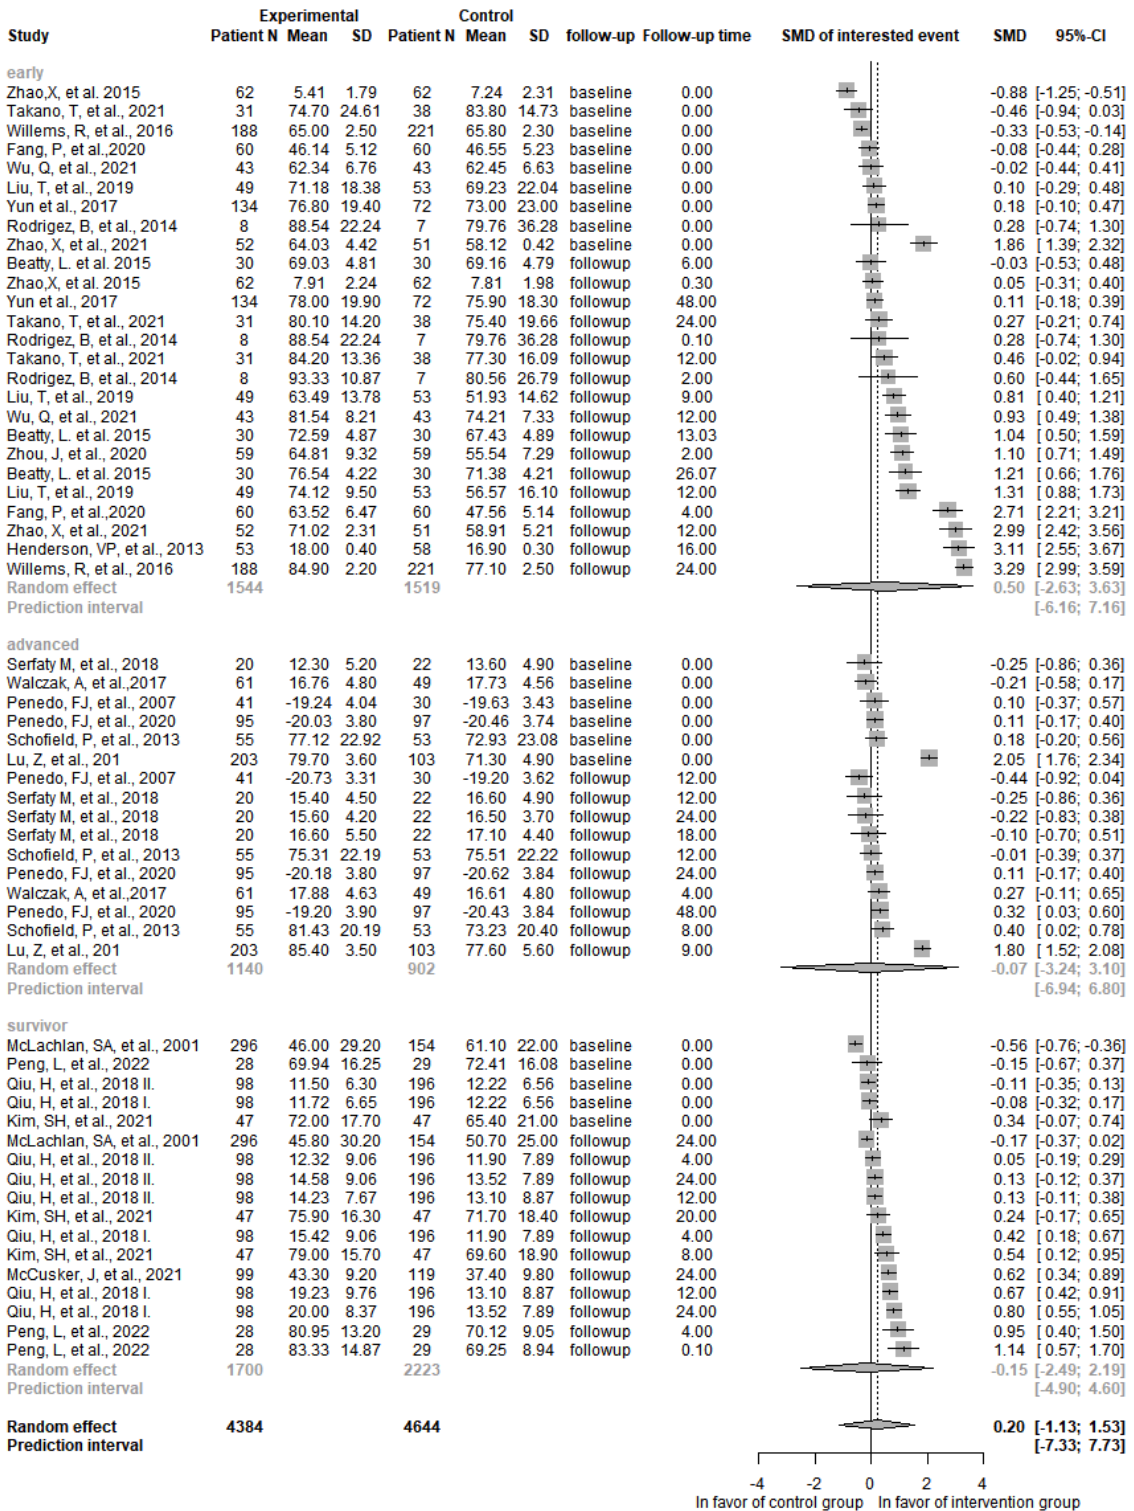

Figure S11.4. Forest plot represents the difference between the intervention vs. control group in the Emotional QoL domain with the cancer stage subgroups as predicted at week 48 (post-intervention). SMD - Standardized mean difference, CI - confidence interval.

## S12.Subgroup analysis of Emotional QoL: Cancer type



Figure S12.1.T0

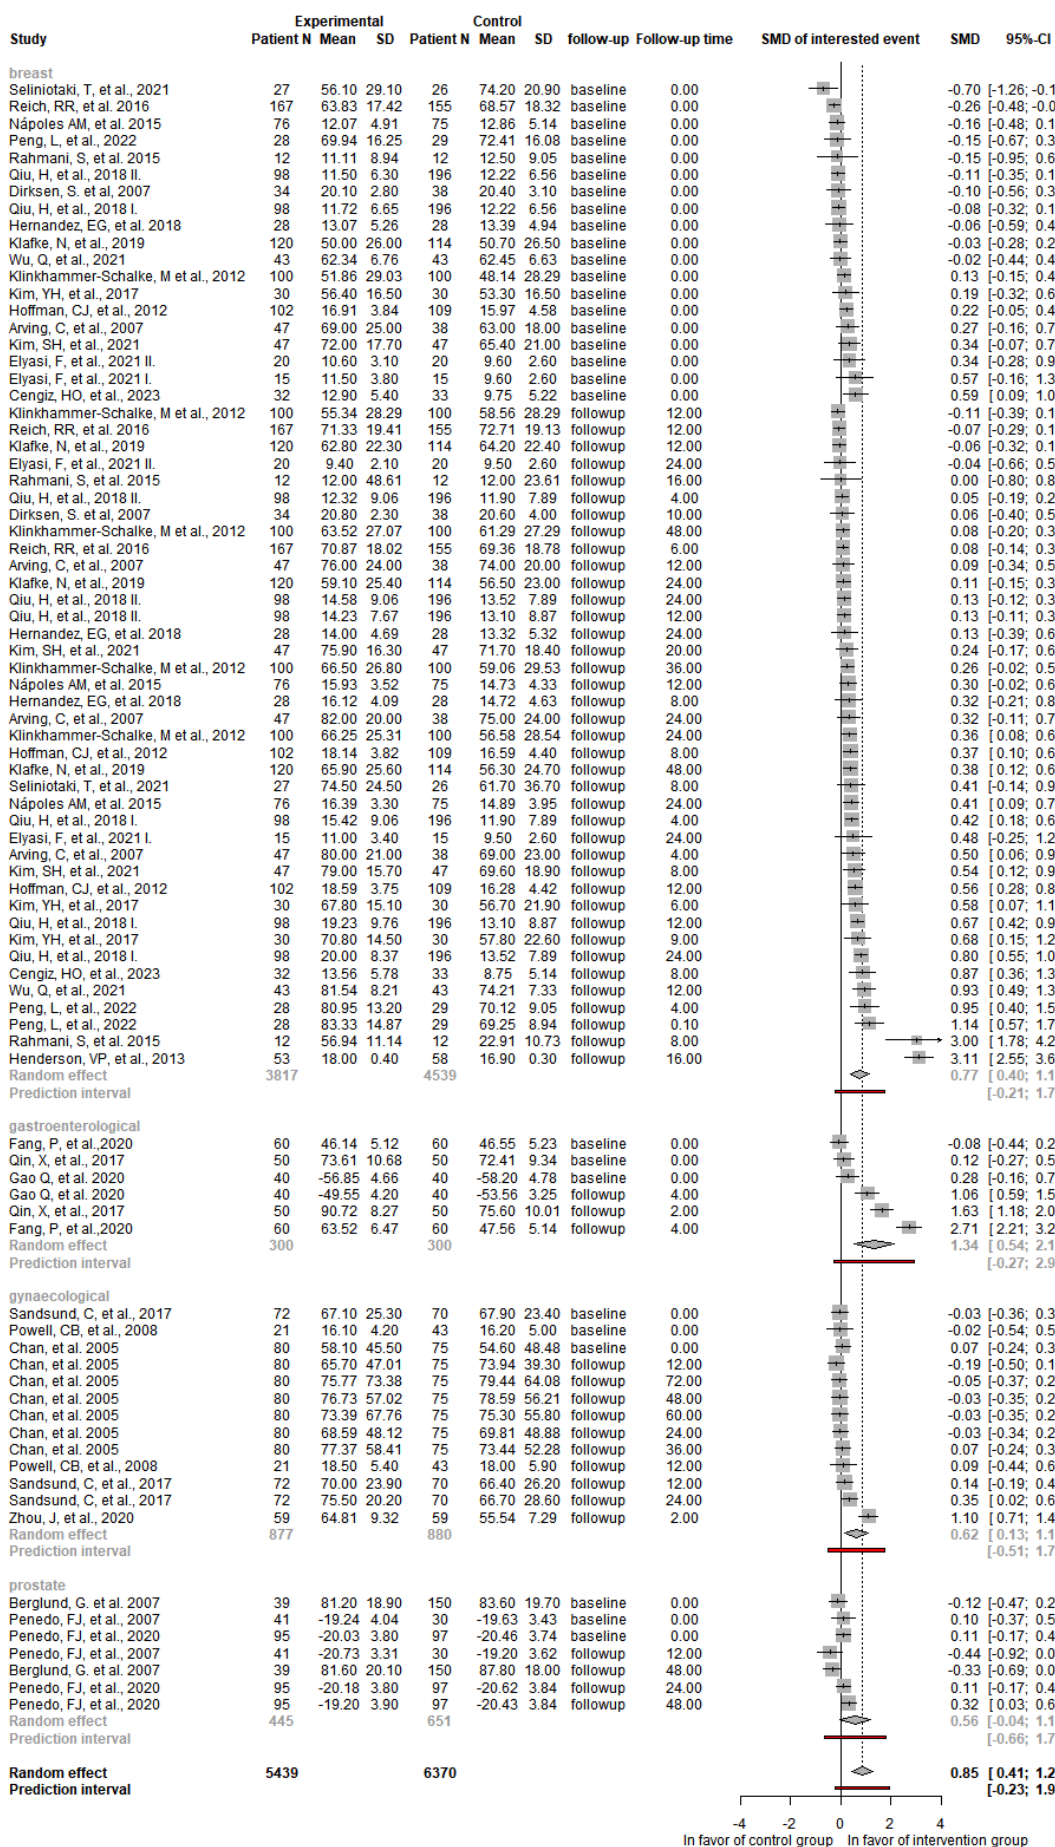

Figure S12.1. Subgroup analysis of the Emotional QoL. Forest plot represents the difference between the intervention vs. control group in the Emotional QoL domain with the cancer type subgroups as predicted at week 0 (post-intervention). SMD - Standardized mean difference, CI - confidence interval.

Figure S12.2.T12

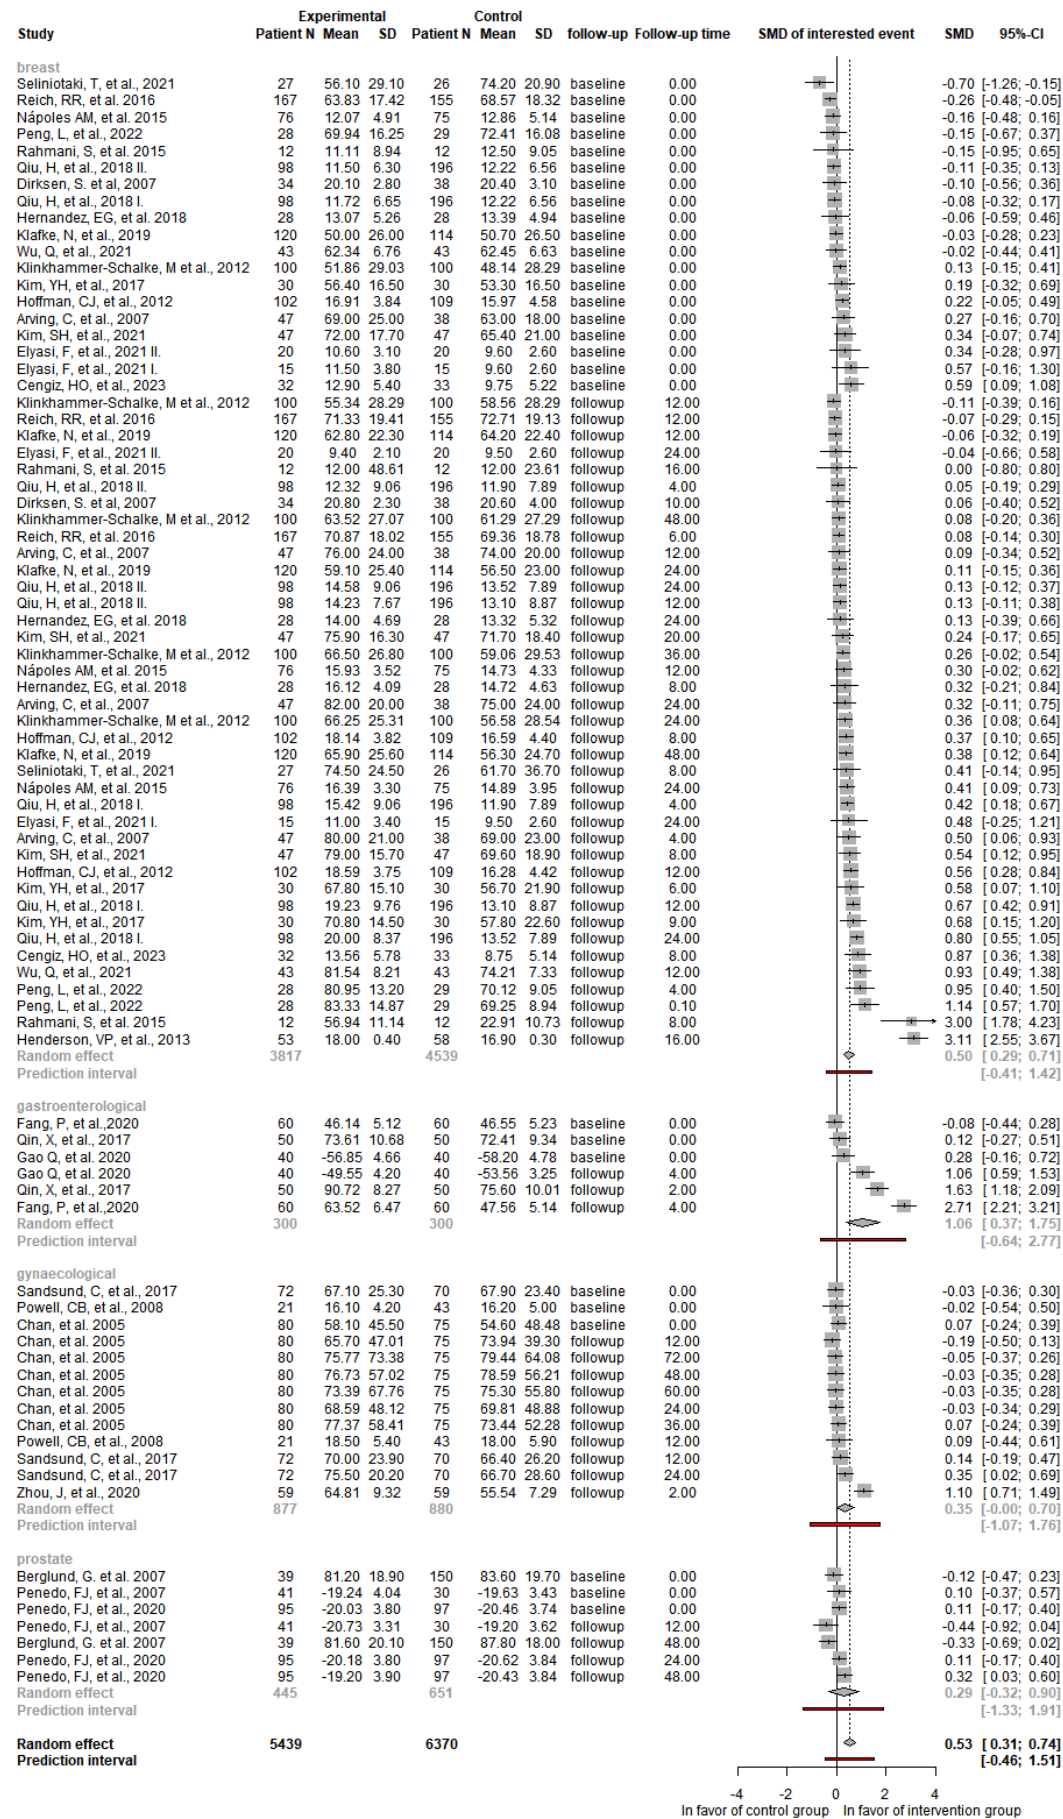

Figure S12.2. Subgroup analysis of the Emotional QoL domain with the cancer type subgroups as predicted at week 12 (post-intervention). SMD - Standardized mean difference, CI - confidence interval.

**Figure S12.3.T24**

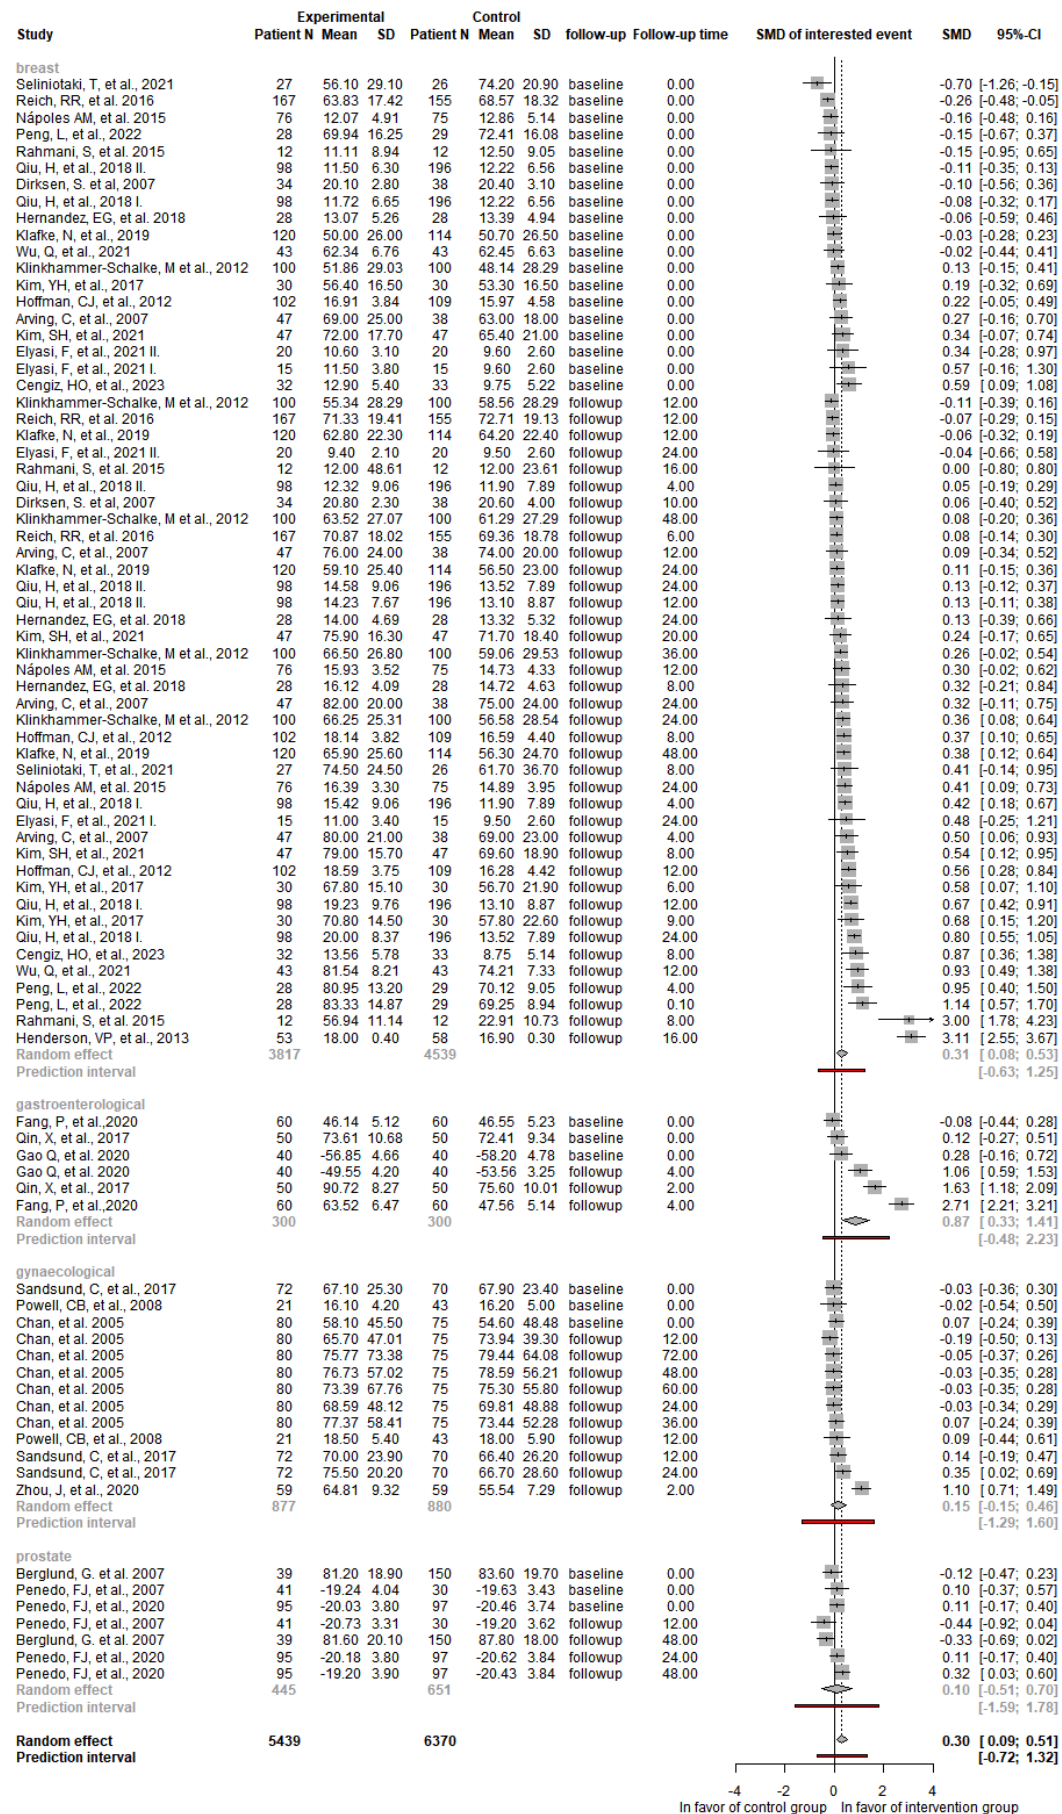

Figure S12.4.T48

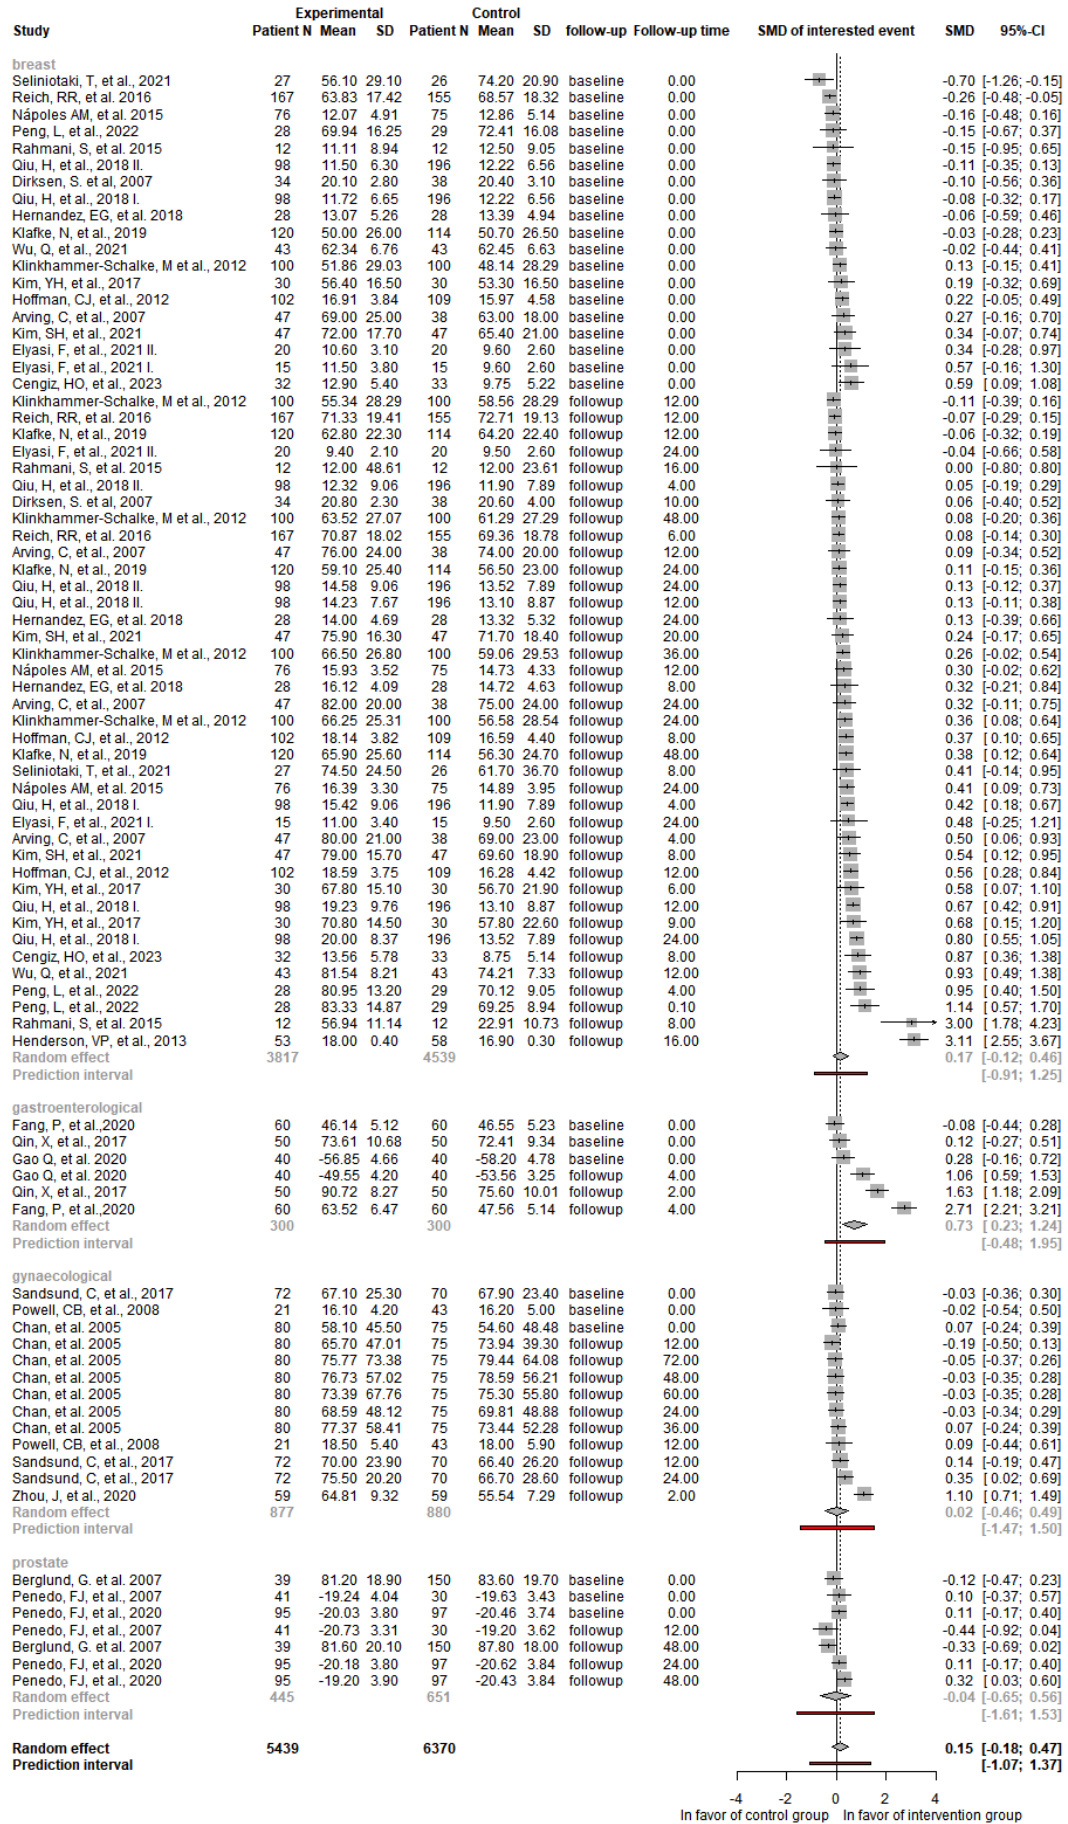

Figure S12.4. Subgroup analysis of the Emotional QoL. Forest plot represents the difference between the intervention vs. control group in the Emotional QoL domain with the cancer type subgroups as predicted at week 48 (post-intervention). SMD - Standardized mean difference, CI - confidence interval.

## S13.Subgroup analysis of Social QoL: Provider

**Figure S13.1.T0**

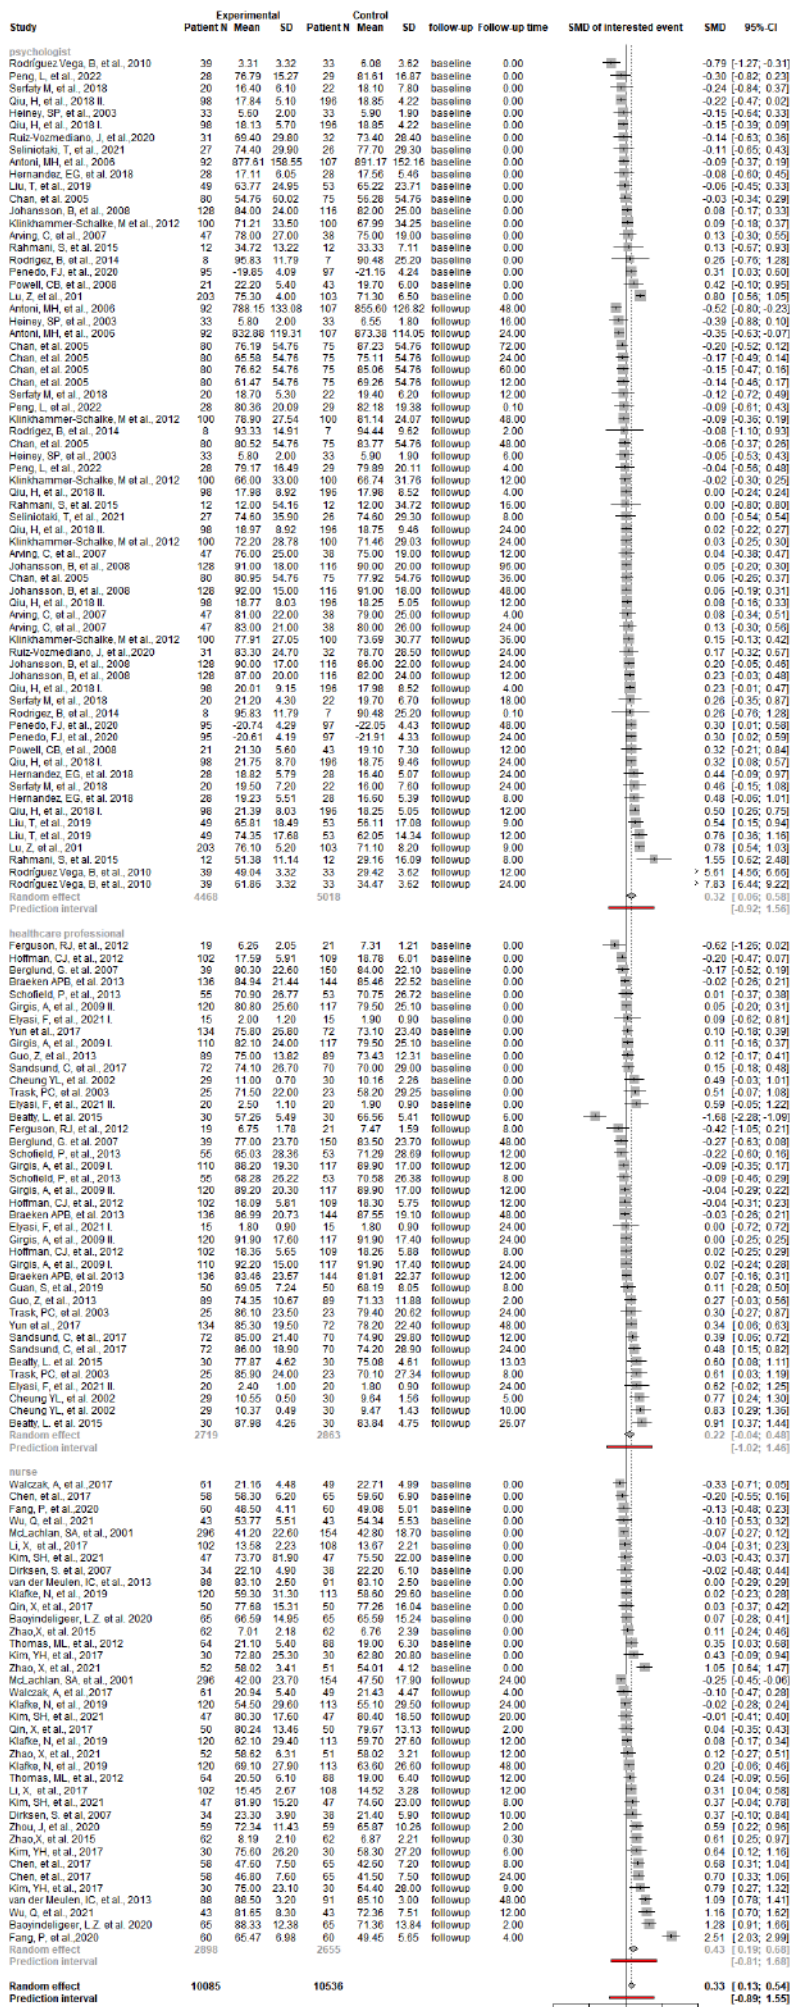

Figure S13.2.T12

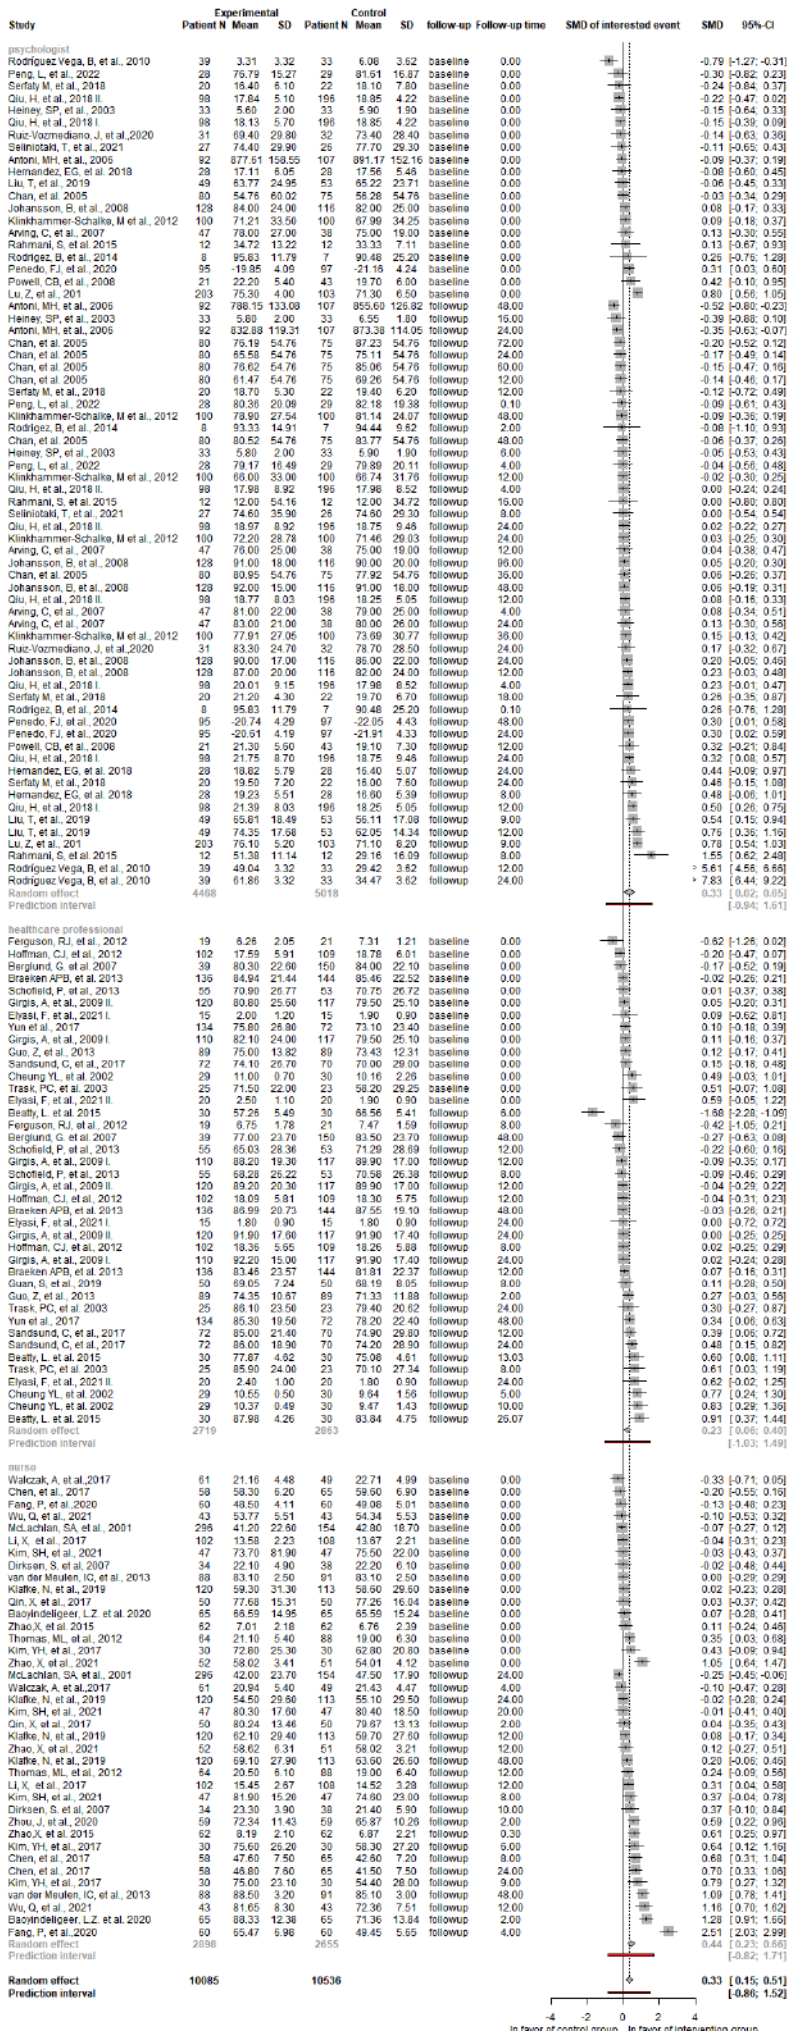

Figure S13.3.T24

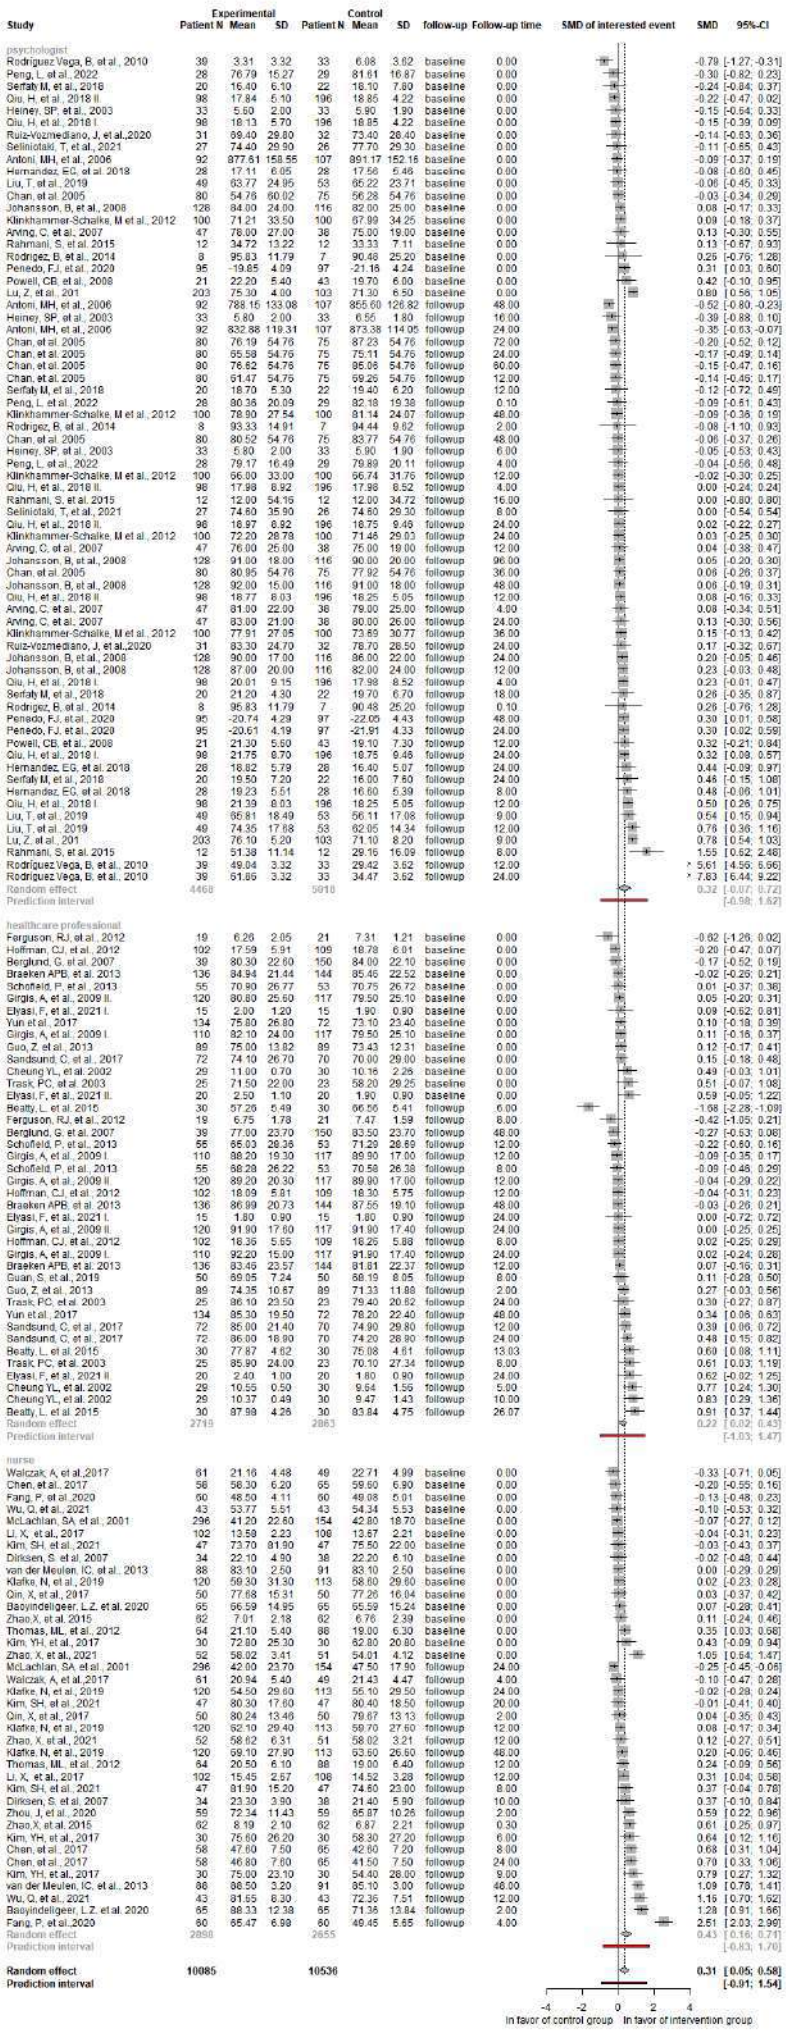



Figure S13.4.T48

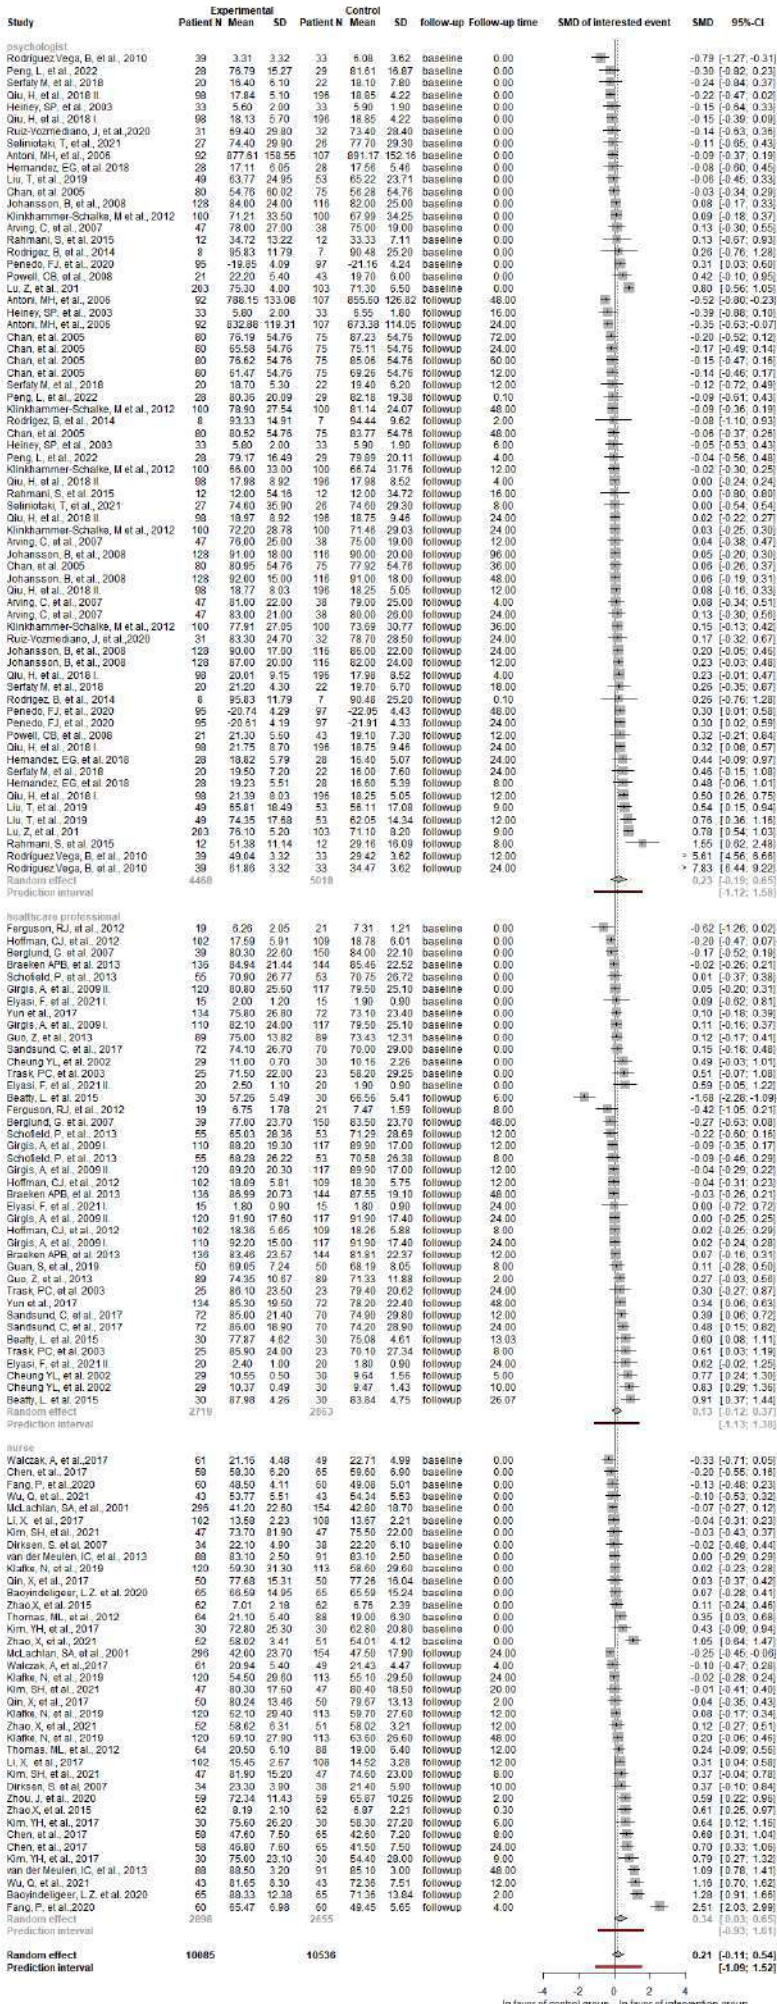

## S14.Subgroup analysis of Social QoL: Environment

Figure S14.1.T0

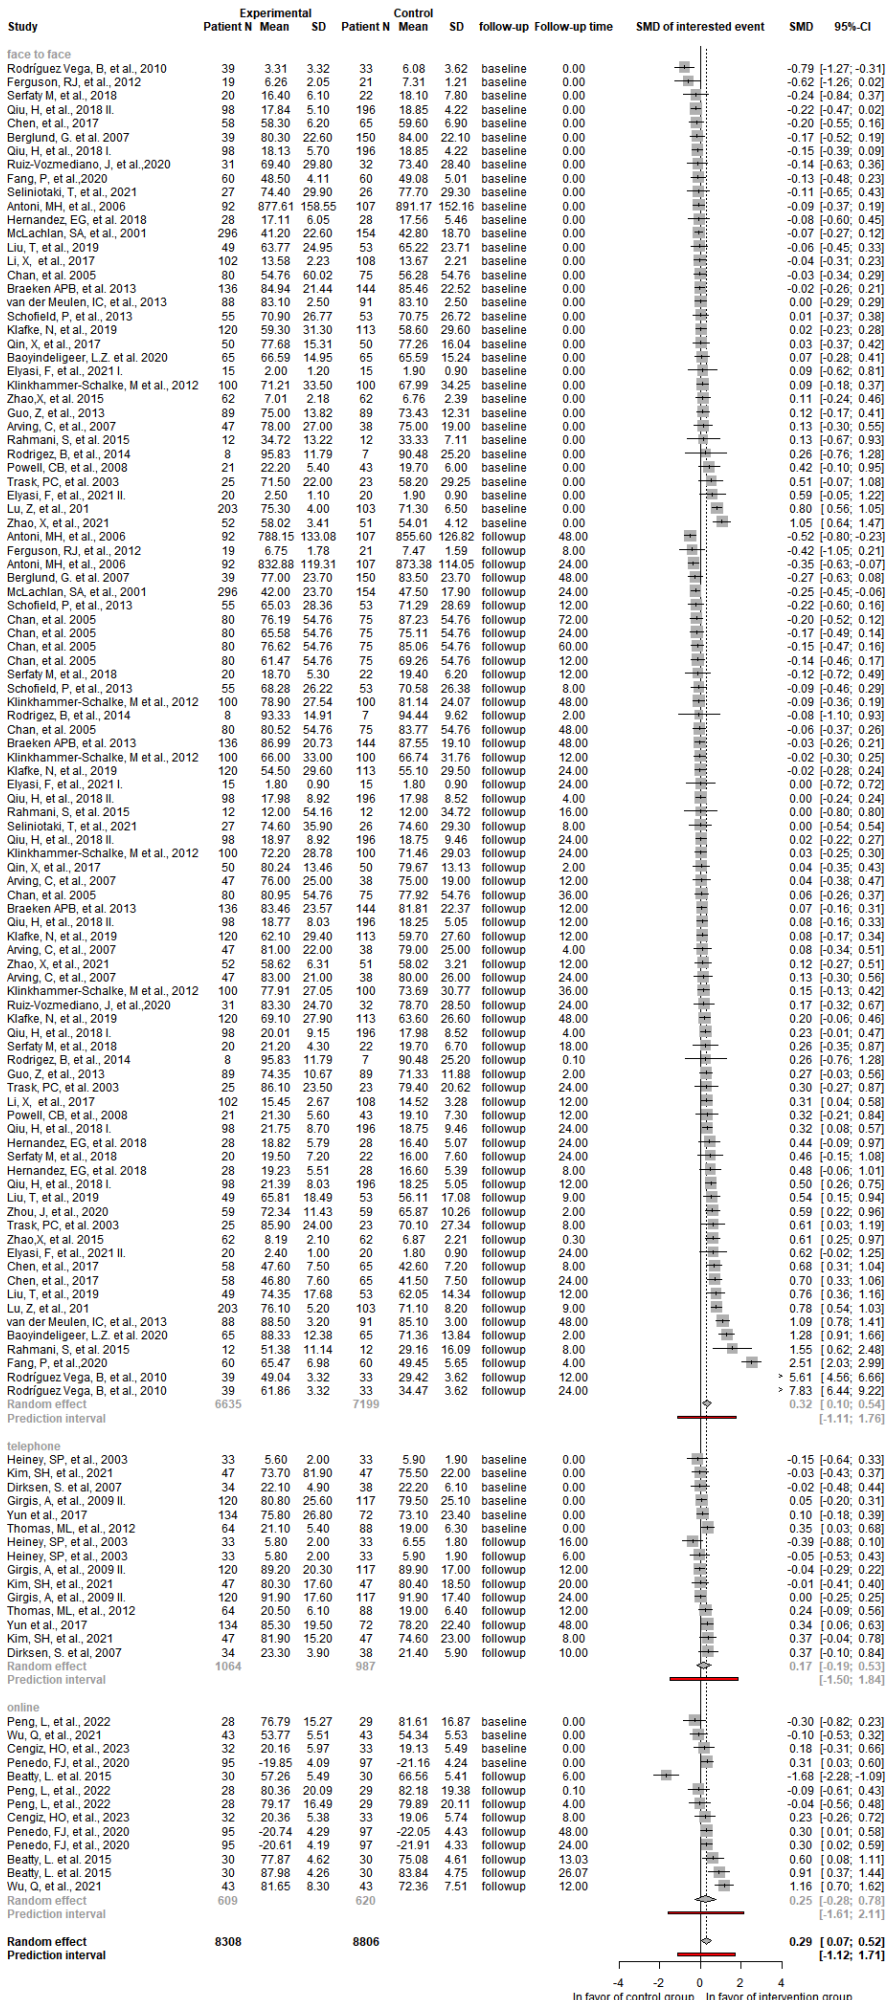

**Figure S14.2.T12**

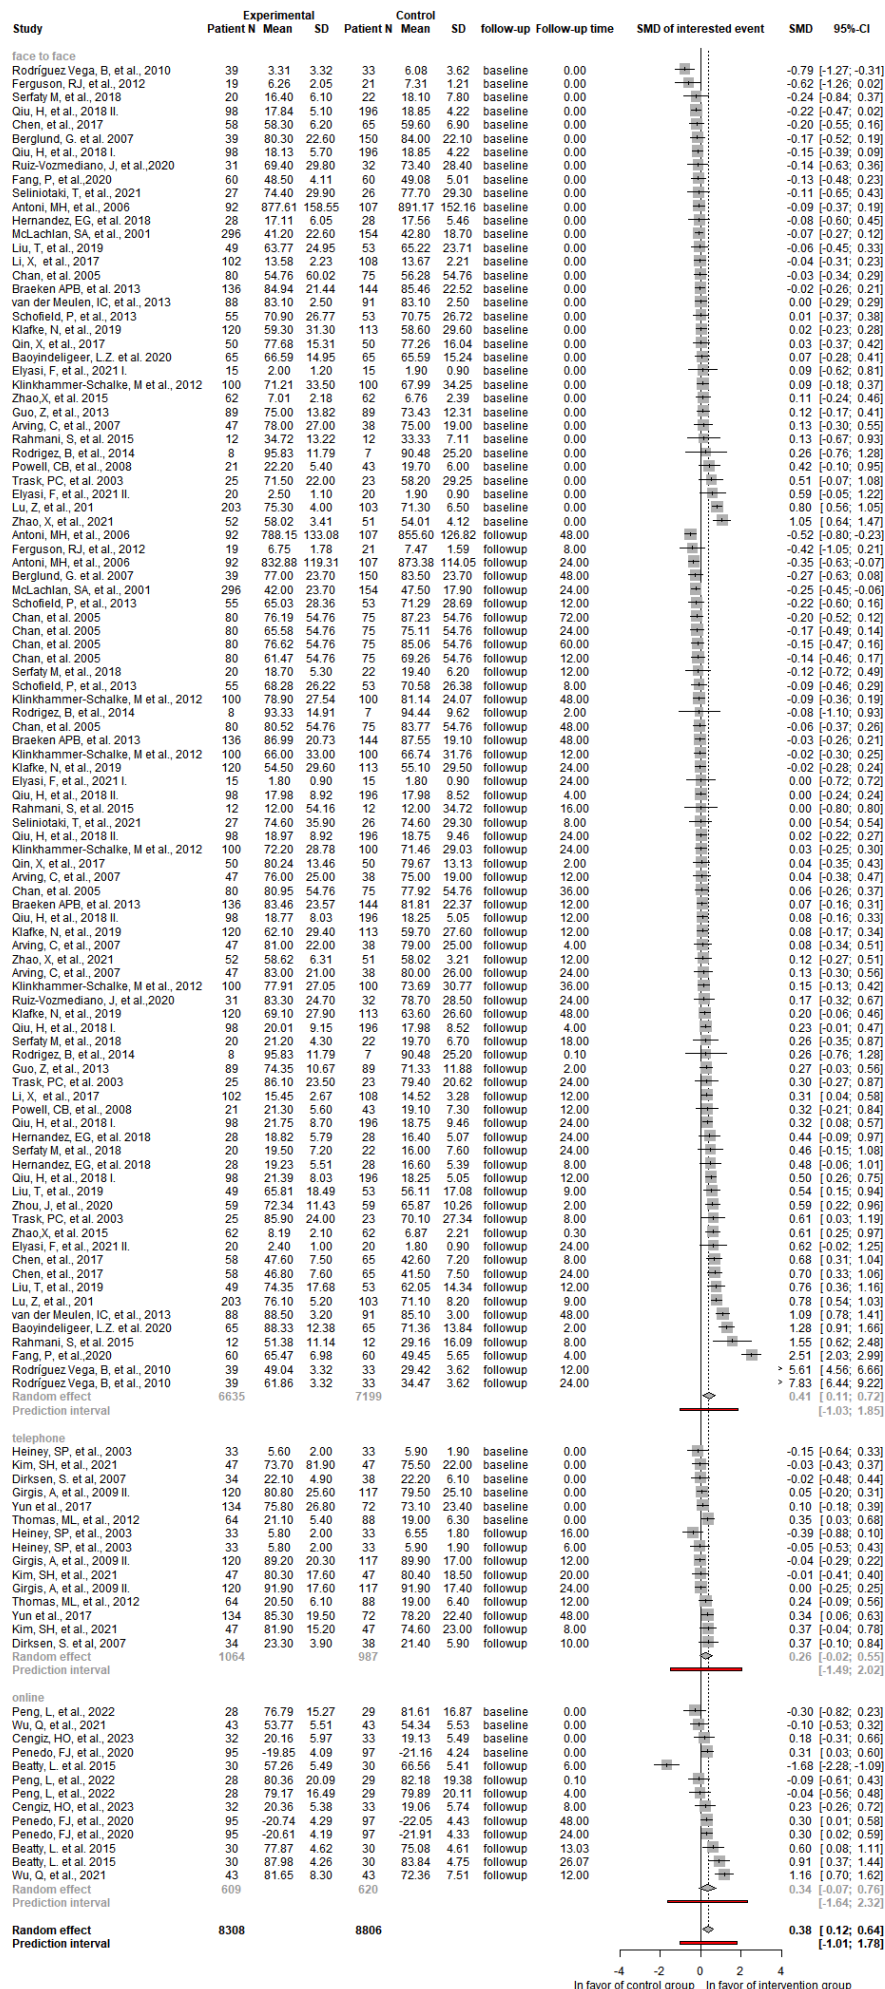

Figure S14.3.T24

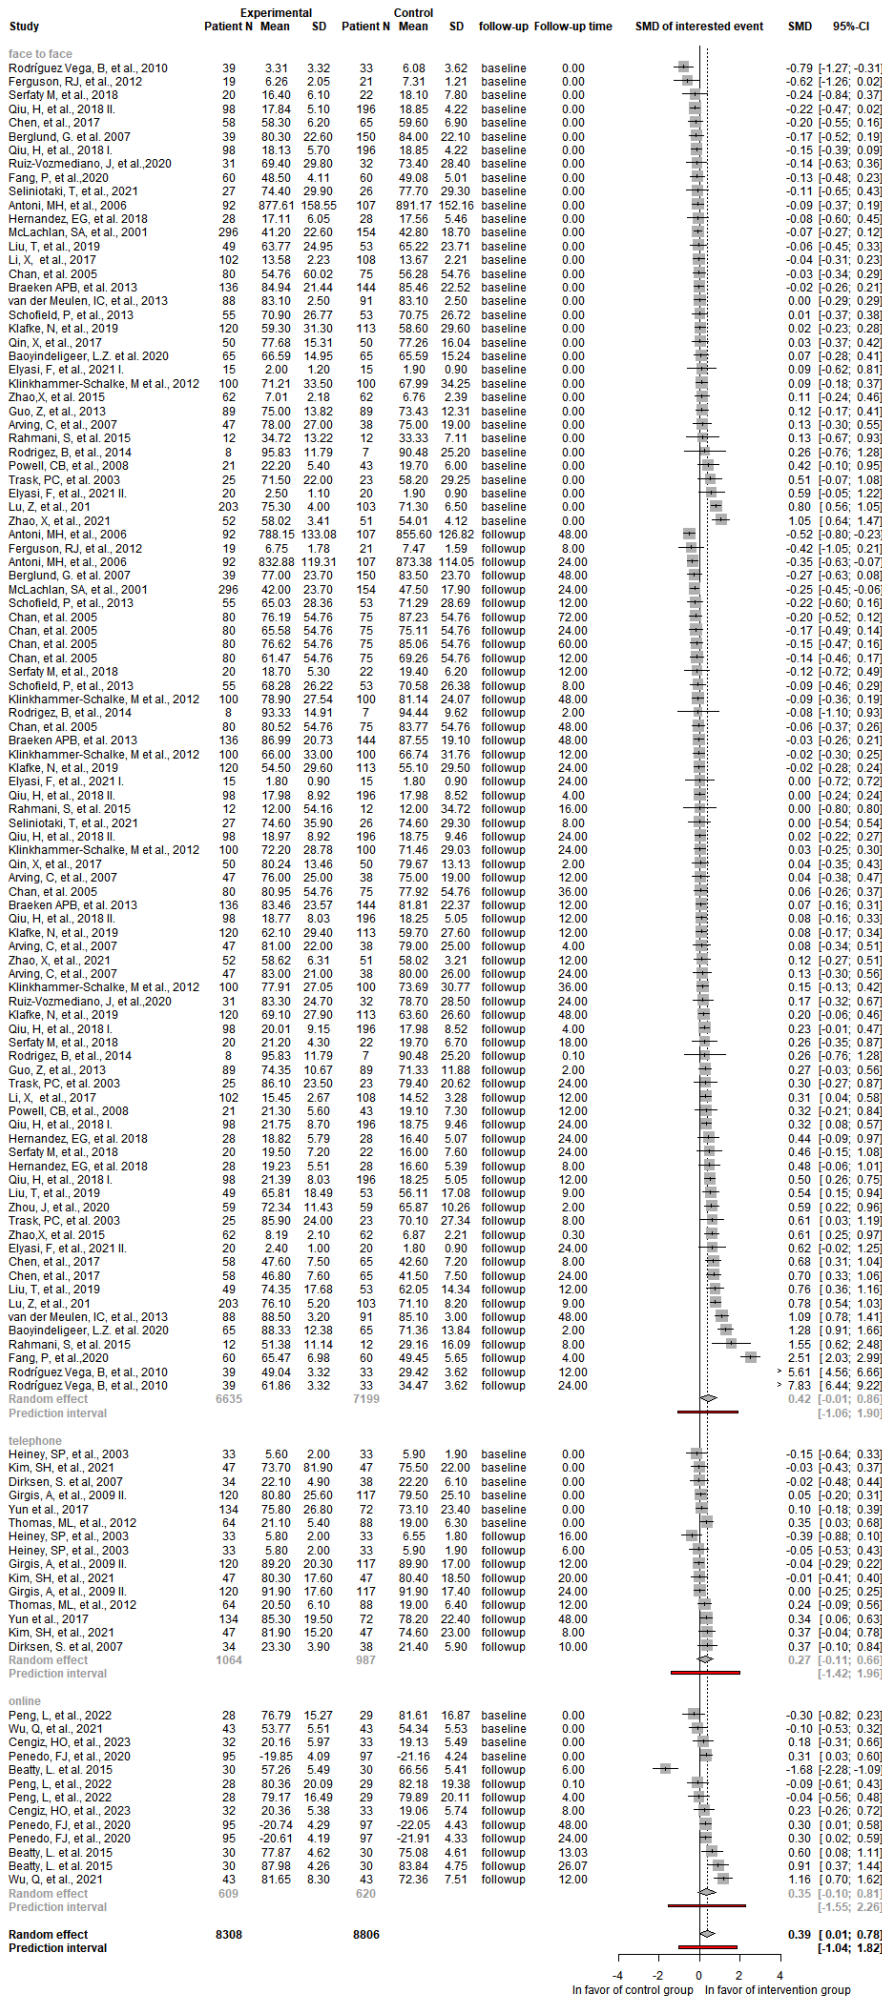

**Figure S14.4.T48**

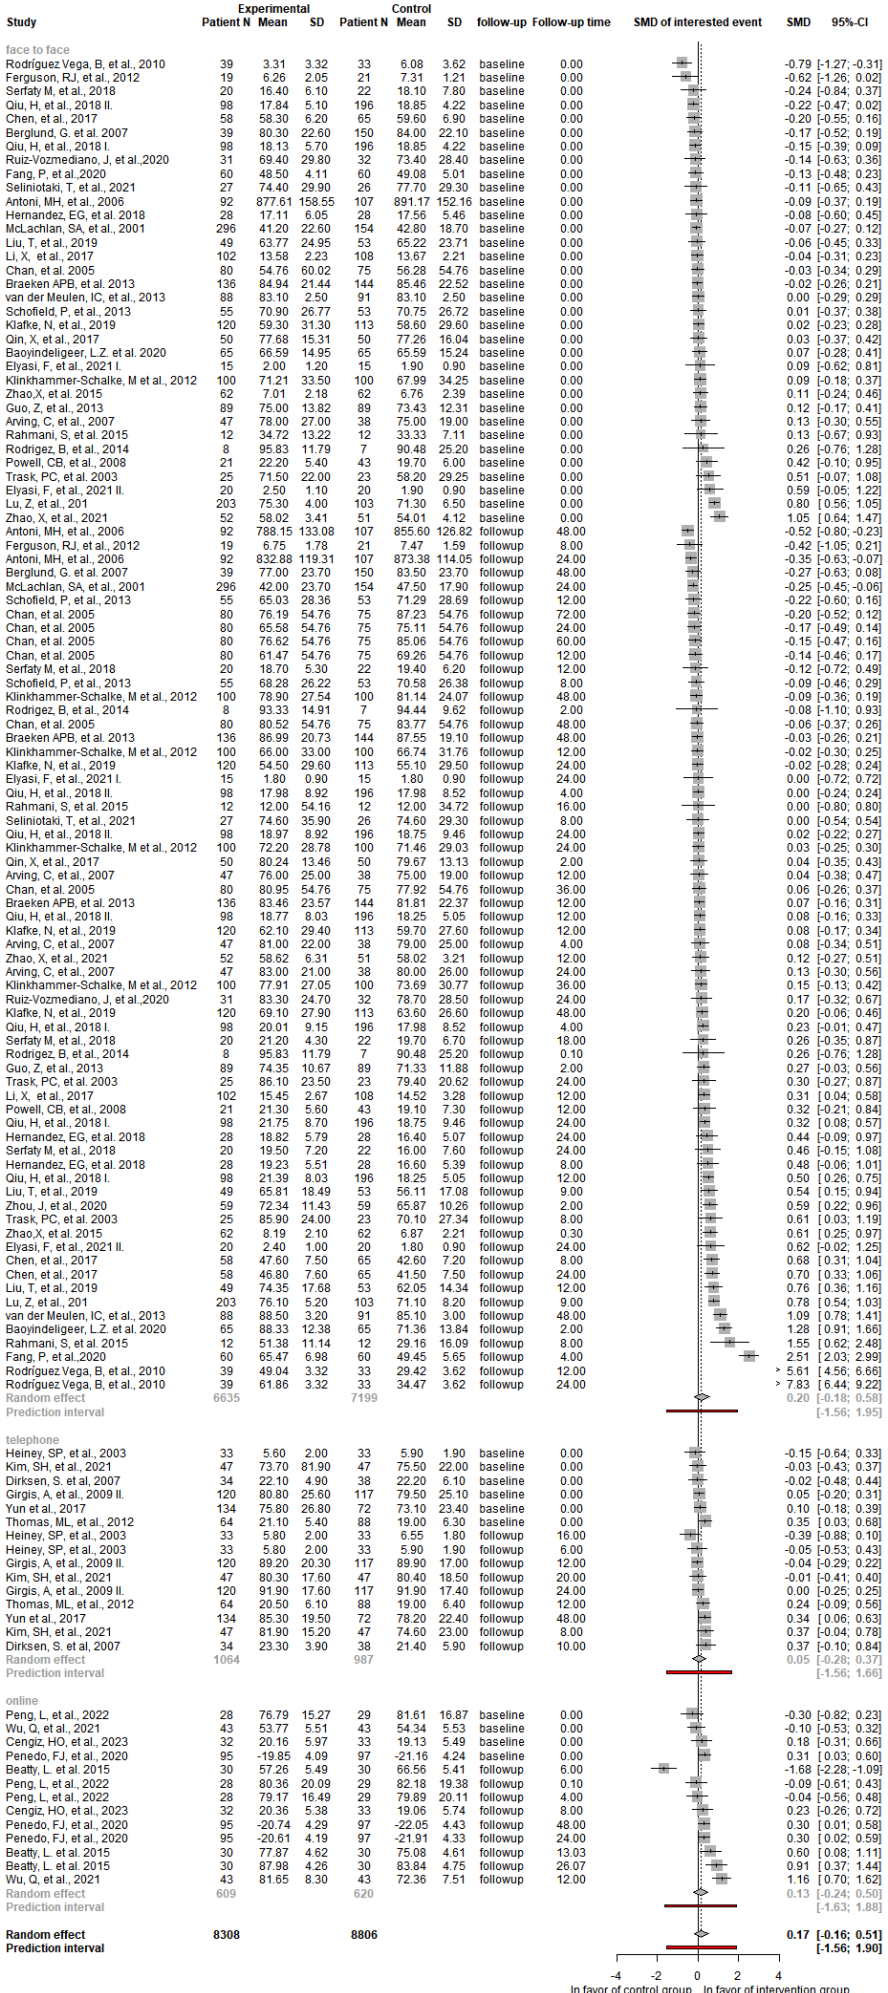

## S15.Subgroup analysis of Social QoL: Type

Figure S15.1.T0

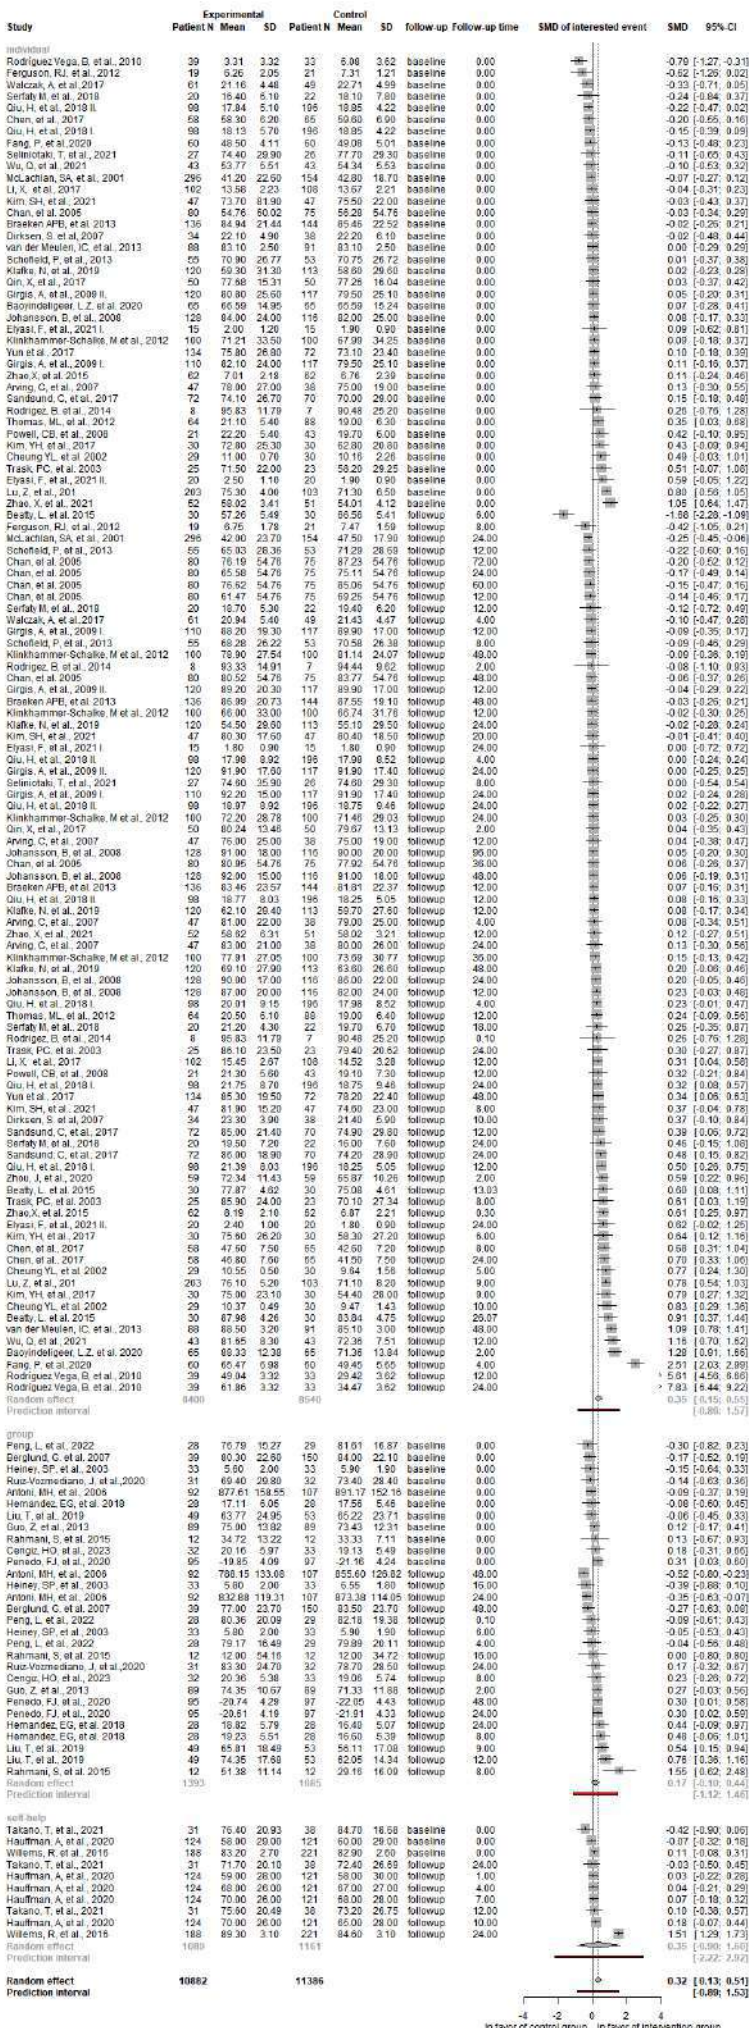



Figure S15.2.T12

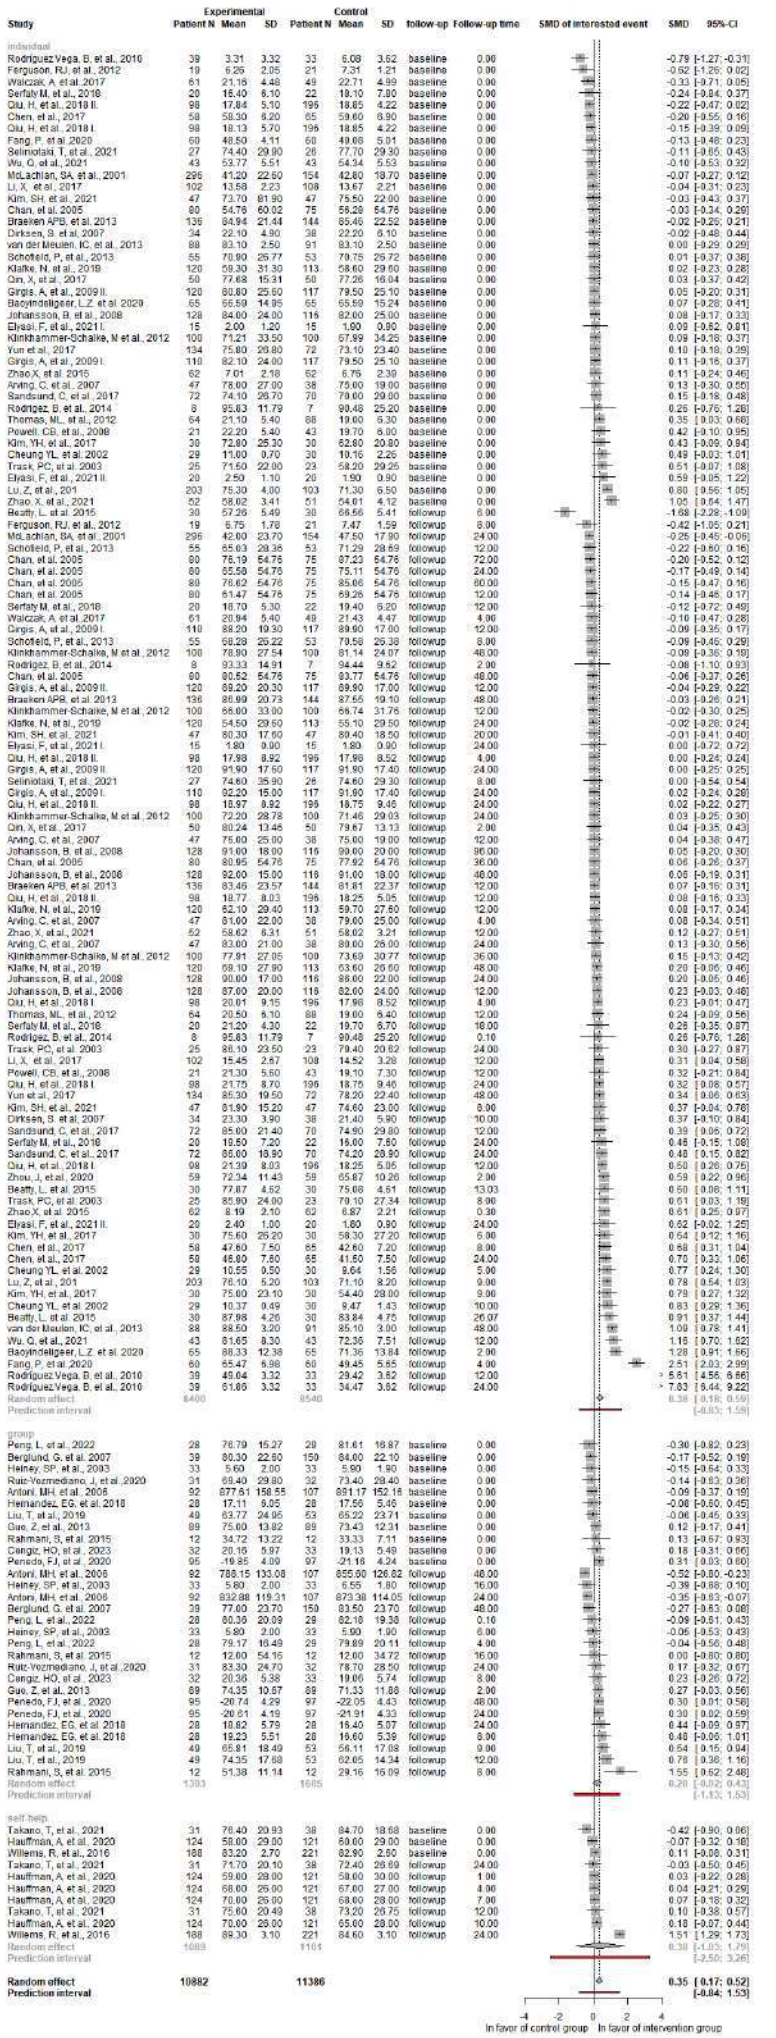

Figure S15.3.T24

| Study                             | Experimental |        |       | Control |        |       | Follow-up time | SMD of interested event | SMD   | 95% CI       |
|-----------------------------------|--------------|--------|-------|---------|--------|-------|----------------|-------------------------|-------|--------------|
|                                   | Patient      | Mean   | SD    | Patient | Mean   | SD    |                |                         |       |              |
| <b>Intervention</b>               |              |        |       |         |        |       |                |                         |       |              |
| Rodriguez-Vega, B, et al., 2010   | 39           | 3.31   | 3.32  | 33      | 6.06   | 3.62  | baseline       | 0.00                    | -0.79 | -1.27 - 0.31 |
| Ferguson, R, et al., 2012         | 19           | 6.26   | 2.05  | 21      | 3.11   | 1.23  | baseline       | 0.00                    | -0.62 | -1.26 - 0.02 |
| Walczak, A, et al., 2017          | 61           | 21.16  | 4.48  | 49      | 22.71  | 4.98  | baseline       | 0.00                    | -0.33 | -0.71 - 0.05 |
| Serfaty, M, et al., 2019          | 20           | 16.40  | 8.10  | 22      | 18.10  | 7.90  | baseline       | 0.00                    | -0.24 | -0.84 - 0.37 |
| Qiu, H, et al., 2018, I           | 95           | 17.64  | 5.10  | 86      | 18.35  | 5.10  | baseline       | 0.00                    | -0.22 | -0.47 - 0.02 |
| Chen, et al., 2017                | 58           | 59.30  | 6.20  | 65      | 59.00  | 6.90  | baseline       | 0.00                    | -0.20 | -0.55 - 0.16 |
| Qiu, H, et al., 2018, I           | 98           | 18.13  | 5.70  | 198     | 18.85  | 4.22  | baseline       | 0.00                    | -0.15 | -0.39 - 0.09 |
| Fang, P, et al., 2020             | 90           | 48.50  | 4.11  | 60      | 49.08  | 6.01  | baseline       | 0.00                    | -0.13 | -0.48 - 0.23 |
| Salmadori, T, et al., 2021        | 97           | 74.40  | 29.90 | 28      | 77.76  | 29.90 | baseline       | 0.00                    | -0.12 | -0.65 - 0.49 |
| Wu, Q, et al., 2021               | 43           | 53.77  | 5.11  | 43      | 54.34  | 5.53  | baseline       | 0.00                    | -0.10 | -0.53 - 0.32 |
| McLendon, SA, et al., 2001        | 236          | 41.20  | 22.56 | 154     | 42.80  | 18.70 | baseline       | 0.00                    | -0.07 | -0.27 - 0.12 |
| Li, X, et al., 2017               | 102          | 163.56 | 23.23 | 102     | 163.56 | 23.23 | baseline       | 0.00                    | -0.04 | -0.31 - 0.23 |
| Kim, SH, et al., 2021             | 47           | 73.70  | 61.90 | 47      | 75.50  | 22.00 | baseline       | 0.00                    | -0.03 | -0.43 - 0.37 |
| Chan, et al., 2005                | 80           | 54.76  | 60.82 | 75      | 56.28  | 54.76 | baseline       | 0.00                    | -0.03 | -0.34 - 0.29 |
| Brokan APB, et al., 2013          | 136          | 84.84  | 21.44 | 144     | 80.46  | 22.22 | baseline       | 0.00                    | -0.02 | -0.26 - 0.21 |
| Klitsken, S, et al., 2007         | 34           | 22.2   | 4.90  | 38      | 22.26  | 6.10  | baseline       | 0.00                    | -0.02 | -0.48 - 0.44 |
| van der Meulen, IC, et al., 2013  | 98           | 83.10  | 2.50  | 91      | 83.10  | 2.50  | baseline       | 0.00                    | -0.02 | -0.29 - 0.29 |
| Schnelld, P, et al., 2013         | 55           | 79.90  | 26.77 | 53      | 70.75  | 26.72 | baseline       | 0.00                    | 0.01  | -0.37 - 0.38 |
| Klafe, N, et al., 2019            | 120          | 59.50  | 31.30 | 113     | 55.80  | 28.50 | baseline       | 0.00                    | 0.02  | -0.23 - 0.28 |
| Qin, X, et al., 2017              | 50           | 77.68  | 15.31 | 50      | 77.26  | 15.04 | baseline       | 0.00                    | 0.03  | -0.37 - 0.42 |
| Girgis, A, et al., 2009, I        | 120          | 89.80  | 25.90 | 117     | 79.50  | 25.10 | baseline       | 0.00                    | 0.05  | -0.20 - 0.31 |
| Bayindirler, LZ, et al., 2020     | 85           | 66.59  | 14.95 | 65      | 65.59  | 15.24 | baseline       | 0.00                    | 0.07  | -0.28 - 0.41 |
| Johansson, B, et al., 2008        | 128          | 84.64  | 24.96 | 116     | 82.06  | 25.00 | baseline       | 0.00                    | 0.08  | -0.17 - 0.33 |
| Elyasi, F, et al., 2021, I        | 15           | 2.00   | 1.20  | 15      | 1.90   | 0.90  | baseline       | 0.00                    | 0.09  | -0.62 - 0.81 |
| Kinhammer-Schake, M, et al., 2012 | 100          | 71.21  | 33.56 | 100     | 67.99  | 34.25 | baseline       | 0.00                    | 0.09  | -0.18 - 0.37 |
| Yun, et al., 2017                 | 134          | 75.60  | 26.30 | 72      | 73.10  | 23.40 | baseline       | 0.00                    | 0.10  | -0.18 - 0.39 |
| Girgis, A, et al., 2009, I        | 119          | 82.40  | 24.96 | 117     | 79.58  | 26.10 | baseline       | 0.00                    | 0.11  | -0.18 - 0.37 |
| Zhao, X, et al., 2015             | 92           | 70.1   | 2.16  | 62      | 6.76   | 2.39  | baseline       | 0.00                    | 0.11  | -0.24 - 0.46 |
| Avning, C, et al., 2007           | 47           | 78.00  | 27.90 | 38      | 75.00  | 19.00 | baseline       | 0.00                    | 0.13  | -0.30 - 0.56 |
| Sandlund, C, et al., 2017         | 72           | 74.70  | 20.70 | 70      | 70.00  | 28.00 | baseline       | 0.00                    | 0.15  | -0.18 - 0.48 |
| Rodriguez, B, et al., 2014        | 6            | 95.83  | 11.78 | 7       | 90.48  | 25.20 | baseline       | 0.00                    | 0.29  | -0.78 - 1.29 |
| Thomas, ML, et al., 2012          | 64           | 21.10  | 5.40  | 68      | 19.00  | 6.30  | baseline       | 0.00                    | 0.35  | -0.03 - 0.68 |
| Powell, CB, et al., 2006          | 21           | 22.20  | 5.40  | 43      | 19.76  | 6.00  | baseline       | 0.00                    | 0.42  | -0.10 - 0.95 |
| Kim, YH, et al., 2017             | 34           | 72.90  | 24.30 | 30      | 72.90  | 24.30 | baseline       | 0.00                    | -0.02 | -0.45 - 0.40 |
| Cheung, YL, et al., 2002          | 29           | 11.00  | 0.70  | 30      | 10.16  | 2.26  | baseline       | 0.00                    | 0.49  | -0.03 - 1.01 |
| Trask, PC, et al., 2003           | 25           | 71.50  | 22.90 | 23      | 58.20  | 29.25 | baseline       | 0.00                    | 0.51  | -0.07 - 1.09 |
| Elyasi, F, et al., 2021, II       | 20           | 2.50   | 1.10  | 20      | 1.90   | 0.90  | baseline       | 0.00                    | 0.59  | -0.05 - 1.22 |
| Li, Z, et al., 2017               | 203          | 76.00  | 16.00 | 163     | 71.10  | 16.00 | baseline       | 0.00                    | 0.63  | -0.08 - 1.09 |
| Zhao, X, et al., 2015             | 52           | 58.02  | 3.41  | 51      | 54.01  | 4.12  | baseline       | 0.00                    | 1.05  | -0.64 - 1.47 |
| Beatty, L, et al., 2015           | 30           | 57.26  | 5.49  | 30      | 65.56  | 5.41  | follow-up      | 6.00                    | -1.68 | -2.28 - 1.09 |
| Ferguson, R, et al., 2012         | 19           | 6.75   | 1.76  | 21      | 4.7    | 1.53  | follow-up      | 6.00                    | -0.47 | -1.05 - 0.11 |
| McLendon, SA, et al., 2001        | 236          | 42.00  | 23.70 | 154     | 47.50  | 17.90 | follow-up      | 24.00                   | -0.25 | -0.45 - 0.06 |
| Schnelld, P, et al., 2013         | 55           | 65.03  | 28.36 | 53      | 71.28  | 26.59 | follow-up      | 12.00                   | -0.22 | -0.60 - 0.16 |
| Chan, et al., 2005                | 80           | 76.19  | 54.76 | 75      | 67.23  | 54.76 | follow-up      | 12.00                   | -0.20 | -0.82 - 0.12 |
| Chan, et al., 2005                | 80           | 65.68  | 54.76 | 75      | 75.11  | 54.76 | follow-up      | 12.00                   | -0.17 | -0.48 - 0.14 |
| Chan, et al., 2005                | 80           | 76.62  | 54.76 | 75      | 85.06  | 54.76 | follow-up      | 12.00                   | -0.15 | -0.47 - 0.16 |
| Chan, et al., 2005                | 80           | 61.47  | 54.76 | 75      | 69.26  | 54.76 | follow-up      | 12.00                   | -0.14 | -0.46 - 0.17 |
| Serfaty, M, et al., 2019          | 20           | 18.70  | 5.30  | 22      | 19.40  | 6.20  | follow-up      | 12.00                   | -0.12 | -0.72 - 0.49 |
| Walczak, A, et al., 2017          | 61           | 67.84  | 9.40  | 49      | 62.64  | 4.47  | follow-up      | 12.00                   | -0.09 | -0.48 - 0.30 |
| Girgis, A, et al., 2009, I        | 110          | 88.20  | 19.30 | 117     | 89.90  | 17.00 | follow-up      | 12.00                   | -0.09 | -0.35 - 0.17 |
| Schnelld, P, et al., 2013         | 55           | 68.26  | 26.22 | 53      | 70.58  | 26.38 | follow-up      | 8.00                    | -0.09 | -0.46 - 0.29 |
| Kinhammer-Schake, M, et al., 2012 | 100          | 78.80  | 27.54 | 100     | 81.14  | 24.70 | follow-up      | 8.00                    | -0.08 | -0.38 - 0.22 |
| Rodriguez, B, et al., 2014        | 8            | 93.33  | 14.91 | 7       | 94.44  | 9.02  | follow-up      | 48.00                   | -0.08 | -1.10 - 0.93 |
| Chan, et al., 2005                | 80           | 80.62  | 54.76 | 75      | 83.77  | 54.76 | follow-up      | 48.00                   | -0.08 | -0.37 - 0.26 |
| Girgis, A, et al., 2009, II       | 120          | 89.20  | 20.30 | 117     | 89.90  | 17.00 | follow-up      | 12.00                   | -0.04 | -0.29 - 0.22 |
| Brokan APB, et al., 2013          | 136          | 85.99  | 20.73 | 144     | 81.58  | 19.10 | follow-up      | 12.00                   | 0.03  | -0.26 - 0.31 |
| Kinhammer-Schake, M, et al., 2012 | 100          | 86.00  | 33.00 | 100     | 86.74  | 31.78 | follow-up      | 12.00                   | -0.02 | -0.30 - 0.25 |
| Klafe, N, et al., 2019            | 120          | 54.50  | 29.90 | 113     | 55.10  | 28.50 | follow-up      | 24.00                   | 0.02  | -0.28 - 0.24 |
| Kim, SH, et al., 2021             | 47           | 69.30  | 17.58 | 47      | 80.40  | 18.50 | follow-up      | 20.00                   | -0.47 | -0.41 - 0.40 |
| Elyasi, F, et al., 2021, I        | 15           | 1.80   | 0.90  | 15      | 1.80   | 0.90  | follow-up      | 24.00                   | 0.00  | -0.72 - 0.72 |
| Qiu, H, et al., 2018, II          | 98           | 17.88  | 9.82  | 198     | 17.96  | 6.52  | follow-up      | 4.00                    | 0.00  | -0.24 - 0.24 |
| Girgis, A, et al., 2009, III      | 120          | 91.90  | 17.50 | 117     | 91.90  | 17.40 | follow-up      | 24.00                   | 0.00  | -0.25 - 0.25 |
| Salmadori, T, et al., 2021        | 97           | 74.60  | 36.96 | 28      | 74.96  | 36.96 | follow-up      | 24.00                   | 0.00  | -0.44 - 0.44 |
| Girgis, A, et al., 2009, I        | 110          | 92.20  | 15.90 | 117     | 91.90  | 17.40 | follow-up      | 24.00                   | 0.02  | -0.24 - 0.28 |
| Kinhammer-Schake, M, et al., 2012 | 100          | 72.20  | 28.78 | 100     | 71.46  | 29.03 | follow-up      | 24.00                   | 0.02  | -0.22 - 0.27 |
| Qin, X, et al., 2017              | 50           | 72.20  | 14.46 | 50      | 72.20  | 14.46 | follow-up      | 24.00                   | 0.03  | -0.25 - 0.30 |
| Avning, C, et al., 2007           | 47           | 76.00  | 25.06 | 38      | 75.00  | 19.00 | follow-up      | 12.00                   | 0.03  | -0.30 - 0.37 |
| Johansson, B, et al., 2008        | 128          | 91.00  | 18.90 | 116     | 90.00  | 18.00 | follow-up      | 12.00                   | 0.04  | -0.38 - 0.47 |
| Chan, et al., 2005                | 80           | 69.65  | 54.76 | 75      | 71.92  | 54.76 | follow-up      | 12.00                   | 0.05  | -0.20 - 0.30 |
| Johansson, B, et al., 2008        | 128          | 92.00  | 15.90 | 116     | 91.00  | 18.00 | follow-up      | 48.00                   | 0.05  | -0.18 - 0.31 |
| Brokan APB, et al., 2013          | 136          | 83.46  | 23.57 | 144     | 81.81  | 22.37 | follow-up      | 12.00                   | 0.07  | -0.18 - 0.31 |
| Qiu, H, et al., 2018, I           | 98           | 18.77  | 9.03  | 198     | 19.25  | 6.05  | follow-up      | 12.00                   | 0.08  | -0.16 - 0.33 |
| Avning, C, et al., 2007           | 47           | 82.10  | 23.46 | 38      | 82.10  | 23.46 | follow-up      | 12.00                   | 0.08  | -0.17 - 0.33 |
| Avning, C, et al., 2007           | 47           | 81.00  | 22.90 | 38      | 79.00  | 25.00 | follow-up      | 12.00                   | 0.08  | -0.34 - 0.51 |
| Zhao, X, et al., 2015             | 52           | 58.62  | 3.31  | 51      | 55.02  | 3.21  | follow-up      | 12.00                   | 0.12  | -0.27 - 0.51 |
| Avning, C, et al., 2007           | 47           | 83.00  | 21.96 | 38      | 80.00  | 26.00 | follow-up      | 24.00                   | 0.13  | -0.30 - 0.56 |
| Kinhammer-Schake, M, et al., 2012 | 100          | 79.10  | 31.06 | 100     | 73.99  | 30.77 | follow-up      | 24.00                   | 0.13  | -0.13 - 0.42 |
| Klafe, N, et al., 2019            | 120          | 59.10  | 27.90 | 113     | 63.60  | 26.50 | follow-up      | 48.00                   | 0.20  | -0.06 - 0.46 |
| Johansson, B, et al., 2008        | 128          | 90.00  | 18.90 | 116     | 86.00  | 22.00 | follow-up      | 24.00                   | 0.20  | -0.05 - 0.46 |
| Johansson, B, et al., 2008        | 128          | 87.60  | 20.96 | 116     | 82.90  | 20.40 | follow-up      | 12.00                   | 0.23  | -0.23 - 0.73 |
| Qiu, H, et al., 2018, I           | 98           | 20.01  | 9.15  | 198     | 17.96  | 8.52  | follow-up      | 4.00                    | 0.23  | -0.01 - 0.47 |
| Thomas, ML, et al., 2012          | 64           | 20.60  | 6.10  | 68      | 19.00  | 6.40  | follow-up      | 12.00                   | 0.24  | -0.09 - 0.59 |
| Serfaty, M, et al., 2019          | 20           | 21.20  | 4.90  | 22      | 19.70  | 6.70  | follow-up      | 18.00                   | 0.26  | -0.35 - 0.87 |
| Rodriguez, B, et al., 2014        | 6            | 95.83  | 11.78 | 7       | 90.48  | 25.20 | follow-up      | 18.00                   | 0.26  | -0.21 - 0.73 |
| Trask, PC, et al., 2003           | 25           | 65.10  | 23.50 | 23      | 79.40  | 26.62 | follow-up      | 24.00                   | 0.32  | -0.07 - 0.67 |
| Li, X, et al., 2017               | 102          | 15.45  | 2.67  | 106     | 14.52  | 3.28  | follow-up      | 12.00                   | 0.31  | -0.04 - 0.88 |
| Powell, CB, et al., 2006          | 21           | 21.50  | 5.60  | 43      | 19.10  | 7.30  | follow-up      | 12.00                   | 0.32  | -0.21 - 0.86 |
| Qiu, H, et al., 2018, II          | 98           | 21.99  | 9.03  | 198     | 19.75  | 9.48  | follow-up      | 24.00                   | 0.33  | -0.08 - 0.48 |
| Yun, et al., 2017                 | 134          | 85.90  | 19.56 | 72      | 79.20  | 22.40 | follow-up      | 48.00                   | 0.34  | -0.06 - 0.33 |
| Kim, SH, et al., 2021             | 47           | 81.90  | 15.20 | 47      | 74.90  | 23.00 | follow-up      | 8.00                    | 0.37  | -0.04 - 0.76 |
| Klitsken, S, et al., 2007         | 34           | 23.30  | 3.96  | 38      | 21.40  | 1.83  | follow-up      | 12.00                   | 0.37  | -0.17 - 0.84 |
| Sandlund, C, et al., 2017         | 72           | 85.00  | 21.40 | 70      | 74.90  | 29.80 | follow-up      | 12.00                   | 0.39  | -0.08 - 0.72 |
| Serfaty, M, et al., 2019          | 20           | 19.60  | 7.20  | 22      | 15.00  | 7.60  | follow-up      | 24.00                   | 0.45  | -0.15 - 1.09 |

Figure S15.4.T48

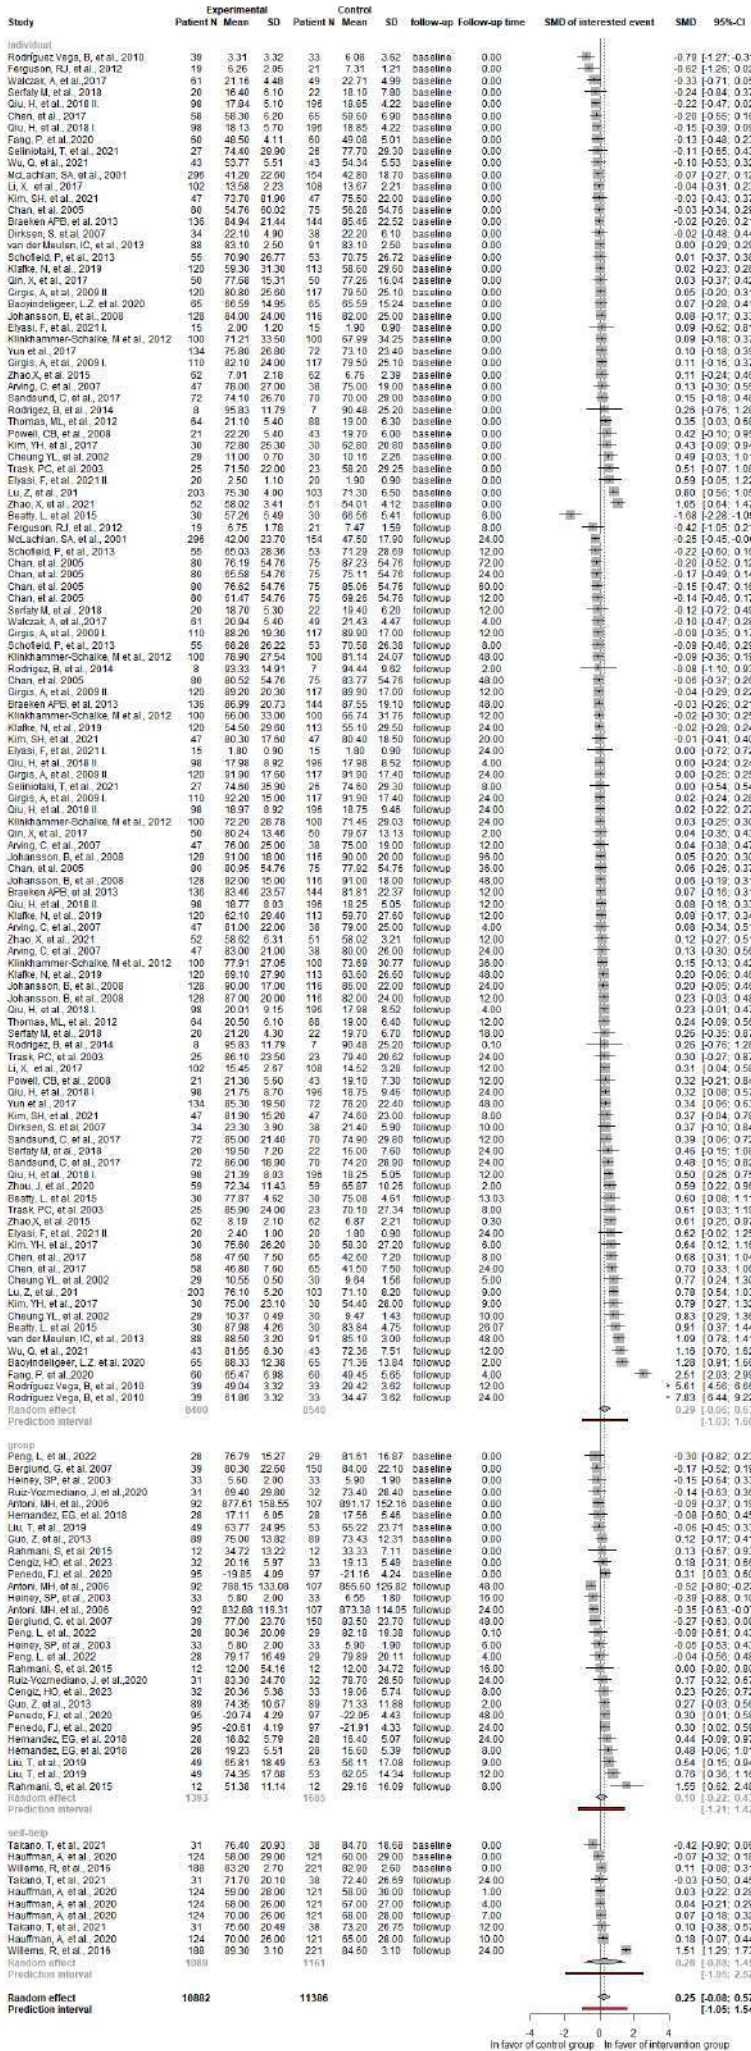

## S16.Subgroup analysis of Social QoL: Cancer stage

Figure S16.1.T0

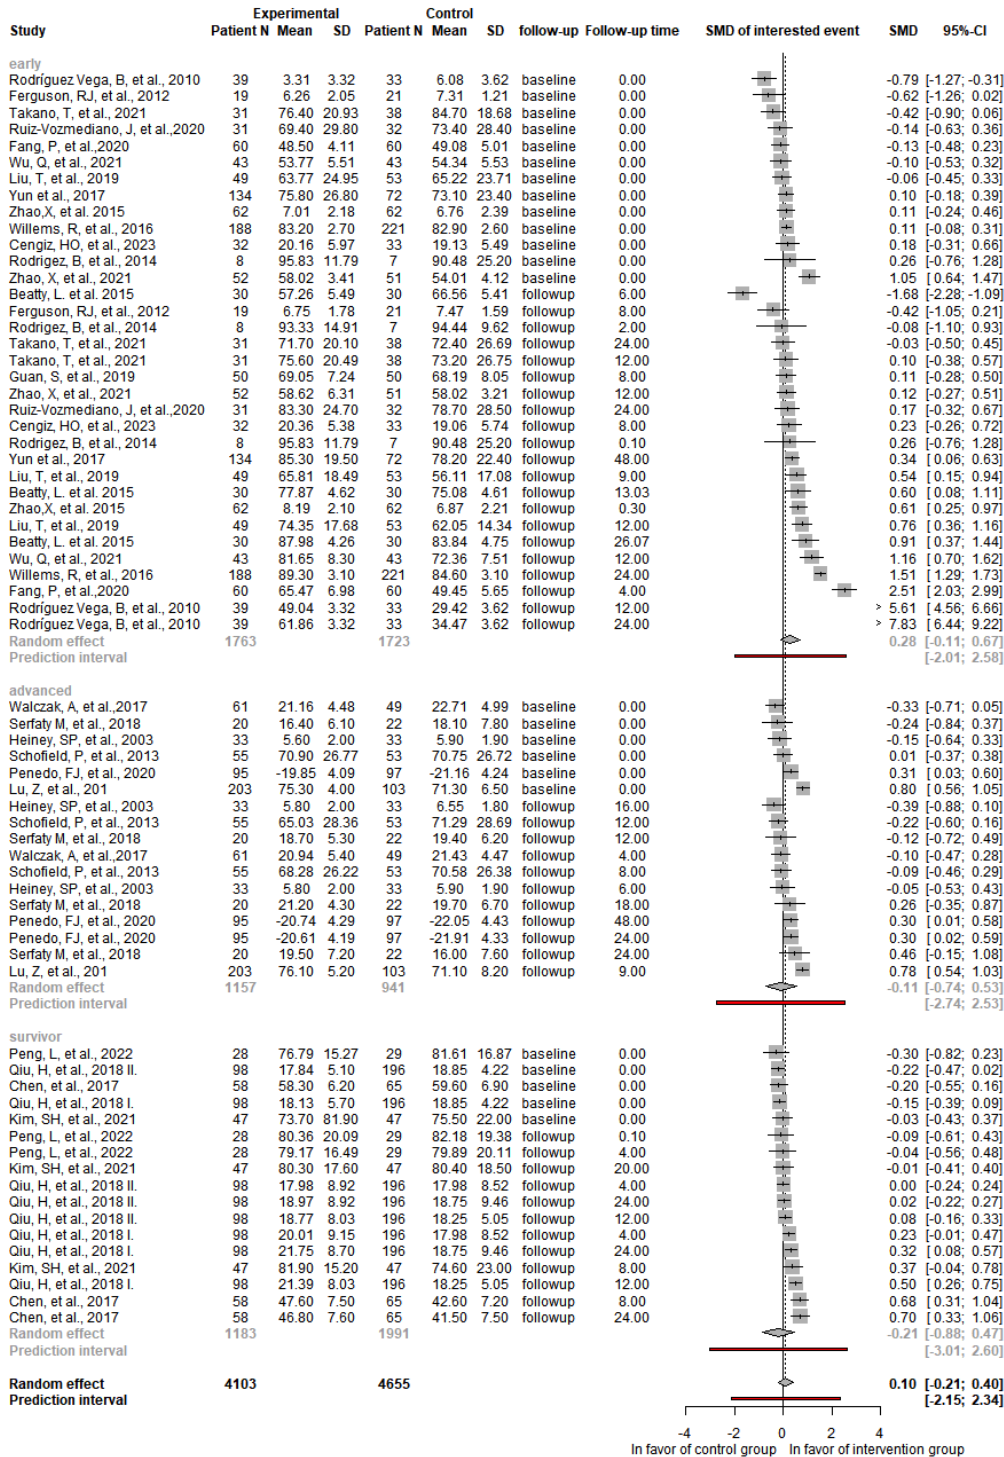

Figure S16.1. Forest plot represents the difference between the intervention vs. control group in the Social QoL domain with the cancer stage subgroups as predicted at week 0 (post-intervention). SMD - Standardized mean difference, CI - confidence interval.

Figure S16.2.T12

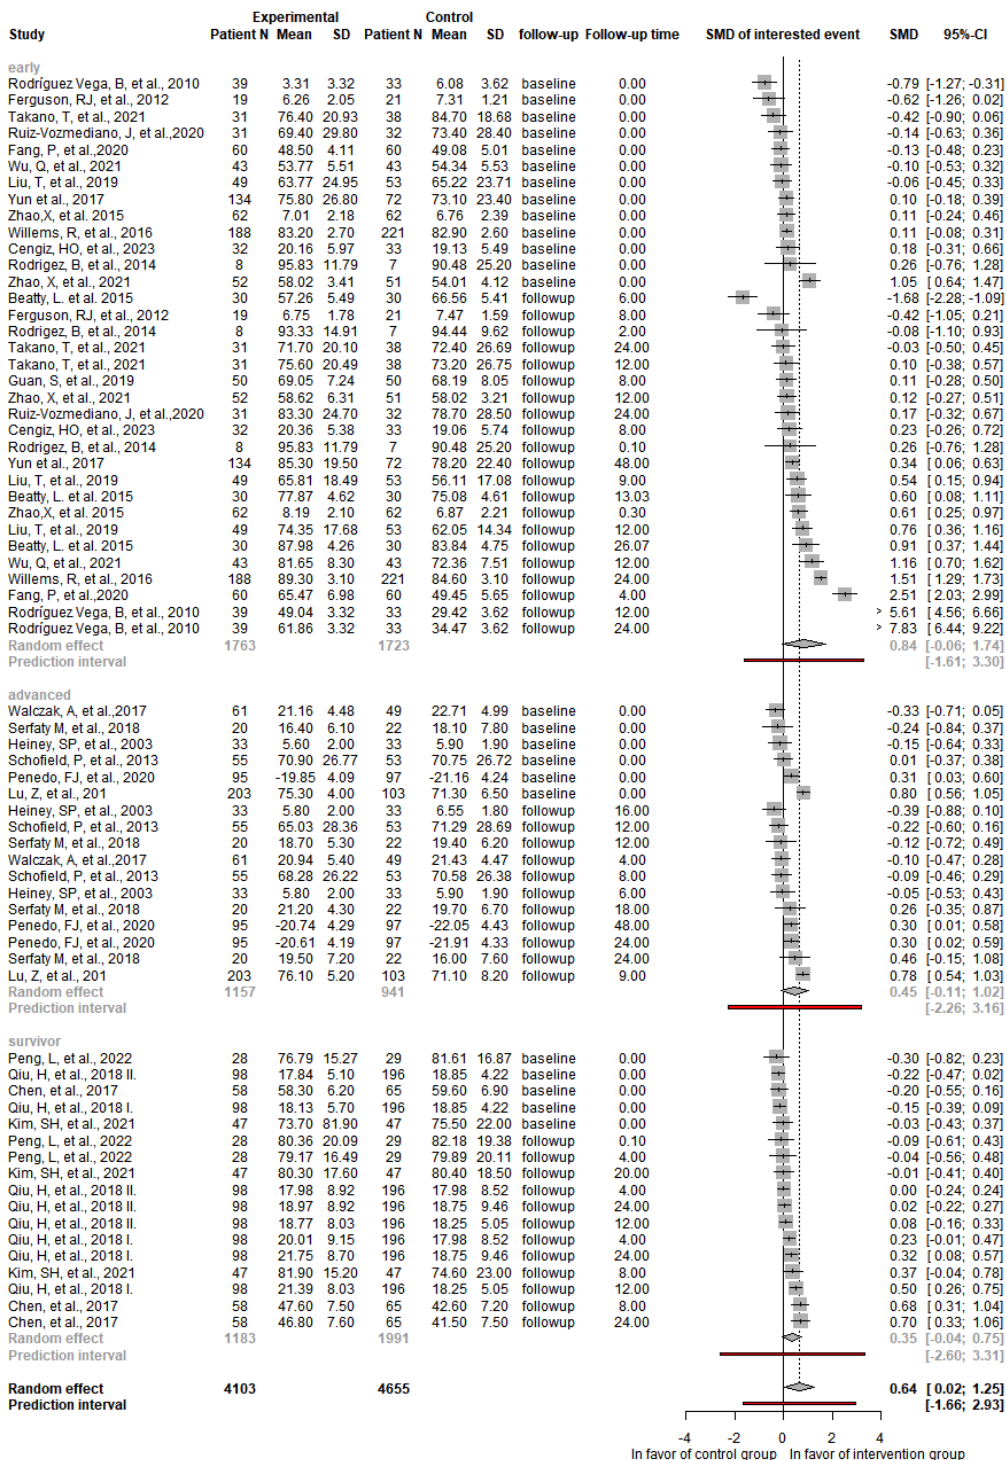

Figure S16.2. Forest plot represents the difference between the intervention vs. control group in the Social QoL domain with the cancer stage subgroups as predicted at week 12 (post-intervention). SMD - Standardized mean difference, CI - confidence interval.

Figure S16.3.T24

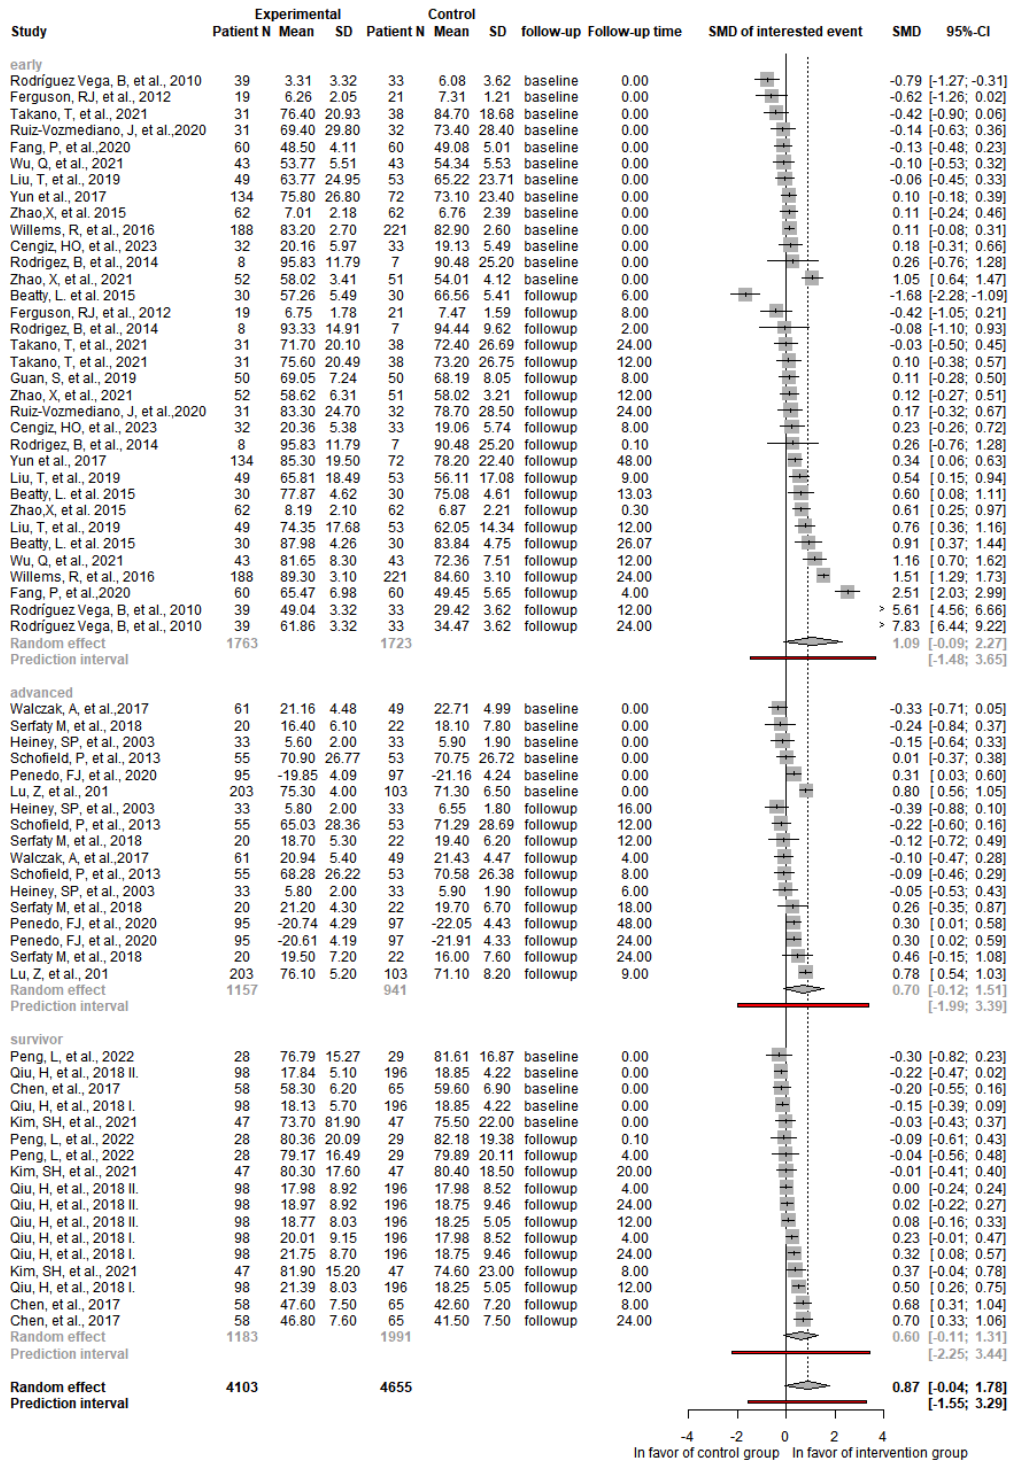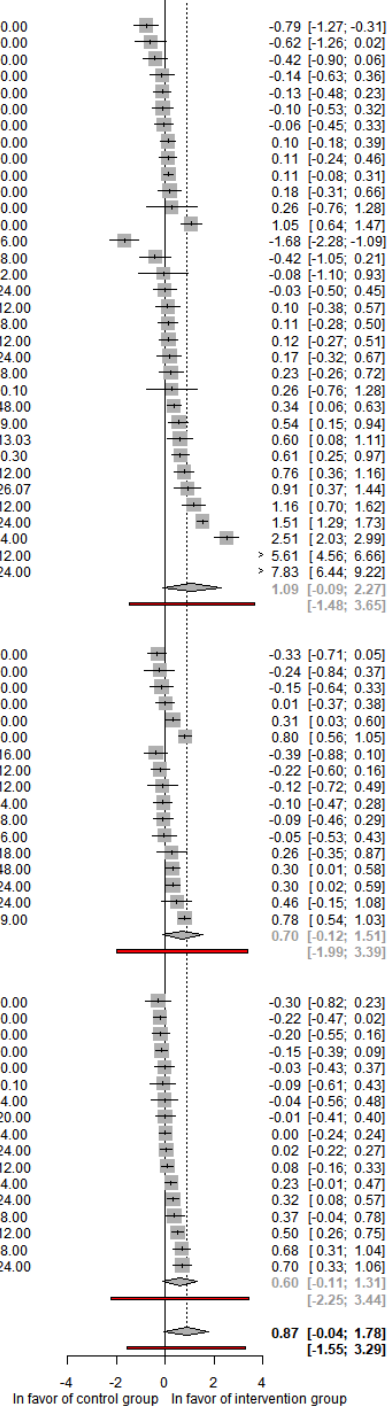

Figure S16.3. Forest plot represents the difference between the intervention vs. control group in the Social QoL domain with the cancer stage subgroups as predicted at week 24 (post-intervention). SMD - Standardized mean difference, CI - confidence interval.

Figure S16.4.T48

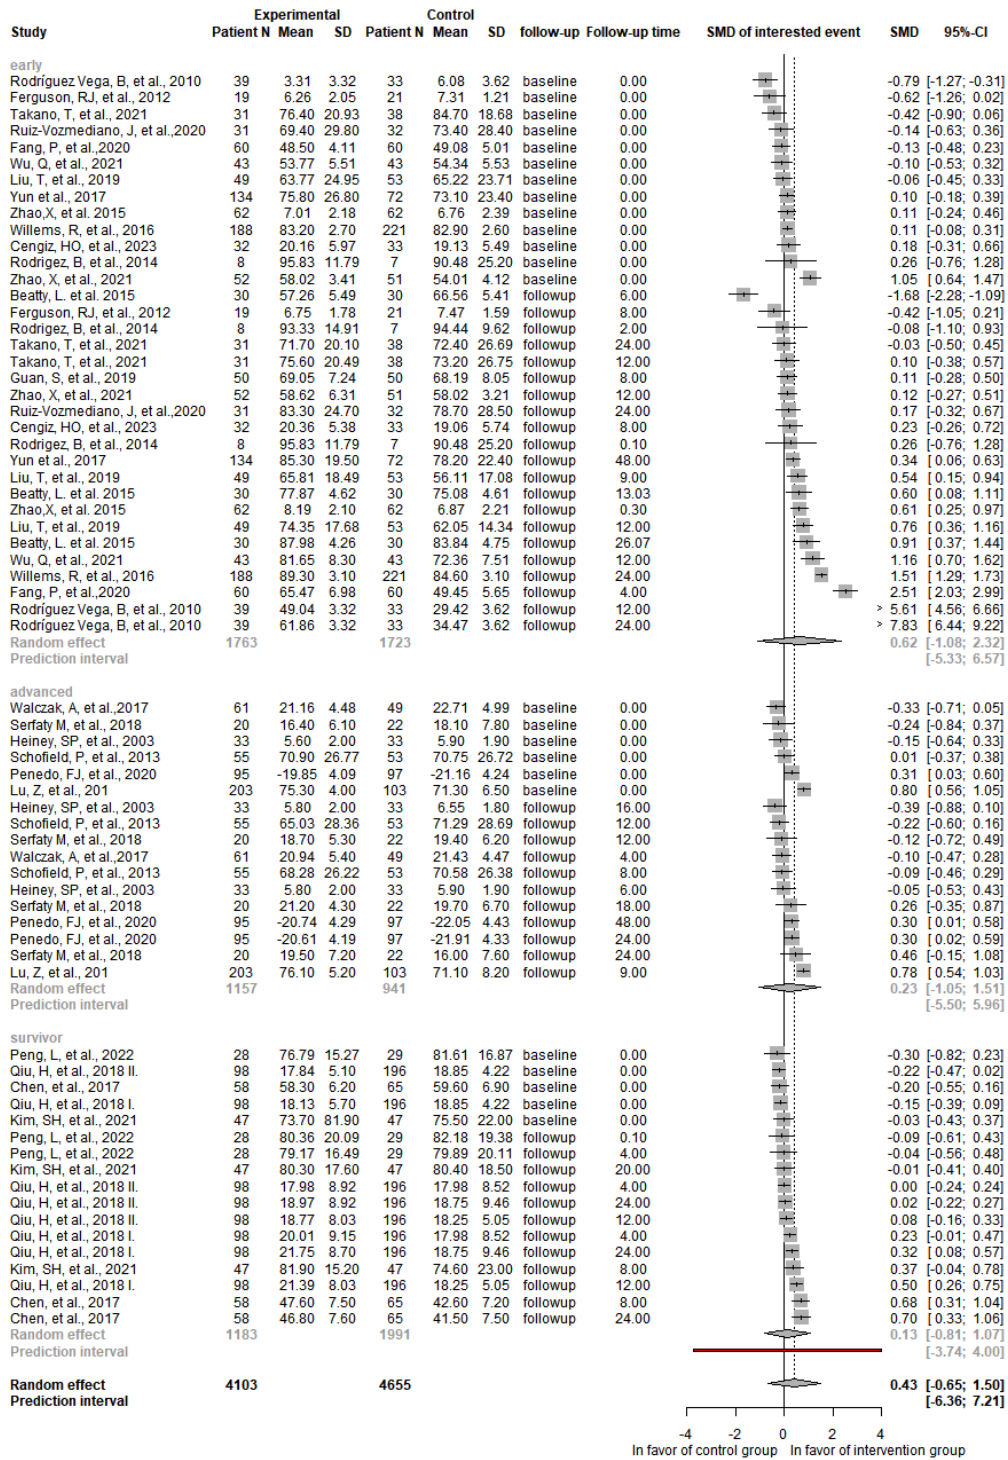

Figure S16.4. Forest plot represents the difference between the intervention vs. control group in the Social QoL domain with the cancer stage subgroups as predicted at week 48 (post-intervention). SMD - Standardized mean difference, CI - confidence interval.



## S17.Subgroup analysis of Social QoL: Cancer type

Figure S17.1.T0

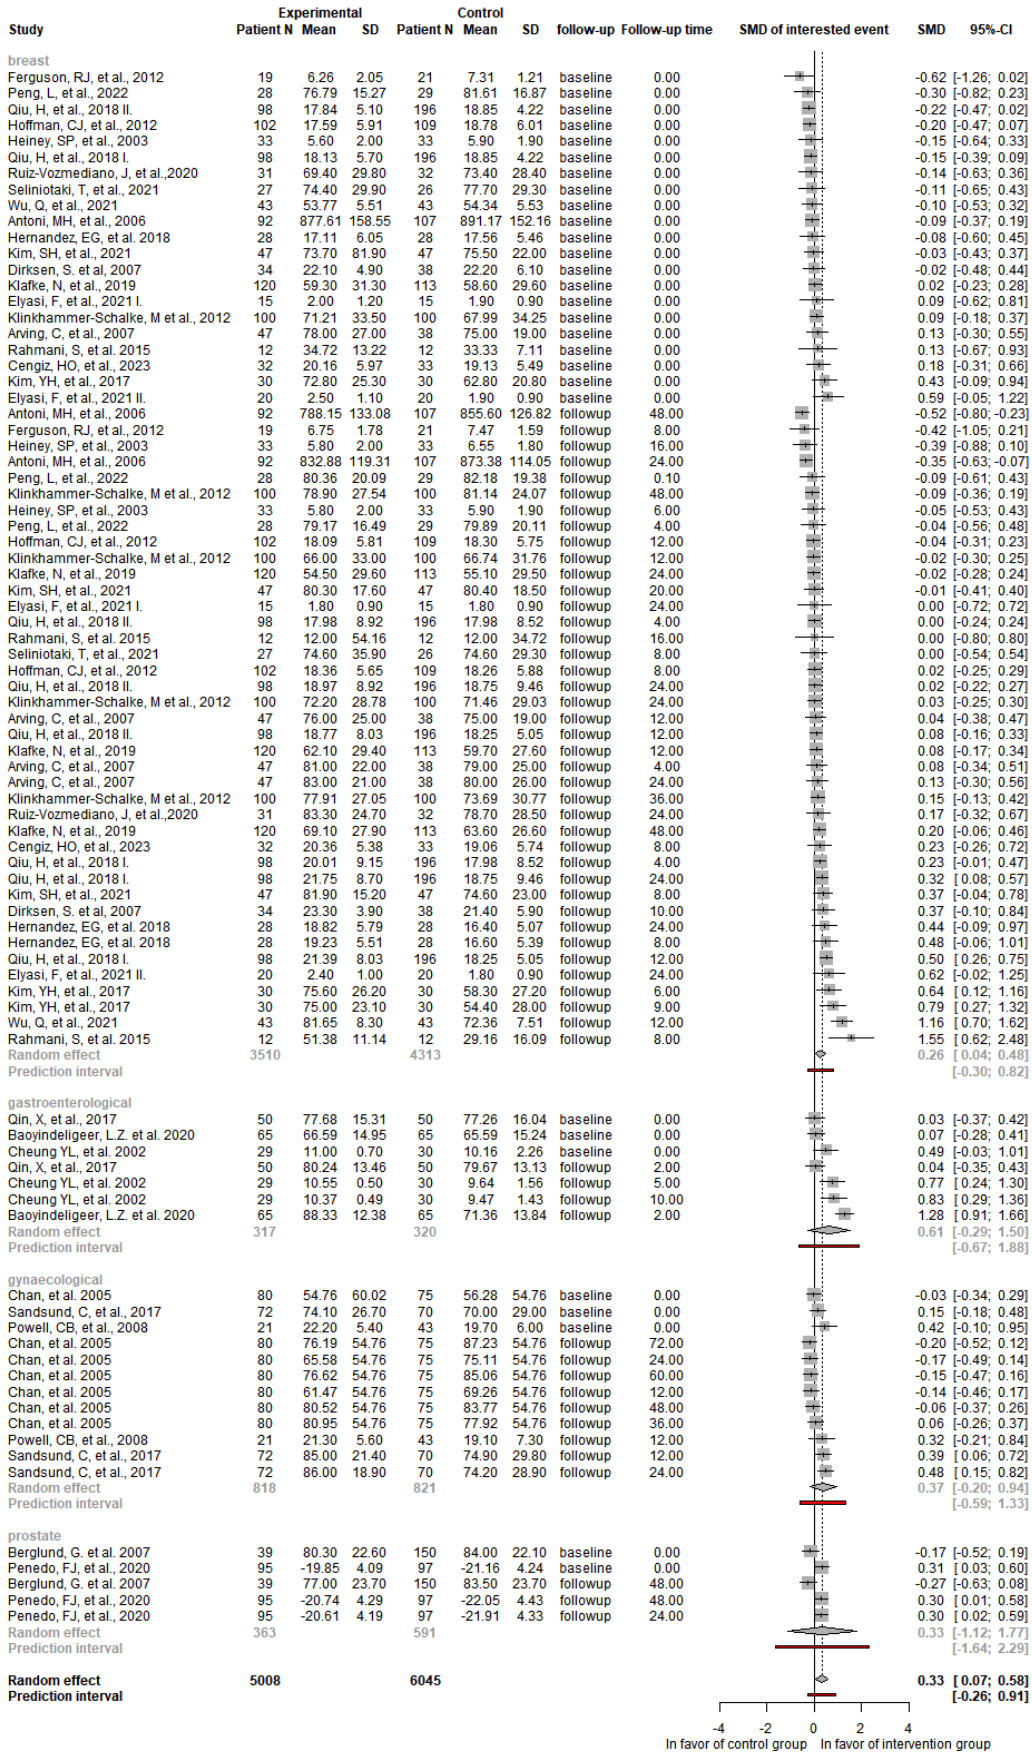

Figure S17.2.T12

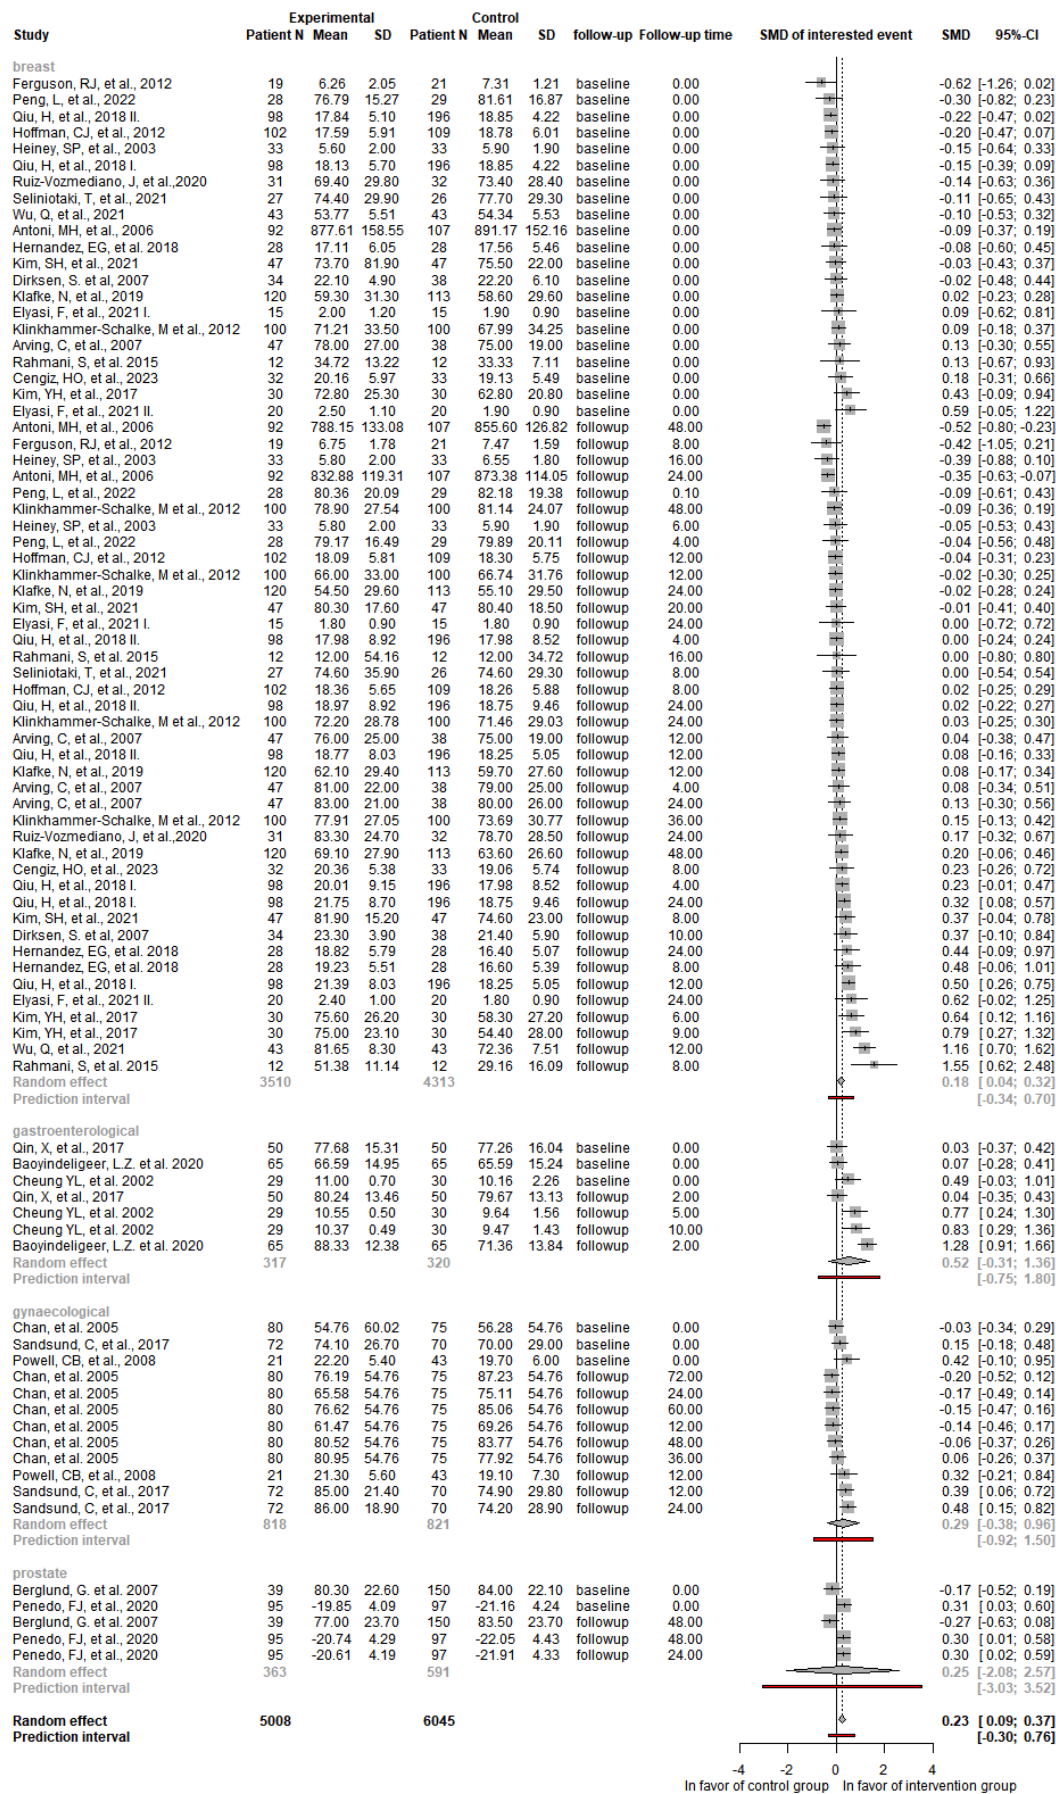

Figure S17.3.T24

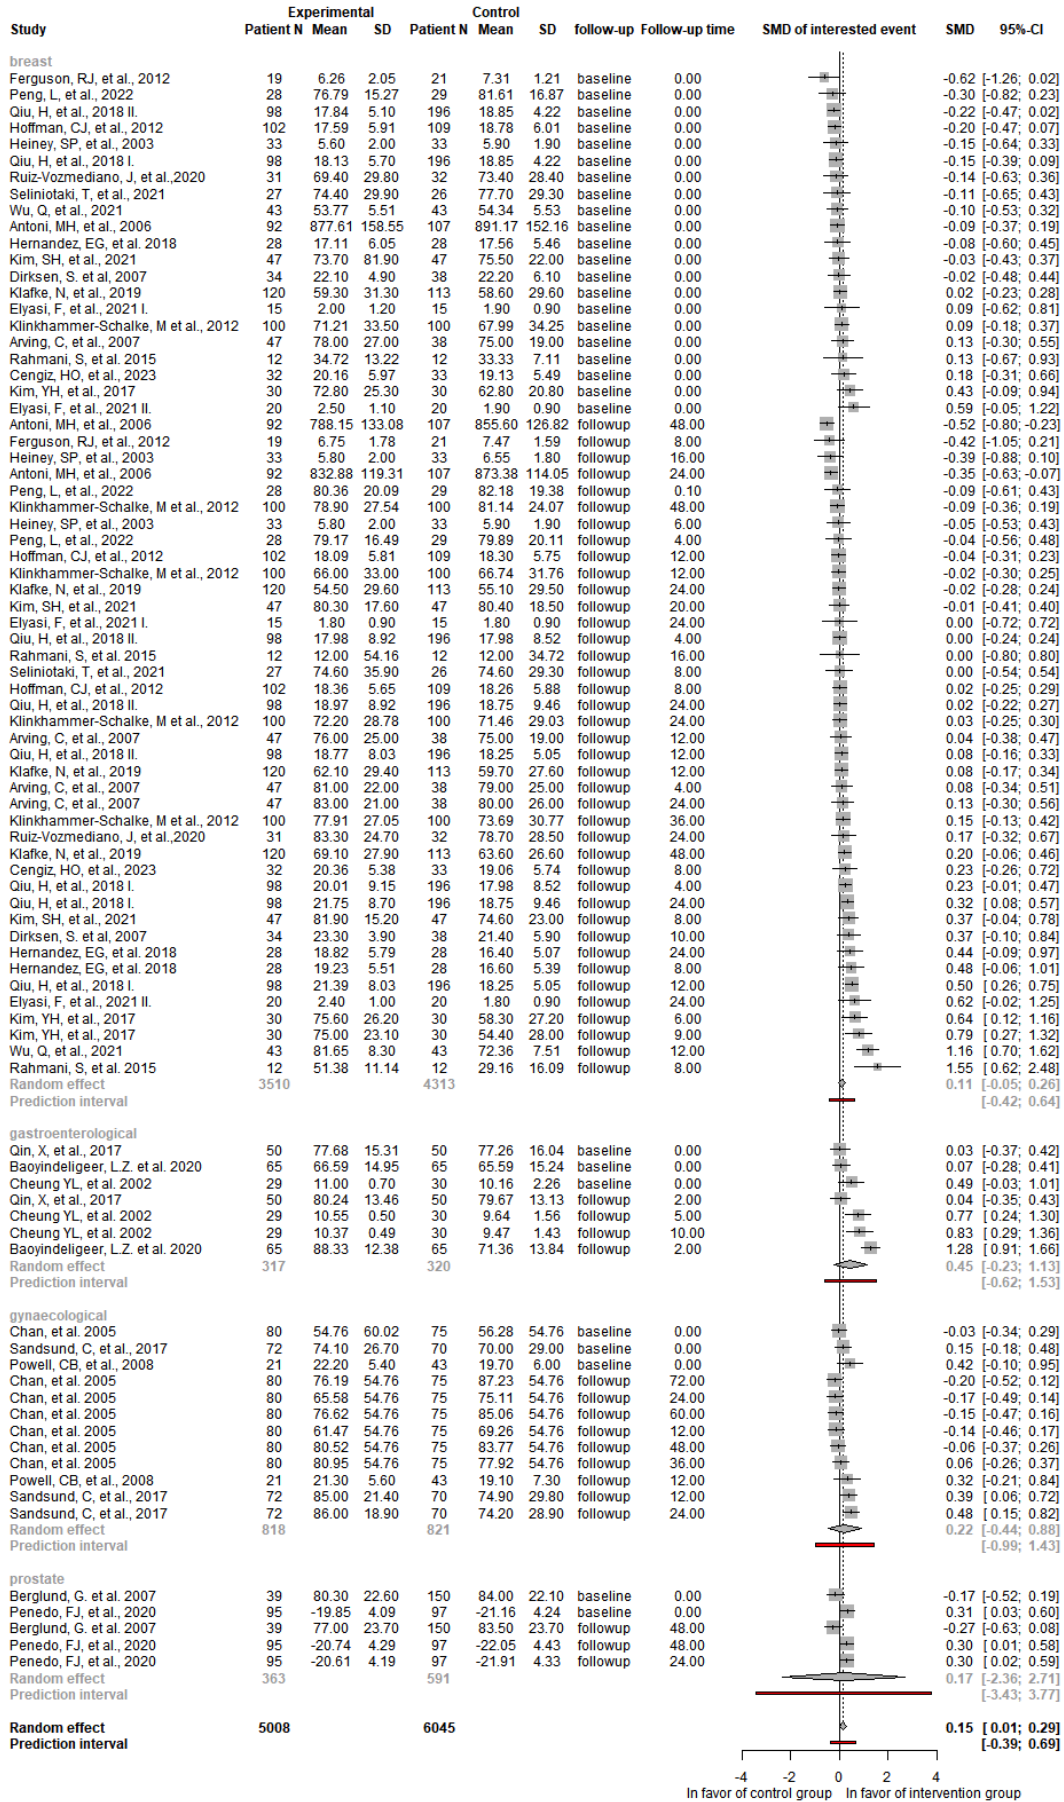

Figure S17.4.T48

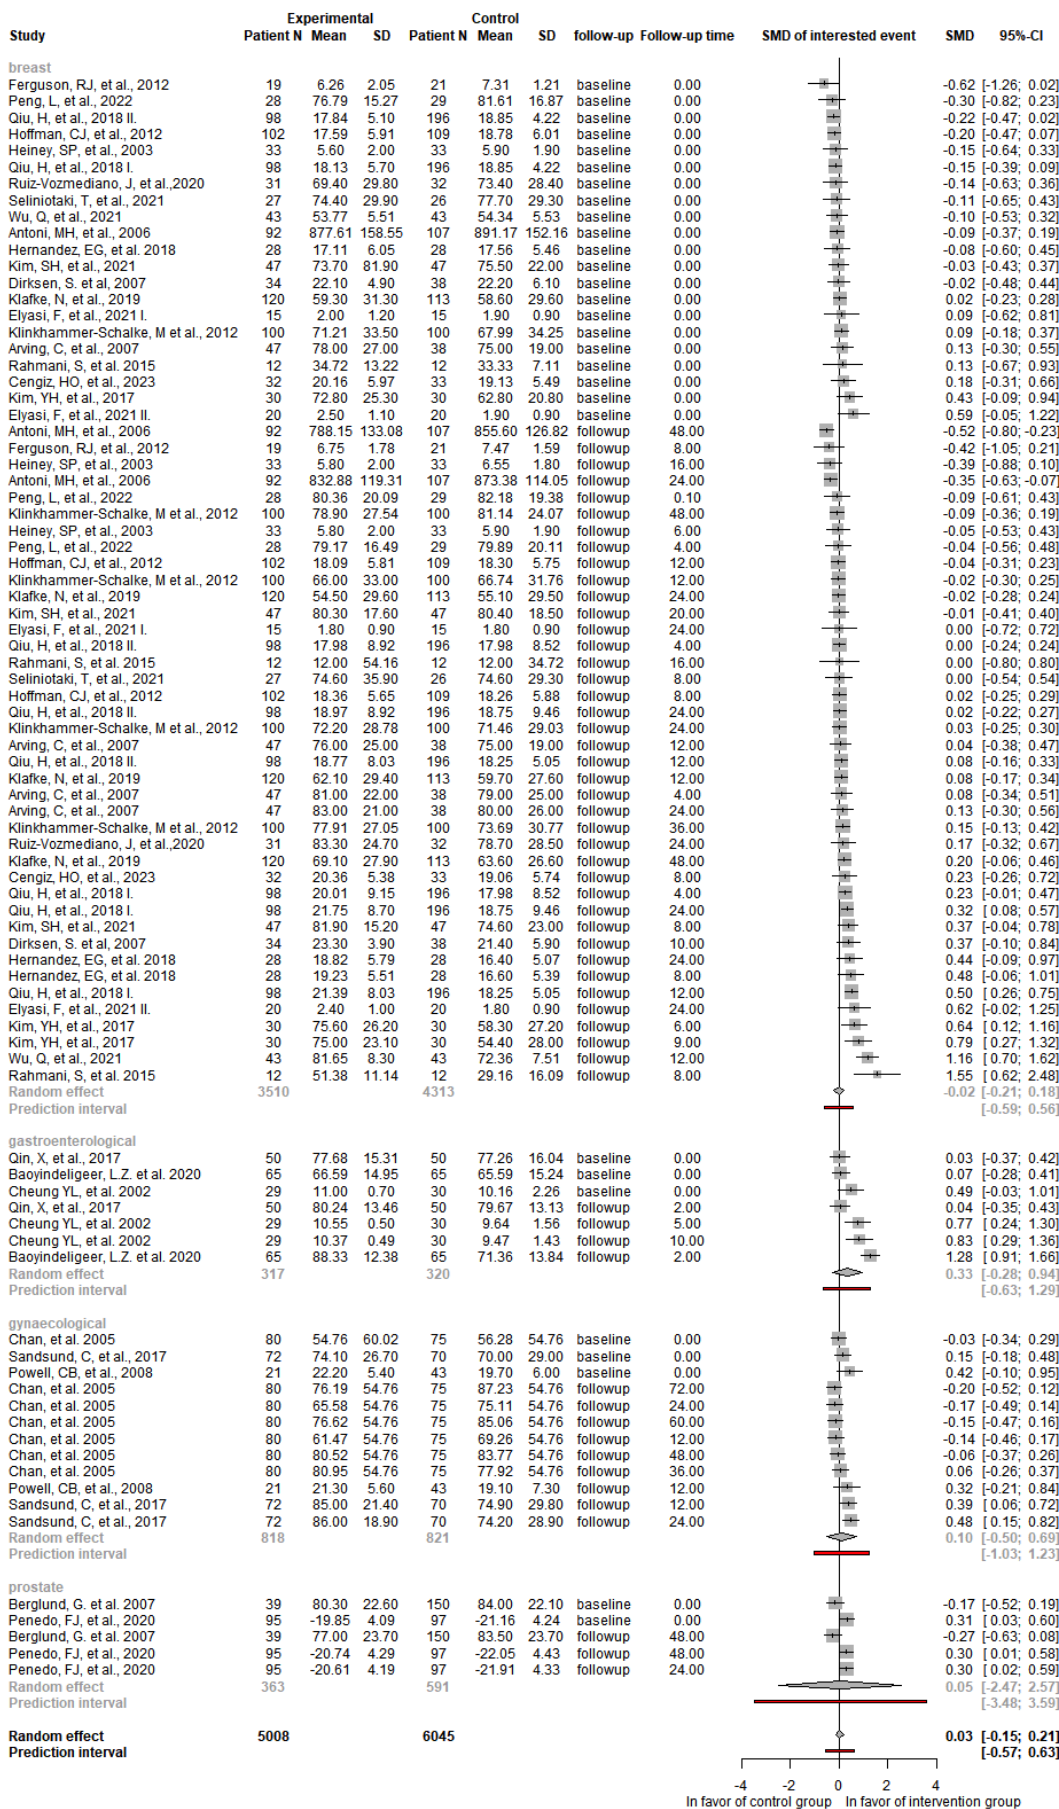

## S18. Subgroup analysis of Physical QoL: Provider

**Figure S18.1.T0**

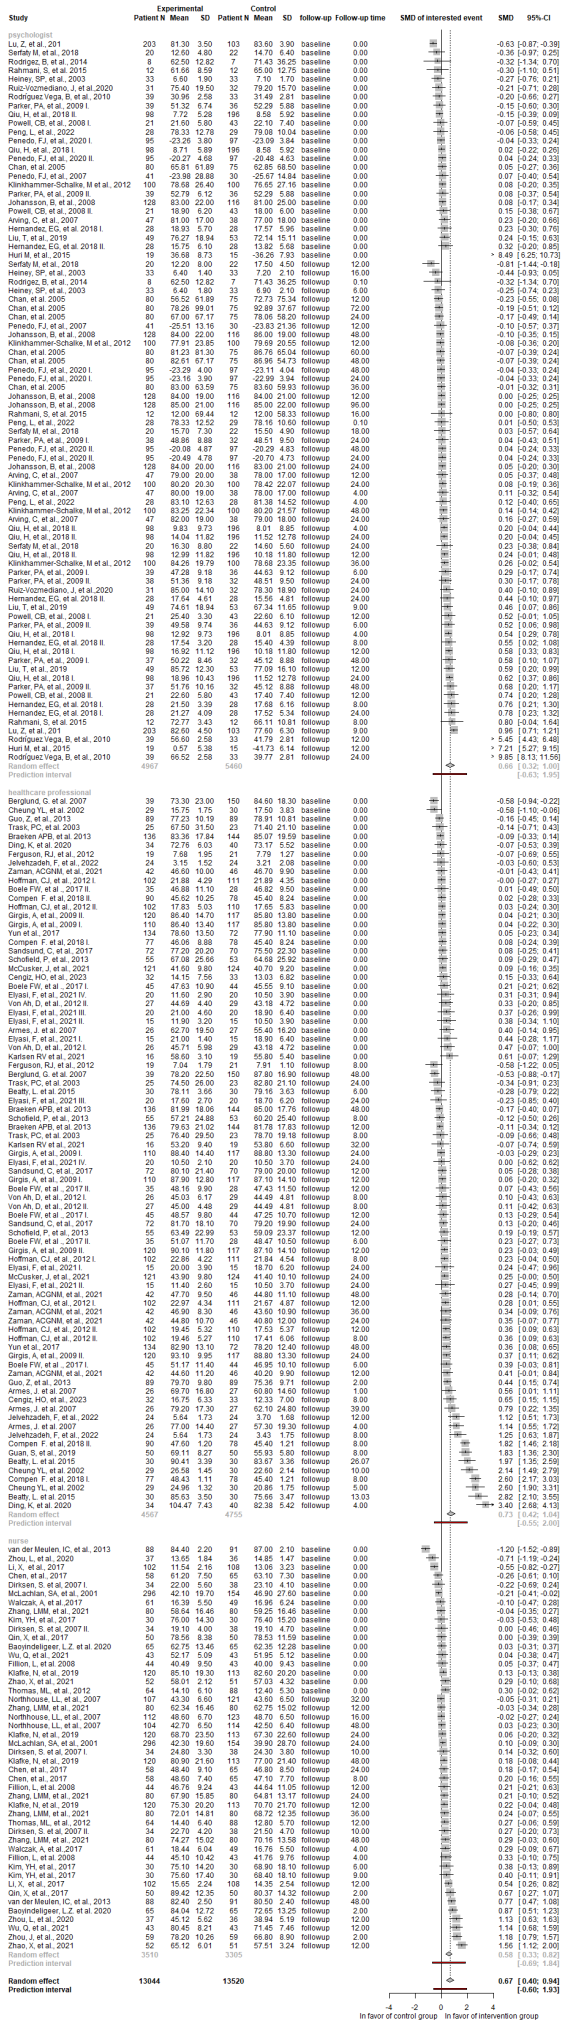

Figure S18.2.T12

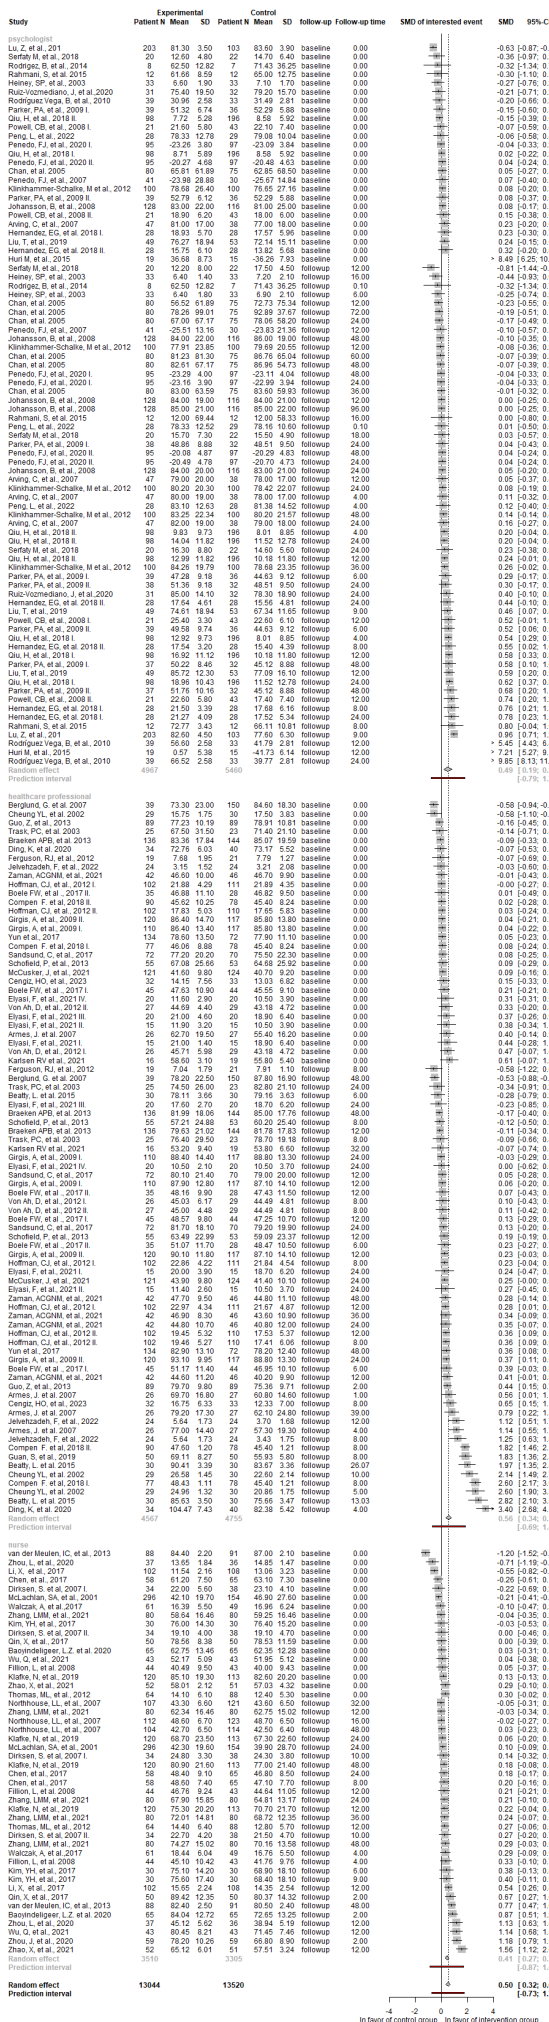



Figure S18.3.T24

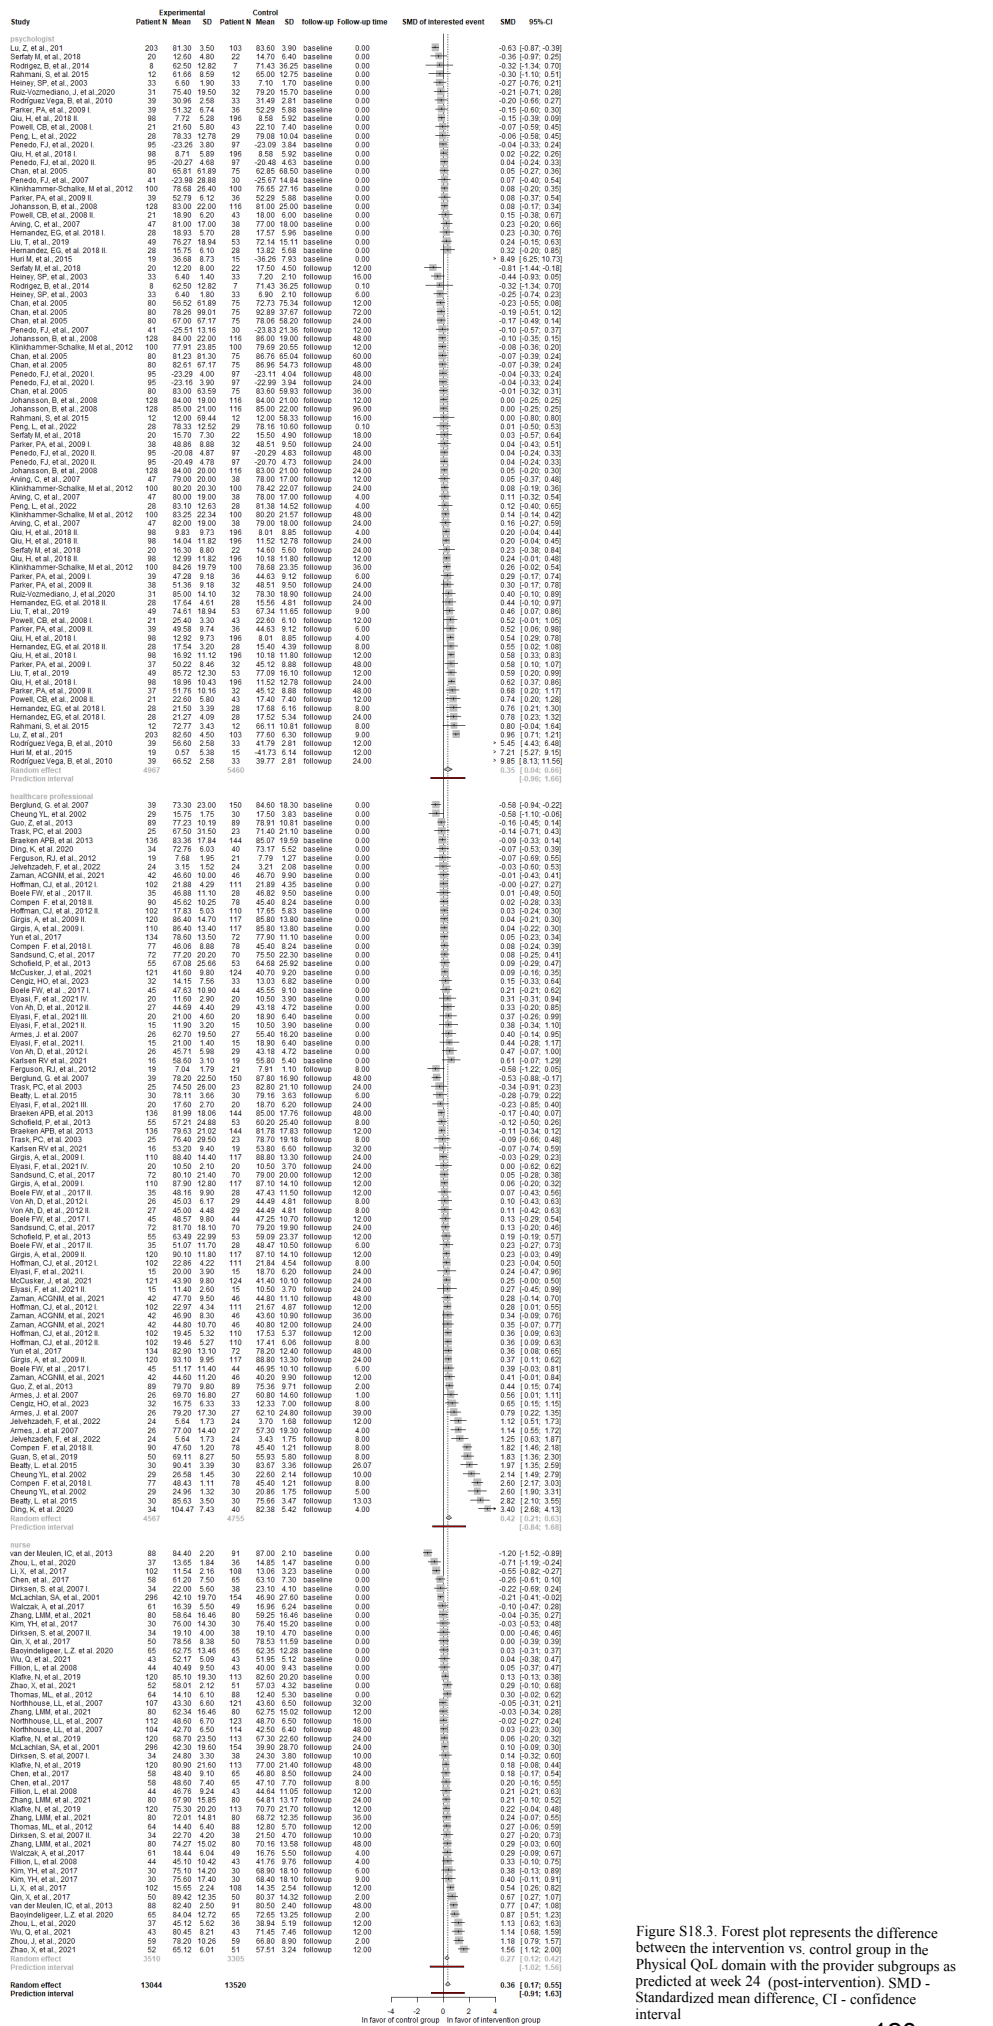

Figure S18.3. Forest plot represents the difference between the intervention vs. control group in the Physical QoL domain with the provider subgroups as standardized at week 24 (post-intervention). SMD - Standardized mean difference, CI - confidence interval

Figure S18.4.T48

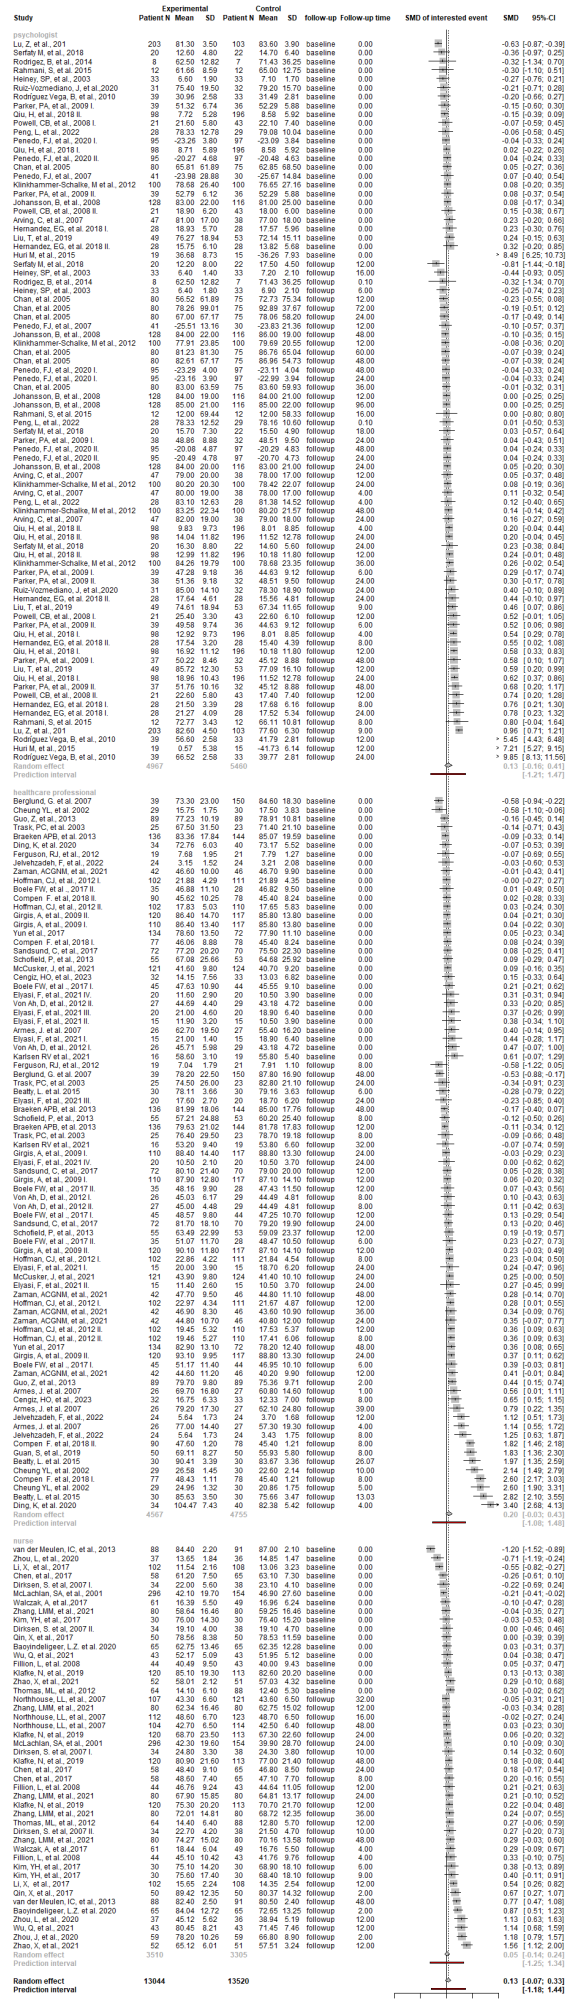

Figure S18.4. Forest plot represents the difference between the intervention vs. control group in the Physical QoL domain with the provider subgroups as predicted at week 48 (post-intervention). SMD - Standardized mean difference, CI - confidence interval

## S19. Subgroup analysis of Physical QoL: Environment

Figure S19.1.T0

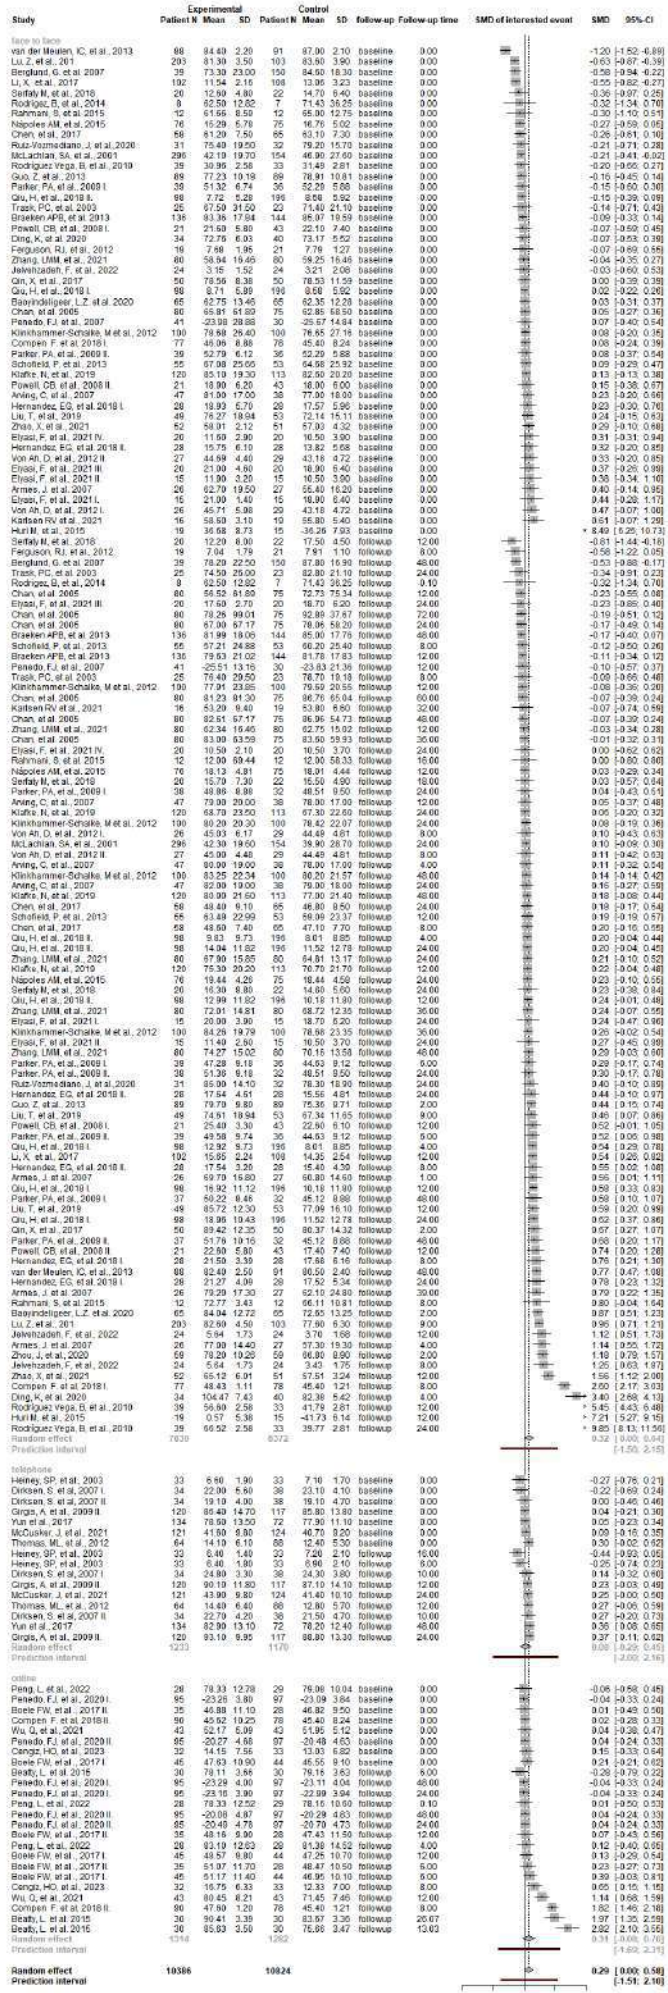

Figure S19.2.T12

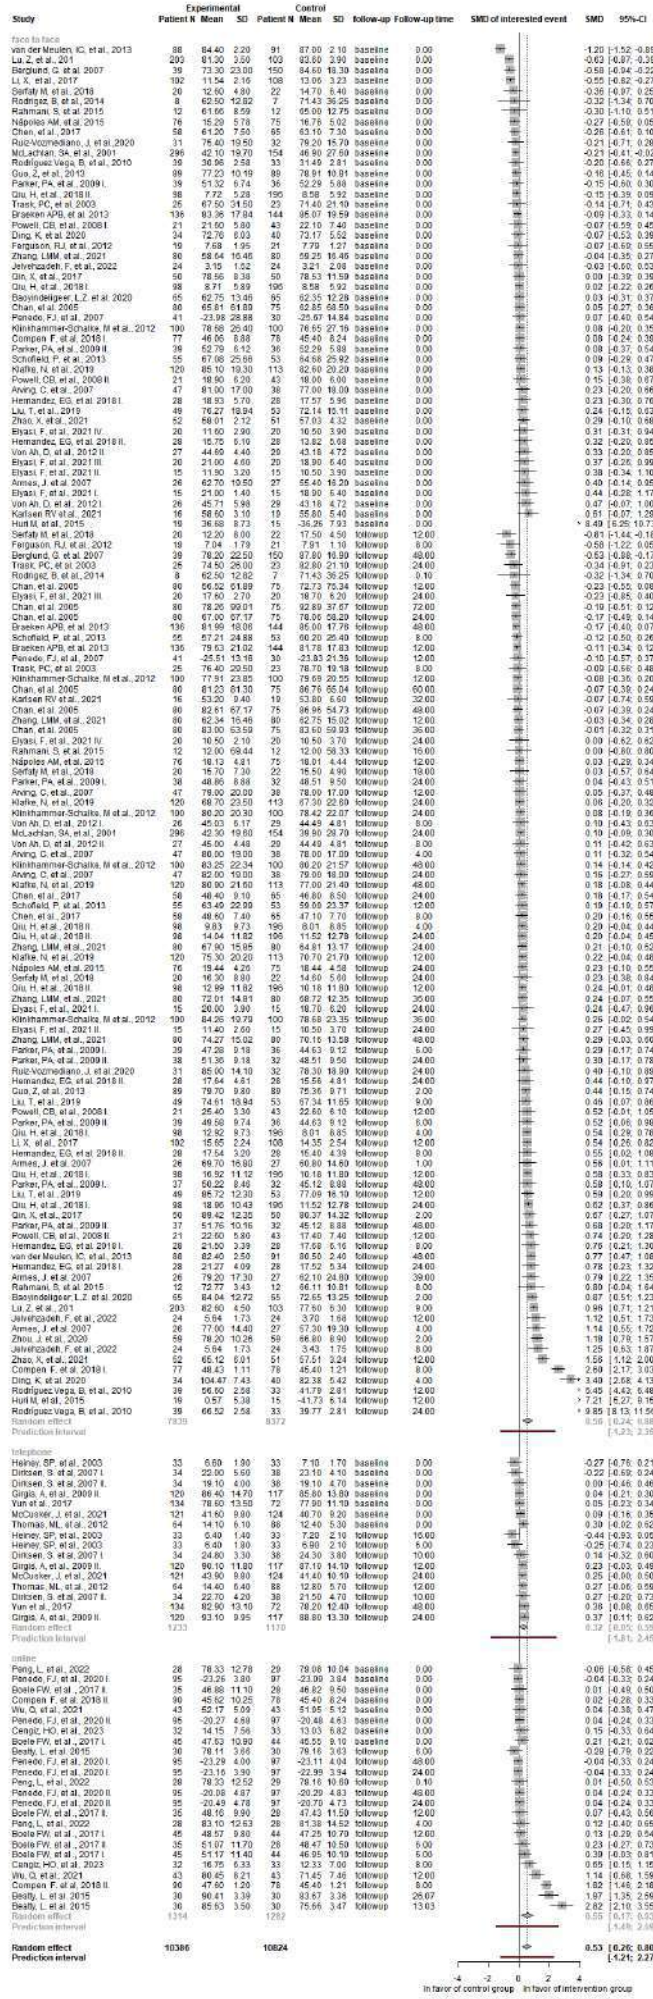

Figure S19.2. Forest plot represents the difference between the intervention vs. control group in the Physical QoL domain with the environment subgroups as predicted at week 12 (post-intervention). SMD - Standardized mean difference, CI - confidence interval.

**Figure S19.3.T24**

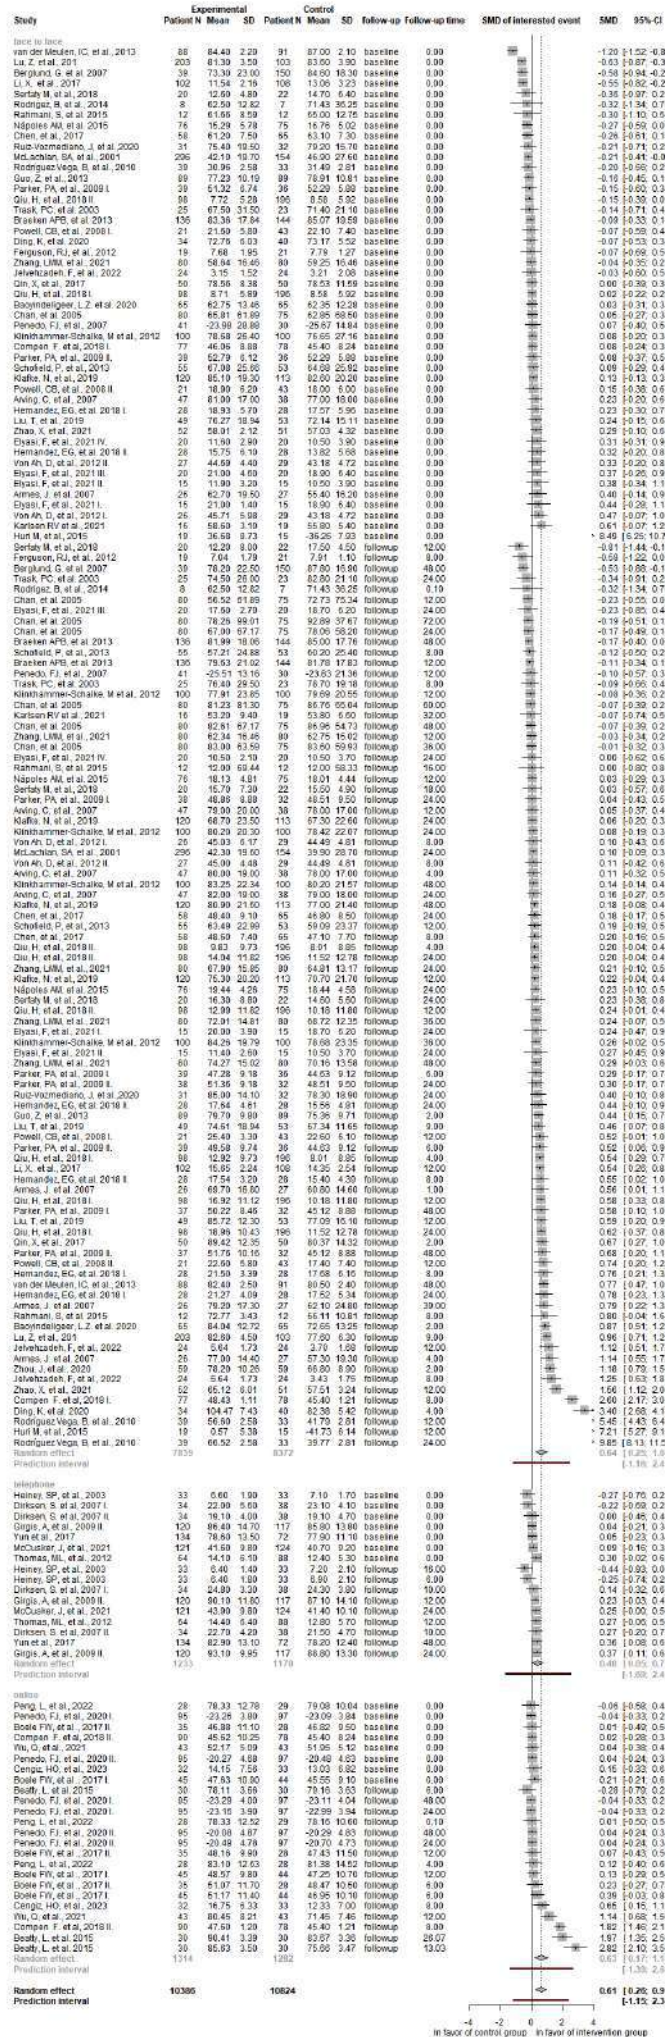

Figure S19.4.T48

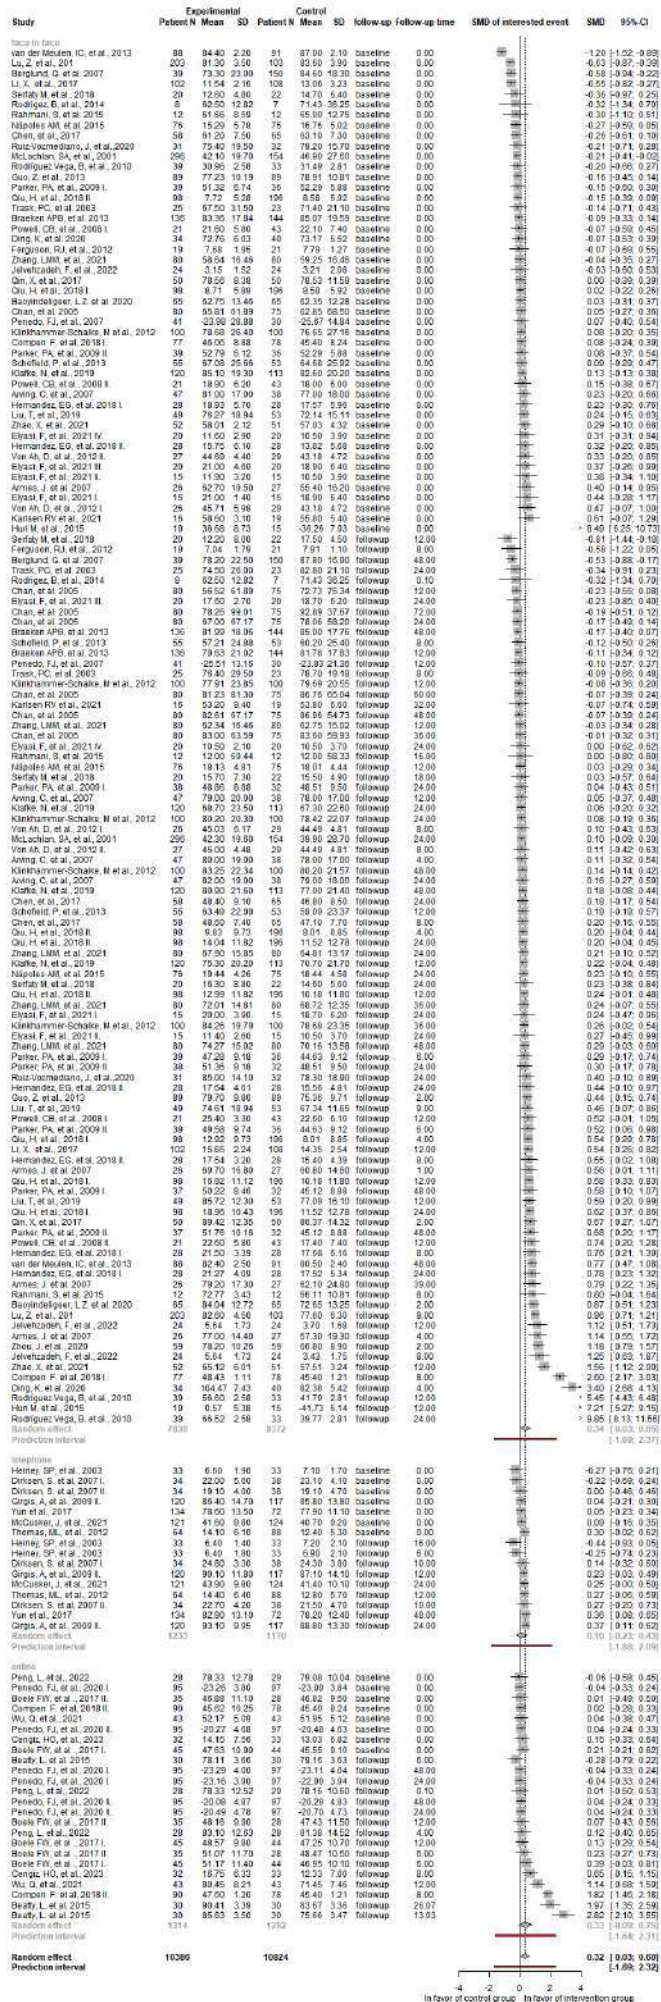

## S20. Subgroup analysis of Physical QoL: Type



**Figure S20.1.T0**

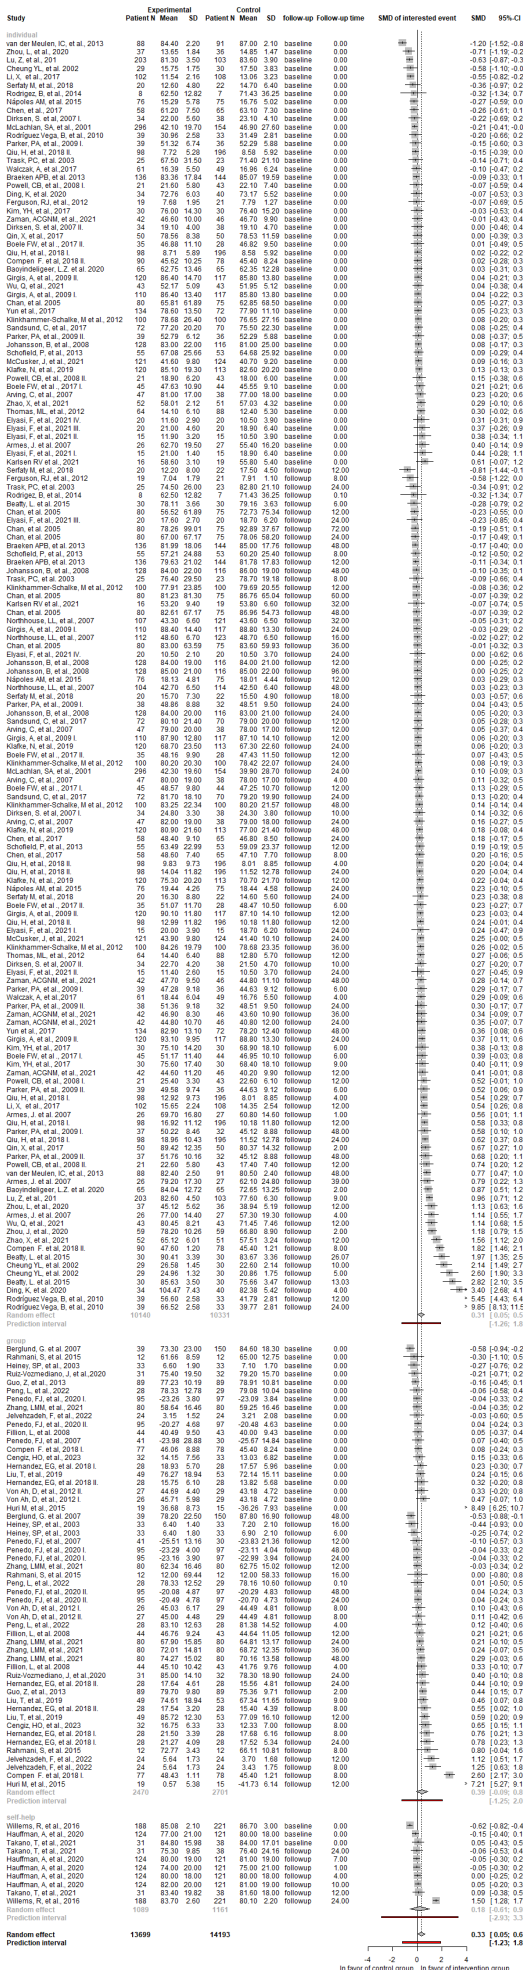

Figure S20.2.T12

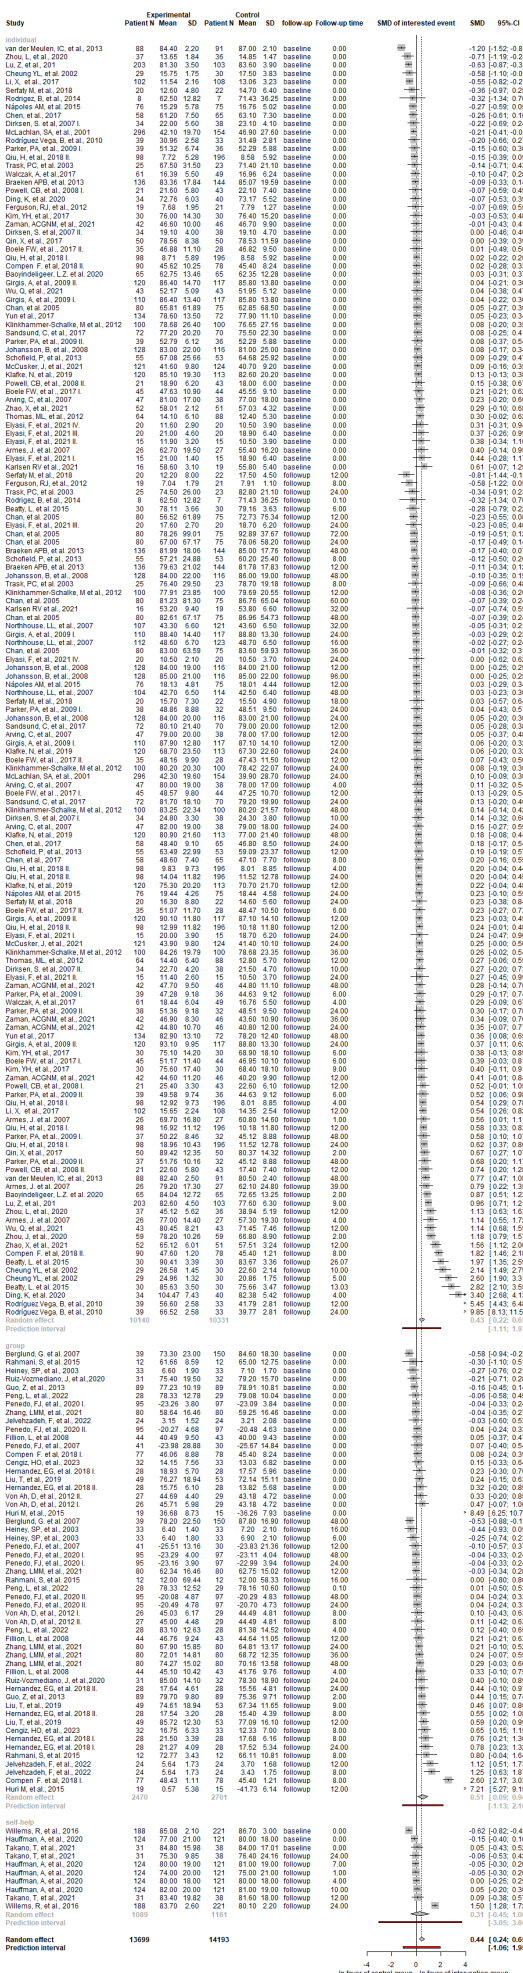

Figure S20.3.T24

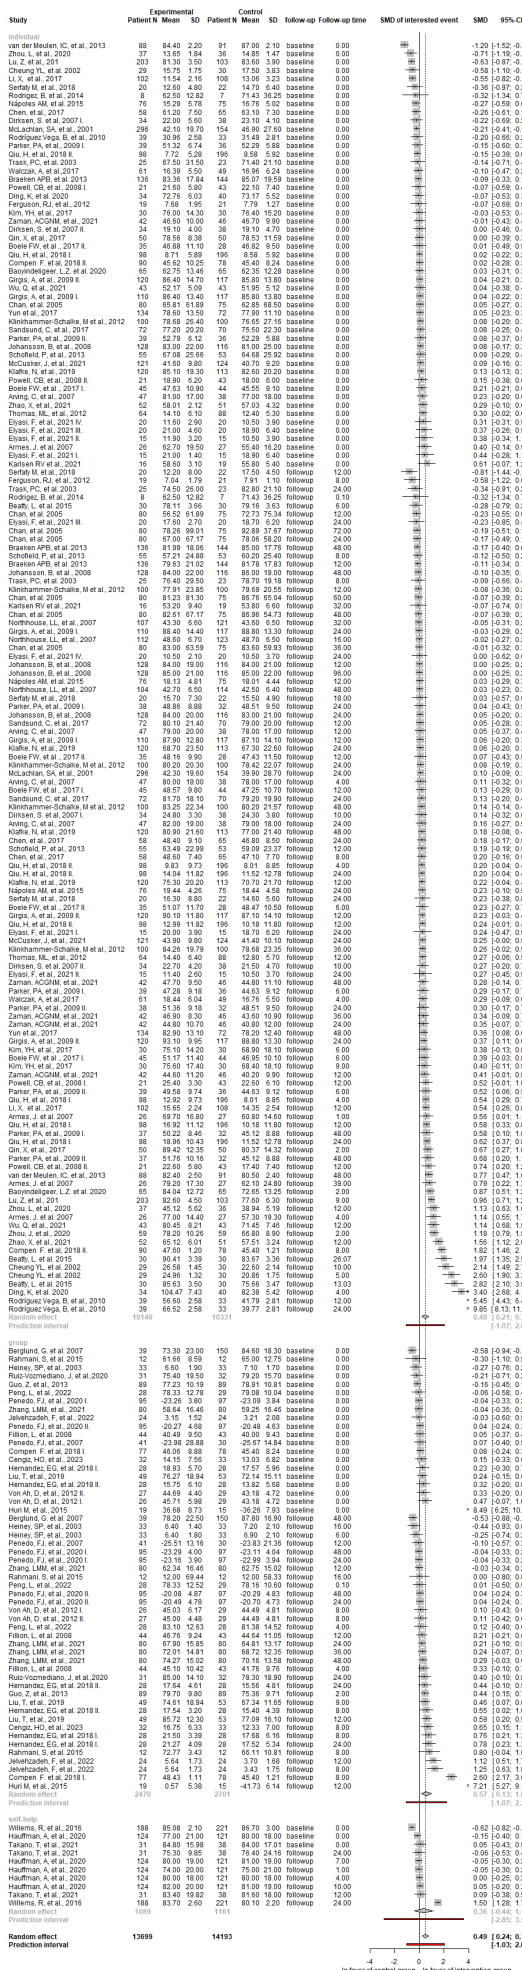

Figure S20.4.T48

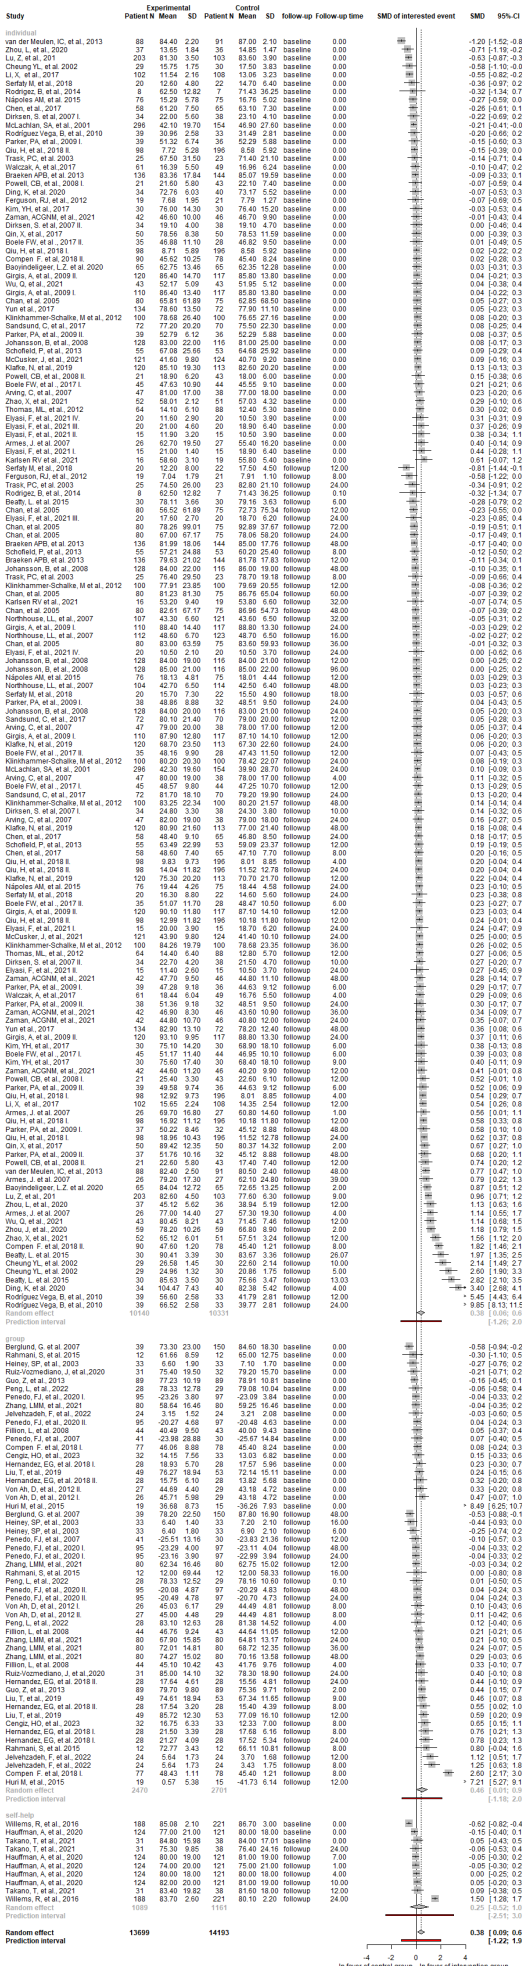

## S21. Subgroup analysis of Physical QoL: Cancer stage

Figure S21.1.T0

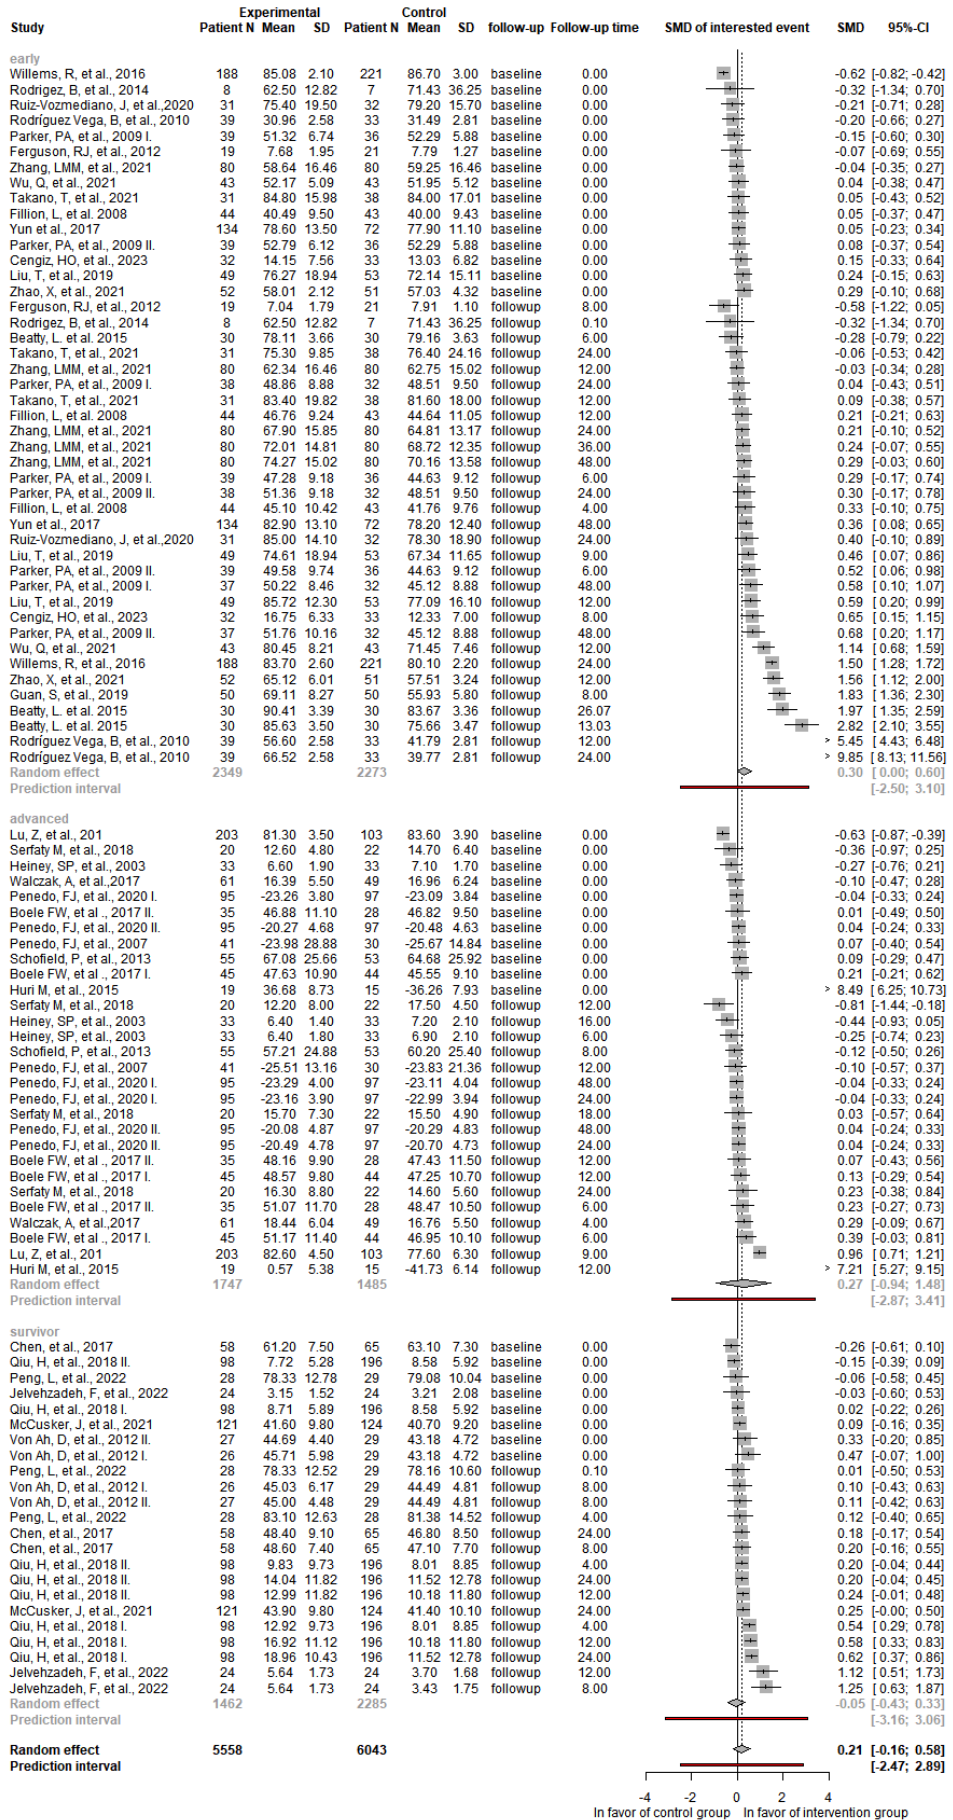

Figure S21.1. Forest plot represents the difference between the intervention vs. control group in the Physical QoL domain with the cancer stage subgroups as predicted at week 0 (post-intervention). SMD - Standardized mean difference, CI - confidence interval.

Figure S21.2.T12

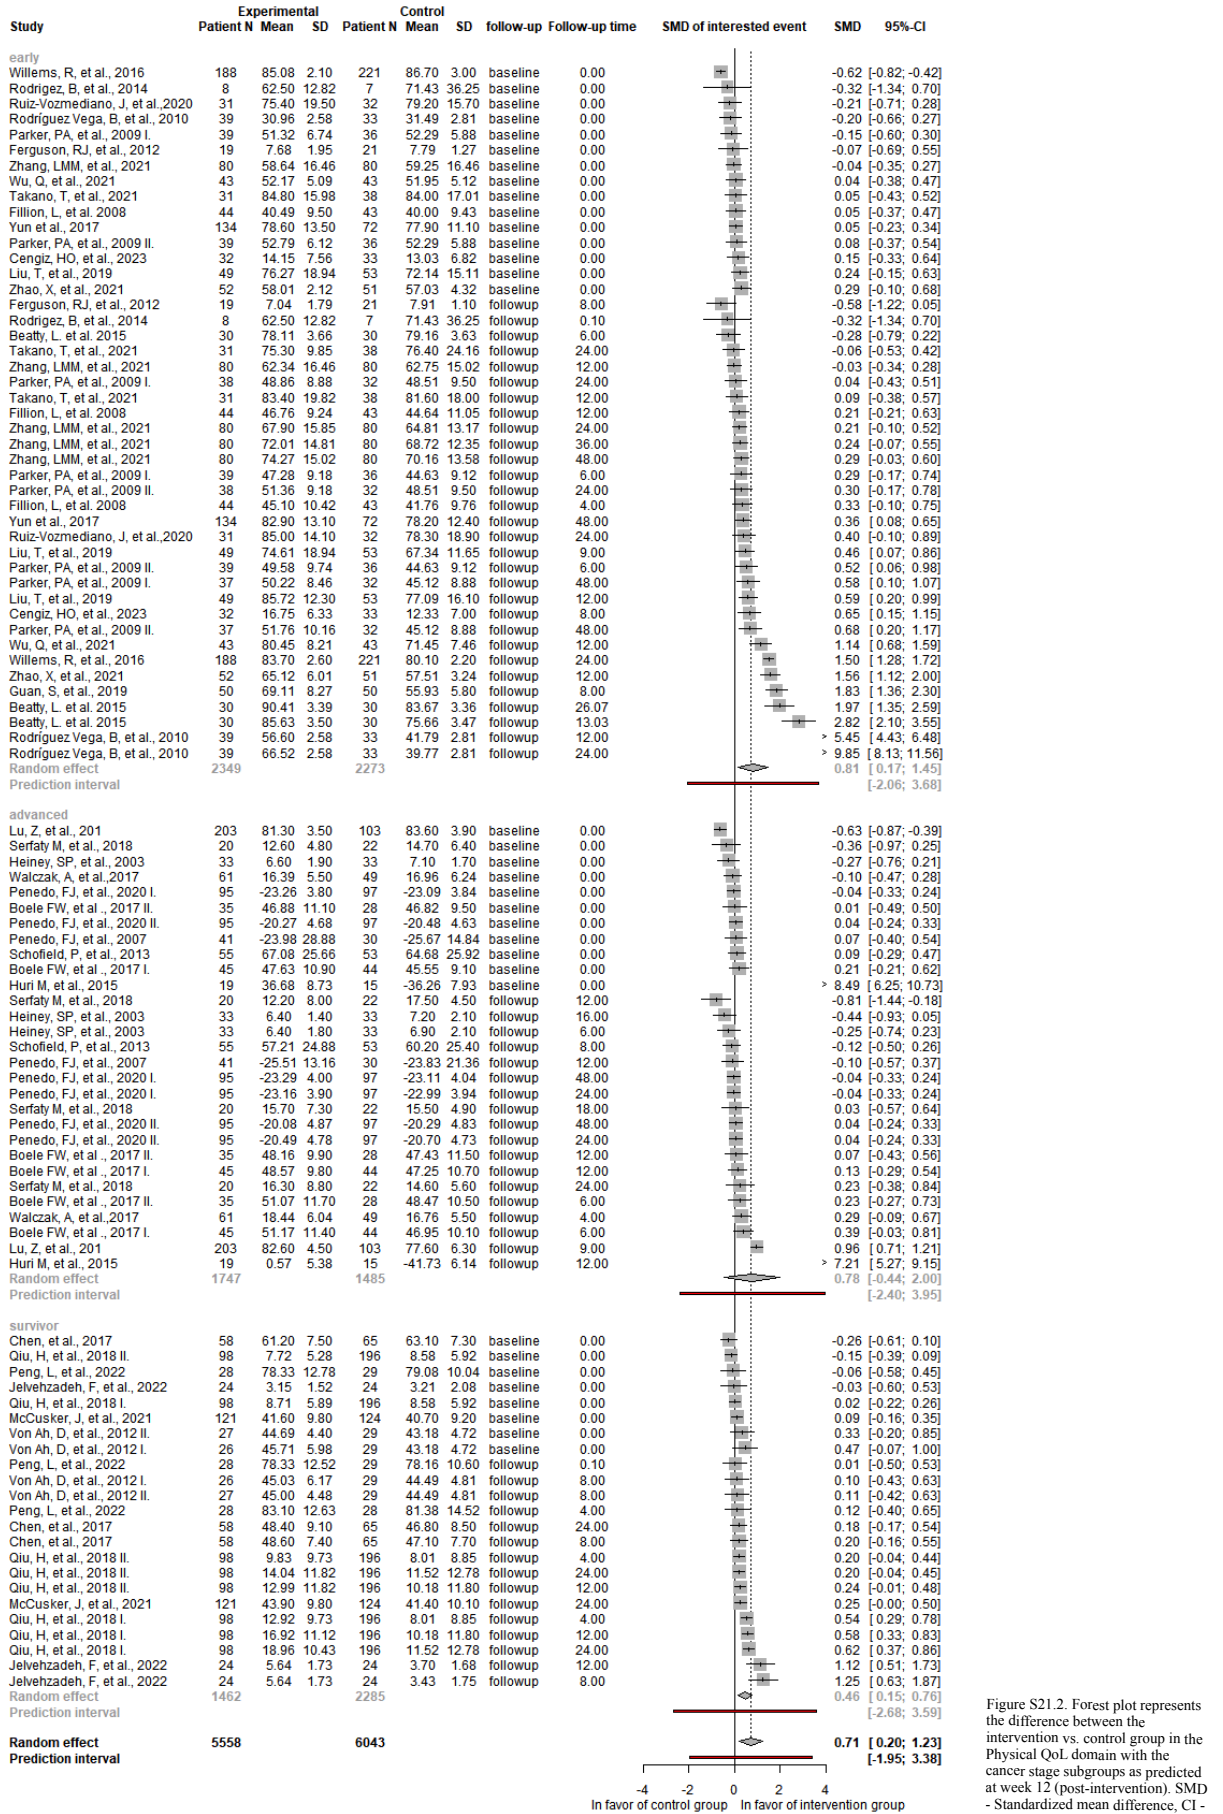

Figure S21.3.T24

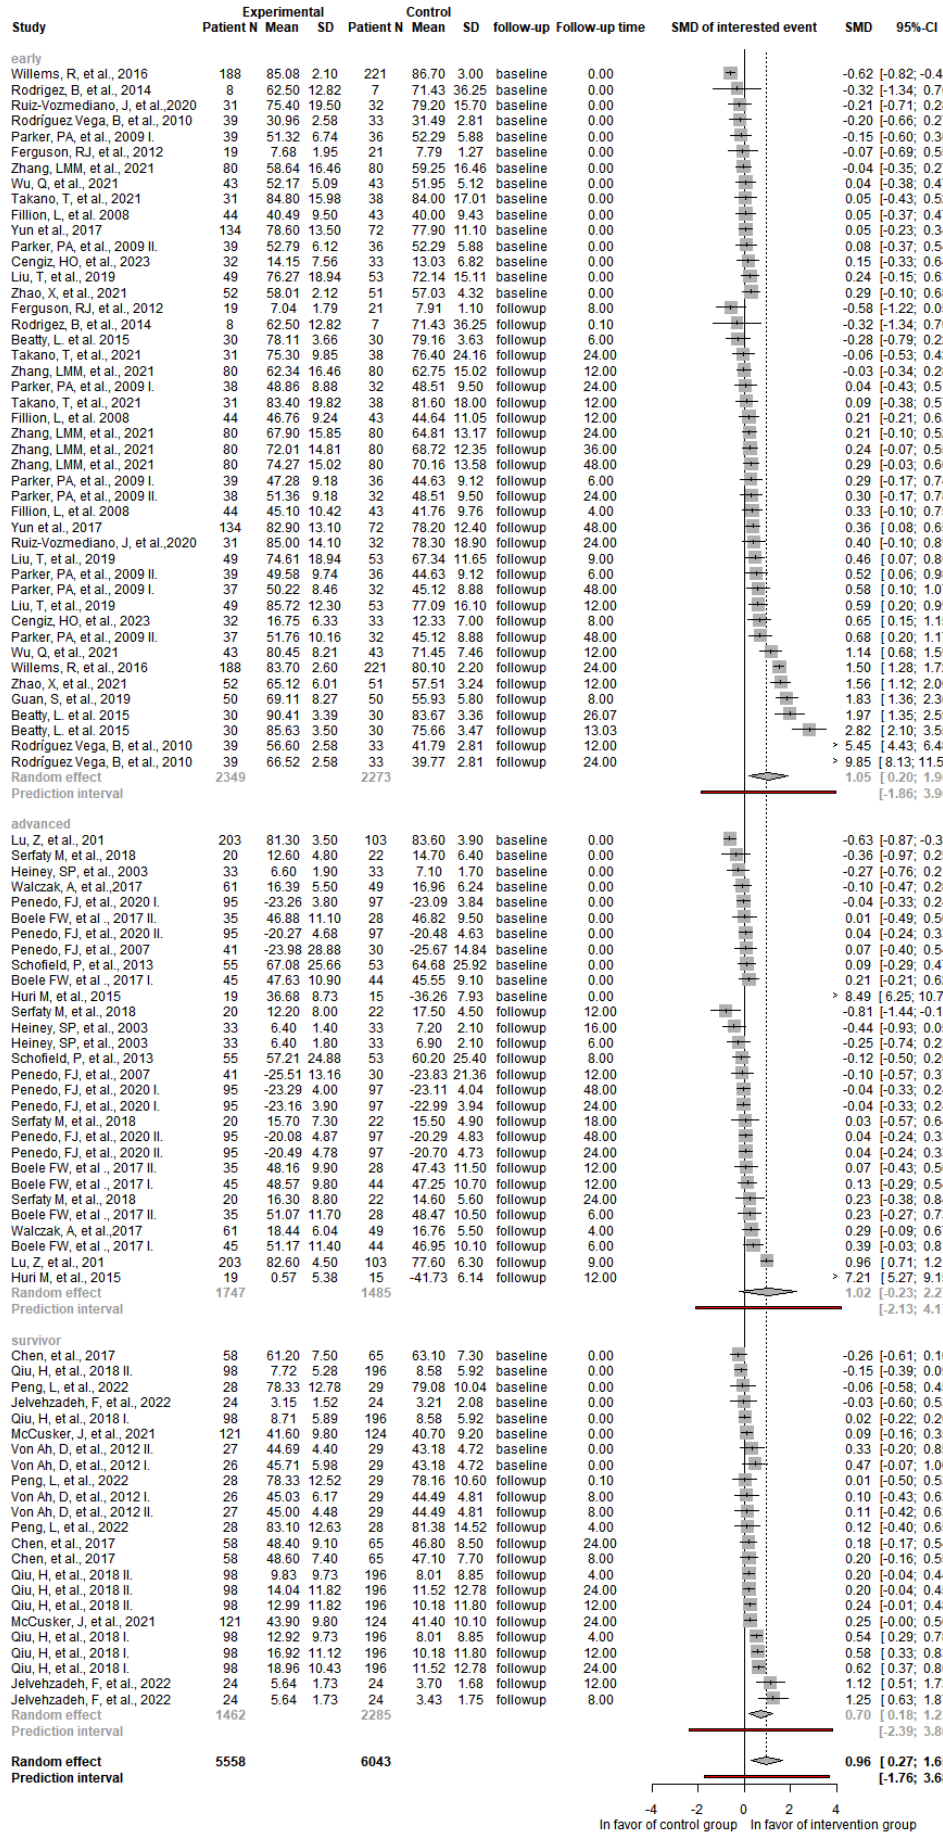



Figure S21.4.T48

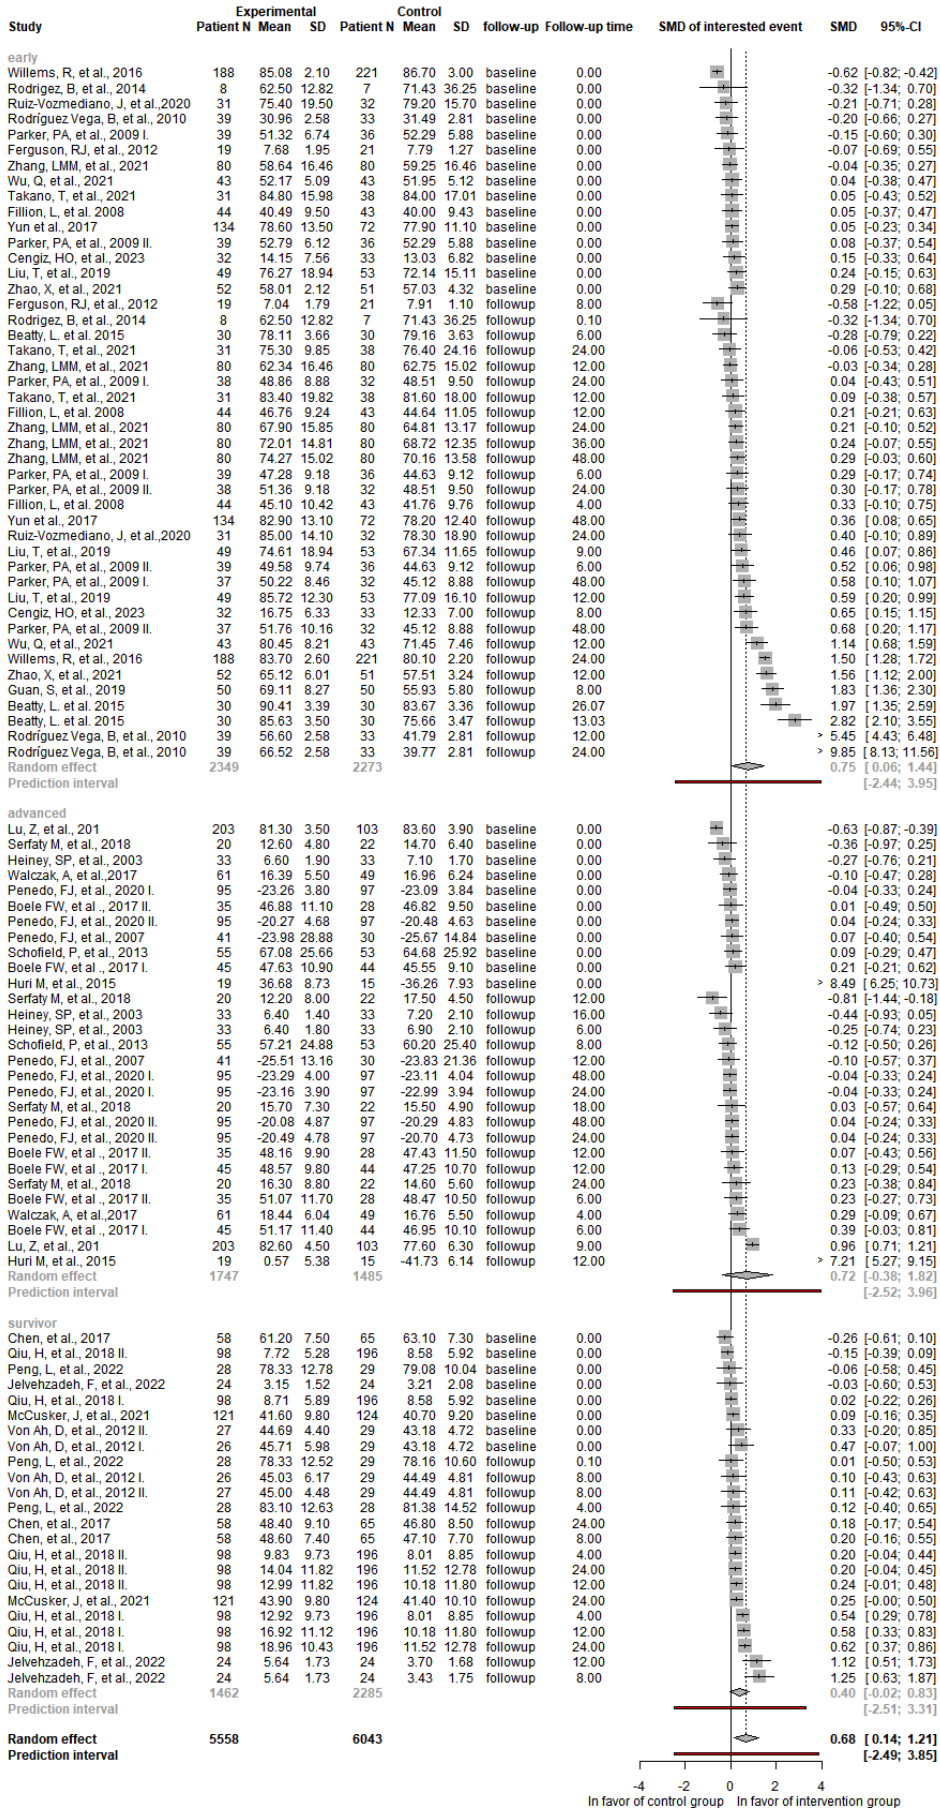

## S22.Subgroup analysis of Physical QoL: Cancer type

Figure S22.1.T0

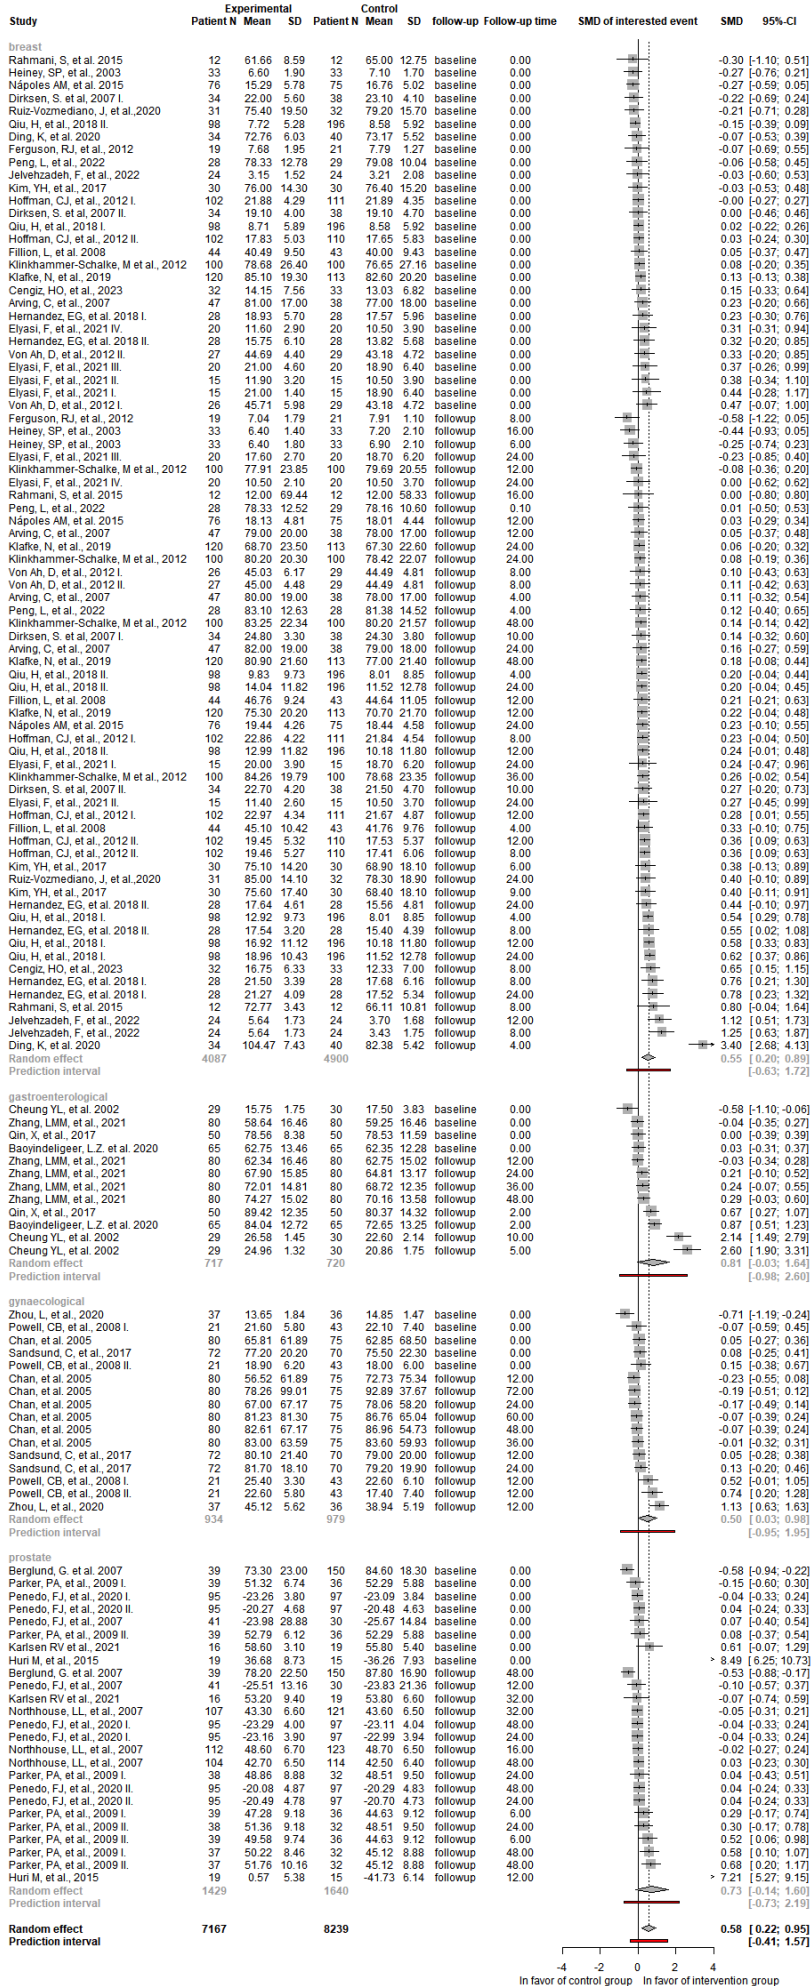

Figure S22.2.T12

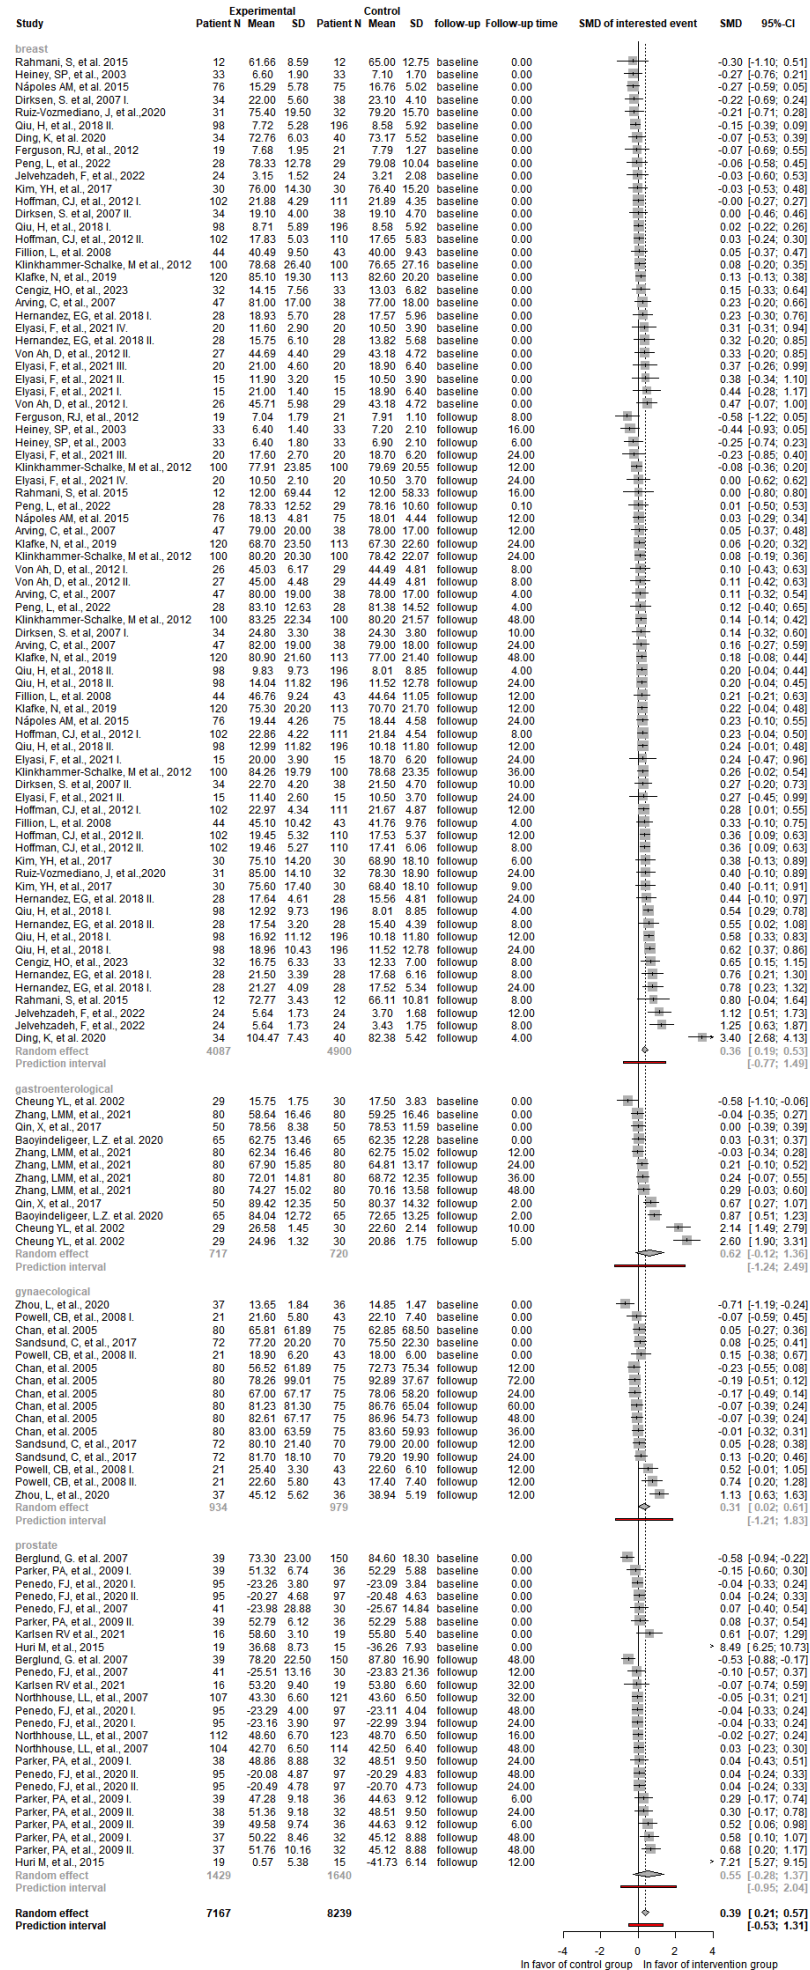

Figure S22.3.T24

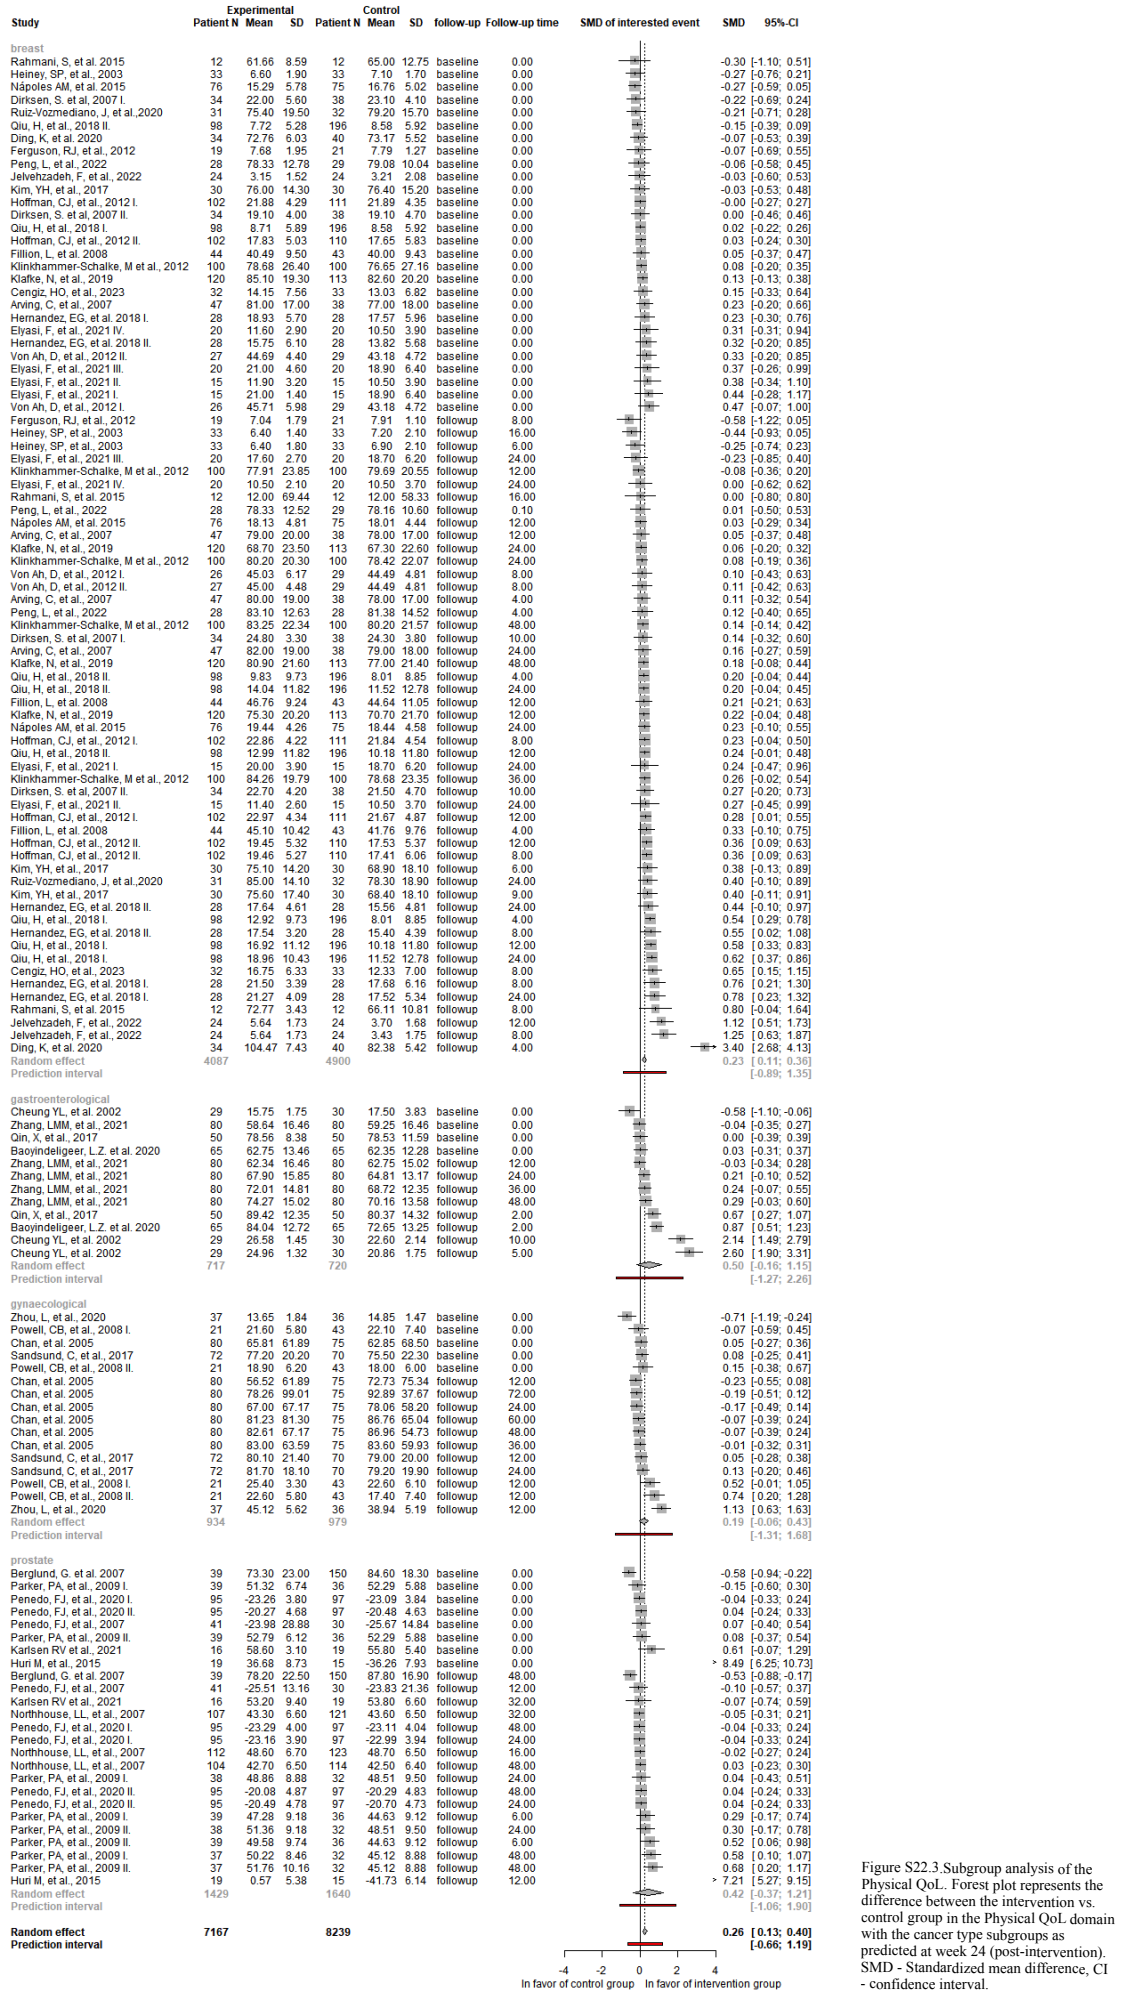

Figure S22.4.T48

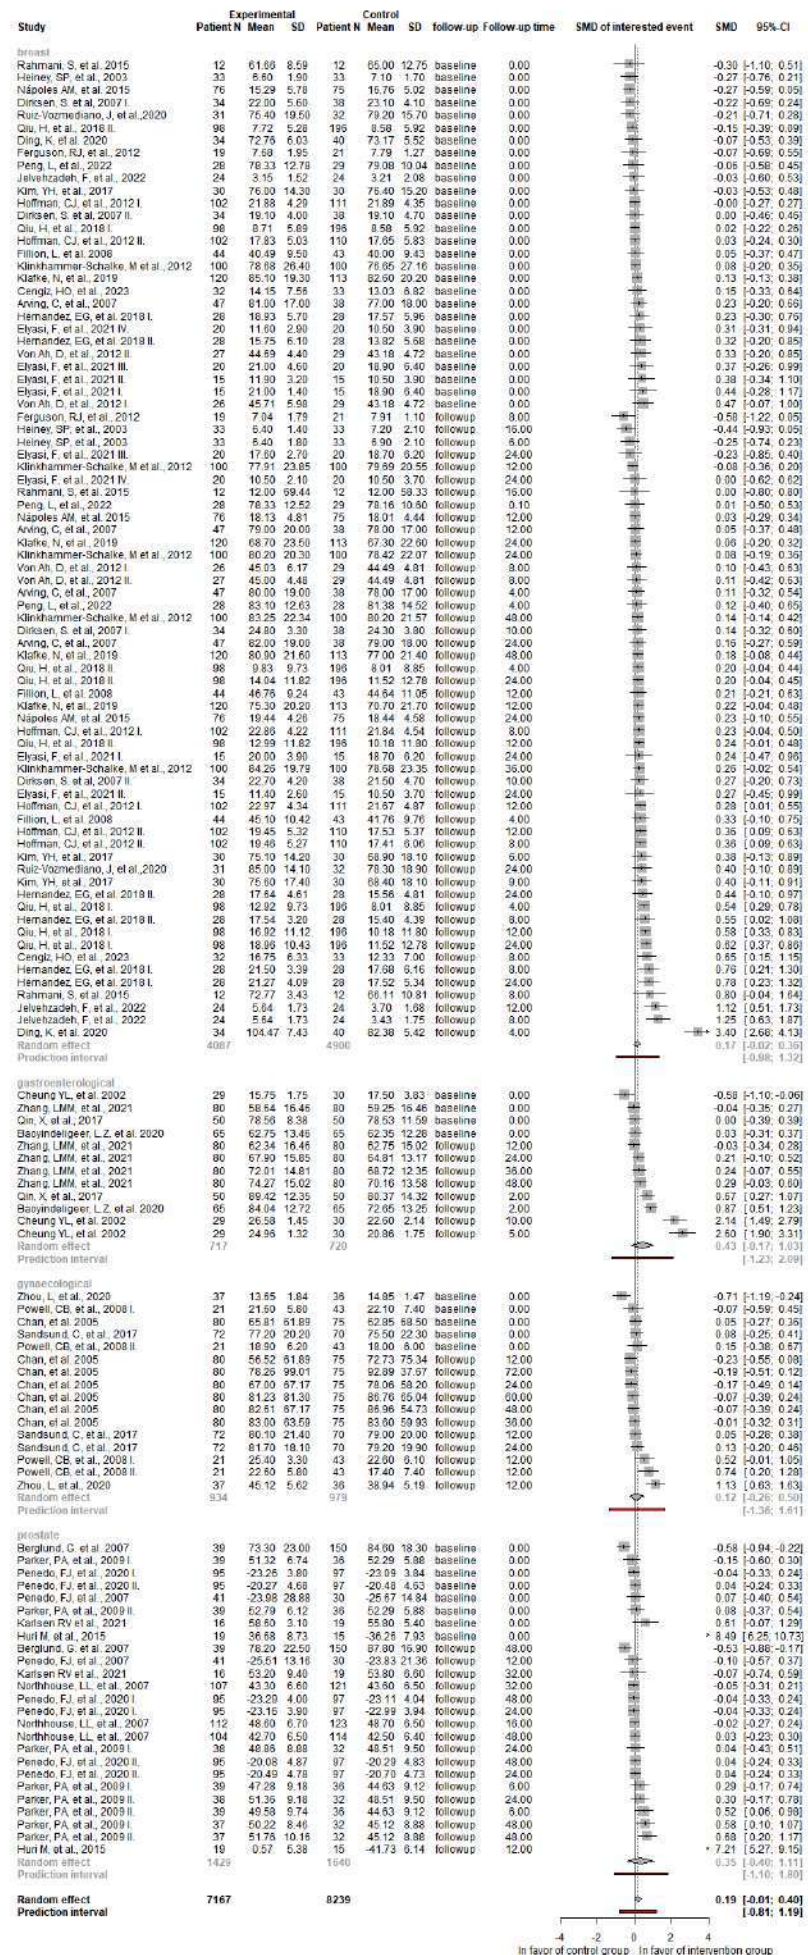

## S23. Table S.3. Risk of bias assessment

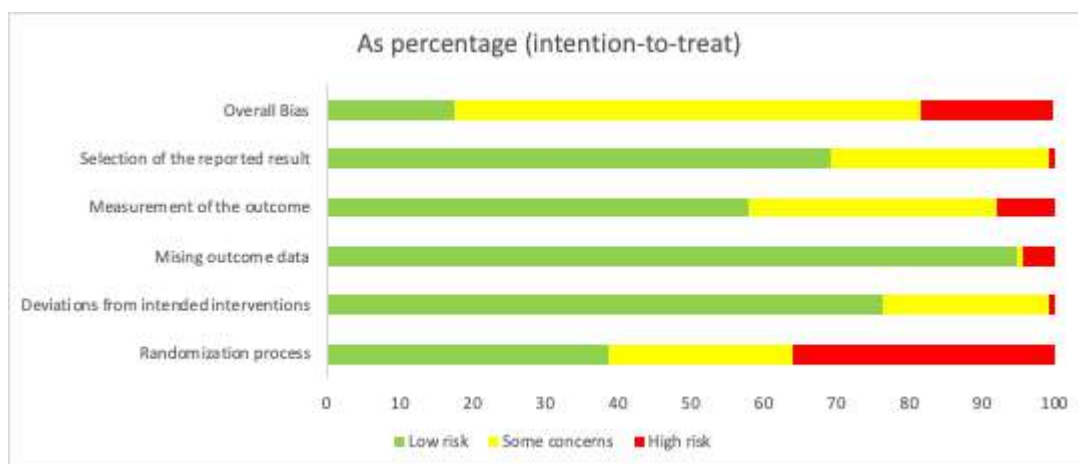

| Study ID               | Experimental  | Comparator | Outcome             | Weight | Randomization process | Deviations from intended inter | Missing outcome data | Measurement of the outcome | Selection of the reported result | Overall |
|------------------------|---------------|------------|---------------------|--------|-----------------------|--------------------------------|----------------------|----------------------------|----------------------------------|---------|
| Antoni et al. 2006     | psychological | usual care | quality of life     | 1      | +                     | +                              | +                    | +                          | ?                                | !       |
| Aranda et al. 2006     | psychological | usual care | quality of life     | 1      | ?                     | +                              | +                    | +                          | ?                                | !       |
| Armes et al. 2007      | psychological | usual care | quality of life     | 1      | +                     | +                              | +                    | +                          | ?                                | !       |
| Arving et al. 2007     | psychological | usual care | quality of life     | 1      | ?                     | +                              | +                    | +                          | ?                                | !       |
| Ashing et al. 2019     | psychological | usual care | quality of life     | 1      | +                     | +                              | +                    | +                          | ?                                | !       |
| Baoyindeigeer et al.   | psychological | usual care | quality of life     | 1      | ?                     | ?                              | +                    | +                          | ?                                | !       |
| Beatty et al. 2015     | psychological | usual care | quality of life     | 1      | +                     | ?                              | +                    | +                          | ?                                | !       |
| Besty et al. 2015      | psychological | usual care | quality of life     | 1      | ?                     | +                              | +                    | +                          | ?                                | !       |
| Berglund et al. 2007   | psychological | usual care | quality of life     | 1      | !                     | +                              | +                    | +                          | ?                                | !       |
| Boele et al. 2017      | psychological | usual care | quality of life     | 1      | !                     | +                              | +                    | +                          | ?                                | !       |
| Boesen et al. 2007     | psychological | usual care | recurrence free sur | 1      | +                     | +                              | +                    | +                          | ?                                | !       |
| Braeken et al. 2013    | psychological | usual care | quality of life     | 1      | ?                     | +                              | +                    | ?                          | ?                                | !       |
| Breitbart et al. 2018  | psychological | usual care | quality of life     | 1      | +                     | +                              | +                    | !                          | ?                                | !       |
| Chan et al. 2005       | psychological | usual care | quality of life     | 1      | +                     | +                              | +                    | +                          | ?                                | !       |
| Chen et al. 2017       | psychological | usual care | quality of life     | 1      | +                     | +                              | +                    | +                          | ?                                | !       |
| Cheung et al. 2002     | psychological | usual care | quality of life     | 1      | ?                     | +                              | +                    | !                          | ?                                | !       |
| Chu et al. 2020        | psychological | usual care | quality of life     | 1      | +                     | ?                              | ?                    | ?                          | +                                | !       |
| Compen et al. 2018     | psychological | usual care | quality of life     | 1      | +                     | +                              | +                    | +                          | +                                | !       |
| Dieng et al. 2020      | psychological | usual care | quality of life     | 1      | +                     | +                              | +                    | +                          | ?                                | !       |
| Ding et al. 2020       | psychological | usual care | quality of life     | 1      | +                     | +                              | +                    | ?                          | ?                                | !       |
| Dirksen et al. 2007    | psychological | usual care | quality of life     | 1      | !                     | +                              | +                    | +                          | ?                                | !       |
| Dolbeault et al. 2008  | psychological | usual care | quality of life     | 1      | ?                     | +                              | +                    | +                          | ?                                | !       |
| Dos santos et al. 2021 | psychological | usual care | quality of life     | 1      | +                     | +                              | +                    | +                          | +                                | !       |
| Edmondset al. 1999     | psychological | usual care | quality of life     | 1      | !                     | !                              | +                    | ?                          | +                                | !       |
| Eyasi et al. 2021      | psychological | usual care | quality of life     | 1      | !                     | ?                              | +                    | ?                          | ?                                | !       |
| Esplen et al. 2018     | psychological | usual care | quality of life     | 1      | ?                     | +                              | +                    | +                          | ?                                | !       |
| Fang et al. 2020       | psychological | usual care | quality of life     | 1      | ?                     | ?                              | +                    | ?                          | +                                | !       |
| Fann et al. 2009       | psychological | usual care | quality of life     | 1      | ?                     | +                              | +                    | +                          | ?                                | !       |
| Ferguson et al. 2012   | psychological | usual care | quality of life     | 1      | !                     | +                              | +                    | ?                          | +                                | !       |
| Fillion et al. 2008    | psychological | usual care | quality of life     | 1      | +                     | +                              | +                    | +                          | ?                                | !       |
| Gao et al. 2020        | psychological | usual care | quality of life     | 1      | +                     | +                              | +                    | +                          | ?                                | !       |
| Garssen et al. 2012    | psychological | usual care | quality of life     | 1      | ?                     | ?                              | +                    | ?                          | ?                                | !       |
| Gaston-Johansson et    | psychological | usual care | quality of life     | 1      | !                     | +                              | +                    | +                          | ?                                | !       |
| Giesler et al. 2005    | psychological | usual care | quality of life     | 1      | +                     | +                              | +                    | +                          | +                                | !       |
| Girgis et al. 2009     | psychological | usual care | quality of life     | 1      | !                     | +                              | +                    | !                          | +                                | !       |
| Guan et al. 2019       | psychological | usual care | quality of life     | 1      | !                     | +                              | +                    | ?                          | +                                | !       |
| Guan et al. 2019       | psychological | usual care | recurrence free sur | 1      | !                     | +                              | +                    | +                          | +                                | !       |
| Guo et al. 2013        | psychological | usual care | quality of life     | 1      | !                     | +                              | +                    | ?                          | +                                | !       |
| Guo et al. 2013        | psychological | usual care | overall survival    | 1      | !                     | +                              | +                    | +                          | +                                | !       |
| Guo et al. 2013        | psychological | usual care | recurrence free sur | 1      | !                     | +                              | +                    | +                          | +                                | !       |
| Hall et al. 2011       | psychological | usual care | quality of life     | 1      | +                     | +                              | +                    | +                          | ?                                | !       |
| Ham et al. 2019        | psychological | usual care | quality of life     | 1      | +                     | +                              | +                    | +                          | ?                                | !       |
| Huffman et al. 2020    | psychological | usual care | quality of life     | 1      | !                     | +                              | !                    | !                          | ?                                | !       |
| Hawkes et al. 2014     | psychological | usual care | quality of life     | 1      | +                     | +                              | +                    | +                          | +                                | !       |

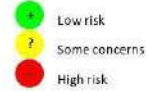



|                        |                                |                  |   |   |   |   |   |   |   |   |
|------------------------|--------------------------------|------------------|---|---|---|---|---|---|---|---|
| Haney et al. 2003      | psychological inter usual care | quality of life  | 1 | ? | + | + | + | - | + | - |
| Henderson et al. 201   | psychological outc usual care  | quality of life  | 1 | - | + | + | + | ? | ? | - |
| Hoffman et al. 2012    | psychological inter usual care | quality of life  | 1 | - | + | + | + | - | + | - |
| Hun et al. 2015        | psychological inter usual care | quality of life  | 1 | + | + | + | + | + | + | - |
| Jelvehzadeh et al. 20  | psychological inter usual care | quality of life  | 1 | - | + | + | + | ? | + | ! |
| Jelvehzadeh et al. 20  | psychological inter usual care | quality of life  | 1 | - | + | + | + | ? | + | - |
| Johansson et al. 200   | psychological inter usual care | quality of life  | 1 | - | + | + | + | ? | + | - |
| Karlsen et al. 2021    | psychological inter usual care | quality of life  | 1 | + | + | + | + | + | + | - |
| Kim et al. 2017        | psychological inter usual care | quality of life  | 1 | - | + | + | + | ? | + | ! |
| Klafke et al. 2019     | psychological inter usual care | quality of life  | 1 | ? | + | + | + | ? | + | ! |
| Klinkhammer-Schalck    | psychological inter usual care | quality of life  | 1 | + | + | + | + | + | + | - |
| Lee et al. 2018        | psychological inter usual care | quality of life  | 1 | ? | + | + | + | ? | + | ! |
| Li et al. 2019         | psychological inter usual care | quality of life  | 1 | - | + | + | + | ? | ? | - |
| Liu et al. 2019        | psychological inter usual care | quality of life  | 1 | + | + | + | + | + | + | - |
| Lutgendorf et al. 201  | psychological care usual care  | quality of life  | 1 | - | + | + | + | + | + | ! |
| Marchioro et al. 199   | psychological inter usual care | quality of life  | 1 | ? | + | + | + | + | + | ! |
| McCaughan et al. 20    | psychological inter usual care | quality of life  | 1 | + | + | + | + | ? | + | ! |
| McLachlan et al. 200   | psychological inter usual care | quality of life  | 1 | ? | + | + | + | ? | + | ! |
| Miaskowski et al. 201  | psychological care usual care  | quality of life  | 1 | + | + | + | + | - | - | - |
| Mihuta et al. 2018     | psychological inter usual care | quality of life  | 1 | ? | ? | + | + | ? | + | ! |
| Nápoles et al. 2015    | psychological inter usual care | quality of life  | 1 | + | + | + | + | + | + | - |
| Nikbakhtsh et al. 201  | psychological inter usual care | quality of life  | 1 | ? | ? | + | + | ? | ? | ! |
| Northouse et al. 200   | psychological inter usual care | quality of life  | 1 | - | + | + | + | + | + | ! |
| Parker et al. 2009     | psychological inter usual care | quality of life  | 1 | + | ? | + | + | ? | + | ! |
| Penedo et al. 2007     | psychological inter usual care | quality of life  | 1 | + | + | + | + | + | ? | ! |
| Penedo et al. 2020     | psychological inter usual care | quality of life  | 1 | + | + | + | + | + | + | - |
| Peoples et al. 2017    | psychological inter usual care | quality of life  | 1 | + | + | + | + | + | + | - |
| Petersen et al. 2002   | psychological inter usual care | quality of life  | 1 | + | ? | + | + | + | + | ! |
| Powell et al. 2008     | psychological inter usual care | quality of life  | 1 | - | ? | + | + | ? | + | ! |
| Rahmani et al. 2015    | psychological inter usual care | quality of life  | 1 | - | + | + | + | ? | + | ! |
| Reese et al. 2021      | psychological inter usual care | quality of life  | 1 | - | ? | + | + | ? | + | ! |
| Reich et al. 2016      | psychological inter usual care | quality of life  | 1 | - | + | + | + | ? | + | ! |
| Rodin et al. 2019      | psychological inter usual care | quality of life  | 1 | + | ? | + | + | ? | + | ! |
| Rodriguez et al. 2014  | psychological inter usual care | quality of life  | 1 | ? | ? | + | + | ? | + | ! |
| Rosen et al. 2018      | psychological inter usual care | quality of life  | 1 | - | + | + | + | + | + | ! |
| Rutz-Vozmediano et     | psychological inter usual care | quality of life  | 1 | - | + | + | + | + | + | ! |
| Sandsund et al. 2016   | psychological inter usual care | quality of life  | 1 | + | ? | + | + | + | + | ! |
| Savard et al. 2006     | psychological inter usual care | quality of life  | 1 | - | + | + | + | ? | + | - |
| Schellekens et al. 20  | psychological inter usual care | quality of life  | 1 | - | + | + | + | ? | + | ! |
| Schofield et al. 2016  | psychological inter usual care | quality of life  | 1 | - | + | + | + | ? | + | ! |
| Serfaty et al. 2015    | psychological inter usual care | quality of life  | 1 | - | + | + | + | + | + | ! |
| Takano et al. 2021     | psychological inter usual care | quality of life  | 1 | ? | + | + | + | + | + | ! |
| Takano et al. 2021     | psychological inter usual care | overall survival | 1 | ? | + | + | + | + | + | ! |
| Thomas et al. 2012     | psychological inter usual care | quality of life  | 1 | + | + | + | + | + | + | - |
| Trask et al. 2003      | psychological inter usual care | quality of life  | 1 | + | + | + | + | ? | + | ! |
| Turner et al. 2016     | psychological inter usual care | quality of life  | 1 | - | ? | + | + | ? | + | ! |
| van de Wal et al. 201  | psychological inter usual care | quality of life  | 1 | + | + | + | + | + | + | - |
| van den Berg et al. 20 | psychological inter usual care | quality of life  | 1 | - | + | + | + | + | + | - |
| Van Der Hout et al. 2  | psychological inter usual care | quality of life  | 1 | + | + | + | + | ? | + | ! |
| Van der Meulen et al   | psychological inter usual care | quality of life  | 1 | ? | + | + | + | ? | + | ! |

|                       |                               |                     |   |   |   |   |   |   |   |
|-----------------------|-------------------------------|---------------------|---|---|---|---|---|---|---|
| Vanbutselē et al. 201 | psychological interusual care | overall survival    | 1 | ? | + | - | + | + | - |
| Vanbutselē et al. 201 | psychological interusual care | quality of life     | 1 | ? | + | - | + | + | - |
| Von Ah et al. 2012    | psychological interusual care | quality of life     | 1 | - | ? | + | + | + | ! |
| Walczak et al. 2017   | psychological interusual care | quality of life     | 1 | + | + | + | + | + | + |
| Walker et al. 1999    | psychological interusual care | quality of life     | 1 | ? | + | + | + | + | ! |
| Walker et al. 2014    | psychological interusual care | quality of life     | 1 | + | + | + | + | + | + |
| Wang et al. 2019      | psychological interusual care | quality of life     | 1 | ? | + | + | ? | + | ! |
| Wang et al. 2019      | psychological interusual care | overall survival    | 1 | ? | + | - | ? | + | - |
| Willems et al. 2016   | psychological interusual care | quality of life     | 1 | - | ? | + | ? | + | ! |
| Wu et al. 2016        | psychological interusual care | quality of life     | 1 | ? | + | - | - | ? | - |
| Wu et al. 2021        | psychological interusual care | quality of life     | 1 | - | ? | + | ? | + | ! |
| Yoo et al. 2005       | psychological interusual care | quality of life     | 1 | ? | + | + | + | + | ! |
| Yun et al. 2017       | psychological interusual care | quality of life     | 1 | - | ? | + | ? | ? | ! |
| Zhang et al. 2021     | psychological interusual care | quality of life     | 1 | + | ? | + | + | + | ! |
| Zhang et al. 2021     | psychological interusual care | overall survival    | 1 | + | ? | + | + | + | ! |
| Zhang et al. 2021     | psychological interusual care | quality of life     | 1 | + | + | + | + | + | + |
| Zhang et al. 2021     | psychological interusual care | recurrence free sur | 1 | + | + | + | + | + | + |
| Zhao et al. 2021      | psychological interusual care | quality of life     | 1 | - | ? | + | ? | ? | ! |
| Zhao et al., 2015     | psychological interusual care | quality of life     | 1 | - | ? | + | ? | ? | ! |
| Zhou et al. 2020      | psychological interusual care | quality of life     | 1 | + | ? | + | - | + | - |
| Anderson et al. 2006  | psychological interusual care | quality of life     | 1 | ? | + | + | + | ? | ! |
| Björneklett et al. 20 | psychological interusual care | quality of life     | 1 | + | + | + | + | ? | ! |
| Børøsd et al. 2020    | psychological interusual care | quality of life     | 1 | + | + | + | + | + | + |
| Carbajal-López et al. | psychological interusual care | quality of life     | 1 | + | ? | + | ? | ? | ! |
| Rahmani et al. 2014   | psychological interusual care | quality of life     | 1 | - | + | + | ? | + | ! |
| Carlson et al. 2013   | psychological interusual care | quality of life     | 1 | + | + | + | + | + | + |
| Bl et al. 2008        | psychological interusual care | quality of life     | 1 | - | ? | + | ? | + | ! |
| Lapid et al. 2007     | psychological interusual care | quality of life     | 1 | ? | + | + | + | + | ! |
| Lu et al. 2017        | psychological interusual care | quality of life     | 1 | - | + | + | ? | + | + |
| Murphy et al. 2019    | psychological interusual care | quality of life     | 1 | - | + | + | ? | + | ! |
| Pettiford et al. 2017 | psychological interusual care | quality of life     | 1 | - | ? | + | + | ? | ! |
| Poort et al. 2020     | psychological interusual care | quality of life     | 1 | + | + | + | + | + | + |
| Ramirez et al. 2019   | psychological interusual care | quality of life     | 1 | + | + | + | + | ? | ! |
| Rottmann et al. 201   | psychological interusual care | quality of life     | 1 | - | + | + | + | + | - |
| Sharpe et al. 2014    | psychological interusual care | quality of life     | 1 | - | + | + | ? | + | ! |
| Sohl et al. 2017      | psychological interusual care | quality of life     | 1 | - | + | + | ? | + | ! |
| Van Amstel et al. 201 | psychological interusual care | quality of life     | 1 | - | ? | + | ? | + | ! |
| Yanez et al. 2015     | psychological interusual care | quality of life     | 1 | + | ? | + | ? | + | ! |

## S24. Publication bias

Figure S24.1. Overall Survival

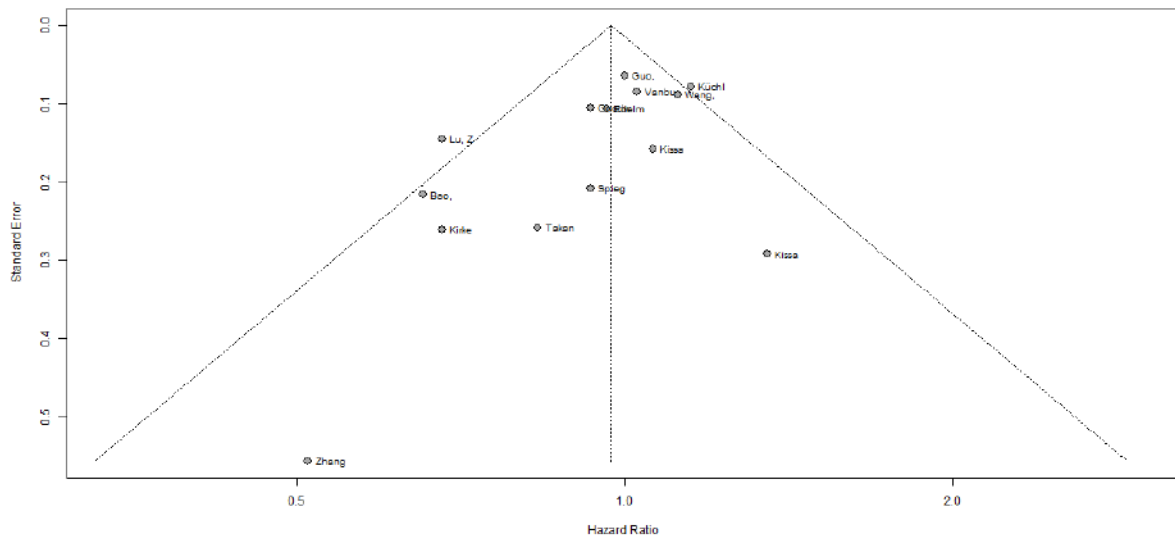

Figure S24.1. Funnel plot for OS outcome showing possible publication bias (Egger's test p-value is 0.0524).

Figure S4.2. Recurrence-free Survival

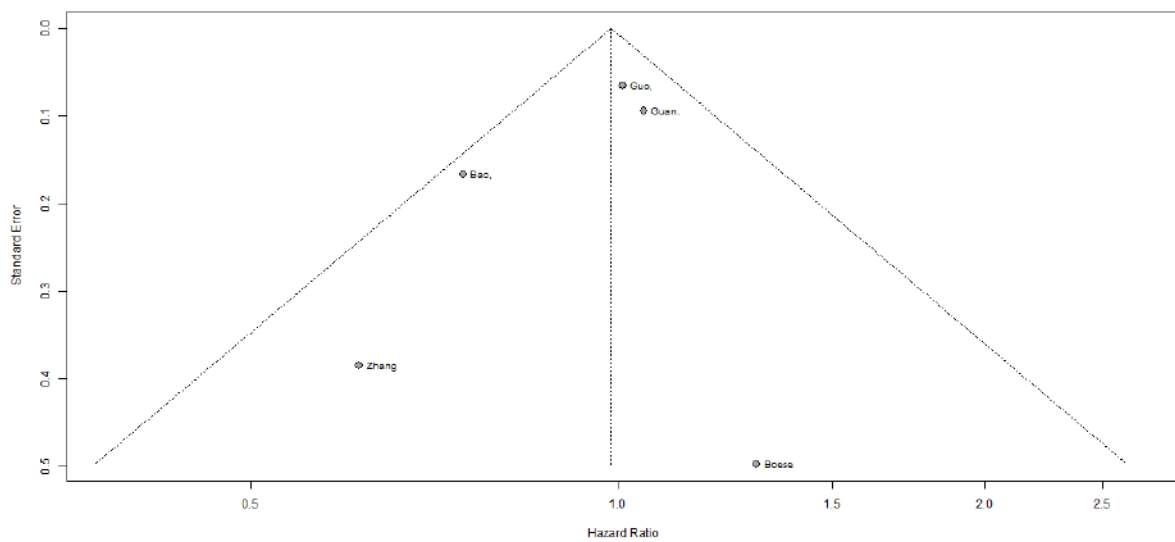

Figure S24.2. Funnel plot for RFS outcome showing no publication bias (Egger's test p-value is 0.4226).

## S24.3.Global QoI

Figure S24.3.1.Provider

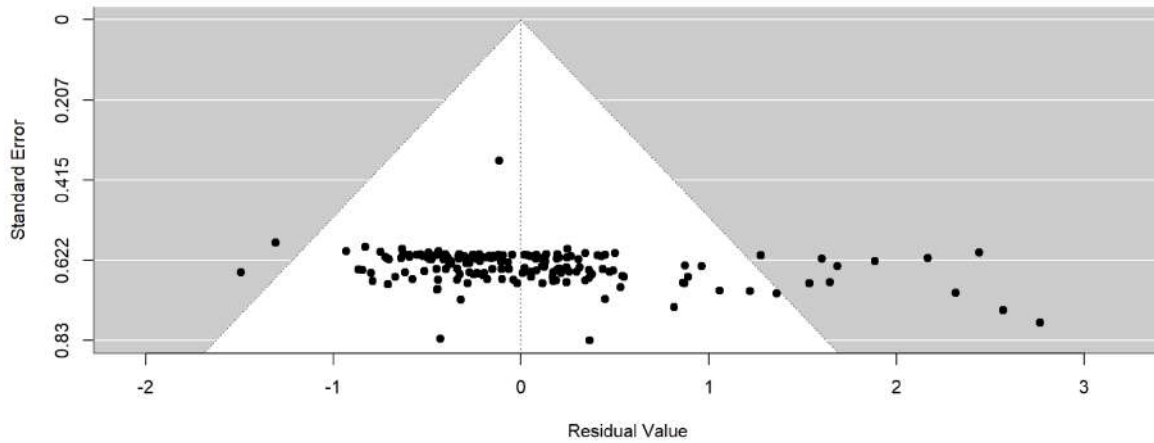

Figure S24.3.1.Funnel plot for Global QoI provider subgroup showing possible publication bias.

Figure S24.3.2.Environment

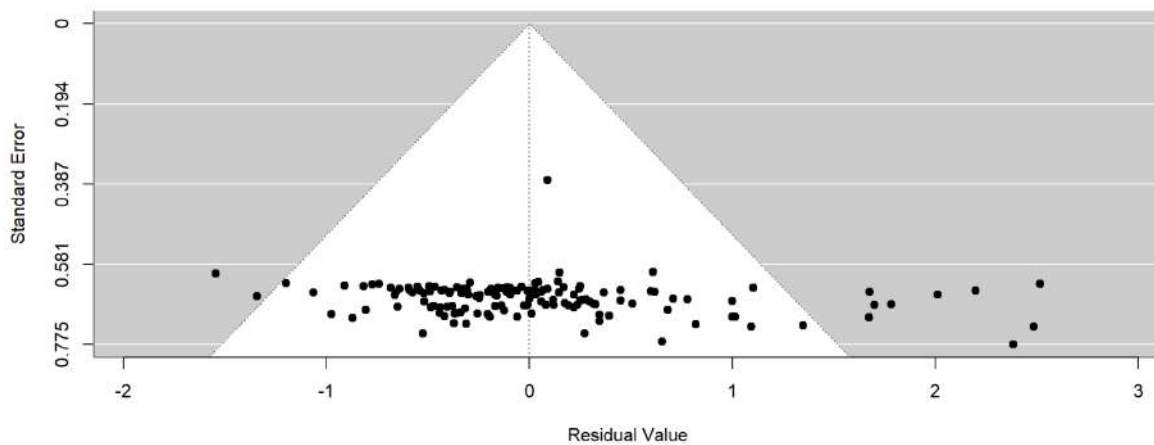

Figure S24.2 .Funnel plot for Global QoI environment subgroup showing possible publication bias.

Figure S24.3.3.Type

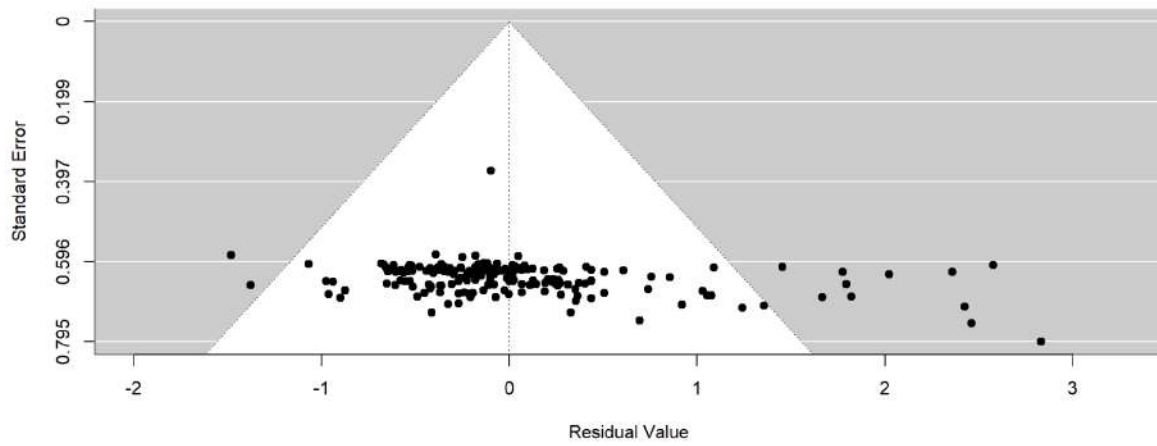

Figure S24.3.3.Funnel plot for Global QoL type subgroup showing possible publication bias.

Figure S24.3.4.Duration of Intervention

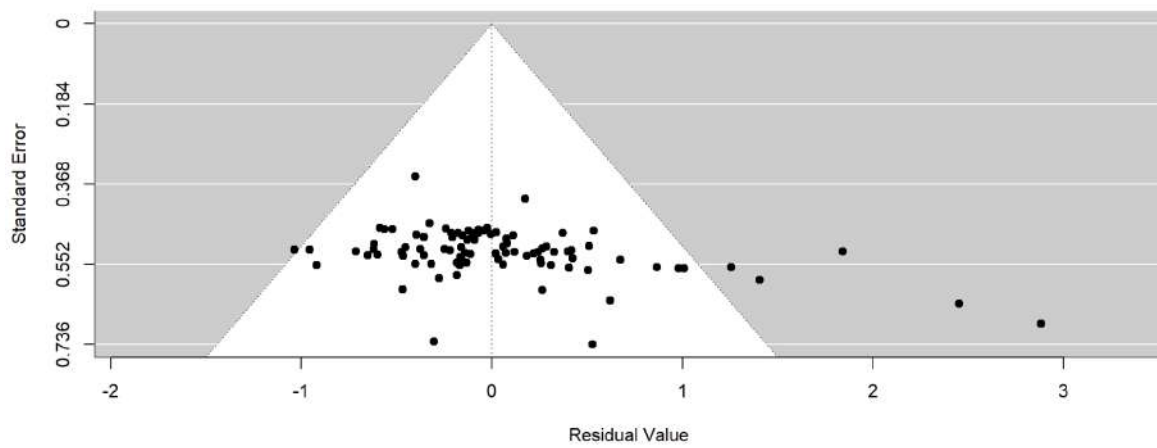

Figure S23.3.4. Funnel plot for Global QoL intervention duration subgroup showing possible publication bias.

Figure S24.3.5.Cancer Stage

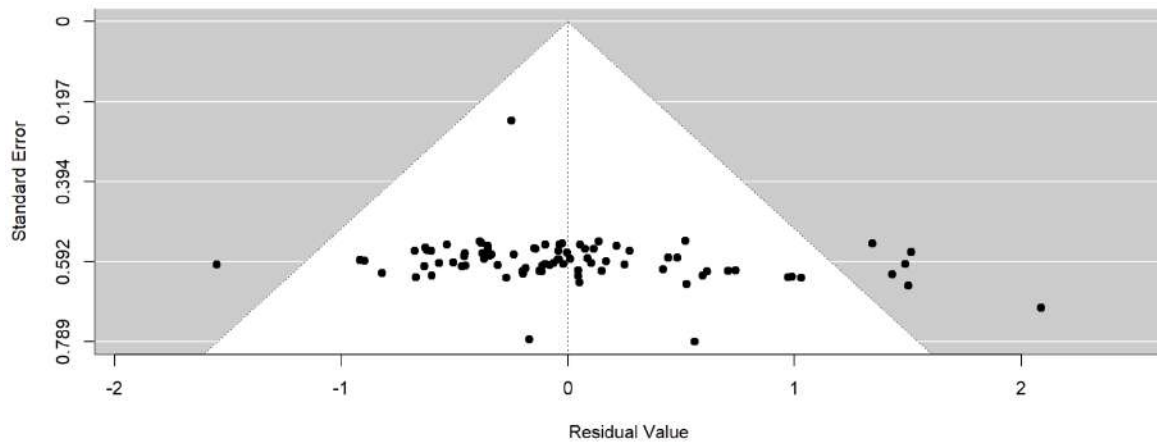

Figure S24.3.5. Funnel plot for Global QoL cancer stage subgroup showing possible publication bias.

Figure S24.3.6.Cancer Type

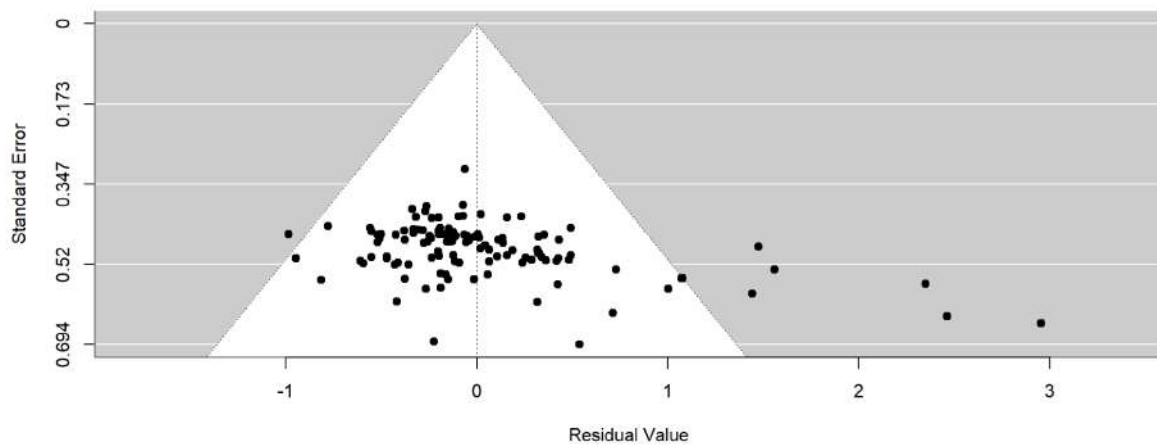

Figure S24.3.6. Funnel plot for Global QoL cancer type subgroup showing possible publication bias.

## S24.4.Emotional Qol

Figure S4.4.1.Provider

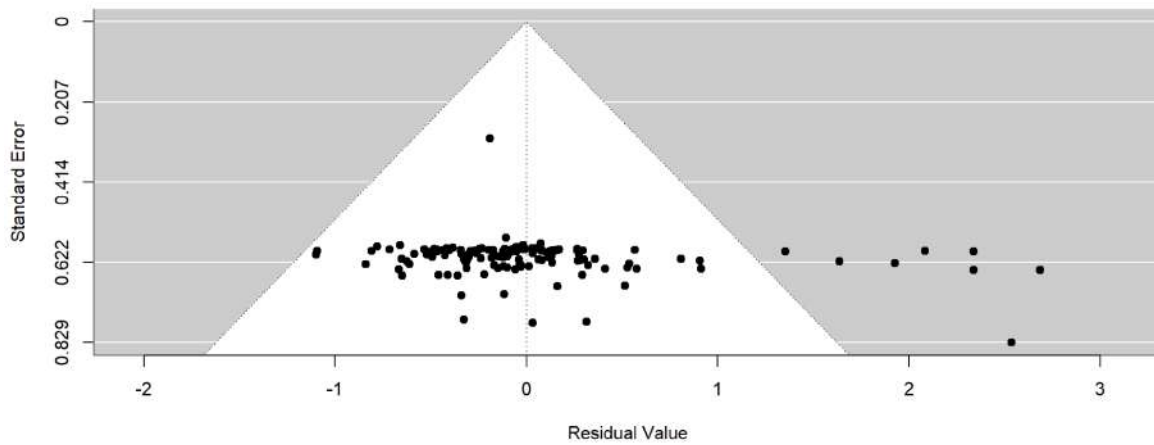

Figure S24.4.1. Funnel plot for Emotional QoL provider subgroup showing possible publication bias.

Figure S24.4.2.Environment

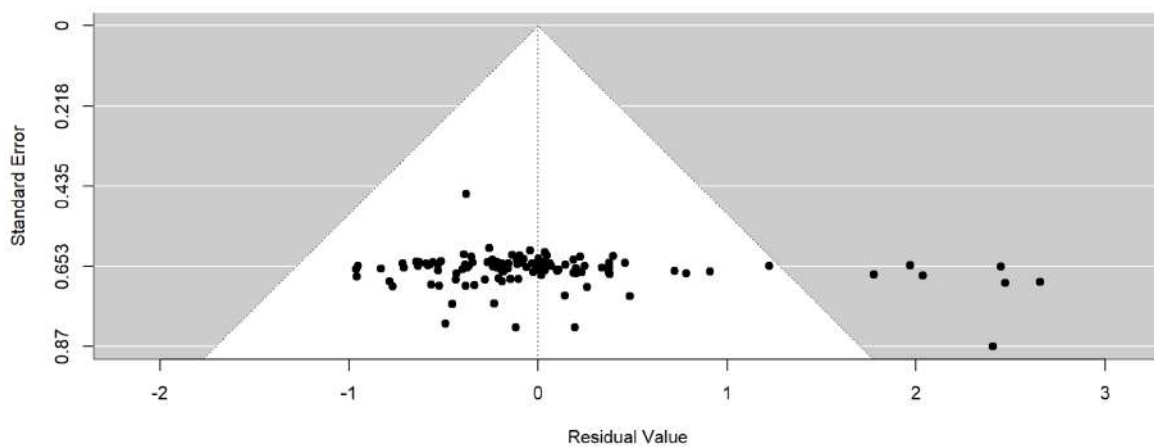

Figure S24.4.2. Funnel plot for Emotional QoL environment subgroup showing possible publication bias.

Figure S24.4.3.Type

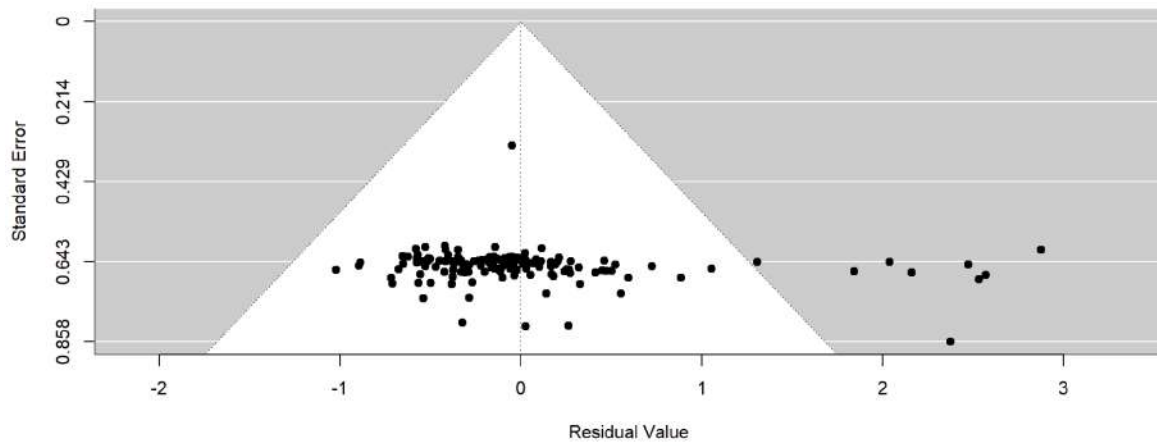

Figure S24.4.3. Funnel plot for Emotional QoL type subgroup showing possible publication bias.

Figure S24.4.4.Duration of Intervention

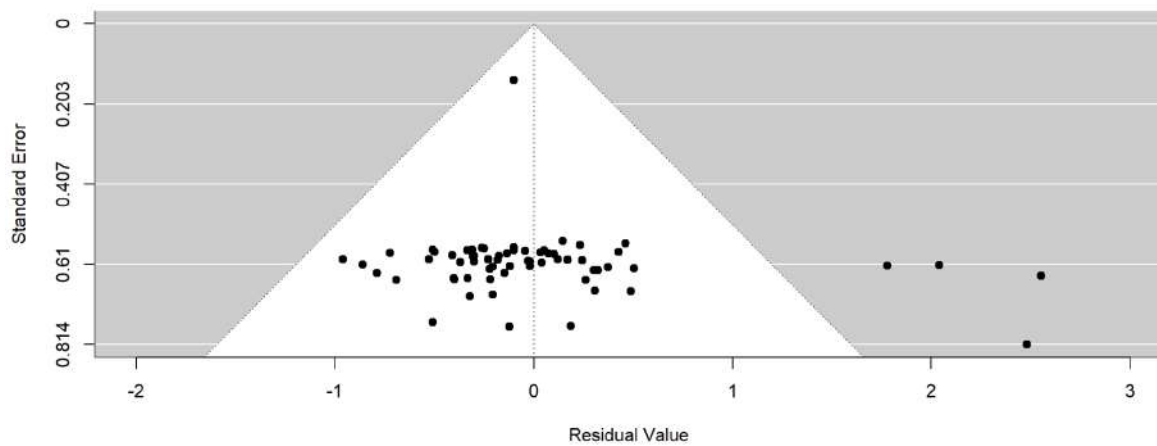

Figure S24.4.4. Funnel plot for Emotional QoL duration subgroup showing possible publication bias.



Figure S24.4.5.Cancer Stage

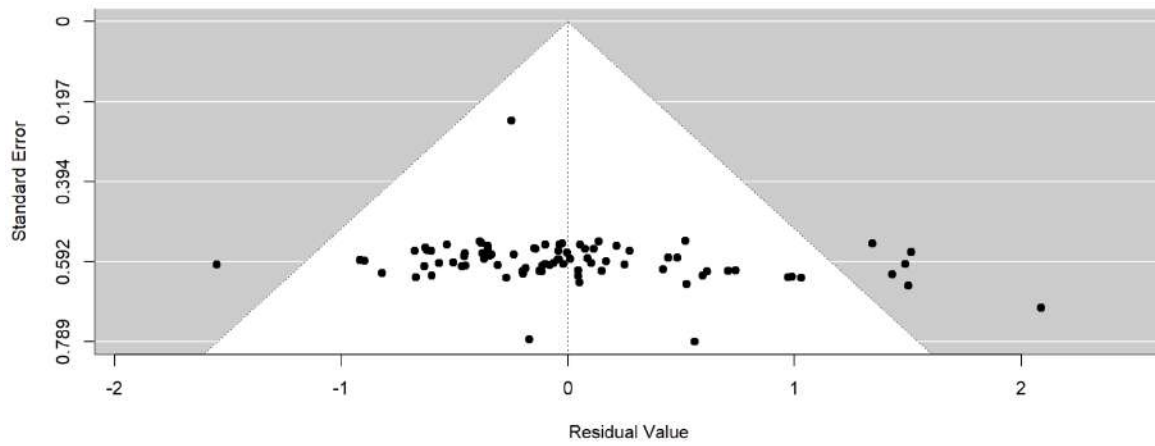

Figure S24.4.5. Funnel plot for Emotional QoL cancer stage subgroup showing possible publication bias.

Figure S24.4.6.Cancer Type

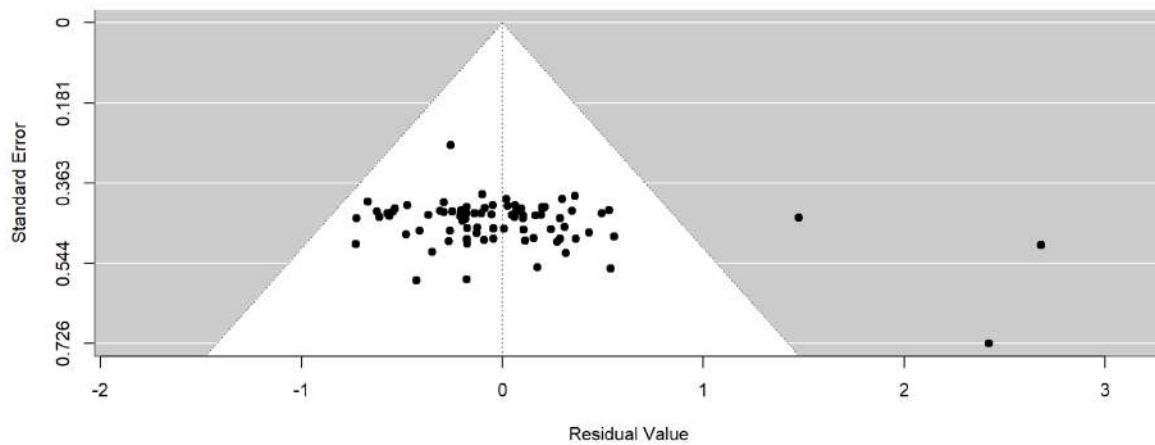

Figure S24.4.6. Funnel plot for Emotional QoL cancer type subgroup showing possible publication bias.

## S24.5.Social QoI

Figure S24.5.1.Provider



Figure S24.5.1. Funnel plot for Social QoI provider subgroup showing possible publication bias

Figure S24.5.2.Environment

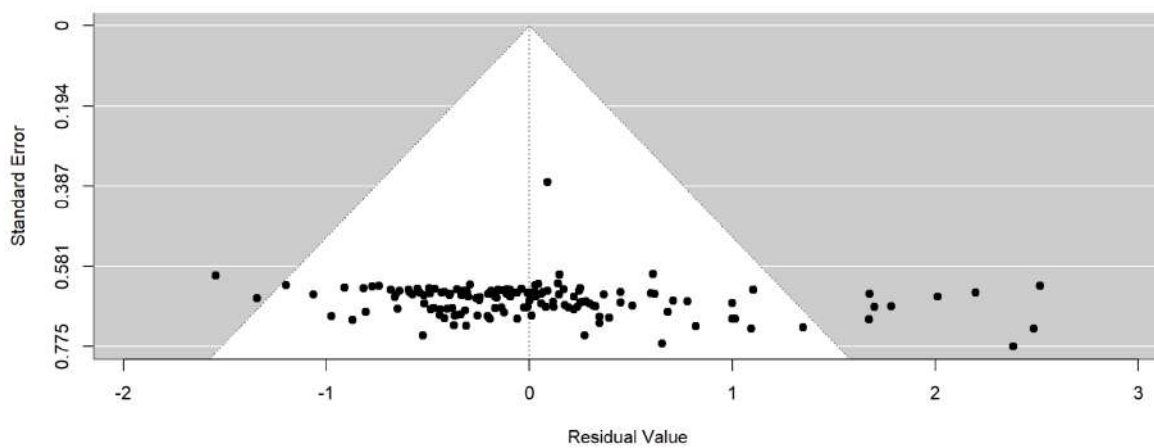

Figure S4.5.2. Funnel plot for Social QoI environment subgroup showing possible publication bias

Figure S24.5.3.Type



Figure S24.5.3.Funnel plot for Social QoL type subgroup showing possible publication bias

Figure S24.5.4. Duration of Intervention

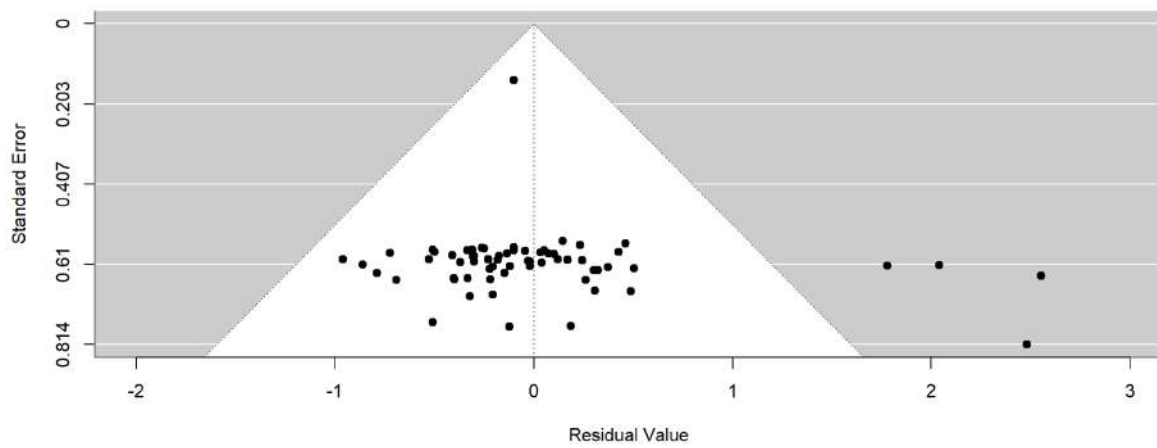

Figure S24.5.4. Funnel plot for Social QoL duration subgroup showing possible publication bias

Figure S24.5.5.Cancer Stage

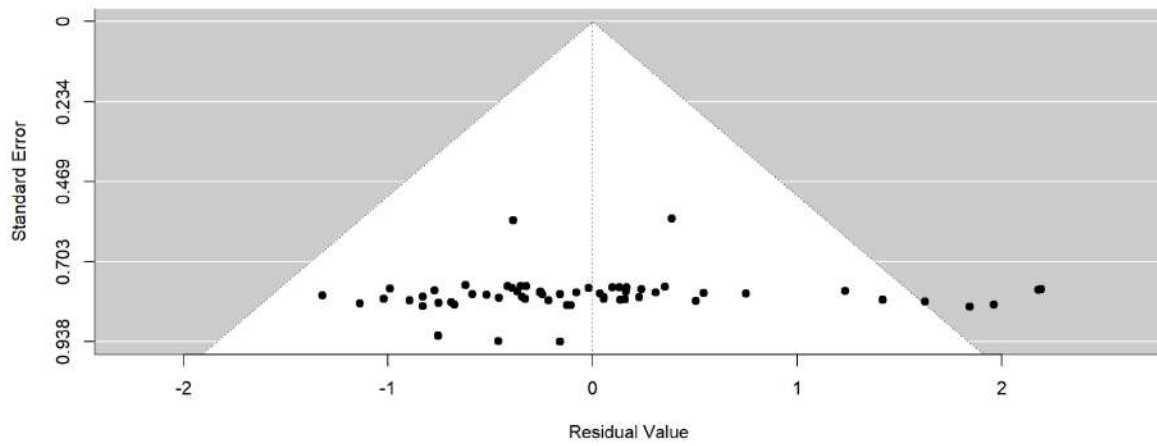

Figure S24.5.5. Funnel plot for Social QoL cancer stage subgroup showing possible publication bias

Figure S24.5.6.Cancer Type

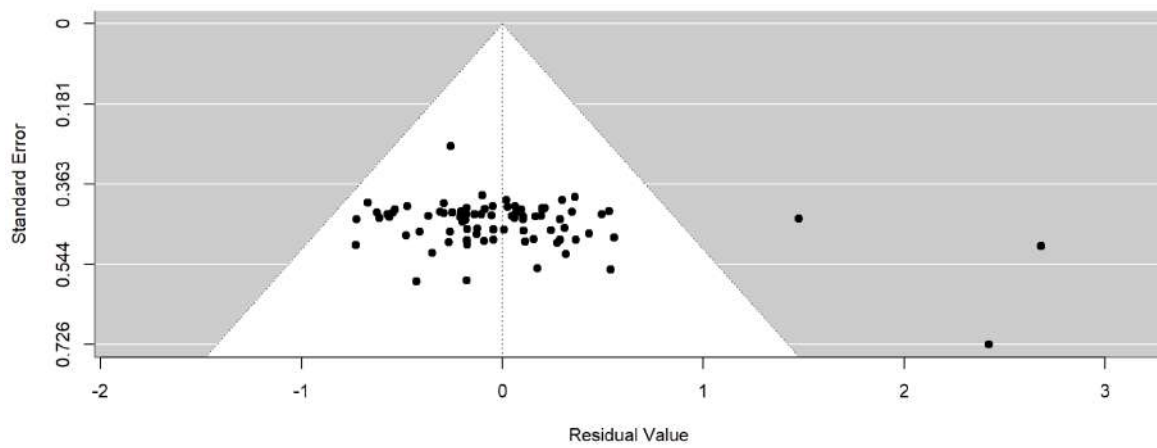

Figure S24.5.6. Funnel plot for Social QoL cancer type subgroup showing possible publication bias

## S24.6. Physical QoL

Figure S24.6.1. Provider

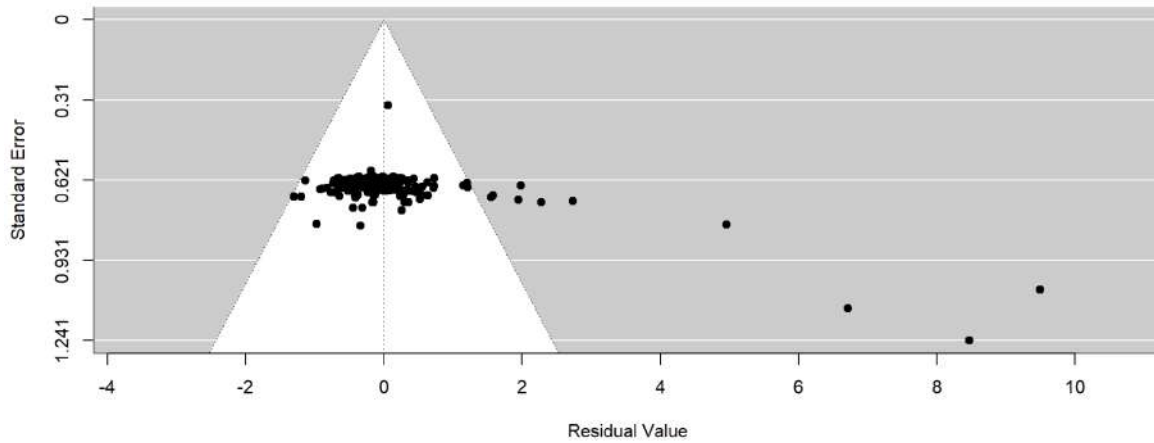

Figure S24.6.1. Funnel plot for Physical QoL provider subgroup showing possible publication bias

Figure S24.6.2. Environment

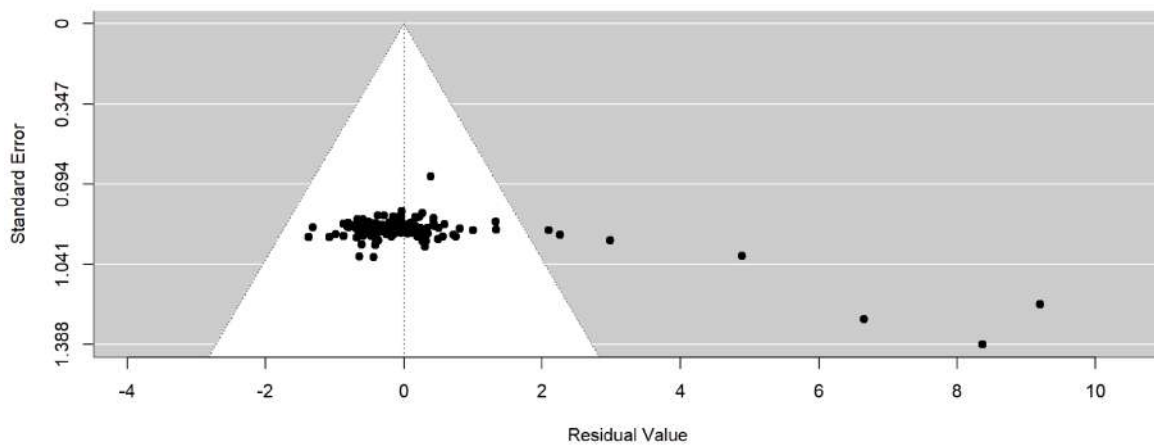

Figure S24.6.2. Funnel plot for Physical QoL Environment subgroup showing possible publication bias

Figure S24.6.3.Type

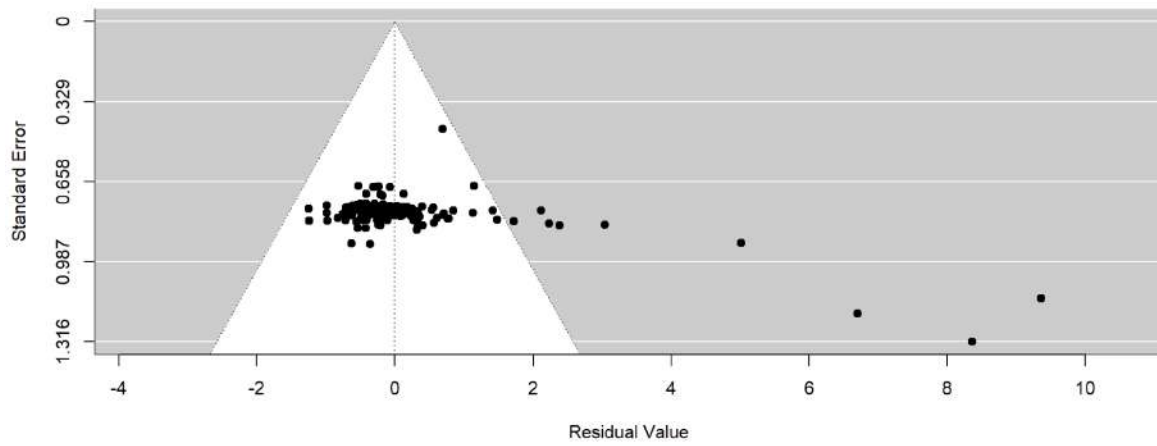

Figure S24.6.3. Funnel plot for Physical QoL type subgroup showing possible publication bias

Figure S24.6.4. Duration of Intervention

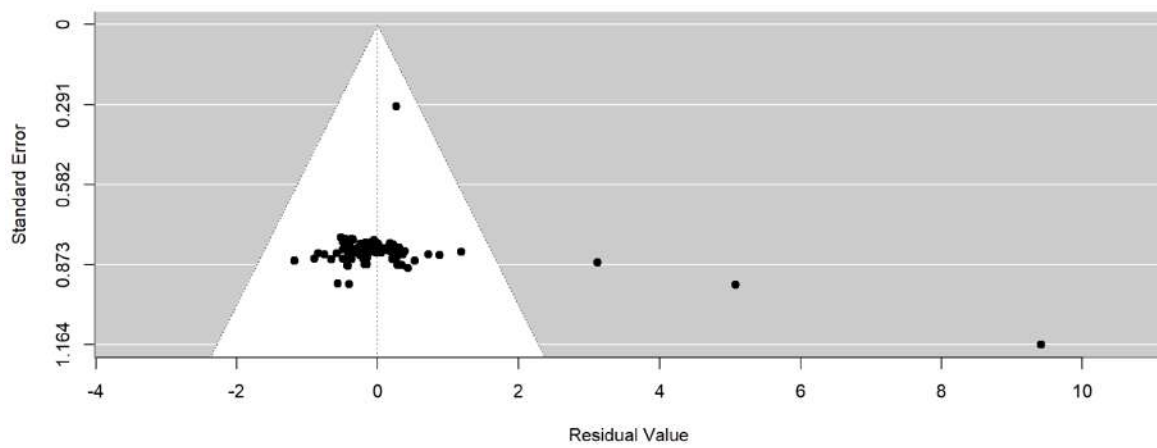

Figure S24.6.4. Funnel plot for Physical QoL duration subgroup showing possible publication bias

Figure S24.6.5. Cancer Stage

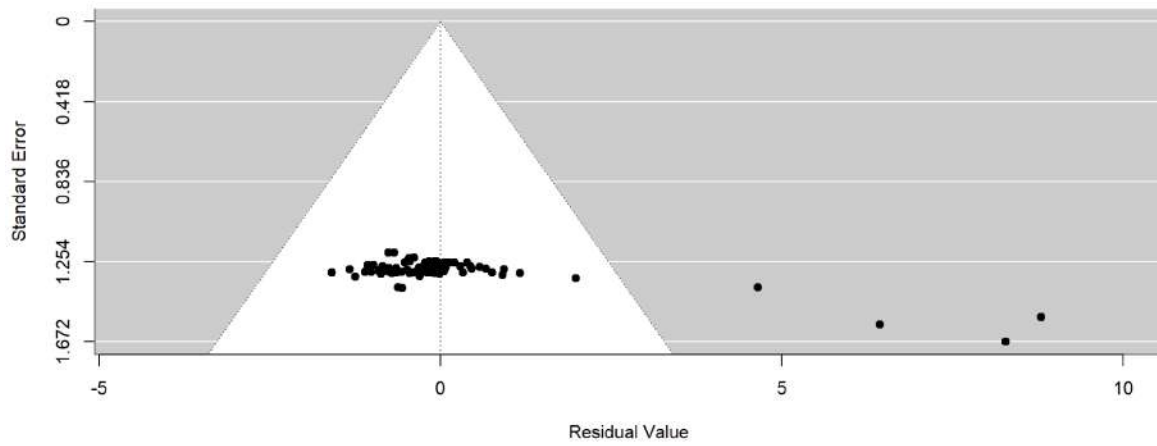

Figure S24.6.5. Funnel plot for Physical QoL cancer stage subgroup showing possible publication bias

Figure S24.6.6. Cancer Type

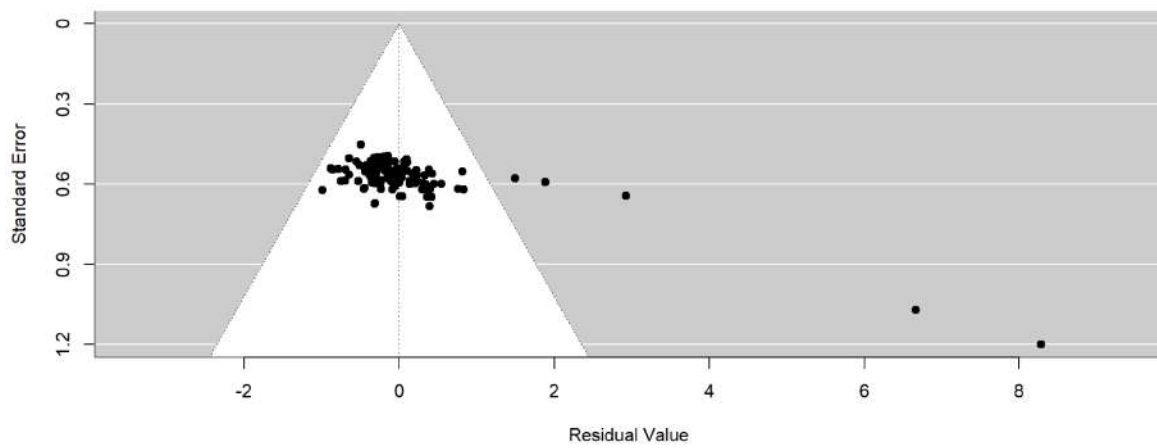

Figure S24.6.6 Funnel plot for Type QoL cancer stage subgroup showing possible publication bias

## REFERENCES

- 1 Huri, M., Huri, E., Kayihan, H. & Altuntas, O. Effects of occupational therapy on quality of life of patients with metastatic prostate cancer. A randomized controlled study. *Saudi Med J* **36**, 954-961 (2015).  
<https://doi.org:10.15537/smj.2015.8.11461>
- 2 Giesler, R. B. *et al.* Improving the quality of life of patients with prostate carcinoma: a randomized trial testing the efficacy of a nurse-driven intervention. *Cancer* **104**, 752-762 (2005). <https://doi.org:10.1002/cncr.21231>
- 3 Wang, J., Yan, C. & Fu, A. A randomized clinical trial of comprehensive education and care program compared to basic care for reducing anxiety and depression and improving quality of life and survival in patients with hepatocellular carcinoma who underwent surgery. *Medicine (Baltimore)* **98**, e17552 (2019). <https://doi.org:10.1097/MD.00000000000017552>
- 4 Trask, P. C., Paterson, A. G., Griffith, K. A., Riba, M. B. & Schwartz, J. L. Cognitive-behavioral intervention for distress in patients with melanoma: comparison with standard medical care and impact on quality of life. *Cancer* **98**, 854-864 (2003). <https://doi.org:10.1002/cncr.11579>
- 5 Takano, T. *et al.* Effectiveness of self-help workbook intervention on quality of life in cancer patients receiving chemotherapy: results of a randomized controlled trial. *BMC Cancer* **21**, 588 (2021). <https://doi.org:10.1186/s12885-021-08333-2>
- 6 McCaughan, E., Curran, C., Northouse, L. & Parahoo, K. Evaluating a psychosocial intervention for men with prostate cancer and their partners: Outcomes and lessons learned from a randomized controlled trial. *Appl Nurs Res* **40**, 143-151 (2018). <https://doi.org:10.1016/j.apnr.2018.01.008>
- 7 Walker, J. *et al.* Integrated collaborative care for major depression comorbid with a poor prognosis cancer (SMaRT Oncology-3): a multicentre randomised controlled trial in patients with lung cancer. *Lancet Oncol* **15**, 1168-1176 (2014). [https://doi.org:10.1016/S1470-2045\(14\)70343-2](https://doi.org:10.1016/S1470-2045(14)70343-2)
- 8 Zhang, L. *et al.* Reminiscence therapy exhibits alleviation of anxiety and improvement of life quality in postoperative gastric cancer patients: A randomized, controlled study. *Medicine* **100**, e26821 (2021).  
<https://doi.org:10.1097/md.00000000000026821>
- 9 Walker, L. G. *et al.* Psychological, clinical and pathological effects of relaxation training and guided imagery during primary chemotherapy. *Br J Cancer* **80**, 262-268 (1999). <https://doi.org:10.1038/sj.bjc.6690349>
- 10 Arving, C. *et al.* Individual psychosocial support for breast cancer patients: a randomized study of nurse versus psychologist interventions and standard care. *Cancer Nurs* **30**, E10-19 (2007).  
<https://doi.org:10.1097/01.NCC.0000270709.64790.05>
- 11 Liu, T. *et al.* Mindfulness-based stress reduction in patients with differentiated thyroid cancer receiving radioactive iodine therapy: a randomized controlled trial. *Cancer Manag Res* **11**, 467-474 (2019).  
<https://doi.org:10.2147/CMAR.S183299>



- 12 Lutgendorf, S. K. *et al.* Preservation of immune function in cervical cancer patients during chemoradiation using a novel integrative approach. *Brain Behav Immun* **24**, 1231-1240 (2010). <https://doi.org:10.1016/j.bbi.2010.06.014>
- 13 Miaskowski, C. *et al.* The use of a responder analysis to identify differences in patient outcomes following a self-care intervention to improve cancer pain management. *Pain* **129**, 55-63 (2007).  
<https://doi.org:10.1016/j.pain.2006.09.031>
- 14 Lee, Y. H., Lai, G. M., Lee, D. C., Tsai Lai, L. J. & Chang, Y. P. Promoting Physical and Psychological Rehabilitation Activities and Evaluating Potential Links Among Cancer-Related Fatigue, Fear of Recurrence, Quality of Life, and Physiological Indicators in Cancer Survivors. *Integr Cancer Ther* **17**, 1183-1194 (2018). <https://doi.org:10.1177/1534735418805149>
- 15 Hawkes, A. L., Pakenham, K. I., Chambers, S. K., Patrao, T. A. & Courneya, K. S. Effects of a multiple health behavior change intervention for colorectal cancer survivors on psychosocial outcomes and quality of life: a randomized controlled trial. *Ann Behav Med* **48**, 359-370 (2014).  
<https://doi.org:10.1007/s12160-014-9610-2>
- 16 Yoo, H. J., Ahn, S. H., Kim, S. B., Kim, W. K. & Han, O. S. Efficacy of progressive muscle relaxation training and guided imagery in reducing chemotherapy side effects in patients with breast cancer and in improving their quality of life. *Support Care Cancer* **13**, 826-833 (2005).  
<https://doi.org:10.1007/s00520-005-0806-7>
- 17 Klinkhammer-Schalke, M. *et al.* Direct improvement of quality of life using a tailored quality of life diagnosis and therapy pathway: randomised trial in 200 women with breast cancer. *Br J Cancer* **106**, 826-838 (2012).  
<https://doi.org:10.1038/bjc.2012.4>
- 18 Marchioro, G. *et al.* The impact of a psychological intervention on quality of life in non-metastatic breast cancer. *Eur J Cancer* **32A**, 1612-1615 (1996).  
[https://doi.org:10.1016/0959-8049\(96\)00134-7](https://doi.org:10.1016/0959-8049(96)00134-7)
- 19 Walczak, A. *et al.* Encouraging early discussion of life expectancy and end-of-life care: A randomised controlled trial of a nurse-led communication support program for patients and caregivers. *Int J Nurs Stud* **67**, 31-40 (2017).  
<https://doi.org:10.1016/j.ijnurstu.2016.10.008>
- 20 Petersen, R. W. & Quinlivan, J. A. Preventing anxiety and depression in gynaecological cancer: a randomised controlled trial. *BJOG* **109**, 386-394 (2002). <https://doi.org:10.1111/j.1471-0528.2002.01271.x>
- 21 Vanbutsele, G. *et al.* Effect of early and systematic integration of palliative care in patients with advanced cancer: a randomised controlled trial. *Lancet Oncol* **19**, 394-404 (2018). [https://doi.org:10.1016/S1470-2045\(18\)30060-3](https://doi.org:10.1016/S1470-2045(18)30060-3)
- 22 Schofield, P. *et al.* A tailored, supportive care intervention using systematic assessment designed for people with inoperable lung cancer: a randomised controlled trial. *Psychooncology* **22**, 2445-2453 (2013).  
<https://doi.org:10.1002/pon.3306>
- 23 Qin, X. *et al.* The effect of psychological status on postoperative nutrition, immune function and life quality in elderly patients with gastric cancer. *Biomedical Research (India)* **28**, 3912-3916 (2017).
- 24 Zhou, L., Tian, Y., Yu, J., Chen, T. & An, F. Effect of at-home cognitive behavior therapy combined with nursing on revised piper fatigue scale, pittsburgh sleep quality index, self-rating anxiety scale and self-rating

- depression scale of ovarian cancer patients after chemotherapy. *International journal of clinical and experimental medicine* **13**, 4227-4234 (2020).
- 25 Northouse, L. L. *et al.* Randomized clinical trial of a family intervention for prostate cancer patients and their spouses. *Cancer* **110**, 2809-2818 (2007). <https://doi.org:10.1002/cncr.23114>
- 26 Penedo, F. J. *et al.* Technology-Based Psychosocial Intervention to Improve Quality of Life and Reduce Symptom Burden in Men with Advanced Prostate Cancer: Results from a Randomized Controlled Trial. *Int J Behav Med* **27**, 490-505 (2020). <https://doi.org:10.1007/s12529-019-09839-7>
- 27 Penedo, F. J. *et al.* Cognitive behavioral stress management intervention improves quality of life in Spanish monolingual hispanic men treated for localized prostate cancer: results of a randomized controlled trial. *Int J Behav Med* **14**, 164-172 (2007). <https://doi.org:10.1007/BF03000188>
- 28 Rodriguez Vega, B. *et al.* Combined therapy versus usual care for the treatment of depression in oncologic patients: a randomized controlled trial. *Psychooncology* **20**, 943-952 (2011). <https://doi.org:10.1002/pon.1800>
- 29 Peoples, A. R. *et al.* Effects of cognitive behavioral therapy for insomnia and armodafinil on quality of life in cancer survivors: a randomized placebo-controlled trial. *J Cancer Surviv* **11**, 401-409 (2017). <https://doi.org:10.1007/s11764-017-0597-0>
- 30 Parker, P. A. *et al.* The effects of a presurgical stress management intervention for men with prostate cancer undergoing radical prostatectomy. *J Clin Oncol* **27**, 3169-3176 (2009). <https://doi.org:10.1200/JCO.2007.16.0036>
- 31 van de Wal, M., Thewes, B., Gielissen, M., Speckens, A. & Prins, J. Efficacy of Blended Cognitive Behavior Therapy for High Fear of Recurrence in Breast, Prostate, and Colorectal Cancer Survivors: The SWORD Study, a Randomized Controlled Trial. *J Clin Oncol* **35**, 2173-2183 (2017). <https://doi.org:10.1200/JCO.2016.70.5301>
- 32 Serfaty, M. *et al.* Acceptance and commitment therapy for adults with advanced cancer (CanACT): A feasibility randomised controlled trial. *Psychooncology* **28**, 488-496 (2019). <https://doi.org:10.1002/pon.4960>
- 33 Sandsund, C. *et al.* Holistic needs assessment and care plans for women with gynaecological cancer: do they improve cancer-specific health-related quality of life? A randomised controlled trial using mixed methods. *BMJ Support Palliat Care* **10**, e16 (2020). <https://doi.org:10.1136/bmjspcare-2016-001207>
- 34 Wu, H. X. *et al.* Psychological and behavioral intervention improves the quality of life and mental health of patients suffering from differentiated thyroid cancer treated with postoperative radioactive iodine-131. *Neuropsychiatr Dis Treat* **12**, 1055-1060 (2016). <https://doi.org:10.2147/NDT.S105460>
- 35 Rodin, G. *et al.* Emotion And Symptom-focused Engagement (EASE): a randomized phase II trial of an integrated psychological and palliative care intervention for patients with acute leukemia. *Support Care Cancer* **28**, 163-176 (2020). <https://doi.org:10.1007/s00520-019-04723-2>
- 36 Zhou, J. *et al.* Effect of PDCA-based nursing management model on the quality of life and complications of patients with acute leukemia undergoing chemotherapy. *Am J Transl Res* **13**, 3246-3253 (2021).
- 37 Thomas, M. L. *et al.* A randomized, clinical trial of education or motivational-interviewing-based coaching compared to usual care to improve cancer pain management. *Oncol Nurs Forum* **39**, 39-49 (2012). <https://doi.org:10.1188/12.ONF.39-49>

- 38 Fernandez-Rodriguez, C., Villoria-Fernandez, E., Fernandez-Garcia, P., Gonzalez-Fernandez, S. & Perez-Alvarez, M. Effects of Behavioral Activation on the Quality of Life and Emotional State of Lung Cancer and Breast Cancer Patients During Chemotherapy Treatment. *Behav Modif* **43**, 151-180 (2019). <https://doi.org:10.1177/0145445517746915>
- 39 Fann, J. R., Fan, M. Y. & Unutzer, J. Improving primary care for older adults with cancer and depression. *J Gen Intern Med* **24 Suppl 2**, S417-424 (2009). <https://doi.org:10.1007/s11606-009-0999-4>
- 40 Ohlsson-Nevo, E., Karlsson, J. & Nilsson, U. Effects of a psycho-educational programme on health-related quality of life in patients treated for colorectal and anal cancer: A feasibility trial. *Eur J Oncol Nurs* **21**, 181-188 (2016). <https://doi.org:10.1016/j.ejon.2015.10.002>
- 41 Antoni, M. H. *et al.* How stress management improves quality of life after treatment for breast cancer. *J Consult Clin Psychol* **74**, 1143-1152 (2006). <https://doi.org:10.1037/0022-006X.74.6.1152>
- 42 Ashing, K. T. & George, M. Exploring the efficacy of a paraprofessional delivered telephonic psychoeducational intervention on emotional well-being in African American breast cancer survivors. *Support Care Cancer* **28**, 1163-1171 (2020). <https://doi.org:10.1007/s00520-019-04899-7>
- 43 Esplen, M. J., Warner, E., Boquiren, V., Wong, J. & Toner, B. Restoring body image after cancer (ReBIC): A group therapy intervention. *Psychooncology* **29**, 671-680 (2020). <https://doi.org:10.1002/pon.5304>
- 44 Burns, D. S. The effect of the bonny method of guided imagery and music on the mood and life quality of cancer patients. *J Music Ther* **38**, 51-65 (2001). <https://doi.org:10.1093/jmt/38.1.51>
- 45 Dos Santos, M. *et al.* Cognitive rehabilitation program to improve cognition of cancer patients treated with chemotherapy: A 3-arm randomized trial. *Cancer* **126**, 5328-5336 (2020). <https://doi.org:10.1002/cncr.33186>
- 46 Gaston-Johansson, F. *et al.* Long-term effect of the self-management comprehensive coping strategy program on quality of life in patients with breast cancer treated with high-dose chemotherapy. *Psychooncology* **22**, 530-539 (2013). <https://doi.org:10.1002/pon.3031>
- 47 Garssen, B. *et al.* Stress management training for breast cancer surgery patients. *Psychooncology* **22**, 572-580 (2013). <https://doi.org:10.1002/pon.3034>
- 48 Hall, S. *et al.* A novel approach to enhancing hope in patients with advanced cancer: a randomised phase II trial of dignity therapy. *BMJ Support Palliat Care* **1**, 315-321 (2011). <https://doi.org:10.1136/bmjspcare-2011-000054>
- 49 Napoles, A. M. *et al.* Nuevo Amanecer: results of a randomized controlled trial of a community-based, peer-delivered stress management intervention to improve quality of life in Latinas with breast cancer. *Am J Public Health* **105 Suppl 3**, e55-63 (2015). <https://doi.org:10.2105/AJPH.2015.302598>
- 50 Gao, Q., Li, H., Zou, Y., Hou, B. & Liu, L. Effectiveness of a comprehensive post-operative health education program in improving quality of life after gastric cancer surgery. *Ann Palliat Med* **9**, 921-926 (2020). <https://doi.org:10.21037/apm.2020.04.14>
- 51 Dieng, M. *et al.* Benefits of a brief psychological intervention targeting fear of cancer recurrence in people at high risk of developing another melanoma: 12-month follow-up results of a randomized controlled trial. *Br J Dermatol* **182**, 860-868 (2020). <https://doi.org:10.1111/bjd.17990>

- 52 Karlsen, R. V. *et al.* Couple Counseling and Pelvic Floor Muscle Training for Men Operated for Prostate Cancer and for Their Female Partners: Results From the Randomized ProCan Trial. *Sex Med* **9**, 100350 (2021).  
<https://doi.org:10.1016/j.esxm.2021.100350>
- 53 Boele, F. W. *et al.* Internet-based guided self-help for glioma patients with depressive symptoms: a randomized controlled trial. *J Neurooncol* **137**, 191-203 (2018). <https://doi.org:10.1007/s11060-017-2712-5>
- 54 Braeken, A. P. *et al.* Psychosocial screening effects on health-related outcomes in patients receiving radiotherapy. A cluster randomised controlled trial. *Psychooncology* **22**, 2736-2746 (2013). <https://doi.org:10.1002/pon.3340>
- 55 Cheung, Y. L., Molassiotis, A. & Chang, A. M. The effect of progressive muscle relaxation training on anxiety and quality of life after stoma surgery in colorectal cancer patients. *Psychooncology* **12**, 254-266 (2003).  
<https://doi.org:10.1002/pon.638>
- 56 van der Hout, A. *et al.* Role of eHealth application Oncokompas in supporting self-management of symptoms and health-related quality of life in cancer survivors: a randomised, controlled trial. *Lancet Oncol* **21**, 80-94 (2020).  
[https://doi.org:10.1016/S1470-2045\(19\)30675-8](https://doi.org:10.1016/S1470-2045(19)30675-8)
- 57 Ham, K. *et al.* Preliminary Results From a Randomized Controlled Study for an App-Based Cognitive Behavioral Therapy Program for Depression and Anxiety in Cancer Patients. *Front Psychol* **10**, 1592 (2019).  
<https://doi.org:10.3389/fpsyg.2019.01592>
- 58 Ding, K. *et al.* Managing Cancer and Living Meaningfully (CALM) Intervention on Chemotherapy-Related Cognitive Impairment in Breast Cancer Survivors. *Integr Cancer Ther* **19**, 1534735420938450 (2020).  
<https://doi.org:10.1177/1534735420938450>
- 59 Fillion, L. *et al.* A brief intervention for fatigue management in breast cancer survivors. *Cancer Nurs* **31**, 145-159 (2008).  
<https://doi.org:10.1097/01.NCC.0000305698.97625.95>
- 60 Gonzalez-Hernandez, E. *et al.* Cognitively-Based Compassion Training (CBCT((R))) in Breast Cancer Survivors: A Randomized Clinical Trial Study. *Integr Cancer Ther* **17**, 684-696 (2018).  
<https://doi.org:10.1177/1534735418772095>
- 61 Breitbart, W. *et al.* Individual meaning-centered psychotherapy for the treatment of psychological and existential distress: A randomized controlled trial in patients with advanced cancer. *Cancer* **124**, 3231-3239 (2018).  
<https://doi.org:10.1002/cncr.31539>
- 62 van der Meulen, I. C. *et al.* Long-term effect of a nurse-led psychosocial intervention on health-related quality of life in patients with head and neck cancer: a randomised controlled trial. *Br J Cancer* **110**, 593-601 (2014).  
<https://doi.org:10.1038/bjc.2013.733>
- 63 Turner, J. *et al.* A tiered multidisciplinary approach to the psychosocial care of adult cancer patients integrated into routine care: the PROMPT study (a cluster-randomised controlled trial). *Support Care Cancer* **25**, 17-26 (2017).  
<https://doi.org:10.1007/s00520-016-3382-0>
- 64 Reese, J. B. *et al.* Efficacy of a multimedia intervention in facilitating breast cancer patients' clinical communication about sexual health: Results of a randomized controlled trial. *Psychooncology* **30**, 681-690 (2021).  
<https://doi.org:10.1002/pon.5613>

- 65 Powell, C. B. *et al.* A randomized study of the effectiveness of a brief psychosocial intervention for women attending a gynecologic cancer clinic. *Gynecol Oncol* **111**, 137-143 (2008). <https://doi.org:10.1016/j.ygyno.2008.06.024>
- 66 Nikbakhsh, N. *et al.* Citalopram and group psychotherapy in breast cancer patients: A randomized clinical trial. *Med J Islam Repub Iran* **32**, 68 (2018). <https://doi.org:10.14196/mjiri.32.68>
- 67 Fang, P., Wu. The effect of psychological support combined with humanistic care on the negative emotions and satisfaction with nursing among gastric cancer surgery patients. (2020).
- 68 Mihuta, M. E., Green, H. J. & Shum, D. H. K. Web-based cognitive rehabilitation for survivors of adult cancer: A randomised controlled trial. *Psychooncology* **27**, 1172-1179 (2018). <https://doi.org:10.1002/pon.4615>
- 69 McLachlan, S. A. *et al.* Randomized trial of coordinated psychosocial interventions based on patient self-assessments versus standard care to improve the psychosocial functioning of patients with cancer. *J Clin Oncol* **19**, 4117-4125 (2001). <https://doi.org:10.1200/JCO.2001.19.21.4117>
- 70 Edmonds, C. V., Lockwood, G. A. & Cunningham, A. J. Psychological response to long-term group therapy: a randomized trial with metastatic breast cancer patients. *Psychooncology* **8**, 74-91 (1999). [https://doi.org:10.1002/\(SICI\)1099-1611\(199901/02\)8:1<74::AID-PON339>3.0.CO;2-K](https://doi.org:10.1002/(SICI)1099-1611(199901/02)8:1<74::AID-PON339>3.0.CO;2-K)
- 71 Li, J. & Liu, X. Incremental patient care program decreases anxiety, reduces depression and improves the quality of life in patients with colorectal cancer receiving adjuvant chemotherapy. *Exp Ther Med* **18**, 2789-2798 (2019). <https://doi.org:10.3892/etm.2019.7877>
- 72 Elyasi, F. *et al.* Cognitive-Behavioral Therapy and Hypnosis Intervention on Anxiety, Depression, and Quality of Life in Patients with Breast Cancer Undergoing Chemotherapy: A Clinical Trial. *Middle East Journal of Cancer* **12**, 236-248 (2021). <https://doi.org:10.30476/mejc.2020.83225.1149>
- 73 Ferguson, R. J. *et al.* Development of CBT for chemotherapy-related cognitive change: results of a waitlist control trial. *Psychooncology* **21**, 176-186 (2012). <https://doi.org:10.1002/pon.1878>
- 74 Willems, R. A. *et al.* Short-term effectiveness of a web-based tailored intervention for cancer survivors on quality of life, anxiety, depression, and fatigue: randomized controlled trial. *Psychooncology* **26**, 222-230 (2017). <https://doi.org:10.1002/pon.4113>
- 75 Wu, Q., Liu, Q. & Pan, S. Effect of wechat platform based continuity of care on the quality of life and psychosocial competence in postoperative patients with breast cancer. *International journal of clinical and experimental medicine* **14**, 1162-1171 (2021).
- 76 Yun, Y. H. *et al.* A randomized controlled trial of physical activity, dietary habit, and distress management with the Leadership and Coaching for Health (LEACH) program for disease-free cancer survivors. *BMC Cancer* **17**, 298 (2017). <https://doi.org:10.1186/s12885-017-3290-9>
- 77 Zhao, Y. H. & Xu, Y. Effect of Comprehensive Nursing Based on Cognitive Behavior on Psychological Function of Glioma Patients. *Neuropsychiatr Dis Treat* **17**, 777-785 (2021). <https://doi.org:10.2147/NDT.S286164>

- 78 Zhao, X. *et al.* Influence of psychological intervention on pain and immune functions of patients receiving lung cancer surgery. *Pak J Med Sci* **32**, 155-159 (2016). <https://doi.org/10.12669/pjms.321.8935>
- 79 Rosen, K. D., Paniagua, S. M., Kazanis, W., Jones, S. & Potter, J. S. Quality of life among women diagnosed with breast Cancer: A randomized waitlist controlled trial of commercially available mobile app-delivered mindfulness training. *Psychooncology* **27**, 2023-2030 (2018). <https://doi.org/10.1002/pon.4764>
- 80 Ruiz-Vozmediano, J. *et al.* Influence of a Multidisciplinary Program of Diet, Exercise, and Mindfulness on the Quality of Life of Stage IIA-IIB Breast Cancer Survivors. *Integr Cancer Ther* **19**, 1534735420924757 (2020). <https://doi.org/10.1177/1534735420924757>
- 81 Von Ah, D. *et al.* Advanced cognitive training for breast cancer survivors: a randomized controlled trial. *Breast Cancer Res Treat* **135**, 799-809 (2012). <https://doi.org/10.1007/s10549-012-2210-6>
- 82 Lengacher, C. A. *et al.* Randomized controlled trial of mindfulness-based stress reduction (MBSR) for survivors of breast cancer. *Psychooncology* **18**, 1261-1272 (2009). <https://doi.org/10.1002/pon.1529>
- 83 Beatty, L., Koczwara, B. & Wade, T. Evaluating the efficacy of a self-guided Web-based CBT intervention for reducing cancer-distress: a randomised controlled trial. *Support Care Cancer* **24**, 1043-1051 (2016). <https://doi.org/10.1007/s00520-015-2867-6>
- 84 Chu, X. Effect of Mindfulness Based Cognitive Therapy on the Mental Health and Quality of Life in Patients with Breast Cancer. (2020). <https://doi.org/10.36468/pharmaceutical-sciences.spl.143>
- 85 Berglund, G. *et al.* "Between Men": a psychosocial rehabilitation programme for men with prostate cancer. *Acta Oncol* **46**, 83-89 (2007). <https://doi.org/10.1080/02841860600857326>
- 86 Dirksen, S. R. & Epstein, D. R. Efficacy of an insomnia intervention on fatigue, mood and quality of life in breast cancer survivors. *J Adv Nurs* **61**, 664-675 (2008). <https://doi.org/10.1111/j.1365-2648.2007.04560.x>
- 87 Dolbeault, S. *et al.* The effectiveness of a psycho-educational group after early-stage breast cancer treatment: results of a randomized French study. *Psychooncology* **18**, 647-656 (2009). <https://doi.org/10.1002/pon.1440>
- 88 Aranda, S. *et al.* Meeting the support and information needs of women with advanced breast cancer: a randomised controlled trial. *Br J Cancer* **95**, 667-673 (2006). <https://doi.org/10.1038/sj.bjc.6603320>
- 89 Baoyindeliger, L. Z. Rehabilitation and quality of life improvement of patients with esophageal carcinoma surgery by psychological intervention. (2020).
- 90 Armes, J., Chalder, T., Addington-Hall, J., Richardson, A. & Hotopf, M. A randomized controlled trial to evaluate the effectiveness of a brief, behaviorally oriented intervention for cancer-related fatigue. *Cancer* **110**, 1385-1395 (2007). <https://doi.org/10.1002/cncr.22923>
- 91 Compen, F. *et al.* Face-to-Face and Internet-Based Mindfulness-Based Cognitive Therapy Compared With Treatment as Usual in Reducing Psychological Distress in Patients With Cancer: A Multicenter Randomized Controlled Trial. *J Clin Oncol* **36**, 2413-2421 (2018). <https://doi.org/10.1200/JCO.2017.76.5669>
- 92 Schofield, P. *et al.* Nurse-led group consultation intervention reduces depressive symptoms in men with localised prostate cancer: a cluster

- randomised controlled trial. *BMC Cancer* **16**, 637 (2016).  
<https://doi.org:10.1186/s12885-016-2687-1>
- 93 Hauffman, A. *et al.* Cocreated internet-based stepped care for individuals with cancer and concurrent symptoms of anxiety and depression: Results from the U-CARE AdultCan randomized controlled trial. *Psychooncology* **29**, 2012-2018 (2020). <https://doi.org:10.1002/pon.5489>
- 94 Jelvehzadeh, F., Dogaheh, E. R., Bernstein, C., Shakiba, S. & Ranjbar, H. The effect of a group cognitive behavioral therapy on the quality of life and emotional disturbance of women with breast cancer. *Support Care Cancer* **30**, 305-312 (2022). <https://doi.org:10.1007/s00520-021-06421-4>
- 95 Qiu, H. Effects of cognitive behavioral therapy for depression on improving insomnia and quality of life in Chinese women with breast cancer: results of a randomized, controlled, multicenter trial. (2018).  
<https://doi.org:https://doi.org/10.2147%2FNDT.S171297>
- 96 Girgis, A., Breen, S., Stacey, F. & Lecathelinais, C. Impact of two supportive care interventions on anxiety, depression, quality of life, and unmet needs in patients with nonlocalized breast and colorectal cancers. *J Clin Oncol* **27**, 6180-6190 (2009). <https://doi.org:10.1200/JCO.2009.22.8718>
- 97 Guan, S. The improvement strategies of psychological intervention nursing on the anxiety and living quality of patients with gynecologic malignancies during postoperative chemotherapy. (2019).
- 98 Guo, Z. The benefits of psychosocial interventions for cancer patients undergoing radiotherapy. (2013).
- 99 Heiney, S. P. *et al.* Efficacy of therapeutic group by telephone for women with breast cancer. *Cancer Nurs* **26**, 439-447 (2003).  
<https://doi.org:10.1097/00002820-200312000-00003>
- 100 Henderson, V. P. *et al.* A randomized controlled trial of mindfulness-based stress reduction for women with early-stage breast cancer receiving radiotherapy. *Integr Cancer Ther* **12**, 404-413 (2013).  
<https://doi.org:10.1177/1534735412473640>
- 101 Henderson, V. P. *et al.* The effects of mindfulness-based stress reduction on psychosocial outcomes and quality of life in early-stage breast cancer patients: a randomized trial. *Breast Cancer Res Treat* **131**, 99-109 (2012).  
<https://doi.org:10.1007/s10549-011-1738-1>
- 102 Hoffman, C. J. *et al.* Effectiveness of mindfulness-based stress reduction in mood, breast- and endocrine-related quality of life, and well-being in stage 0 to III breast cancer: a randomized, controlled trial. *J Clin Oncol* **30**, 1335-1342 (2012). <https://doi.org:10.1200/JCO.2010.34.0331>
- 103 Johansson, B. *et al.* Health-related quality of life and distress in cancer patients: results from a large randomised study. *Br J Cancer* **99**, 1975-1983 (2008). <https://doi.org:10.1038/sj.bjc.6604789>
- 104 Kim, Y. H., Choi, K. S., Han, K. & Kim, H. W. A psychological intervention programme for patients with breast cancer under chemotherapy and at a high risk of depression: A randomised clinical trial. *J Clin Nurs* **27**, 572-581 (2018).  
<https://doi.org:10.1111/jocn.13910>
- 105 Klafke, N. *et al.* The effects of an integrated supportive care intervention on quality of life outcomes in outpatients with breast and gynecologic cancer undergoing chemotherapy: Results from a randomized controlled trial. *Cancer Med* **8**, 3666-3676 (2019). <https://doi.org:10.1002/cam4.2196>

- 106 Rahmani, S. & Talepasand, S. The effect of group mindfulness - based stress reduction program and conscious yoga on the fatigue severity and global and specific life quality in women with breast cancer. *Med J Islam Repub Iran* **29**, 175 (2015).
- 107 Reich, R. R. *et al.* Mindfulness-Based Stress Reduction in Post-treatment Breast Cancer Patients: Immediate and Sustained Effects Across Multiple Symptom Clusters. *J Pain Symptom Manage* **53**, 85-95 (2017). <https://doi.org:10.1016/j.jpainsymman.2016.08.005>
- 108 Savard, J. *et al.* Randomized clinical trial on cognitive therapy for depression in women with metastatic breast cancer: psychological and immunological effects. *Palliat Support Care* **4**, 219-237 (2006). <https://doi.org:10.1017/s1478951506060305>
- 109 Schellekens, M. P. J. *et al.* Mindfulness-Based Cancer Recovery (MBCR) versus Supportive Expressive Group Therapy (SET) for distressed breast cancer survivors: evaluating mindfulness and social support as mediators. *J Behav Med* **40**, 414-422 (2017). <https://doi.org:10.1007/s10865-016-9799-6>
- 110 van den Berg, S. BREATH: Web-Based Self-Management for Psychological Adjustment After Primary Breast Cancer—Results of a Multicenter Randomized Controlled Trial. *Journal of Clinical Oncology* (2015). <https://doi.org:10.1200/JCO.2013.54.9386>
- 111 Wang, T. J. *et al.* Efficacy of a self-management program on quality of life in colorectal cancer patients: A randomized controlled trial. *Eur J Oncol Nurs* **67**, 102431 (2023). <https://doi.org:10.1016/j.ejon.2023.102431>
- 112 Xia, S. Effect of cognitive behavioral stress management on anxiety, depression, and quality of life in colorectal cancer patients post tumor resection: a randomized, controlled study. *Ir J Med Sci* **192**, 1637-1644 (2023). <https://doi.org:10.1007/s11845-023-03405-7>
- 113 Peng, L. *et al.* Effects of an online mindfulness-based intervention on Fear of Cancer Recurrence and quality of life among Chinese breast cancer survivors. *Complement Ther Clin Pract* **49**, 101686 (2022). <https://doi.org:10.1016/j.ctcp.2022.101686>
- 114 Kissane, D. W. *et al.* Meaning and Purpose (MaP) therapy in advanced cancer patients: a randomised controlled trial. *Support Care Cancer* **31**, 734 (2023). <https://doi.org:10.1007/s00520-023-08189-1>
- 115 Zaman, A. *et al.* Effectiveness of a Tailored Work-Related Support Intervention for Patients Diagnosed with Gastrointestinal Cancer: A Multicenter Randomized Controlled Trial. *J Occup Rehabil* **31**, 323-338 (2021). <https://doi.org:10.1007/s10926-020-09920-z>
- 116 Kim, S. H., Choe, Y. H., Cho, Y. U., Park, S. & Lee, M. H. Effects of a partnership-based, needs-tailored self-management support intervention for post-treatment breast cancer survivors: A randomized controlled trial. *Psychooncology* **31**, 460-469 (2022). <https://doi.org:10.1002/pon.5828>
- 117 McCusker, J. *et al.* CanDirect: Effectiveness of a Telephone-Supported Depression Self-Care Intervention for Cancer Survivors. *J Clin Oncol* **39**, 1150-1161 (2021). <https://doi.org:10.1200/jco.20.01802>
- 118 Lee, J. T., Lee, Y. H. & Chang, Y. P. Mindfulness Stress Management for Female Cancer Survivors Facing the Uncertainty of Disease Progression: A Randomized Controlled Study. *Int J Environ Res Public Health* **19** (2022). <https://doi.org:10.3390/ijerph19084497>



- 119 Lu, Z. *et al.* Early Interdisciplinary Supportive Care in Patients With Previously Untreated Metastatic Esophagogastric Cancer: A Phase III Randomized Controlled Trial. *J Clin Oncol* **39**, 748-756 (2021). <https://doi.org/10.1200/jco.20.01254>
- 120 Kirkegaard, A. M. *et al.* Effects on long-term survival of psychosocial group intervention in early-stage breast cancer: follow-up of a randomized controlled trial. *Acta Oncol* **62**, 422-428 (2023). <https://doi.org/10.1080/0284186x.2023.2203329>
- 121 Oner Cengiz, H., Bayir, B., Sayar, S. & Demirtas, M. Effect of mindfulness-based therapy on spiritual well-being in breast cancer patients: a randomized controlled study. *Support Care Cancer* **31**, 438 (2023). <https://doi.org/10.1007/s00520-023-07904-2>
- 122 Seliniotaki, T. *et al.* Effects of an 8-Week Stress Management Program in Women with Breast Cancer: A Randomized Controlled Trial. *Adv Exp Med Biol* **1339**, 85-95 (2021). [https://doi.org/10.1007/978-3-030-78787-5\\_12](https://doi.org/10.1007/978-3-030-78787-5_12)
- 123 Anderson, K. O. *et al.* Brief cognitive-behavioral audiotape interventions for cancer-related pain: Immediate but not long-term effectiveness. *Cancer* **107**, 207-214 (2006). <https://doi.org/10.1002/cncr.21964>
- 124 Bjorneklett, H. G. *et al.* A randomised controlled trial of support group intervention after breast cancer treatment: results on anxiety and depression. *Acta Oncol* **51**, 198-207 (2012). <https://doi.org/10.3109/0284186X.2011.610352>
- 125 Borosund, E. *et al.* Results from a randomized controlled trial testing StressProffen; an application-based stress-management intervention for cancer survivors. *Cancer Med* **9**, 3775-3785 (2020). <https://doi.org/10.1002/cam4.3000>
- 126 Carbajal-Lopez, E. B., Juarez-Garcia, D. M., Espinoza-Velazco, A. & Calderillo-Ruiz, G. Internet-Delivered Cognitive Behavioral Therapy and Psychoeducation Program for Patients with Gastrointestinal Stromal Tumors. *J Cancer Educ* **37**, 668-674 (2022). <https://doi.org/10.1007/s13187-020-01866-3>
- 127 Rahmani, S., Talepasand, S. & Ghanbary-Motlagh, A. Comparison of effectiveness of the metacognition treatment and the mindfulness-based stress reduction treatment on global and specific life quality of women with breast cancer. *Iran J Cancer Prev* **7**, 184-196 (2014).
- 128 Carlson LE, D. R., Stephen J, Faris P, Tamagawa R, Drysdale E, Specia M. Randomized controlled trial of Mindfulness-based cancer recovery versus supportive expressive group therapy for distressed survivors of breast cancer. (2013). [https://doi.org:https://doi.org/10.1200/jco.2012.47.5210](https://doi.org/https://doi.org/10.1200/jco.2012.47.5210)
- 129 Ell, K. *et al.* Randomized controlled trial of collaborative care management of depression among low-income patients with cancer. *J Clin Oncol* **26**, 4488-4496 (2008). <https://doi.org/10.1200/JCO.2008.16.6371>
- 130 Lapid, M. I. *et al.* Improving the quality of life of geriatric cancer patients with a structured multidisciplinary intervention: a randomized controlled trial. *Palliat Support Care* **5**, 107-114 (2007). <https://doi.org/10.1017/s1478951507070174>
- 131 Lu, J. *et al.* Effectiveness of an Intervention to Promote Self-Efficacy on Quality of Life of Patients with Nasopharyngeal Carcinoma of the Zhuang Tribe Minority in Guangxi, China: A Prospective Study. *Med Sci Monit* **23**, 4077-4086 (2017). <https://doi.org/10.12659/msm.903205>

- 132 Murphy, M. J. *et al.* Randomised controlled trial of internet-delivered cognitive behaviour therapy for clinical depression and/or anxiety in cancer survivors (iCanADAPT Early). *Psychooncology* **29**, 76-85 (2020). <https://doi.org/10.1002/pon.5267>
- 133 Pettiford, J. *et al.* A Bio-Psychosocial Intervention Program for Improving Quality of Life in Breast Cancer Survivors - Final Outcome of a Prospective Randomized Trial. *Breast J* **23**, 537-544 (2017). <https://doi.org/10.1111/tbj.12786>
- 134 Poort, H. *et al.* Cognitive behavioral therapy or graded exercise therapy compared with usual care for severe fatigue in patients with advanced cancer during treatment: a randomized controlled trial. *Ann Oncol* **31**, 115-122 (2020). <https://doi.org/10.1016/j.annonc.2019.09.002>
- 135 Ramirez, A. G. *et al.* Assessing the effect of patient navigator assistance for psychosocial support services on health-related quality of life in a randomized clinical trial in Latino breast, prostate, and colorectal cancer survivors. *Cancer* **126**, 1112-1123 (2020). <https://doi.org/10.1002/cncr.32626>
- 136 Rottmann, N. *et al.* No improvement in distress and quality of life following psychosocial cancer rehabilitation. A randomised trial. *Psychooncology* **21**, 505-514 (2012). <https://doi.org/10.1002/pon.1924>
- 137 Sharpe, M. *et al.* Integrated collaborative care for comorbid major depression in patients with cancer (SMaRT Oncology-2): a multicentre randomised controlled effectiveness trial. *Lancet* **384**, 1099-1108 (2014). [https://doi.org/10.1016/S0140-6736\(14\)61231-9](https://doi.org/10.1016/S0140-6736(14)61231-9)
- 138 Sohl, S. J., Dietrich, M. S., Wallston, K. A. & Ridner, S. H. A randomized controlled trial of expressive writing in breast cancer survivors with lymphedema. *Psychol Health* **32**, 826-842 (2017). <https://doi.org/10.1080/08870446.2017.1307372>
- 139 Ploos van Amstel, F. K. *et al.* Does a regular nurse-led distress screening and discussion improve quality of life of breast cancer patients treated with curative intent? A randomized controlled trial. *Psychooncology* **29**, 719-728 (2020). <https://doi.org/10.1002/pon.5324>
- 140 Yanez, B. *et al.* Feasibility, acceptability, and preliminary efficacy of a technology-assisted psychosocial intervention for racially diverse men with advanced prostate cancer. *Cancer* **121**, 4407-4415 (2015). <https://doi.org/10.1002/cncr.29658>
- 141 Wenzel, L. *et al.* Psychosocial telephone counseling for survivors of cervical cancer: results of a randomized biobehavioral trial. *J Clin Oncol* **33**, 1171-1179 (2015). <https://doi.org/10.1200/JCO.2014.57.4079>
- 142 Urech, C. *et al.* Web-Based Stress Management for Newly Diagnosed Patients With Cancer (STREAM): A Randomized, Wait-List Controlled Intervention Study. *J Clin Oncol* **36**, 780-788 (2018). <https://doi.org/10.1200/JCO.2017.74.8491>
- 143 Lerman, R., Jarski, R., Rea, H., Gellish, R. & Vicini, F. Improving symptoms and quality of life of female cancer survivors: a randomized controlled study. *Ann Surg Oncol* **19**, 373-378 (2012). <https://doi.org/10.1245/s10434-011-2051-2>
